# Supplementary material for: Combination PPARγ and RXR Agonist Treatment in Melanoma Cells: Functional Importance of S100A2
Source: PPAR Res. 2009 Oct 18;2010:729876. doi: 10.1155/2010/729876 (PMC2763133; doi:10.1155/2010/729876)
Supplement: Supplementary file 1 — Complete microarray data set of A375(DRO) after rexinoid, TZD and combination therapy for 24 hours using the Affymetrix GeneChip Human Genome U133A platform. [file 729876.f1.xls]

## Sheet: ROSI up 2
Treatment ()*	DMSO	Rosi	Gene Symbol	fold change						Gene Title		Probe Set ID	Gene Symbol	Gene Title	Entrez Gene ID	Chromosomal Location
AFFX-r2-Hs18SrRNA-5_at	0.0119102	6.84506	---	574.721	---		1494_f_at	NM_000762		TSC22 domain family, member 4		1494_f_at	CYP2A6	cytochrome P450, family 2, subfamily A, polypeptide 6	1548	19q13.2
AFFX-HUMRGE/M10098_5_at	0.012319	6.16244	---	500.238	---		200630_x_at	NM_001122821 /// NM_003011		CD248 molecule, endosialin		200630_x_at	SET	SET nuclear oncogene	6418	9q34
AFFX-HUMRGE/M10098_M_at	0.0194984	3.26811	---	167.609	---		201261_x_at	NM_001711		CDNA FLJ12002 fis, clone HEMBB1001536		201261_x_at	BGN	biglycan	633	Xq28
AFFX-r2-Hs28SrRNA-3_at	0.0309506	3.88837	---	125.632	---		201404_x_at	NM_002794		ATPase, class I, type 8B, member 1		201404_x_at	PSMB2	proteasome (prosome, macropain) subunit, beta type, 2	5690	1p34.2
AFFX-r2-Hs18SrRNA-M_x_at	0.0787487	3.47969	---	44.1873	---		201474_s_at	NM_002204 /// NM_005501		hairless homolog (mouse)		201474_s_at	ITGA3	integrin, alpha 3 (antigen CD49C, alpha 3 subunit of VLA-3 receptor)	3675	17q21.33
AFFX-r2-Hs18SrRNA-3_s_at	0.0758318	2.68398	---	35.3938	---		202028_s_at	NM_000999 /// NM_001035258		ATP-binding cassette, sub-family A (ABC1), member 1		202028_s_at	RPL38	ribosomal protein L38	6169	17q23-q25
AFFX-M27830_5_at	0.124216	4.26324	---	34.3213	---		202067_s_at	NM_000527		tubulin, alpha 3c /// tubulin, alpha 3d		202067_s_at	LDLR	low density lipoprotein receptor (familial hypercholesterolemia)	3949	19p13.3
AFFX-M27830_M_at	0.175443	5.46178	---	31.1314	---		202709_at	NM_002023		solute carrier organic anion transporter family, member 3A1		202709_at	FMOD	fibromodulin	2331	1q32
AFFX-HUMRGE/M10098_3_at	0.094696	2.82664	---	29.8496	---		202723_s_at	NM_002015		KIAA1539		202723_s_at	FOXO1	forkhead box O1	2308	13q14.1
221009_s_at	0.0563719	1.6566	ANGPTL4	29.387	NM_001039667		203504_s_at	NM_005502		myosin binding protein C, slow type		203504_s_at	ABCA1	ATP-binding cassette, sub-family A (ABC1), member 1	19	9q31.1
204468_s_at	0.0504826	0.661857	TIE1	13.1106	NM_005424		203514_at	NM_002401 /// NM_203351		Transcribed locus		203514_at	MAP3K3	mitogen-activated protein kinase kinase kinase 3	4215	17q23.3
212044_s_at	0.253885	2.76638	RPL27A	10.8962	NM_000990		203735_x_at	NM_003622 /// NM_177444		zinc finger protein 280A		203735_x_at	PPFIBP1	PTPRF interacting protein, binding protein 1 (liprin beta 1)	8496	12p11.23-p11.22
213642_at	0.349565	3.6055	---	10.3142	---		203868_s_at	NM_001078 /// NM_080682		ADP-ribosyltransferase 1		203868_s_at	VCAM1	vascular cell adhesion molecule 1	7412	1p32-p31
39402_at	0.201376	1.86595	IL1B	9.266	NM_000576		203920_at	NM_005693		solute carrier family 11 (proton-coupled divalent metal ion transporters), member 1		203920_at	NR1H3	nuclear receptor subfamily 1, group H, member 3	10062	11p11.2
214041_x_at	0.339035	2.84859	RPL37A	8.40206	NM_000998		204043_at	NM_000355		myosin, light chain 4, alkali; atrial, embryonic		204043_at	TCN2	transcobalamin II; macrocytic anemia	6948	22q12.2
205067_at	0.207016	1.70499	IL1B	8.23601	NM_000576		204268_at	NM_005978		myelin protein zero-like 1		204268_at	S100A2	S100 calcium binding protein A2	6273	1q21
215182_x_at	0.347659	2.62791	---	7.55887	---		204468_s_at	NM_005424		adaptor-related protein complex 3, beta 2 subunit		204468_s_at	TIE1	tyrosine kinase with immunoglobulin-like and EGF-like domains 1	7075	1p34-p33
AFFX-r2-Hs28SrRNA-M_at	0.359732	2.42796	---	6.74936	---		204472_at	NM_005261 /// NM_181702		PTPRF interacting protein, binding protein 1 (liprin beta 1)		204472_at	GEM	GTP binding protein overexpressed in skeletal muscle	2669	8q13-q21
214001_x_at	0.282697	1.84496	---	6.52628	---		204682_at	NM_000428		methylthioadenosine phosphorylase		204682_at	LTBP2	latent transforming growth factor beta binding protein 2	4053	14q24
216246_at	0.320217	2.00836	---	6.27186	---		204926_at	NM_002192		trace amine associated receptor 2		204926_at	INHBA	inhibin, beta A	3624	7p15-p13
205239_at	0.308558	1.8942	AREG /// LOC727738	6.13885	NM_001657		205067_at	NM_000576		neuronal cell adhesion molecule		205067_at	IL1B	interleukin 1, beta	3553	2q14
202028_s_at	0.455853	2.7749	RPL38	6.08727	NM_000999		205128_x_at	NM_000962 /// NM_080591		sodium channel, voltage-gated, type X, alpha subunit		205128_x_at	PTGS1	prostaglandin-endoperoxide synthase 1 (prostaglandin G/H synthase and cyclooxygenase)	5742	9q32-q33.3
208048_at	0.418275	2.32841	TACR1	5.56669	NM_001058		205239_at	NM_001657 /// XM_001125684		cytochrome P450, family 1, subfamily A, polypeptide 2		205239_at	AREG /// LOC727738	amphiregulin (schwannoma-derived growth factor) /// similar to Amphiregulin precursor (AR) (Colorectum cell-derived growth factor) (CRDGF)	374 /// 727738	4q13-q21 /// 4q13.3
216609_at	0.402814	2.22228	TXN	5.51688	NM_003329		205357_s_at	NM_000685 /// NM_004835 /// NM_009585 /// NM_031850 /// NM_032049		---		205357_s_at	AGTR1	angiotensin II receptor, type 1	185	3q21-q25
214057_at	0.327103	1.79379	MCL1	5.48385	NM_021960		205678_at	NM_004644		membrane protein, palmitoylated 3 (MAGUK p55 subfamily member 3)		205678_at	AP3B2	adaptor-related protein complex 3, beta 2 subunit	8120	15q
217383_at	0.448819	2.45205	PGK1	5.46333	NM_000291		205960_at	NM_002612		FKSG49		205960_at	PDK4	pyruvate dehydrogenase kinase, isozyme 4	5166	7q21.3
221943_x_at	0.376897	2.0244	RPL38	5.37122	NM_000999		205998_x_at	NM_017460		solute carrier family 28 (sodium-coupled nucleoside transporter), member 3		205998_x_at	CYP3A4	cytochrome P450, family 3, subfamily A, polypeptide 4	1576	7q21.1
208229_at	0.375147	1.94898	FGFR2	5.19525	NM_000141		206178_at	NM_000929		cytochrome P450, family 2, subfamily C, polypeptide 9		206178_at	PLA2G5	phospholipase A2, group V	5322	1p36-p34
217136_at	0.46308	2.32556	LOC653505 /// LOC653598 /// PPIAL4 /// RP6-206I17.5	5.02194	NM_001123068		206186_at	NM_001932 /// NR_003562		tectonic family member 2		206186_at	MPP3	membrane protein, palmitoylated 3 (MAGUK p55 subfamily member 3)	4356	17q21.31
221960_s_at	0.342473	1.71347	RAB2A	5.00322	NM_002865		206438_x_at	NM_024809		fibrosin		206438_x_at	TCTN2	tectonic family member 2	79867	12q24.31
204268_at	0.241923	1.1823	S100A2	4.88709	NM_005978		206543_at	NM_003070 /// NM_139045		histone cluster 1, H4g		206543_at	SMARCA2	SWI/SNF related, matrix associated, actin dependent regulator of chromatin, subfamily a, member 2	6595	9p22.3
216554_s_at	0.42058	2.03839	---	4.84662	---		206568_at	NM_003284		myosin light chain 2, precursor lymphocyte-specific		206568_at	TNP1	transition protein 1 (during histone to protamine replacement)	7141	2q35-q36
222051_s_at	0.551612	2.64677	LOC100131637	4.79825	XM_001716033		206816_s_at	NM_001039592 /// NM_172312		serine palmitoyltransferase, long chain base subunit 2		206816_s_at	SPAG8	sperm associated antigen 8	26206	9p13.3
219954_s_at	0.354953	1.66444	GBA3	4.68917	NM_020973		206878_at	NM_001917		aldehyde dehydrogenase 1 family, member B1		206878_at	DAO	D-amino-acid oxidase	1610	12q24
213281_at	0.369093	1.60654	JUN	4.35268	NM_002228		207152_at	NM_001007097 /// NM_001018064 /// NM_001018065 /// NM_001018066 /// NM_006180		similar to hCG2041276		207152_at	NTRK2	neurotrophic tyrosine kinase, receptor, type 2	4915	9q22.1
206543_at	0.378056	1.57	SMARCA2	4.15283	NM_003070		207389_at	NM_000173		glycoprotein Ib (platelet), alpha polypeptide		207389_at	GP1BA	glycoprotein Ib (platelet), alpha polypeptide	2811	17pter-p12
219599_at	0.559895	2.31882	EIF4B	4.14153	NM_001417		207608_x_at	NM_000761		transcobalamin II; macrocytic anemia		207608_x_at	CYP1A2	cytochrome P450, family 1, subfamily A, polypeptide 2	1544	15q24
214395_x_at	0.448414	1.8253	---	4.07057	---		207688_s_at	---		PDZ and LIM domain 4		207688_s_at	---	---	---	---
208322_s_at	0.364236	1.46778	ST3GAL1	4.02974	NM_003033		207765_s_at	NM_025182		Thrombospondin 1		207765_s_at	KIAA1539	KIAA1539	80256	9p13.3
209789_at	0.32517	1.30997	CORO2B	4.02857	NM_006091		207919_at	NM_004314		cytochrome P450, family 2, subfamily C, polypeptide 9		207919_at	ART1	ADP-ribosyltransferase 1	417	11p15
216450_x_at	0.448529	1.78062	HSP90B1	3.96991	NM_003299		207951_at	NM_001891		myosin VC		207951_at	CSN2	casein beta	1447	4q21.1
204926_at	0.447501	1.69756	INHBA	3.79341	NM_002192		207969_x_at	NM_001612 /// NM_020069 /// NM_020107 /// NM_020108 /// NM_020109 /// NM_020110 /// NM_020111 /// NM_020113 /// NM_020115		potassium inwardly-rectifying channel, subfamily J, member 14		207969_x_at	ACRV1	acrosomal vesicle protein 1	56	11q23-q24
219892_at	0.445635	1.66878	TM6SF1	3.74473	NM_023003		208048_at	NM_001058 /// NM_015727		proteasome (prosome, macropain) subunit, beta type, 2		208048_at	TACR1	tachykinin receptor 1	6869	2p13.1
207951_at	0.445649	1.66138	CSN2	3.72799	NM_001891		208104_s_at	NM_030935		cytochrome P450, family 3, subfamily A, polypeptide 4		208104_s_at	TSC22D4	TSC22 domain family, member 4	81628	7p21-p15
215450_at	0.412823	1.51381	---	3.66696	---		208229_at	NM_000141 /// NM_022970		Immunoglobulin heavy constant mu		208229_at	FGFR2	fibroblast growth factor receptor 2 (bacteria-expressed kinase, keratinocyte growth factor receptor, craniofacial dysostosis 1, Crouzon syndrome, Pfeiffer syndrome, Jackson-Weiss syndrome)	2263	10q26
213826_s_at	0.504967	1.81191	LOC100133109	3.58818	XM_001716009		208322_s_at	NM_003033 /// NM_173344		GTP binding protein overexpressed in skeletal muscle		208322_s_at	ST3GAL1	ST3 beta-galactoside alpha-2,3-sialyltransferase 1	6482	8q24.22
217471_at	0.420289	1.4934	---	3.55327	---		208360_s_at	---		abhydrolase domain containing 2		208360_s_at	---	---	---	---
217173_s_at	0.507716	1.7732	LDLR	3.4925	NM_000527		208448_x_at	NM_002173		Cytochrome P450, family 2, subfamily C, polypeptide 9		208448_x_at	IFNA16	interferon, alpha 16	3449	9p22
206816_s_at	0.627395	2.16714	SPAG8	3.45418	NM_001039592		208486_at	NM_000798		---		208486_at	DRD5	dopamine receptor D5	1816	4p16.1
213120_at	0.616524	2.05692	UHRF1BP1L	3.33632	NM_001006947		208551_at	NM_003547		latent transforming growth factor beta binding protein 2		208551_at	HIST1H4G	histone cluster 1, H4g	8369	6p21.3
210797_s_at	0.532479	1.76688	OASL	3.31822	NM_003733		208578_at	NM_006514		chromosome 6 open reading frame 62		208578_at	SCN10A	sodium channel, voltage-gated, type X, alpha subunit	6336	3p22-p21
201474_s_at	0.434277	1.43947	ITGA3	3.31463	NM_002204		209646_x_at	NM_000692		pregnancy specific beta-1-glycoprotein 6		209646_x_at	ALDH1B1	aldehyde dehydrogenase 1 family, member B1	219	9p11.1
216322_at	0.708077	2.3336	CD58	3.29569	NM_001779		209701_at	NM_001040458 /// NM_016442		SET nuclear oncogene		209701_at	ERAP1	endoplasmic reticulum aminopeptidase 1	51752	5q15
210098_s_at	0.436723	1.43098	---	3.27664	---		209738_x_at	NM_001031850 /// NM_002782		sperm adhesion molecule 1 (PH-20 hyaluronidase, zona pellucida binding)		209738_x_at	PSG6	pregnancy specific beta-1-glycoprotein 6	5675	19q13.2
220703_at	0.514277	1.68185	C10orf110	3.27032	XR_039896		209789_at	NM_006091		acrosomal vesicle protein 1		209789_at	CORO2B	coronin, actin binding protein, 2B	10391	15q23
211388_s_at	0.469962	1.53471	---	3.2656	---		210086_at	NM_005144 /// NM_018411		complement component (3b/4b) receptor 1 (Knops blood group)		210086_at	HR	hairless homolog (mouse)	55806	8p21.2
205128_x_at	0.61206	1.98857	PTGS1	3.24897	NM_000962		210088_x_at	NM_001002841 /// NM_002476		phospholipase A2, group V		210088_x_at	MYL4	myosin, light chain 4, alkali; atrial, embryonic	4635	17q21-qter
215557_at	0.509654	1.6328	---	3.20373	---		210098_s_at	---		pregnancy specific beta-1-glycoprotein 1		210098_s_at	---	---	---	---
205357_s_at	0.626135	1.88439	AGTR1	3.00956	NM_000685		210195_s_at	NM_006905		AF4/FMR2 family, member 1		210195_s_at	PSG1	pregnancy specific beta-1-glycoprotein 1	5669	19q13.2
221444_at	0.408092	1.21842	TAS2R16	2.98566	NM_016945		210210_at	NM_003953 /// NM_024569		butyrophilin-like 3		210210_at	MPZL1	myelin protein zero-like 1	9019	1q24.2
213307_at	0.448678	1.33681	SHANK2	2.97944	NM_012309		210422_x_at	NM_000578		mucin 3A, cell surface associated		210422_x_at	SLC11A1	solute carrier family 11 (proton-coupled divalent metal ion transporters), member 1	6556	2q35
210422_x_at	0.626457	1.86221	SLC11A1	2.97261	NM_000578		210542_s_at	NM_013272		biglycan		210542_s_at	SLCO3A1	solute carrier organic anion transporter family, member 3A1	28232	15q26
215883_at	0.511002	1.50397	CTNNA1	2.94318	NM_001903		210704_at	NM_001042548 /// NM_005102		fasciculation and elongation protein zeta 2 (zygin II)		210704_at	FEZ2	fasciculation and elongation protein zeta 2 (zygin II)	9637	2p21
214313_s_at	0.532771	1.55488	EIF5B	2.91848	NM_015904		210797_s_at	NM_003733 /// NM_198213		CDNA FLJ14080 fis, clone HEMBB1002152		210797_s_at	OASL	2'-5'-oligoadenylate synthetase-like	8638	12q24.2
216371_at	0.530618	1.5462	---	2.91397	---		211230_s_at	NM_005026		endoplasmic reticulum aminopeptidase 1		211230_s_at	PIK3CD	phosphoinositide-3-kinase, catalytic, delta polypeptide	5293	1p36.2
213409_s_at	0.666847	1.9417	RHEB	2.91176	NM_005614		211364_at	NM_002451		nuclear receptor subfamily 1, group H, member 3		211364_at	MTAP	methylthioadenosine phosphorylase	4507	9p21
208486_at	0.570336	1.6572	DRD5	2.90565	NM_000798		211388_s_at	---		testis-specific kinase substrate		211388_s_at	---	---	---	---
213705_at	0.55144	1.60116	---	2.9036	---		211454_x_at	XR_041698		transition protein 1 (during histone to protamine replacement)		211454_x_at	FKSG49	FKSG49	400949	5q13.3
217875_s_at	0.51877	1.49187	PMEPA1	2.87579	NM_020182		211826_s_at	NM_005935		---		211826_s_at	AFF1	AF4/FMR2 family, member 1	4299	4q21
222370_x_at	0.647969	1.85827	---	2.86783	---		211959_at	NM_000599		fibromodulin		211959_at	IGFBP5	insulin-like growth factor binding protein 5	3488	2q33-q36
208448_x_at	0.477724	1.36565	IFNA16	2.85866	NM_002173		212044_s_at	NM_000990		HECT, C2 and WW domain containing E3 ubiquitin protein ligase 1		212044_s_at	RPL27A	Ribosomal protein L27a	6157	11p15
1494_f_at	0.520752	1.4785	CYP2A6	2.83916	NM_000762		213120_at	NM_001006947 /// NM_015054		calpain 2, (m/II) large subunit		213120_at	UHRF1BP1L	UHRF1 (ICBP90) binding protein 1-like	23074	12q23.1
203868_s_at	0.637355	1.8054	VCAM1	2.83264	NM_001078		213281_at	NM_002228		Protein phosphatase 3 (formerly 2B), catalytic subunit, gamma isoform		213281_at	JUN	Jun oncogene	3725	1p32-p31
222187_x_at	0.597069	1.69067	G3BP1	2.83162	NM_005754		213307_at	NM_012309 /// NM_133266		---		213307_at	SHANK2	SH3 and multiple ankyrin repeat domains 2	22941	11q13.3
221033_s_at	0.65307	1.84451	RNF17	2.82438	NM_031277		213409_s_at	NM_005614		pyruvate dehydrogenase kinase, isozyme 4		213409_s_at	RHEB	Ras homolog enriched in brain	6009	7q36
220266_s_at	0.430724	1.20043	KLF4	2.787	NM_004235		213642_at	---		G-rich RNA sequence binding factor 1		213642_at	---	---	---	---
219860_at	0.815504	2.27094	LY6G5C	2.7847	NM_025262		213705_at	---		zinc finger protein 816A /// zinc finger protein 321		213705_at	---	CDNA FLJ30007 fis, clone 3NB692000012	---	---
220682_s_at	0.446835	1.23768	---	2.76989	---		213826_s_at	XM_001716009 /// XM_001716442 /// XM_001718803		insulin-like growth factor binding protein 5		213826_s_at	LOC100133109	similar to histone	100133109	2q31.1
216580_at	0.564568	1.55551	hCG_2015956 /// LOC100127893 /// LOC100130892 /// LOC100131085 /// LOC388401 /// LOC441896 /// LOC641900 /// LOC646346 /// LOC728380 /// LOC728843 /// RPL7	2.75523	NM_000971		213875_x_at	NM_030939		phosphoinositide-3-kinase, catalytic, delta polypeptide		213875_x_at	C6orf62	chromosome 6 open reading frame 62	81688	6p22.2
206878_at	0.634847	1.74847	DAO	2.75416	NM_001917		214001_x_at	---		forkhead box O1		214001_x_at	---	CDNA: FLJ21700 fis, clone COL09849, highly similar to HSU14972 Human ribosomal protein S10 mRNA	---	---
220115_s_at	0.560596	1.54323	CDH10	2.75284	NM_006727		214041_x_at	NM_000998		phospholipase A2, group V		214041_x_at	RPL37A	Ribosomal protein L37a	6168	2q35
220166_at	0.588555	1.61965	CNNM1	2.75191	NM_020348		214057_at	NM_021960 /// NM_182763		---		214057_at	MCL1	Myeloid cell leukemia sequence 1 (BCL2-related)	4170	1q21
207152_at	0.597459	1.64394	NTRK2	2.75155	NM_001007097		214087_s_at	NM_002465 /// NM_206819 /// NM_206820 /// NM_206821		mitogen-activated protein kinase kinase kinase 3		214087_s_at	MYBPC1	myosin binding protein C, slow type	4604	12q23.2
221841_s_at	0.466685	1.2808	KLF4	2.74445	NM_004235		214175_x_at	NM_003687		Transcribed locus		214175_x_at	PDLIM4	PDZ and LIM domain 4	8572	5q31.1
202067_s_at	0.579175	1.58781	LDLR	2.7415	NM_000527		214313_s_at	NM_015904		---		214313_s_at	EIF5B	Eukaryotic translation initiation factor 5B	9669	2q11.2
221339_at	0.667666	1.81079	OR10C1	2.71211	NM_013941		214395_x_at	---		olfactory receptor, family 10, subfamily C, member 1		214395_x_at	---	CDNA clone IMAGE:4838699	---	---
222329_x_at	0.670104	1.80878	---	2.69925	---		214421_x_at	NM_000771		low density lipoprotein receptor (familial hypercholesterolemia)		214421_x_at	CYP2C9	cytochrome P450, family 2, subfamily C, polypeptide 9	1559	10q24
217580_x_at	0.59755	1.61235	---	2.69826	---		214594_x_at	NM_005603		Kruppel-like factor 4 (gut)		214594_x_at	ATP8B1	ATPase, class I, type 8B, member 1	5205	18q21-q22|18q21.31
203514_at	0.652905	1.75689	MAP3K3	2.69089	NM_002401		214888_at	NM_001748		neurotrophic tyrosine kinase, receptor, type 2		214888_at	CAPN2	calpain 2, (m/II) large subunit	824	1q41-q42
208360_s_at	0.528064	1.42073	---	2.69046	---		215182_x_at	---		cyclin M1		215182_x_at	---	MRNA; cDNA DKFZp586E121 (from clone DKFZp586E121)	---	---
215870_s_at	0.406787	1.08911	PLA2G5	2.67734	NM_000929		215372_x_at	---		cadherin 10, type 2 (T2-cadherin)		215372_x_at	---	CDNA FLJ12002 fis, clone HEMBB1001536	---	---
202723_s_at	0.518614	1.3767	FOXO1	2.65457	NM_002015		215450_at	---		D-amino-acid oxidase		215450_at	---	---	---	---
211230_s_at	0.779955	2.06323	PIK3CD	2.64532	NM_005026		215557_at	---		ribosomal protein L7 /// similar to ribosomal protein L7 /// similar to 60S ribosomal protein L7 /// hCG2015956 /// hypothetical LOC728380 /// hypothetical LOC728843 /// hypothetical protein LOC100130892 /// hypothetical LOC100131085		215557_at	---	CDNA FLJ10146 fis, clone HEMBA1003327	---	---
211959_at	0.955481	2.51518	IGFBP5	2.63237	NM_000599		215584_at	NM_015052		---		215584_at	HECW1	HECT, C2 and WW domain containing E3 ubiquitin protein ligase 1	23072	7p14.1-p13
217541_x_at	0.630348	1.65623	ZNF321 /// ZNF816A	2.62749	NM_001031665		215775_at	NM_003246		lymphocyte antigen 6 complex, locus G5C		215775_at	THBS1	Thrombospondin 1	7057	15q15
221917_s_at	0.627245	1.64583	GRSF1	2.62391	NM_001098477		215870_s_at	NM_000929		Kruppel-like factor 4 (gut)		215870_s_at	PLA2G5	phospholipase A2, group V	5322	1p36-p34
205960_at	0.378376	0.990494	PDK4	2.61775	NM_002612		215883_at	NM_001903		ring finger protein 17		215883_at	CTNNA1	Catenin (cadherin-associated protein), alpha 1, 102kDa	1495	5q31
216363_at	0.558862	1.46017	---	2.61275	---		216025_x_at	NM_000771		GTPase activating protein (SH3 domain) binding protein 1		216025_x_at	CYP2C9	cytochrome P450, family 2, subfamily C, polypeptide 9	1559	10q24
32540_at	0.736509	1.91898	PPP3CC	2.60551	NM_005605		216034_at	NM_080740		vascular cell adhesion molecule 1		216034_at	ZNF280A	zinc finger protein 280A	129025	22q11.22
214888_at	0.689689	1.78335	CAPN2	2.58572	NM_001748		216110_x_at	---		cytochrome P450, family 2, subfamily A, polypeptide 6		216110_x_at	---	CDNA FLJ14080 fis, clone HEMBB1002152	---	---
215584_at	0.634886	1.64012	HECW1	2.58333	NM_015052		216177_at	XR_017287 /// XR_018883 /// XR_038069		interferon, alpha 16		216177_at	LOC391132	similar to hCG2041276	391132	1q24.2
202709_at	0.672909	1.73807	FMOD	2.58291	NM_002023		216203_at	NM_004863		---		216203_at	SPTLC2	serine palmitoyltransferase, long chain base subunit 2	9517	14q24.3-q31
207688_s_at	0.597366	1.54132	---	2.58019	---		216246_at	---		prostate transmembrane protein, androgen induced 1		216246_at	---	---	---	---
206568_at	0.495056	1.2767	TNP1	2.57889	NM_003284		216318_at	---		CDNA FLJ30007 fis, clone 3NB692000012		216318_at	IGHG1	Immunoglobulin heavy constant mu	3500	14q32.33
220545_s_at	0.658389	1.69117	TSKS	2.56865	NM_021733		216322_at	NM_001779		dopamine receptor D5		216322_at	CD58	CD58 molecule	965	1p13
203920_at	0.522233	1.33491	NR1H3	2.55615	NM_005693		216323_x_at	NM_006001 /// NM_080386		Ras homolog enriched in brain		216323_x_at	TUBA3C /// TUBA3D	tubulin, alpha 3c /// tubulin, alpha 3d	113457 /// 7278	13q11 /// 2q21.1
209701_at	0.594945	1.51761	ERAP1	2.55085	NM_001040458		216363_at	---		---		216363_at	---	---	---	---
216110_x_at	0.526423	1.34115	---	2.54766	---		216371_at	---		Eukaryotic translation initiation factor 5B		216371_at	---	---	---	---
210704_at	0.720966	1.8356	FEZ2	2.54603	NM_001042548 /// NM_005102		216372_at	---		Catenin (cadherin-associated protein), alpha 1, 102kDa		216372_at	---	---	---	---
201261_x_at	0.55875	1.40702	BGN	2.51815	NM_001711		216450_x_at	NM_003299		solute carrier family 11 (proton-coupled divalent metal ion transporters), member 1		216450_x_at	HSP90B1	heat shock protein 90kDa beta (Grp94), member 1	7184	12q24.2-q24.3
217117_x_at	0.746377	1.8685	MUC3A	2.50343	XM_001719499 /// XM_001725354		216554_s_at	---		SH3 and multiple ankyrin repeat domains 2		216554_s_at	---	---	---	---
217207_s_at	0.74112	1.8518	BTNL3	2.49865	NM_197975		216580_at	NM_000971 /// XM_001719048 /// XM_001720172 /// XM_001722435 /// XM_001722574 /// XM_001725978 /// XM_943842 /// XR_015391 /// XR_015500 /// XR_015600 /// XR_015705 /// XR_016234 /// XR_016879 /// XR_017105 /// XR_018042 /// XR_018794 /// XR_019544 /// XR_038286 /// XR_038691 /// XR_038779 /// XR_038885 /// XR_038901 /// XR_038947 /// XR_039043 /// XR_039090 /// XR_039345 /// XR_039473 /// XR_039…		taste receptor, type 2, member 16		216580_at	hCG_2015956 /// LOC100127893 /// LOC100130892 /// LOC100131085 /// LOC388401 /// LOC441896 /// LOC641900 /// LOC646346 /// LOC728380 /// LOC728843 /// RPL7	ribosomal protein L7 /// similar to ribosomal protein L7 /// similar to 60S ribosomal protein L7 /// hCG2015956 /// hypothetical LOC728380 /// hypothetical LOC728843 /// hypothetical protein LOC100130892 /// hypothetical LOC100131085	100127893 /// 100130892 /// 100131085 /// 388401 /// 441896 /// 6129 /// 641900 /// 646346 /// 648000 /// 728380 /// 728843	17q21.33 /// 1p13.3 /// 2p22.2 /// 5q14.1 /// 5q34 /// 6p22.3 /// 7q31.1 /// 8q21.11 /// Xp21.3
211826_s_at	0.663077	1.64636	AFF1	2.48291	NM_005935		216609_at	NM_003329		angiotensin II receptor, type 1		216609_at	TXN	Thioredoxin	7295	9q31
210195_s_at	0.547952	1.35658	PSG1	2.47572	NM_006905		216661_x_at	NM_000771		CDNA FLJ10146 fis, clone HEMBA1003327		216661_x_at	CYP2C9	Cytochrome P450, family 2, subfamily C, polypeptide 9	1559	10q24
206178_at	0.432225	1.06792	PLA2G5	2.47074	NM_000929		216959_x_at	NM_001037132 /// NM_001037133 /// NM_005010		prostaglandin-endoperoxide synthase 1 (prostaglandin G/H synthase and cyclooxygenase)		216959_x_at	NRCAM	neuronal cell adhesion molecule	4897	7q31.1-q31.2
217484_at	0.575672	1.41901	CR1	2.46497	NM_000573 /// NM_000651		216989_at	NM_003117 /// NM_153189		---		216989_at	SPAM1	sperm adhesion molecule 1 (PH-20 hyaluronidase, zona pellucida binding)	6677	7q31.3
207969_x_at	0.635324	1.54977	ACRV1	2.43934	NM_001612 /// NM_020069 /// NM_020107 /// NM_020108 /// NM_020109 /// NM_020110 /// NM_020111 /// NM_020113 /// NM_020115		217117_x_at	XM_001719499 /// XM_001725354		chromosome 10 open reading frame 110		217117_x_at	MUC3A	mucin 3A, cell surface associated	4584	7q22
216989_at	0.538442	1.30083	SPAM1	2.41592	NM_003117 /// NM_153189		217136_at	NM_001123068 /// NM_178230 /// XM_927706 /// XM_927767 /// XM_928338		---		217136_at	LOC653505 /// LOC653598 /// PPIAL4 /// RP6-206I17.5	peptidylprolyl isomerase A (cyclophilin A)-like 4 /// peptidylprolyl isomerase A (cyclophilin A)-like /// similar to cyclophilin-LC (COAS2)	164022 /// 644591 /// 653505 /// 653598	1q21.1
200630_x_at	0.626703	1.50442	SET	2.40053	NM_001122821 /// NM_003011		217173_s_at	NM_000527		CD58 molecule		217173_s_at	LDLR	low density lipoprotein receptor (familial hypercholesterolemia)	3949	19p13.3
209738_x_at	0.700062	1.67883	PSG6	2.39812	NM_001031850 /// NM_002782		217207_s_at	NM_197975		integrin, alpha 3 (antigen CD49C, alpha 3 subunit of VLA-3 receptor)		217207_s_at	BTNL3	butyrophilin-like 3	10917	5q35.3
213875_x_at	0.673758	1.61325	C6orf62	2.3944	NM_030939		217383_at	NM_000291		2'-5'-oligoadenylate synthetase-like		217383_at	PGK1	Phosphoglycerate kinase 1	5230	Xq13
204682_at	0.699599	1.67392	LTBP2	2.39268	NM_000428		217471_at	---		UHRF1 (ICBP90) binding protein 1-like		217471_at	---	MRNA; cDNA DKFZp586B1324 (from clone DKFZp586B1324)	---	---
221995_s_at	0.641515	1.52981	---	2.38469	---		217473_x_at	NM_000578		sperm associated antigen 8		217473_x_at	SLC11A1	solute carrier family 11 (proton-coupled divalent metal ion transporters), member 1	6556	2q35
216661_x_at	0.642067	1.51277	CYP2C9	2.35609	NM_000771		217484_at	NM_000573 /// NM_000651		low density lipoprotein receptor (familial hypercholesterolemia)		217484_at	CR1	complement component (3b/4b) receptor 1 (Knops blood group)	1378	1q32
221815_at	0.464376	1.09188	ABHD2	2.35129	NM_007011 /// NM_152924		217541_x_at	NM_001031665 /// NM_203307		MRNA; cDNA DKFZp586B1324 (from clone DKFZp586B1324)		217541_x_at	ZNF321 /// ZNF816A	zinc finger protein 816A /// zinc finger protein 321	125893 /// 399669	19q13.41
204472_at	0.338592	0.791243	GEM	2.33686	NM_005261 /// NM_181702		217580_x_at	---		similar to histone		217580_x_at	---	Transcribed locus	---	---
216318_at	0.715703	1.66937	IGHG1	2.33249	---		217629_at	---		---		217629_at	---	Transcribed locus	---	---
205998_x_at	0.615998	1.43132	CYP3A4	2.32358	NM_017460		217875_s_at	NM_020182 /// NM_199169 /// NM_199170 /// NM_199171		casein beta		217875_s_at	PMEPA1	prostate transmembrane protein, androgen induced 1	56937	20q13.31-q13.33
201404_x_at	0.673107	1.56298	PSMB2	2.32205	NM_002794		218255_s_at	NM_001105079		transmembrane 6 superfamily member 1		218255_s_at	FBRS	fibrosin	64319	16p11.2
220776_at	0.725118	1.67171	KCNJ14	2.30543	NM_013348 /// NM_170720		218966_at	NM_018728		inhibin, beta A		218966_at	MYO5C	myosin VC	55930	15q21
218966_at	0.63983	1.47464	MYO5C	2.30473	NM_018728		219025_at	NM_020404		heat shock protein 90kDa beta (Grp94), member 1		219025_at	CD248	CD248 molecule, endosialin	57124	11q13
216025_x_at	0.618012	1.4199	CYP2C9	2.29754	NM_000771		219599_at	NM_001417		coronin, actin binding protein, 2B		219599_at	EIF4B	eukaryotic translation initiation factor 4B	1975	12q13.13
215775_at	0.655399	1.50029	THBS1	2.28912	NM_003246		219860_at	NM_025262		ST3 beta-galactoside alpha-2,3-sialyltransferase 1		219860_at	LY6G5C	lymphocyte antigen 6 complex, locus G5C	80741	6p21.33
214175_x_at	0.456712	1.04326	PDLIM4	2.28429	NM_003687		219892_at	NM_023003		CDNA clone IMAGE:4838699		219892_at	TM6SF1	transmembrane 6 superfamily member 1	53346	15q24-q26
204043_at	0.703355	1.59962	TCN2	2.27427	NM_000355		219954_s_at	NM_020973		eukaryotic translation initiation factor 4B		219954_s_at	GBA3	glucosidase, beta, acid 3 (cytosolic)	57733	4p15.31
207389_at	0.811857	1.84404	GP1BA	2.27139	NM_000173		220115_s_at	NM_006727		SWI/SNF related, matrix associated, actin dependent regulator of chromatin, subfamily a, member 2		220115_s_at	CDH10	cadherin 10, type 2 (T2-cadherin)	1008	5p14-p13
216177_at	0.679806	1.5424	LOC391132	2.26888	XR_017287 /// XR_018883 /// XR_038069		220166_at	NM_020348		Jun oncogene		220166_at	CNNM1	cyclin M1	26507	10q24.2
209646_x_at	0.704872	1.59723	ALDH1B1	2.26599	NM_000692		220266_s_at	NM_004235		glucosidase, beta, acid 3 (cytosolic)		220266_s_at	KLF4	Kruppel-like factor 4 (gut)	9314	9q31
216203_at	0.551457	1.24038	SPTLC2	2.24927	NM_004863		220475_at	NM_022127		hypothetical protein LOC100131637		220475_at	SLC28A3	solute carrier family 28 (sodium-coupled nucleoside transporter), member 3	64078	9q22.2
221659_s_at	0.824428	1.84874	MYLC2PL	2.24245	NM_138403		220545_s_at	NM_021733		---		220545_s_at	TSKS	testis-specific kinase substrate	60385	19q13.3
208551_at	0.736024	1.64763	HIST1H4G	2.23855	NM_003547		220682_s_at	---		S100 calcium binding protein A2		220682_s_at	---	---	---	---
218255_s_at	0.788074	1.76401	FBRS	2.23839	NM_001105079		220703_at	XR_039896 /// XR_039897 /// XR_039898		RAB2A, member RAS oncogene family		220703_at	C10orf110	chromosome 10 open reading frame 110	55853	10p15.3
206438_x_at	0.640054	1.42691	TCTN2	2.22935	NM_024809		220776_at	NM_013348 /// NM_170720		peptidylprolyl isomerase A (cyclophilin A)-like 4 /// peptidylprolyl isomerase A (cyclophilin A)-like /// similar to cyclophilin-LC (COAS2)		220776_at	KCNJ14	potassium inwardly-rectifying channel, subfamily J, member 14	3770	19q13
214421_x_at	0.804212	1.78704	CYP2C9	2.2221	NM_000771		221009_s_at	NM_001039667 /// NM_139314		fibroblast growth factor receptor 2 (bacteria-expressed kinase, keratinocyte growth factor receptor, craniofacial dysostosis 1, Crouzon syndrome, Pfeiffer syndrome, Jackson-Weiss syndrome)		221009_s_at	ANGPTL4	angiopoietin-like 4	51129	19p13.3
220475_at	0.613455	1.36261	SLC28A3	2.2212	NM_022127		221033_s_at	NM_031277		Ribosomal protein L38		221033_s_at	RNF17	ring finger protein 17	56163	13q12.12
211454_x_at	0.640436	1.42188	FKSG49	2.22018	XR_041698		221339_at	NM_013941		Phosphoglycerate kinase 1		221339_at	OR10C1	olfactory receptor, family 10, subfamily C, member 1	442194	6p22.1
206186_at	0.607431	1.34587	MPP3	2.21567	NM_001932 /// NR_003562		221394_at	NM_001033080 /// NM_014626		Myeloid cell leukemia sequence 1 (BCL2-related)		221394_at	TAAR2	trace amine associated receptor 2	9287	6q24
216372_at	0.57911	1.26804	---	2.18964	---		221444_at	NM_016945		Thioredoxin		221444_at	TAS2R16	taste receptor, type 2, member 16	50833	7q31.1-q31.3|7q31
207608_x_at	0.619275	1.35467	CYP1A2	2.1875	NM_000761		221659_s_at	NM_138403		tachykinin receptor 1		221659_s_at	MYLC2PL	myosin light chain 2, precursor lymphocyte-specific	93408	7q22.1
208578_at	0.726976	1.58935	SCN10A	2.18625	NM_006514		221815_at	NM_007011 /// NM_152924		ribosomal protein L38		221815_at	ABHD2	abhydrolase domain containing 2	11057	15q26.1
216959_x_at	0.566816	1.23431	NRCAM	2.17762	NM_001037132 /// NM_001037133 /// NM_005010		221841_s_at	NM_004235		amphiregulin (schwannoma-derived growth factor) /// similar to Amphiregulin precursor (AR) (Colorectum cell-derived growth factor) (CRDGF)		221841_s_at	KLF4	Kruppel-like factor 4 (gut)	9314	9q31
221394_at	0.592467	1.28266	TAAR2	2.16495	NM_001033080 /// NM_014626		221917_s_at	NM_001098477 /// NM_002092		---		221917_s_at	GRSF1	G-rich RNA sequence binding factor 1	2926	4q13
211364_at	0.729888	1.57609	MTAP	2.15936	NM_002451		221943_x_at	NM_000999 /// NM_001035258		CDNA: FLJ21700 fis, clone COL09849, highly similar to HSU14972 Human ribosomal protein S10 mRNA		221943_x_at	RPL38	Ribosomal protein L38	6169	17q23-q25
203735_x_at	0.6186	1.33227	PPFIBP1	2.15368	NM_003622 /// NM_177444		221960_s_at	NM_002865		---		221960_s_at	RAB2A	RAB2A, member RAS oncogene family	5862	8q12.1
205678_at	0.647351	1.39362	AP3B2	2.15281	NM_004644		221995_s_at	---		MRNA; cDNA DKFZp586E121 (from clone DKFZp586E121)		221995_s_at	---	---	---	---
210210_at	0.564818	1.21511	MPZL1	2.15133	NM_003953 /// NM_024569		222051_s_at	XM_001716033 /// XM_001716143 /// XM_001716209		interleukin 1, beta		222051_s_at	LOC100131637	hypothetical protein LOC100131637	100131637	8q21.2
210088_x_at	0.630066	1.3483	MYL4	2.13993	NM_001002841 /// NM_002476		222187_x_at	NM_005754 /// NM_198395		Ribosomal protein L37a		222187_x_at	G3BP1	GTPase activating protein (SH3 domain) binding protein 1	10146	5q33.1
217473_x_at	0.689006	1.47293	SLC11A1	2.13776	NM_000578		222329_x_at	---		interleukin 1, beta		222329_x_at	---	---	---	---
207919_at	0.633131	1.34946	ART1	2.13141	NM_004314		222370_x_at	---		---		222370_x_at	---	---	---	---
216034_at	0.771583	1.64142	ZNF280A	2.12734	NM_080740		32540_at	NM_005605		Ribosomal protein L27a		32540_at	PPP3CC	Protein phosphatase 3 (formerly 2B), catalytic subunit, gamma isoform	5533	8p21.3
217629_at	0.713016	1.51194	---	2.12048	---		39402_at	NM_000576		tyrosine kinase with immunoglobulin-like and EGF-like domains 1		39402_at	IL1B	interleukin 1, beta	3553	2q14
214087_s_at	0.71482	1.51018	MYBPC1	2.11267	NM_002465 /// NM_206819 /// NM_206820 /// NM_206821		AFFX-HUMRGE/M10098_3_at	---		angiopoietin-like 4		AFFX-HUMRGE/M10098_3_at	---	---	---	---
207765_s_at	0.609363	1.27917	KIAA1539	2.09919	NM_025182		AFFX-HUMRGE/M10098_5_at	---		---		AFFX-HUMRGE/M10098_5_at	---	---	---	---
210542_s_at	0.693251	1.45411	SLCO3A1	2.09752	NM_013272		AFFX-HUMRGE/M10098_M_at	---		---		AFFX-HUMRGE/M10098_M_at	---	---	---	---
216323_x_at	0.610568	1.27628	TUBA3C /// TUBA3D	2.09032	NM_006001 /// NM_080386		AFFX-M27830_5_at	---		---		AFFX-M27830_5_at	---	---	---	---
203504_s_at	0.66459	1.38416	ABCA1	2.08273	NM_005502		AFFX-M27830_M_at	---		---		AFFX-M27830_M_at	---	---	---	---
210086_at	0.891253	1.85485	HR	2.08117	NM_005144 /// NM_018411		AFFX-r2-Hs18SrRNA-3_s_at	---		---		AFFX-r2-Hs18SrRNA-3_s_at	---	---	---	---
214594_x_at	0.695465	1.42877	ATP8B1	2.0544	NM_005603		AFFX-r2-Hs18SrRNA-5_at	---		---		AFFX-r2-Hs18SrRNA-5_at	---	---	---	---
215372_x_at	0.851053	1.7422	---	2.04711	---		AFFX-r2-Hs18SrRNA-M_x_at	---		---		AFFX-r2-Hs18SrRNA-M_x_at	---	---	---	---
219025_at	0.700489	1.41125	CD248	2.01467	NM_020404		AFFX-r2-Hs28SrRNA-3_at	---		---		AFFX-r2-Hs28SrRNA-3_at	---	---	---	---
208104_s_at	0.823159	1.64683	TSC22D4	2.00062	NM_030935		AFFX-r2-Hs28SrRNA-M_at	---		---		AFFX-r2-Hs28SrRNA-M_at	---	---	---	---
Systematic	Normalized	Normalized			RefSeq Transcript ID		Probe Set ID	RefSeq Transcript ID

## Sheet: ROSI down 2
Treatment ()*	DMSO	Rosi	Gene Symbol	fold change					Gene Title		Gene Symbol	Gene Title
203352_at	1.95121	0.122585	ORC4L	15.9172	NM_002552		200005_at		nucleoporin 155kDa		EIF3D	eukaryotic translation initiation factor 3, subunit D
209463_s_at	1.33367	0.150306	TAF12	8.87302	NM_005644		200028_s_at		adenosine deaminase		STARD7	StAR-related lipid transfer (START) domain containing 7
205928_at	1.6054	0.199228	ZNF443	8.05809	NM_005815		200037_s_at		protein phosphatase 1B (formerly 2C), magnesium-dependent, beta isoform		CBX3 /// LOC653972	chromobox homolog 3 (HP1 gamma homolog, Drosophila) /// similar to chromobox homolog 3
221837_at	1.47905	0.18436	HIGD1A	8.02263	NM_032775		200040_at		mitochondrial carrier homolog 2 (C. elegans)		KHDRBS1	KH domain containing, RNA binding, signal transduction associated 1
220145_at	1.65453	0.209641	CYB5R2	7.89222	NM_001039580		200071_at		PRP6 pre-mRNA processing factor 6 homolog (S. cerevisiae)		SMNDC1	survival motor neuron domain containing 1
214331_at	1.75046	0.234476	DAZAP2	7.46539	NM_005726		200646_s_at		chromodomain protein, Y-like		NUCB1	nucleobindin 1
219658_at	2.42788	0.341099	STK32B	7.11781	NM_024754		200653_s_at		transcription factor 7-like 2 (T-cell specific, HMG-box)		CALM1 /// CALM2 /// CALM3	calmodulin 1 (phosphorylase kinase, delta) /// calmodulin 2 (phosphorylase kinase, delta) /// calmodulin 3 (phosphorylase kinase, delta)
204182_s_at	1.32721	0.199418	ZBTB43	6.65539	NM_014007		200684_s_at		KIAA0368		UBE2L3	ubiquitin-conjugating enzyme E2L 3
213268_at	1.69183	0.254565	CAMTA1	6.64597	NM_015215		200702_s_at		cullin 4B		DDX24	DEAD (Asp-Glu-Ala-Asp) box polypeptide 24
206685_at	1.22366	0.191932	HCG4	6.3755	NR_002139		200740_s_at		queuine tRNA-ribosyltransferase 1 (tRNA-guanine transglycosylase)		SUMO3	SMT3 suppressor of mif two 3 homolog 3 (S. cerevisiae)
208906_at	1.60436	0.25456	BSCL2 /// HNRNPUL2	6.3025	NM_001079559		200790_at		pitrilysin metallopeptidase 1		ODC1	ornithine decarboxylase 1
219211_at	1.34692	0.222631	SLC39A4	6.04999	NM_017414		200810_s_at		gem (nuclear organelle) associated protein 4		CIRBP	cold inducible RNA binding protein
207232_s_at	1.26332	0.210813	DZIP3	5.99258	NM_014648		200811_at		breast carcinoma amplified sequence 2		CIRBP	cold inducible RNA binding protein
218747_s_at	1.68221	0.281514	MSRB2	5.97557	NM_018009		200816_s_at		A kinase (PRKA) anchor protein 1		PAFAH1B1	platelet-activating factor acetylhydrolase, isoform Ib, alpha subunit 45kDa
221777_at	1.88068	0.324809	KLHL22	5.79013	NM_032848		200841_s_at		ubiquitin-conjugating enzyme E2L 3		EPRS	glutamyl-prolyl-tRNA synthetase
219311_at	1.50601	0.263837	MPP5	5.70811	NM_024899		200887_s_at		synaptotagmin binding, cytoplasmic RNA interacting protein		STAT1	signal transducer and activator of transcription 1, 91kDa
201961_s_at	1.7095	0.306344	RNF41	5.58031	NM_005785		200897_s_at		phosphoglycerate kinase 1		PALLD	palladin, cytoskeletal associated protein
221981_s_at	2.29369	0.416506	VRK3	5.50698	NM_030581		200907_s_at		protein phosphatase 3 (formerly 2B), catalytic subunit, alpha isoform		PALLD	palladin, cytoskeletal associated protein
209459_s_at	1.96963	0.367865	ABAT	5.35422	NM_000663		200927_s_at		hypothetical protein LOC100132532		RAB14	RAB14, member RAS oncogene family
208368_s_at	1.48798	0.279957	BRCA2	5.31502	NM_000059		200934_at		metallothionein 1X		DEK	DEK oncogene (DNA binding)
201330_at	3.17957	0.599994	RARS	5.29933	NM_002887		200943_at		Chromosome 19 open reading frame 2		HMGN1	high-mobility group nucleosome binding domain 1
210480_s_at	1.70926	0.323797	MYO6	5.2788	NM_004999		200969_at		Ras-related GTP binding D		SERP1	stress-associated endoplasmic reticulum protein 1
206373_at	2.02967	0.399555	ZIC1	5.07983	NM_003412		200973_s_at		non-SMC element 4 homolog A (S. cerevisiae)		TSPAN3	tetraspanin 3
205071_x_at	1.51366	0.299419	XRCC4	5.05534	NM_003401		200991_s_at		protein arginine methyltransferase 5		SNX17	sorting nexin 17
205174_s_at	3.51475	0.700851	QPCT	5.01498	NM_012413		200993_at		ADP-ribosyltransferase 3		IPO7	importin 7
214439_x_at	2.14144	0.429412	TFAP2B	4.9869	NM_004305		201001_s_at		ring finger and CHY zinc finger domain containing 1		TMEM189-UBE2V1 /// UBE2V1	ubiquitin-conjugating enzyme E2 variant 1 /// TMEM189-UBE2V1
205345_at	1.93032	0.38863	BARD1	4.96698	NM_000465		201013_s_at		RAP1, GTP-GDP dissociation stimulator 1		PAICS	phosphoribosylaminoimidazole carboxylase, phosphoribosylaminoimidazole succinocarboxamide synthetase
201534_s_at	1.74934	0.363315	UBL3	4.81493	NM_007106		201014_s_at		protein phosphatase 1, regulatory (inhibitor) subunit 7		PAICS	phosphoribosylaminoimidazole carboxylase, phosphoribosylaminoimidazole succinocarboxamide synthetase
220278_at	1.44448	0.300635	SPATA6	4.80476	NM_018039		201039_s_at		beaded filament structural protein 1, filensin		RAD23A	RAD23 homolog A (S. cerevisiae)
221566_s_at	1.87869	0.398217	KCNMA1	4.71776	NM_003946		201067_at		FYN oncogene related to SRC, FGR, YES		PSMC2	proteasome (prosome, macropain) 26S subunit, ATPase, 2
203222_s_at	1.7049	0.362387	TLE1	4.70463	NM_005077		201111_at		hexokinase 2		CSE1L	CSE1 chromosome segregation 1-like (yeast)
212061_at	1.2747	0.280514	SR140	4.54415	NM_001080415		201112_s_at		protein kinase C, zeta		CSE1L	CSE1 chromosome segregation 1-like (yeast)
207199_at	1.21823	0.277157	TERT	4.39544	NM_198253		201114_x_at		jumping translocation breakpoint		PSMA7	proteasome (prosome, macropain) subunit, alpha type, 7
204195_s_at	1.37948	0.318303	PKNOX1	4.33388	NM_004571		201120_s_at		podocalyxin-like		PGRMC1	progesterone receptor membrane component 1
218832_x_at	1.713	0.40339	TNFRSF21	4.24651	NM_004041		201129_at		proteasome (prosome, macropain) 26S subunit, non-ATPase, 4		SFRS7	splicing factor, arginine/serine-rich 7, 35kDa
209167_at	1.95757	0.469436	GPM6B	4.17003	NM_001001994		201164_s_at		eukaryotic translation initiation factor 4E nuclear import factor 1		PUM1	pumilio homolog 1 (Drosophila)
204300_at	1.75624	0.427162	PET112L	4.11141	NM_004564		201175_at		DCP2 decapping enzyme homolog (S. cerevisiae)		TXNDC14	thioredoxin domain containing 14
204695_at	2.10303	0.514166	CDC25A	4.09017	NM_001789		201181_at		PDZ binding kinase		GNAI3	guanine nucleotide binding protein (G protein), alpha inhibiting activity polypeptide 3
205031_at	1.30773	0.327175	EFNB3	3.99704	NM_001406		201202_at		epidermal growth factor receptor pathway substrate 8		PCNA	proliferating cell nuclear antigen
221142_s_at	1.36947	0.345063	ZCCHC10	3.96876	NM_018441		201218_at		endosulfine alpha		CTBP2	C-terminal binding protein 2
205961_s_at	1.57865	0.402587	PSIP1	3.92126	NM_021144		201219_at		Fanconi anemia, complementation group I		CTBP2	C-terminal binding protein 2
201067_at	1.68452	0.439307	PSMC2	3.83449	NM_002803		201240_s_at		RuvB-like 1 (E. coli)		SPCS2	signal peptidase complex subunit 2 homolog (S. cerevisiae)
219493_at	1.85746	0.485185	RAD54B	3.82835	NM_024745		201242_s_at		LIM and calponin homology domains 1		ATP1B1	ATPase, Na+/K+ transporting, beta 1 polypeptide
213896_x_at	1.41566	0.374713	ATP5S	3.77798	XM_001721910		201267_s_at		NEDD8 activating enzyme E1 subunit 1		PSMC3	proteasome (prosome, macropain) 26S subunit, ATPase, 3
209170_s_at	1.77467	0.470042	GPM6B	3.77556	NM_001001994		201277_s_at		WD repeat and HMG-box DNA binding protein 1		HNRNPAB	heterogeneous nuclear ribonucleoprotein A/B
209527_at	1.68203	0.446479	EXOSC2	3.76731	NM_014285		201291_s_at		cell division cycle 2, G1 to S and G2 to M		TOP2A	topoisomerase (DNA) II alpha 170kDa
203708_at	1.50641	0.401575	PDE4B	3.75125	NM_001037339		201296_s_at		ATPase, H+ transporting, lysosomal 31kDa, V1 subunit E1		WSB1	WD repeat and SOCS box-containing 1
203212_s_at	1.46966	0.394044	MTMR2	3.7297	NM_016156		201302_at		FtsJ homolog 2 (E. coli)		ANXA4	annexin A4
204633_s_at	1.79219	0.480876	RPS6KA5	3.72692	NM_004755		201306_s_at		inositol polyphosphate-5-phosphatase F		ANP32B	acidic (leucine-rich) nuclear phosphoprotein 32 family, member B
211833_s_at	1.96114	0.536196	BAX	3.6575	NM_004324		201316_at		stress-associated endoplasmic reticulum protein 1		PSMA2	proteasome (prosome, macropain) subunit, alpha type, 2
201440_at	1.23809	0.341679	DDX23	3.62355	NM_004818		201330_at		ets variant gene 5 (ets-related molecule)		RARS	arginyl-tRNA synthetase
205227_at	2.62581	0.729166	IL1RAP	3.60112	NM_002182		201345_s_at		protein phosphatase 1, regulatory (inhibitor) subunit 8		UBE2D2	ubiquitin-conjugating enzyme E2D 2 (UBC4/5 homolog, yeast)
205882_x_at	1.28516	0.357344	ADD3	3.59642	NM_001121		201362_at		coiled-coil domain containing 53		IVNS1ABP	influenza virus NS1A binding protein
205240_at	1.43891	0.402166	GPSM2	3.57791	NM_013296		201363_s_at		survival of motor neuron protein interacting protein 1		IVNS1ABP	influenza virus NS1A binding protein
203532_x_at	2.46909	0.691532	CUL5	3.57046	NM_003478		201377_at		serine carboxypeptidase 1		UBAP2L	ubiquitin associated protein 2-like
217977_at	1.63314	0.461422	PHLDA1	3.53936	NM_016332		201391_at		putative homeodomain transcription factor 2		TRAP1	TNF receptor-associated protein 1
201753_s_at	1.54419	0.438236	ADD3	3.52366	NM_001121		201397_at		centrosomal protein 57kDa		PHGDH	phosphoglycerate dehydrogenase
221270_s_at	1.54216	0.437857	ITFG1	3.52205	NM_031209		201415_at		SWI/SNF related, matrix associated, actin dependent regulator of chromatin, subfamily d, member 2		GSS	glutathione synthetase
203285_s_at	1.35611	0.388182	HS2ST1	3.49348	NM_012262		201417_at		DEAH (Asp-Glu-Ala-His) box polypeptide 9		SOX4	SRY (sex determining region Y)-box 4
214492_at	2.57757	0.751794	H2AFY	3.42856	NM_000337		201440_at		chromatin modifying protein 5		DDX23	DEAD (Asp-Glu-Ala-Asp) box polypeptide 23
213606_s_at	1.24955	0.365421	KLHL23	3.41948	NM_004309		201456_s_at		thioredoxin domain containing 13		BUB3	BUB3 budding uninhibited by benzimidazoles 3 homolog (yeast)
204146_at	1.63185	0.478914	RAD51AP1	3.40741	NM_006479		201458_s_at		tropomyosin 1 (alpha)		BUB3	BUB3 budding uninhibited by benzimidazoles 3 homolog (yeast)
218875_s_at	1.52508	0.447602	MLF1IP	3.40722	NM_012177		201472_at		cyclin-dependent kinase 4		VBP1	von Hippel-Lindau binding protein 1
212745_s_at	1.62954	0.48042	BBS4	3.39191	NM_033028		201476_s_at		insulin-like growth factor 2 mRNA binding protein 3 /// similar to putative RNA binding protein KOC		RRM1	ribonucleotide reductase M1
215691_x_at	2.2883	0.677224	TSC2	3.37893	NM_016126		201477_s_at		phospholipid scramblase 4		RRM1	ribonucleotide reductase M1
219242_at	1.4982	0.444086	GALNT14	3.37366	NM_001042383		201504_s_at		parvin, beta		TSN	translin
201242_s_at	1.82798	0.544966	ATP1B1	3.3543	NM_001001787		201512_s_at		kelch-like 7 (Drosophila)		TOMM70A	translocase of outer mitochondrial membrane 70 homolog A (S. cerevisiae)
203917_at	1.7291	0.517366	CXADR	3.34212	NM_001338		201515_s_at		nuclear factor of activated T-cells, cytoplasmic, calcineurin-dependent 2 interacting protein		TSN	translin
209953_s_at	1.67816	0.502748	CDC37	3.33797	NM_007065		201528_at		SHC SH2-domain binding protein 1		RPA1	replication protein A1, 70kDa
218988_at	1.57289	0.472007	DSCC1	3.33235	NM_018656		201532_at		dehydrogenase/reductase (SDR family) member 7		PSMA3	proteasome (prosome, macropain) subunit, alpha type, 3
214500_at	1.52957	0.459907	EYA1	3.32582	NM_001040158		201534_s_at		KIAA0372		UBL3	ubiquitin-like 3
203243_s_at	1.8955	0.57169	PDLIM5	3.3156	NM_001011513		201535_at		ataxia telangiectasia and Rad3 related		UBL3	ubiquitin-like 3
205264_at	1.51589	0.458529	CD3EAP	3.30599	NM_012099		201569_s_at		zinc finger CCCH-type containing 13		LOC100131861 /// SAMM50	sorting and assembly machinery component 50 homolog (S. cerevisiae) /// hypothetical protein LOC100131861
203883_s_at	1.32625	0.401479	RAB11FIP2	3.30341	NM_014904		201578_at		acidic (leucine-rich) nuclear phosphoprotein 32 family, member B		PODXL	podocalyxin-like
211566_x_at	1.48642	0.450224	BRE	3.3015	NM_004899		201581_at		chromosome 14 open reading frame 108		TXNDC13	thioredoxin domain containing 13
201671_x_at	1.5122	0.460107	USP14	3.28663	NM_001037334		201582_at		cytochrome P450, family 27, subfamily A, polypeptide 1		SEC23B	Sec23 homolog B (S. cerevisiae)
206544_x_at	1.37223	0.419272	SMARCA2	3.27288	NM_003070 /// NM_139045		201593_s_at		IMP3, U3 small nucleolar ribonucleoprotein, homolog (yeast)		ZC3H15	zinc finger CCCH-type containing 15
205613_at	1.51801	0.464302	SYT17	3.26945	NM_016524		201599_at		ARTC1 mRNA, complete sequence		OAT	ornithine aminotransferase (gyrate atrophy)
209932_s_at	1.66449	0.509455	DUT	3.2672	NM_001025248 /// NM_001025249 /// NM_001948		201614_s_at		sorting and assembly machinery component 50 homolog (S. cerevisiae) /// hypothetical protein LOC100131861		RUVBL1	RuvB-like 1 (E. coli)
219961_s_at	1.31412	0.403641	C1orf164	3.25566	NM_018474		201635_s_at		phosphatidylcholine transfer protein		FXR1	fragile X mental retardation, autosomal homolog 1
217916_s_at	1.40686	0.434843	PEF1	3.23532	NM_016623		201637_s_at		DEAD (Asp-Glu-Ala-Asp) box polypeptide 47		FXR1	fragile X mental retardation, autosomal homolog 1
218244_at	1.6139	0.499083	FAM111A	3.23374	NM_017948		201647_s_at		platelet-activating factor acetylhydrolase, isoform Ib, alpha subunit 45kDa		SCARB2	scavenger receptor class B, member 2
214475_x_at	1.25721	0.388851	SGCD	3.23314	NM_000070 /// NM_024344 /// NM_173087 /// NM_173088 /// NM_173089 /// NM_173090 /// NM_212464 /// NM_212465 /// NM_212467		201664_at		NGFI-A binding protein 1 (EGR1 binding protein 1)		SMC4	structural maintenance of chromosomes 4
222250_s_at	1.54904	0.479157	WHSC2	3.23284	NM_015434		201671_x_at		transformation/transcription domain-associated protein		USP14	ubiquitin specific peptidase 14 (tRNA-guanine transglycosylase)
209631_s_at	1.2945	0.401269	GPR37	3.22602	NM_005302		201674_s_at		eukaryotic translation initiation factor 3, subunit D		AKAP1	A kinase (PRKA) anchor protein 1
209055_s_at	1.70472	0.530873	CDC5L	3.21117	NM_001253		201682_at		gelsolin (amyloidosis, Finnish type)		PMPCB	peptidase (mitochondrial processing) beta
221524_s_at	1.40963	0.439921	COX15	3.20428	NM_021244		201714_at		nudix (nucleoside diphosphate linked moiety X)-type motif 21		TUBG1	tubulin, gamma 1
221896_s_at	1.52196	0.475021	GLRX5	3.20399	NM_001099668 /// NM_001099669 /// NM_014056		201722_s_at		v-yes-1 Yamaguchi sarcoma viral related oncogene homolog		GALNT1	UDP-N-acetyl-alpha-D-galactosamine:polypeptide N-acetylgalactosaminyltransferase 1 (GalNAc-T1)
204274_at	1.73203	0.541534	EBAG9	3.19838	NM_004215 /// NM_198120		201737_s_at		mitogen-activated protein kinase kinase kinase 4		2008-03-06	membrane-associated ring finger (C3HC4) 6
201779_s_at	1.56659	0.491753	RNF13	3.18573	NM_007282 /// NM_183381 /// NM_183383 /// NM_183384		201752_s_at		phosphoserine aminotransferase 1		ADD3	adducin 3 (gamma)
221727_at	1.44096	0.452929	C12orf52	3.18142	NM_006713		201753_s_at		non-SMC condensin I complex, subunit G		ADD3	adducin 3 (gamma)
217945_at	1.42287	0.447459	CMTM6	3.17988	NM_001011885 /// NM_025238		201755_at		annexin A4		MCM5	minichromosome maintenance complex component 5
209337_at	1.59794	0.503243	PSIP1	3.17529	NM_021144 /// NM_033222		201756_at		ADP-ribosylation factor-like 3		RPA2	replication protein A2, 32kDa
204364_s_at	1.73913	0.548314	REEP1	3.17178	NM_022912		201758_at		sorting nexin 2		TSG101	tumor susceptibility gene 101
218885_s_at	1.39657	0.440409	NETO2	3.17109	NM_024642		201761_at		folate hydrolase (prostate-specific membrane antigen) 1		MTHFD2	methylenetetrahydrofolate dehydrogenase (NADP+ dependent) 2, methenyltetrahydrofolate cyclohydrolase
217640_x_at	1.60082	0.504859	SLC7A11	3.17082	NM_001039535 /// NM_145060		201764_at		WW domain binding protein 1 /// zinc finger, HIT type 4		TMEM106C	transmembrane protein 106C
202960_s_at	1.55922	0.49214	MUT	3.16825	NM_000255		201769_at		centromere protein N		CLINT1	clathrin interactor 1
219049_at	2.27365	0.71869	C8orf32	3.1636	NM_018371		201770_at		DEAD (Asp-Glu-Ala-Asp) box polypeptide 17		SNRPA	small nuclear ribonucleoprotein polypeptide A
218349_s_at	1.46819	0.4653	COMMD8	3.15535	NM_017975 /// NR_003105		201774_s_at		kinesin heavy chain member 2A		NCAPD2	non-SMC condensin I complex, subunit D2
204778_x_at	1.77941	0.566098	HOXB7	3.14329	NM_004502		201779_s_at		La ribonucleoprotein domain family, member 4		RNF13	ring finger protein 13
200907_s_at	2.26539	0.72092	PALLD	3.14236	NM_016081		201801_s_at		DiGeorge syndrome critical region gene 6 /// DiGeorge syndrome critical region gene 6-like		SLC29A1	solute carrier family 29 (nucleoside transporters), member 1
201635_s_at	1.62661	0.518051	FXR1	3.13987	NM_001013438 /// NM_001013439 /// NM_005087		201804_x_at		transcription factor AP-2 alpha (activating enhancer binding protein 2 alpha)		TBCB	tubulin folding cofactor B
203654_s_at	1.83139	0.585197	COIL	3.12953	NM_004645		201807_at		chromobox homolog 3 (HP1 gamma homolog, Drosophila) /// similar to chromobox homolog 3		VPS26A	vacuolar protein sorting 26 homolog A (S. pombe)
218542_at	1.44669	0.46228	MAFB	3.12948	NM_001127182 /// NM_018131		201827_at		NIMA (never in mitosis gene a)- related kinase 9		SMARCD2	SWI/SNF related, matrix associated, actin dependent regulator of chromatin, subfamily d, member 2
218741_at	1.71713	0.550454	TAPBPL	3.11948	NM_001002876 /// NM_001110215 /// NM_024053		201830_s_at		proteasome (prosome, macropain) 26S subunit, ATPase, 5		NET1	neuroepithelial cell transforming gene 1
200841_s_at	1.503	0.483007	EPRS	3.11176	NM_004446		201849_at		ring finger protein 113A		BNIP3	BCL2/adenovirus E1B 19kDa interacting protein 3
201890_at	1.8172	0.584344	RRM2	3.10981	NM_001034		201855_s_at		GA binding protein transcription factor, beta subunit 2		ATMIN	ATM interactor
201291_s_at	1.67223	0.539935	TOP2A	3.09709	NM_001067		201857_at		succinate dehydrogenase complex, subunit C, integral membrane protein, 15kDa		ZFR	zinc finger RNA binding protein
48808_at	2.55234	0.827299	---	3.08514	NM_000791		201890_at		transmembrane protein 97		RRM2	ribonucleotide reductase M2 polypeptide
208119_s_at	1.14575	0.371553	ZNF93	3.08369	NM_031218		201901_s_at		ribophorin II		YY1	YY1 transcription factor
209566_at	1.24975	0.405733	INSIG2	3.08022	NM_016133		201929_s_at		clathrin, light chain (Lcb)		PKP4	plakophilin 4
202903_at	2.13131	0.692253	LSM5	3.07879	NM_012322		201959_s_at		structural maintenance of chromosomes 2		MYCBP2	MYC binding protein 2
212645_x_at	1.58392	0.514632	BRE	3.07777	NM_004899 /// NM_199191 /// NM_199192 /// NM_199193 /// NM_199194		201961_s_at		protein regulator of cytokinesis 1		RNF41	ring finger protein 41
219525_at	1.49317	0.485364	GEMIN6	3.07638	NM_018242		201970_s_at		solute carrier family 47, member 1		NASP	nuclear autoantigenic sperm protein (histone-binding)
218957_s_at	1.47495	0.479479	RMI1	3.07615	NM_025155		202020_s_at		core-binding factor, beta subunit		LANCL1	LanC lantibiotic synthetase component C-like 1 (bacterial)
212533_at	1.52447	0.496203	WEE1	3.07227	NM_003390		202052_s_at		ubiquitin-conjugating enzyme E2K (UBC1 homolog, yeast)		RAI14	retinoic acid induced 14
209917_s_at	1.05719	0.344477	TP53AP1	3.06898	NM_007233 /// NR_015381		202088_at		B9 protein domain 1		SLC39A6	solute carrier family 39 (zinc transporter), member 6
217731_s_at	1.81845	0.593106	EIF2AK1	3.06598	NM_021999		202089_s_at		ATP-binding cassette, sub-family B (MDR/TAP), member 7		SLC39A6	solute carrier family 39 (zinc transporter), member 6
215509_s_at	1.22925	0.401167	PYGO1	3.06418	NM_004336		202095_s_at		Sec23 homolog B (S. cerevisiae)		BIRC5	baculoviral IAP repeat-containing 5 (survivin)
209715_at	1.75089	0.572106	CBX5	3.06042	NM_012117		202107_s_at		X-ray repair complementing defective repair in Chinese hamster cells 5 (double-strand-break rejoining; Ku autoantigen, 80kDa)		MCM2	minichromosome maintenance complex component 2
202173_s_at	1.47153	0.481313	VEZF1	3.05734	NM_007146		202113_s_at		intraflagellar transport 122 homolog (Chlamydomonas)		SNX2	sorting nexin 2
212045_at	1.59529	0.523262	GLG1	3.04874	NM_012201		202130_at		ubiquinol-cytochrome c reductase binding protein		RIOK3	RIO kinase 3 (yeast)
213664_at	1.46916	0.485503	C12orf29	3.02605	NM_004170		202149_at		THAP domain containing 10		NEDD9	neural precursor cell expressed, developmentally down-regulated 9
208753_s_at	1.61621	0.535404	NAP1L1	3.01868	NM_004537 /// NM_139207		202153_s_at		mitochondrial ribosomal protein L35		NUP62	nucleoporin 62kDa
210233_at	1.82248	0.605048	IL1RAP	3.01213	NM_002182 /// NM_134470		202156_s_at		nucleolar protein 8		CUGBP2	CUG triplet repeat, RNA binding protein 2
203537_at	1.73316	0.575677	PRPSAP2	3.01066	NM_002767		202157_s_at		bridging integrator 1		CUGBP2	CUG triplet repeat, RNA binding protein 2
201397_at	1.72856	0.57433	PHGDH	3.0097	NM_006623		202158_s_at		zinc finger protein 148		CUGBP2	CUG triplet repeat, RNA binding protein 2
210239_at	1.90376	0.633201	IRX5	3.00656	NM_005853		202173_s_at		UDP glycosyltransferase 8 (UDP-galactose ceramide galactosyltransferase)		VEZF1	vascular endothelial zinc finger 1
212675_s_at	1.64931	0.548736	CEP68	3.00566	NM_015147		202178_at		dicarbonyl/L-xylulose reductase		PRKCZ	protein kinase C, zeta
209478_at	1.80405	0.601788	STRA13	2.99782	NM_144998		202188_at		chromosome 1 open reading frame 41		NUP93	nucleoporin 93kDa
202257_s_at	1.38314	0.462415	CD2BP2	2.99111	NM_006110		202214_s_at		glycine cleavage system protein H (aminomethyl carrier) /// similar to Glycine cleavage system H protein, mitochondrial		CUL4B	cullin 4B
209031_at	1.98917	0.666673	CADM1	2.98372	NM_001098517 /// NM_014333		202240_at		processing of precursor 5, ribonuclease P/MRP subunit (S. cerevisiae)		PLK1	polo-like kinase 1 (Drosophila)
205662_at	1.4885	0.502023	B9D1	2.96501	NM_015681		202246_s_at		nuclear receptor subfamily 3, group C, member 1 (glucocorticoid receptor)		CDK4	cyclin-dependent kinase 4
220633_s_at	1.27995	0.432773	MCM10	2.95755	NM_016287		202257_s_at		glutathione synthetase		CD2BP2	CD2 (cytoplasmic tail) binding protein 2
219703_at	1.84748	0.624744	HEY2	2.95718	NM_018365		202266_at		polymerase (RNA) II (DNA directed) polypeptide I, 14.5kDa		TTRAP	TRAF and TNF receptor associated protein
203102_s_at	1.54322	0.522274	MGAT2	2.95481	NM_002408		202268_s_at		oxoglutarate dehydrogenase-like		NAE1	NEDD8 activating enzyme E1 subunit 1
205168_at	1.68482	0.571604	DDR2	2.94754	NM_001014796 /// NM_006182		202276_at		pentatricopeptide repeat domain 2		SHFM1	split hand/foot malformation (ectrodactyly) type 1
203548_s_at	1.64155	0.557625	LPL	2.94382	NM_000237		202294_at		nuclear cap binding protein subunit 1, 80kDa		STAG1	stromal antigen 1
201855_s_at	1.26538	0.429961	ATMIN	2.94301	NM_015251		202336_s_at		chondroitin sulfate N-acetylgalactosaminyltransferase 1		PAM	peptidylglycine alpha-amidating monooxygenase
212677_s_at	1.85698	0.632009	CEP68	2.93822	NM_015147		202347_s_at		eukaryotic translation initiation factor 3, subunit C /// eukaryotic translation initiation factor 3, subunit C-like		UBE2K	ubiquitin-conjugating enzyme E2K (UBC1 homolog, yeast)
203017_s_at	1.30477	0.444277	SSX2IP	2.93684	NM_014021		202364_at		peptidylprolyl isomerase domain and WD repeat containing 1		MXI1	MAX interactor 1
209033_s_at	1.28275	0.43679	DYRK1A	2.93675	NM_001396 /// NM_101395 /// NM_130436 /// NM_130437 /// NM_130438		202370_s_at		phosphatidylinositol binding clathrin assembly protein		CBFB	core-binding factor, beta subunit
213537_at	1.2675	0.432029	ALDH7A1	2.93384	NM_033554		202371_at		mature T-cell proliferation 1 /// similar to mature T-cell proliferations 1		TCEAL4	transcription elongation factor A (SII)-like 4
212996_s_at	1.27031	0.433077	URB1	2.93323	---		202372_at		Vac14 homolog (S. cerevisiae) /// hypothetical protein LOC100130369		RAB3GAP2	RAB3 GTPase activating protein subunit 2 (non-catalytic)
204092_s_at	1.62843	0.5558	AURKA	2.92988	NM_003600 /// NM_198433 /// NM_198434 /// NM_198435 /// NM_198436 /// NM_198437		202412_s_at		interferon induced with helicase C domain 1		USP1	ubiquitin specific peptidase 1
209040_s_at	1.678	0.57297	PSMB8	2.9286	NM_004159 /// NM_148919		202413_s_at		forkhead box O3		USP1	ubiquitin specific peptidase 1
219306_at	1.6495	0.563254	CEP76	2.92852	NM_020242		202429_s_at		N-acetyltransferase 10		PPP3CA	protein phosphatase 3 (formerly 2B), catalytic subunit, alpha isoform
203114_at	1.49365	0.511394	SSSCA1	2.92075	NM_006396		202446_s_at		heat shock 70kDa protein 4		PLSCR1	phospholipid scramblase 1
221251_x_at	1.88673	0.64607	KIF18A	2.92031	NM_012477 /// NM_031288		202451_at		centrosomal protein 63kDa		GTF2H1	general transcription factor IIH, polypeptide 1, 62kDa
213322_at	1.6079	0.55077	C6orf130	2.91937	NM_145063		202467_s_at		heterogeneous nuclear ribonucleoprotein A3		COPS2	COP9 constitutive photomorphogenic homolog subunit 2 (Arabidopsis)
201039_s_at	1.6801	0.575903	RAD23A	2.91734	NM_005053		202470_s_at		peroxisomal membrane protein 3, 35kDa (Zellweger syndrome)		CPSF6	cleavage and polyadenylation specific factor 6, 68kDa
204026_s_at	1.78716	0.612855	ZWINT	2.91613	NM_001005413 /// NM_007057 /// NM_032997		202514_at		mitogen-activated protein kinase 1 interacting protein 1-like		DLG1	discs, large homolog 1 (Drosophila)
217853_at	1.43511	0.492394	POLR2E	2.91456	NM_022748		202534_x_at		SP100 nuclear antigen		DHFR	dihydrofolate reductase
202157_s_at	2.21672	0.761109	CUGBP2	2.91249	NM_001025076 /// NM_001025077 /// NM_001083591 /// NM_006561		202557_at		six transmembrane epithelial antigen of the prostate 1		STCH	stress 70 protein chaperone, microsome-associated, 60kDa
212593_s_at	1.63182	0.560409	PDCD4	2.91184	NM_014456 /// NM_145341		202562_s_at		replication factor C (activator 1) 3, 38kDa		C14orf1	chromosome 14 open reading frame 1
216100_s_at	1.76564	0.608614	TBCB	2.90109	NM_015602		202567_at		nucleolar and spindle associated protein 1		SNRPD3	small nuclear ribonucleoprotein D3 polypeptide 18kDa
209662_at	1.32778	0.457823	CETN3	2.9002	NM_004365		202580_x_at		guanine nucleotide binding protein (G protein), alpha inhibiting activity polypeptide 3		FOXM1	forkhead box M1
218643_s_at	1.3489	0.465841	SLC25A15	2.89563	NM_014171		202609_at		RNA binding motif protein 22		EPS8	epidermal growth factor receptor pathway substrate 8
209621_s_at	1.73217	0.59827	PDLIM3	2.89529	NM_001114107 /// NM_014476		202614_at		aldehyde dehydrogenase 7 family, member A1		SLC30A9	solute carrier family 30 (zinc transporter), member 9
202266_at	1.35694	0.46901	TTRAP	2.8932	NM_016614		202620_s_at		mitogen-activated protein kinase 6		PLOD2	procollagen-lysine, 2-oxoglutarate 5-dioxygenase 2
201849_at	1.65053	0.570957	BNIP3	2.89082	NM_004052		202626_s_at		M-phase phosphoprotein 8		LYN	v-yes-1 Yamaguchi sarcoma viral related oncogene homolog
201476_s_at	1.50569	0.521496	RRM1	2.88725	NM_001033		202629_at		polypyrimidine tract binding protein 1		APPBP2	amyloid beta precursor protein (cytoplasmic tail) binding protein 2
218185_s_at	1.60264	0.55549	LMBRD1	2.88509	NM_018120		202633_at		hydroxysteroid (17-beta) dehydrogenase 12		TOPBP1	topoisomerase (DNA) II binding protein 1
209425_at	1.88314	0.653078	AMACR /// C1QTNF3	2.88349	NM_014324 /// NM_030945 /// NM_181435 /// NM_203382		202641_at		xylosyltransferase I		ARL3	ADP-ribosylation factor-like 3
204126_s_at	1.86702	0.648098	CDC45L	2.88076	NM_003504		202642_s_at		HUS1 checkpoint homolog (S. pombe)		TRRAP	transformation/transcription domain-associated protein
203964_at	1.56904	0.545355	NMI	2.8771	NM_004688		202651_at		COMM domain containing 4		LPGAT1	lysophosphatidylglycerol acyltransferase 1
201202_at	1.55561	0.542671	PCNA	2.86658	NM_002592 /// NM_182649		202697_at		AT rich interactive domain 1A (SWI-like)		NUDT21	nudix (nucleoside diphosphate linked moiety X)-type motif 21
219067_s_at	1.77427	0.619835	RNF141	2.86249	NM_017615		202730_s_at		brix domain containing 5		PDCD4	programmed cell death 4 (neoplastic transformation inhibitor)
209234_at	1.5091	0.527925	KIF1B	2.85854	NM_015074 /// NM_183416		202737_s_at		TROVE domain family, member 2		LSM4	LSM4 homolog, U6 small nuclear RNA associated (S. cerevisiae)
215616_s_at	1.54737	0.544076	DLEU2 /// DLEU2L	2.84402	NM_015015		202743_at		metallothionein 1F		PIK3R3	phosphoinositide-3-kinase, regulatory subunit 3 (gamma)
202470_s_at	1.46665	0.51575	CPSF6	2.84372	NM_007007		202797_at		ribonucleotide reductase M1		SACM1L	SAC1 suppressor of actin mutations 1-like (yeast)
220651_s_at	1.66661	0.587237	MRTO4	2.83805	NM_018518 /// NM_182751		202846_s_at		F-box and WD repeat domain containing 2		PIGC	phosphatidylinositol glycan anchor biosynthesis, class C
212105_s_at	1.39713	0.494561	DHX9	2.82499	NM_001357		202850_at		stromal antigen 1		ABCD3	ATP-binding cassette, sub-family D (ALD), member 3
219743_at	1.89897	0.672695	IPP	2.82294	NM_012259		202864_s_at		transcription factor Dp-2 (E2F dimerization partner 2)		SP100	SP100 nuclear antigen
201363_s_at	1.49697	0.530288	IVNS1ABP	2.82293	NM_006469		202903_at		splicing factor 3a, subunit 1, 120kDa		LSM5	LSM5 homolog, U6 small nuclear RNA associated (S. cerevisiae)
211023_at	1.39683	0.494906	PDHB	2.82241	NM_000925		202909_at		TRAF3 interacting protein 2		EPM2AIP1	EPM2A (laforin) interacting protein 1
205047_s_at	1.59665	0.565862	ASNS	2.82163	NM_001673 /// NM_133436 /// NM_183356		202932_at		histone cluster 2, H2aa3 /// histone cluster 2, H2aa4		YES1	v-yes-1 Yamaguchi sarcoma viral oncogene homolog 1
209709_s_at	1.34827	0.477863	HMMR	2.82146	NM_012484 /// NM_012485		202944_at		zuotin related factor 1		NAGA	N-acetylgalactosaminidase, alpha-
221867_at	1.4876	0.527989	SEH1L	2.81748	NM_153029		202959_at		RAB27A, member RAS oncogene family		MUT	methylmalonyl Coenzyme A mutase
205808_at	1.49882	0.532577	ASPH	2.81429	NM_004318 /// NM_020164 /// NM_032466 /// NM_032467 /// NM_032468		202960_s_at		phosphoribosylaminoimidazole carboxylase, phosphoribosylaminoimidazole succinocarboxamide synthetase		MUT	methylmalonyl Coenzyme A mutase
207831_x_at	1.57205	0.559204	DHPS	2.81123	NM_001930 /// NM_013406 /// NM_013407		202967_at		glutathione synthetase		GSTA4	glutathione S-transferase A4
216237_s_at	1.89652	0.675528	TCEA1	2.80746	NM_006739		203017_s_at		transmembrane protein 14A		SSX2IP	synovial sarcoma, X breakpoint 2 interacting protein
220038_at	1.71708	0.61207	MFI2	2.80537	NM_001033578 /// NM_013257 /// NM_019607 /// NM_170709		203022_at		fibrillarin		RNASEH2A	ribonuclease H2, subunit A
204720_s_at	1.28211	0.45913	DNAJC6	2.79248	NM_014787		203033_x_at		CDNA: FLJ23070 fis, clone LNG05629		FH	fumarate hydratase
218169_at	1.41247	0.506019	ARMC1	2.79134	NM_018052 /// XM_001724197 /// XM_001724956 /// XM_001726731		203042_at		Cri-du-chat region mRNA, clone NIBB11		LAMP2	lysosomal-associated membrane protein 2
208808_s_at	1.54186	0.552618	HMGB2	2.7901	NM_002129		203048_s_at		solute carrier family 39 (zinc transporter), member 6		KIAA0372	KIAA0372
218930_s_at	1.37794	0.494343	QRSL1	2.78741	NM_018374		203053_at		scavenger receptor class B, member 2		BCAS2	breast carcinoma amplified sequence 2
204566_at	1.36247	0.489505	PPM1D	2.78336	NM_003620		203069_at		development and differentiation enhancing factor 2		SV2A	synaptic vesicle glycoprotein 2A
204441_s_at	1.69318	0.6097	POLA2	2.77707	NM_002689		203079_s_at		RIO kinase 3 (yeast)		CUL2	cullin 2
203306_s_at	1.28002	0.461569	SLC35A1	2.7732	NM_006416		203087_s_at		dihydrolipoamide branched chain transacylase E2		KIF2A	kinesin heavy chain member 2A
214083_at	1.1957	0.43132	LOC440434	2.77217	XM_001725096 /// XM_001726536		203095_at		cell division cycle 2, G1 to S and G2 to M		MTIF2	mitochondrial translational initiation factor 2
209790_s_at	1.65142	0.596128	CASP6	2.77024	NM_001226 /// NM_032992		203097_s_at		CDC5 cell division cycle 5-like (S. pombe)		RAPGEF2	Rap guanine nucleotide exchange factor (GEF) 2
220043_s_at	1.56861	0.566255	USP48	2.77015	NM_005929 /// NM_033316		203098_at		natural killer-tumor recognition sequence		CDYL	chromodomain protein, Y-like
218082_s_at	1.51918	0.548794	MRPL4	2.76821	NM_014517		203102_s_at		CDC42 effector protein (Rho GTPase binding) 3		MGAT2	mannosyl (alpha-1,6-)-glycoprotein beta-1,2-N-acetylglucosaminyltransferase
201682_at	1.35544	0.489779	PMPCB	2.76745	NM_004279		203103_s_at		mitochondrial translational initiation factor 2		PRPF19	PRP19/PSO4 pre-mRNA processing factor 19 homolog (S. cerevisiae)
203246_s_at	1.41967	0.513046	TUSC4	2.76715	NM_006545		203114_at		C-terminal binding protein 2		SSSCA1	Sjogren syndrome/scleroderma autoantigen 1
201722_s_at	1.32962	0.480906	GALNT1	2.76482	NM_020474		203148_s_at		phenylalanyl-tRNA synthetase, alpha subunit		TRIM14	tripartite motif-containing 14
201458_s_at	1.53997	0.557338	BUB3	2.76309	NM_001007793 /// NM_004725		203163_at		fragile X mental retardation, autosomal homolog 1		KATNB1	katanin p80 (WD repeat containing) subunit B 1
212943_at	1.20359	0.435609	KIAA0528	2.76302	NM_014802		203177_x_at		integrator complex subunit 9		TFAM	transcription factor A, mitochondrial
204091_at	1.43086	0.518122	PDE6D	2.76162	NM_002601		203195_s_at		adenylosuccinate lyase		NUP98	nucleoporin 98kDa
218228_s_at	1.30283	0.472212	POGK	2.75899	NM_025235		203200_s_at		tripartite motif-containing 37		MTRR	5-methyltetrahydrofolate-homocysteine methyltransferase reductase
205771_s_at	1.43045	0.518571	AKAP7	2.75845	NM_004842 /// NM_016377 /// NM_138633		203209_at		cold inducible RNA binding protein		RFC5	replication factor C (activator 1) 5, 36.5kDa
214722_at	1.41872	0.514499	RRP15	2.75747	NM_203458		203212_s_at		chromosome 19 open reading frame 62		MTMR2	myotubularin related protein 2
204875_s_at	1.75945	0.63903	GMDS	2.75332	NM_001500		203213_at		prolyl endopeptidase-like		CDC2	cell division cycle 2, G1 to S and G2 to M
213725_x_at	1.30793	0.475506	PRPF40A	2.7506	NM_022166		203214_x_at		aldehyde dehydrogenase 5 family, member A1 (succinate-semialdehyde dehydrogenase)		CDC2	cell division cycle 2, G1 to S and G2 to M
204453_at	1.7259	0.627504	ZNF84	2.75041	NM_003428		203222_s_at		adaptor-related protein complex 1, sigma 2 subunit		TLE1	transducin-like enhancer of split 1 (E(sp1) homolog, Drosophila)
204887_s_at	1.55299	0.565605	PLK4	2.74572	NM_014264		203243_s_at		transmembrane and coiled-coil domains 1		PDLIM5	PDZ and LIM domain 5
206102_at	1.62544	0.592411	GINS1	2.74378	NM_021067		203246_s_at		katanin p80 (WD repeat containing) subunit B 1		TUSC4	tumor suppressor candidate 4
219596_at	1.37688	0.501847	MREG	2.74363	NM_020147		203270_at		mitochondrial ribosomal protein S34		DTYMK /// LOC727761	deoxythymidylate kinase (thymidylate kinase) /// similar to Deoxythymidylate kinase (thymidylate kinase)
221932_s_at	1.63931	0.598678	GPR177	2.73821	NM_016417		203275_at		kinesin family member 18B		IRF2	interferon regulatory factor 2
204779_s_at	1.52137	0.555903	HOXB7	2.73675	NM_004502		203285_s_at		ubiquitin-conjugating enzyme E2 variant 1 /// TMEM189-UBE2V1		HS2ST1	heparan sulfate 2-O-sulfotransferase 1
204766_s_at	1.45647	0.533088	NUDT1	2.73214	NM_002452 /// NM_198948 /// NM_198949 /// NM_198950 /// NM_198952 /// NM_198953 /// NM_198954		203300_x_at		RD RNA binding protein		AP1S2	adaptor-related protein complex 1, sigma 2 subunit
211285_s_at	1.61789	0.594136	UBE3A	2.72309	NM_000462 /// NM_130838 /// NM_130839		203306_s_at		heterogeneous nuclear ribonucleoprotein H3 (2H9)		SLC35A1	solute carrier family 35 (CMP-sialic acid transporter), member A1
204285_s_at	1.53059	0.562087	PMAIP1	2.72305	NM_021127		203318_s_at		plakophilin 4		ZNF148	zinc finger protein 148
202620_s_at	1.52611	0.56099	PLOD2	2.72038	NM_000935 /// NM_182943		203333_at		chromosome 15 open reading frame 44		KIFAP3	kinesin-associated protein 3
209846_s_at	1.54026	0.567177	BTN3A2	2.71567	NM_007047		203334_at		phosphoribosyl pyrophosphate amidotransferase		DHX8	DEAH (Asp-Glu-Ala-His) box polypeptide 8
209306_s_at	1.26587	0.467053	SWAP70	2.71033	NM_015055		203344_s_at		SAC1 suppressor of actin mutations 1-like (yeast)		RBBP8	retinoblastoma binding protein 8
216228_s_at	1.41424	0.521886	MCM5	2.70987	NM_001008396 /// NM_007086		203348_s_at		calpain 3, (p94)		ETV5	ets variant gene 5 (ets-related molecule)
220129_at	1.52363	0.562252	MAP9	2.70986	NM_017826		203351_s_at		casein kinase 2, alpha 1 polypeptide		ORC4L	origin recognition complex, subunit 4-like (yeast)
201970_s_at	1.75488	0.648136	NASP	2.70757	NM_002482 /// NM_152298 /// NM_172164		203352_at		Smith-Magenis syndrome chromosome region, candidate 7-like		ORC4L	origin recognition complex, subunit 4-like (yeast)
202909_at	1.73993	0.643617	EPM2AIP1	2.70337	NM_014805		203409_at		F-box protein 21		DDB2	damage-specific DNA binding protein 2, 48kDa
202534_x_at	2.05411	0.760035	DHFR	2.70266	NM_000791		203418_at		transmembrane protein 41B		CCNA2	cyclin A2
214649_s_at	1.39996	0.518307	NOTCH2NL	2.70102	NM_016156 /// NM_201278 /// NM_201281		203432_at		solute carrier family 30 (zinc transporter), member 9		TMPO	thymopoietin
212746_s_at	1.31116	0.486112	CEP170	2.69723	NM_001042404 /// NM_001042405 /// NM_014812		203494_s_at		nucleoporin 85kDa		CEP57	centrosomal protein 57kDa
202514_at	1.37237	0.508953	DLG1	2.69646	NM_001098424 /// NM_004087		203532_x_at		MAX interactor 1		CUL5	cullin 5
204980_at	1.37271	0.509706	CLOCK	2.69315	NM_004898		203536_s_at		exosome component 7		CIAO1	cytosolic iron-sulfur protein assembly 1 homolog (S. cerevisiae)
201761_at	1.41606	0.52636	MTHFD2	2.69028	NM_001040409 /// NM_006636		203537_at		ribonuclease H2, subunit A		PRPSAP2	phosphoribosyl pyrophosphate synthetase-associated protein 2
208990_s_at	1.29725	0.482224	HNRNPH3	2.69014	NM_012207 /// NM_021644		203538_at		suppression of tumorigenicity 7		CAMLG	calcium modulating ligand
203103_s_at	1.61695	0.602065	PRPF19	2.68568	NM_014502		203548_s_at		CUG triplet repeat, RNA binding protein 2		LPL	lipoprotein lipase
220092_s_at	1.63265	0.608775	SOHLH2	2.68187	NM_018153 /// NM_032208 /// NM_053034		203560_at		protein tyrosine phosphatase-like (proline instead of catalytic arginine), member A		GGH	gamma-glutamyl hydrolase (conjugase, folylpolygammaglutamyl hydrolase)
201362_at	1.41751	0.528717	IVNS1ABP	2.68104	NM_006469		203588_s_at		pyrophosphatase (inorganic) 1		TFDP2	transcription factor Dp-2 (E2F dimerization partner 2)
206999_at	1.52319	0.569086	IL12RB2	2.67655	NM_001559		203607_at		succinate dehydrogenase complex, subunit C, integral membrane protein, 15kDa /// hCG1776980		INPP5F	inositol polyphosphate-5-phosphatase F
208886_at	1.51062	0.564465	H1F0	2.6762	NM_005318		203608_at		CSE1 chromosome segregation 1-like (yeast)		ALDH5A1	aldehyde dehydrogenase 5 family, member A1 (succinate-semialdehyde dehydrogenase)
219512_at	1.68597	0.630232	FJX1	2.67516	NM_024918		203625_x_at		RNA binding motif protein 10		SKP2	S-phase kinase-associated protein 2 (p45)
219843_at	1.39372	0.521074	---	2.67471	NM_005897		203654_s_at		family with sequence similarity 45, member B /// family with sequence similarity 45, member A		COIL	coilin
218559_s_at	1.67166	0.626966	AGK	2.66628	NM_005461		203680_at		glucosidase, beta; acid (includes glucosylceramidase) /// glucosidase, beta; acid, pseudogene		PRKAR2B	protein kinase, cAMP-dependent, regulatory, type II, beta
214321_at	2.05407	0.771668	TSFM	2.66186	NM_002514		203690_at		Rab geranylgeranyltransferase, beta subunit		TUBGCP3	tubulin, gamma complex associated protein 3
205681_at	1.86868	0.702036	BCL2A1	2.66181	NM_001114735 /// NM_004049		203708_at		modulator of apoptosis 1		PDE4B	phosphodiesterase 4B, cAMP-specific (phosphodiesterase E4 dunce homolog, Drosophila)
206081_at	1.42626	0.535902	SLC24A1	2.66142	NM_004727		203755_at		solute carrier family 1 (neuronal/epithelial high affinity glutamate transporter, system Xag), member 1		BUB1B	BUB1 budding uninhibited by benzimidazoles 1 homolog beta (yeast)
34225_at	1.28859	0.484494	SIDT2	2.65966	NM_005663		203764_at		Rap guanine nucleotide exchange factor (GEF) 5		DLG7	discs, large homolog 7 (Drosophila)
212766_s_at	1.49588	0.562894	ISG20L2	2.65748	NM_030980		203773_x_at		ornithine aminotransferase (gyrate atrophy)		BLVRA	biliverdin reductase A
203494_s_at	1.33512	0.503625	CEP57	2.65102	NM_014679		203803_at		aldehyde dehydrogenase 6 family, member A1		PCYOX1	prenylcysteine oxidase 1
213222_at	1.23376	0.465836	PLCB1	2.64847	NM_015192 /// NM_182734		203832_at		tumor susceptibility gene 101		SNRPF	small nuclear ribonucleoprotein polypeptide F
203773_x_at	1.48901	0.563063	BLVRA	2.64448	NM_000712		203856_at		ankyrin repeat domain 46		VRK1	vaccinia related kinase 1
213473_at	1.32126	0.500662	BRAP	2.63902	NM_006768		203883_s_at		vacuolar protein sorting 26 homolog A (S. pombe)		RAB11FIP2	RAB11 family interacting protein 2 (class I)
206364_at	1.47968	0.560835	KIF14	2.63836	NM_014875		203895_at		PRP4 pre-mRNA processing factor 4 homolog (yeast)		PLCB4	phospholipase C, beta 4
210997_at	1.4524	0.552265	HGF	2.6299	NM_000601 /// NM_001010931 /// NM_001010932 /// NM_001010933 /// NM_001010934		203917_at		tetraspanin 3		CXADR	coxsackie virus and adenovirus receptor
204019_s_at	1.32996	0.505751	SH3YL1	2.62966	NM_015677		203941_at		transferrin receptor (p90, CD71)		INTS9	integrator complex subunit 9
221558_s_at	1.85358	0.704886	NOL3	2.62962	NM_016269		203963_at		v-yes-1 Yamaguchi sarcoma viral oncogene homolog 1		CA12	carbonic anhydrase XII
202451_at	1.33303	0.506987	GTF2H1	2.62932	NM_005316		203964_at		sorting nexin 17		NMI	N-myc (and STAT) interactor
204827_s_at	1.50103	0.571739	CCNF	2.62538	NM_001761		203967_at		Wolf-Hirschhorn syndrome candidate 1		CDC6	cell division cycle 6 homolog (S. cerevisiae)
208748_s_at	1.05234	0.400883	FLOT1	2.62504	NM_005803		203968_s_at		solute carrier family 35 (UDP-N-acetylglucosamine (UDP-GlcNAc) transporter), member A3		CDC6	cell division cycle 6 homolog (S. cerevisiae)
202153_s_at	1.86146	0.709133	NUP62	2.62497	NM_012346 /// NM_016553 /// NM_153718 /// NM_153719		203976_s_at		DEP domain containing 6		CHAF1A	chromatin assembly factor 1, subunit A (p150)
211615_s_at	1.42332	0.542641	LRPPRC	2.62295	NM_133259		203979_at		nucleobindin 1		CYP27A1	cytochrome P450, family 27, subfamily A, polypeptide 1
200887_s_at	1.37033	0.523128	STAT1	2.6195	NM_007315 /// NM_139266		204004_at		poly(A) polymerase alpha		PAWR	PRKC, apoptosis, WT1, regulator
201515_s_at	1.29993	0.49644	TSN	2.6185	NM_004622		204019_s_at		fumarate hydratase		SH3YL1	SH3 domain containing, Ysc84-like 1 (S. cerevisiae)
205407_at	1.41651	0.54158	RECK	2.61552	NM_021111		204023_at		SEC23 interacting protein		RFC4	replication factor C (activator 1) 4, 37kDa
209773_s_at	1.58196	0.604905	RRM2	2.61523	NM_001034		204026_s_at		COP9 constitutive photomorphogenic homolog subunit 2 (Arabidopsis)		ZWINT	ZW10 interactor
218701_at	1.57472	0.602196	UTP6	2.61495	NM_016027		204091_at		G1 to S phase transition 1		PDE6D	phosphodiesterase 6D, cGMP-specific, rod, delta
210994_x_at	1.17789	0.450474	TRIM23	2.61478	NM_001656 /// NM_033227 /// NM_033228		204092_s_at		cytochrome P450, family 20, subfamily A, polypeptide 1		AURKA	aurora kinase A
212694_s_at	1.36701	0.523266	PCCB	2.61245	NM_000532		204126_s_at		peptidylprolyl isomerase G (cyclophilin G)		CDC45L	CDC45 cell division cycle 45-like (S. cerevisiae)
204354_at	1.24233	0.476141	POT1	2.60917	NM_001042594 /// NM_015450 /// NR_003102 /// NR_003103 /// NR_003104		204127_at		TAF5 RNA polymerase II, TATA box binding protein (TBP)-associated factor, 100kDa		RFC3	replication factor C (activator 1) 3, 38kDa
204709_s_at	1.53591	0.588936	KIF23	2.60794	NM_004856 /// NM_138555		204128_s_at		exportin 1 (CRM1 homolog, yeast)		RFC3	replication factor C (activator 1) 3, 38kDa
217221_x_at	1.36217	0.522361	HNRNPA3P2 /// NDRG3	2.60772	NM_005676 /// NM_152856		204146_at		chromosome 14 open reading frame 1		RAD51AP1	RAD51 associated protein 1
221931_s_at	1.36322	0.523019	RPUSD2	2.60645	NM_001013437 /// NM_031216		204162_at		phosphatidylinositol-3-phosphate/phosphatidylinositol 5-kinase, type III		NDC80	NDC80 homolog, kinetochore complex component (S. cerevisiae)
221711_s_at	1.59176	0.61076	SUB1	2.60619	NM_001033549 /// NM_014173		204182_s_at		cyclin-dependent kinase 8		ZBTB43	zinc finger and BTB domain containing 43
204973_at	1.81279	0.695772	GJB1	2.60544	NM_000166 /// NM_001097642		204195_s_at		ubiquitin-conjugating enzyme E2D 2 (UBC4/5 homolog, yeast)		PKNOX1	PBX/knotted 1 homeobox 1
219988_s_at	1.33718	0.513399	C8orf44 /// SGK3	2.60457	NM_018150		204216_s_at		carbonic anhydrase XII		ZC3H14	zinc finger CCCH-type containing 14
204873_at	1.61682	0.621121	PEX1	2.60307	NM_000466		204224_s_at		PRP40 pre-mRNA processing factor 40 homolog A (S. cerevisiae)		GCH1	GTP cyclohydrolase 1 (dopa-responsive dystonia)
202149_at	1.34762	0.518654	NEDD9	2.59831	NM_006403 /// NM_182966		204228_at		transcription elongation factor A (SII)-like 4		PPIH	peptidylprolyl isomerase H (cyclophilin H)
211890_x_at	1.26265	0.486121	CAPN3	2.59739	NM_000070 /// NM_024344 /// NM_173087 /// NM_173088 /// NM_173089 /// NM_173090 /// NM_212464 /// NM_212465 /// NM_212467		204238_s_at		deoxyuridine triphosphatase		C6orf108	chromosome 6 open reading frame 108
207124_s_at	1.45484	0.561223	GNB5	2.59227	NM_006578 /// NM_016194		204240_s_at		Zwilch, kinetochore associated, homolog (Drosophila)		SMC2	structural maintenance of chromosomes 2
204004_at	1.61077	0.621885	PAWR	2.59014	NM_002583		204247_s_at		casein kinase 2, alpha 1 polypeptide /// casein kinase 2, alpha 1 polypeptide pseudogene		CDK5	cyclin-dependent kinase 5
201769_at	1.31142	0.506434	CLINT1	2.58952	NM_014666		204254_s_at		BUB1 budding uninhibited by benzimidazoles 1 homolog (yeast)		VDR	vitamin D (1,25- dihydroxyvitamin D3) receptor
204238_s_at	1.51355	0.584605	C6orf108	2.58901	NM_006443 /// NM_199184		204256_at		N-6 adenine-specific DNA methyltransferase 1 (putative)		ELOVL6	ELOVL family member 6, elongation of long chain fatty acids (FEN1/Elo2, SUR4/Elo3-like, yeast)
204807_at	1.67486	0.6474	TMEM5	2.58706	NM_014254		204274_at		DEAH (Asp-Glu-Ala-His) box polypeptide 8		EBAG9	estrogen receptor binding site associated, antigen, 9
221618_s_at	1.31913	0.510085	ZDHHC11	2.58609	NM_015975 /// XM_001126120		204281_at		coronin, actin binding protein, 1C		TEAD4	TEA domain family member 4
204313_s_at	1.30482	0.504588	CREB1	2.58592	NM_004379 /// NM_134442		204285_s_at		mutS homolog 5 (E. coli) /// chromosome 6 open reading frame 26		PMAIP1	phorbol-12-myristate-13-acetate-induced protein 1
220239_at	1.38705	0.536456	JMJD2D	2.58558	NM_001031710 /// NM_018846		204290_s_at		sorting nexin 4		ALDH6A1	aldehyde dehydrogenase 6 family, member A1
201774_s_at	1.52253	0.58981	NCAPD2	2.58139	NM_014865		204295_at		mucin 7, secreted		SURF1	surfeit 1
211075_s_at	1.3473	0.522651	CD47	2.57781	NM_001025079 /// NM_001777 /// NM_198793		204300_at		solute carrier family 1 (glutamate/neutral amino acid transporter), member 4		PET112L	PET112-like (yeast)
203418_at	1.45521	0.564645	CCNA2	2.57721	NM_001237		204313_s_at		KIAA0240		CREB1	cAMP responsive element binding protein 1
207722_s_at	1.50393	0.583891	BTBD2	2.57571	NM_017797		204318_s_at		malonyl CoA:ACP acyltransferase (mitochondrial)		GTSE1	G-2 and S-phase expressed 1
208070_s_at	1.57402	0.611788	REV3L	2.57282	NM_002912		204326_x_at		microphthalmia-associated transcription factor		MT1X	metallothionein 1X
200934_at	1.75401	0.682087	DEK	2.57153	NM_003472		204332_s_at		replication factor C (activator 1) 3, 38kDa		AGA	aspartylglucosaminidase
205034_at	1.7167	0.667971	CCNE2	2.57003	NM_057749		204354_at		dehydrogenase/reductase (SDR family) member 7B		POT1	POT1 protection of telomeres 1 homolog (S. pombe)
215079_at	1.57364	0.612434	RBM10	2.56948	---		204364_s_at		family with sequence similarity 134, member A		REEP1	receptor accessory protein 1
205046_at	1.34795	0.525961	CENPE	2.56284	NM_001813		204369_at		proteasome (prosome, macropain) subunit, alpha type, 3		PIK3CA	phosphoinositide-3-kinase, catalytic, alpha polypeptide
219880_at	1.42728	0.55711	LOC100134295 /// SLCO4A1	2.56193	---		204386_s_at		ropporin, rhophilin associated protein 1 /// ropporin, rhophilin associated protein 1B		MRP63	mitochondrial ribosomal protein 63
212973_at	1.70915	0.667175	RPIA	2.56178	NM_144563		204396_s_at		cAMP responsive element binding protein 3		GRK5	G protein-coupled receptor kinase 5
210073_at	1.88322	0.735392	ST8SIA1	2.56084	NM_003034		204441_s_at		small nuclear ribonucleoprotein polypeptide A		POLA2	polymerase (DNA directed), alpha 2 (70kD subunit)
209759_s_at	1.54185	0.602244	DCI	2.56018	NM_001919		204453_at		KIAA0090		ZNF84	zinc finger protein 84
209377_s_at	1.39918	0.546543	HMGN3	2.56006	NM_004242 /// NM_138730		204460_s_at		family with sequence similarity 149, member B1		RAD1	RAD1 homolog (S. pombe)
212949_at	1.65238	0.645464	NCAPH	2.55999	NM_015341		204504_s_at		stress-induced-phosphoprotein 1 (Hsp70/Hsp90-organizing protein)		HIRIP3	HIRA interacting protein 3
215785_s_at	1.47816	0.577758	DOM3Z	2.55845	NM_001037332 /// NM_001037333 /// NM_014376		204566_at		gamma-glutamyl hydrolase (conjugase, folylpolygammaglutamyl hydrolase)		PPM1D	protein phosphatase 1D magnesium-dependent, delta isoform
208051_s_at	1.4997	0.586332	PAIP1	2.55777	NM_006451 /// NM_182789 /// NM_183323		204618_s_at		transmembrane protein 106B		GABPB2	GA binding protein transcription factor, beta subunit 2
218356_at	1.58702	0.620734	CRELD2	2.55668	NM_013393		204619_s_at		thymopoietin		VCAN	versican
207165_at	1.36109	0.532878	HMMR	2.55423	NM_012484 /// NM_012485		204630_s_at		ubiquitin-like 3		GOSR1	golgi SNAP receptor complex member 1
218462_at	1.37764	0.539504	TMEM33	2.55353	NM_025065		204633_s_at		methylmalonyl Coenzyme A mutase		RPS6KA5	ribosomal protein S6 kinase, 90kDa, polypeptide 5
217957_at	1.40673	0.550914	TOMM22	2.55345	NM_013242		204639_at		nuclear protein, ataxia-telangiectasia locus		ADA	adenosine deaminase
201804_x_at	1.61404	0.632405	TBCB	2.55222	NM_001281		204653_at		surfeit 1		TFAP2A	transcription factor AP-2 alpha (activating enhancer binding protein 2 alpha)
203270_at	1.5565	0.610166	DTYMK /// LOC727761	2.55095	NM_012145 /// XM_001126163 /// XM_001126184 /// XM_001126211		204681_s_at		transmembrane protein 194		RAPGEF5	Rap guanine nucleotide exchange factor (GEF) 5
201164_s_at	1.43593	0.563413	PUM1	2.54862	NM_001020658 /// NM_014676		204695_at		torsin A interacting protein 1		CDC25A	cell division cycle 25 homolog A (S. pombe)
208838_at	1.63563	0.642837	CAND1	2.54439	NM_018448		204709_s_at		kelch domain containing 3		KIF23	kinesin family member 23
218585_s_at	1.72491	0.67809	NUP37	2.54377	NM_016448		204720_s_at		frizzled homolog 5 (Drosophila)		DNAJC6	DnaJ (Hsp40) homolog, subfamily C, member 6
204396_s_at	1.50251	0.590753	GRK5	2.54338	NM_005308		204744_s_at		lysosomal-associated membrane protein 2		IARS	isoleucyl-tRNA synthetase
206167_s_at	1.7622	0.693064	ARHGAP6	2.54262	NM_001174 /// NM_006125 /// NM_013422 /// NM_013423 /// NM_013427		204766_s_at		serine/threonine/tyrosine interacting-like 1		NUDT1	nudix (nucleoside diphosphate linked moiety X)-type motif 1
204849_at	1.37051	0.539142	TCFL5	2.54202	NM_006602		204767_s_at		leucine rich repeat containing 40		FEN1	flap structure-specific endonuclease 1
203690_at	1.33598	0.525587	TUBGCP3	2.54187	NM_006322		204778_x_at		SERPINE1 mRNA binding protein 1		HOXB7	homeobox B7
212720_at	1.48214	0.583144	PAPOLA	2.54163	NM_032632		204779_s_at		O-sialoglycoprotein endopeptidase-like 1		HOXB7	homeobox B7
204504_s_at	1.56418	0.615916	HIRIP3	2.53961	NM_003609		204798_at		calpain 3, (p94)		MYB	v-myb myeloblastosis viral oncogene homolog (avian)
210793_s_at	1.67336	0.658912	NUP98	2.53959	NM_005387 /// NM_016320 /// NM_139131 /// NM_139132		204807_at		RAS guanyl releasing protein 1 (calcium and DAG-regulated)		TMEM5	transmembrane protein 5
203275_at	1.2443	0.489976	IRF2	2.53952	NM_002199		204808_s_at		aldehyde dehydrogenase 6 family, member A1		TMEM5	transmembrane protein 5
203755_at	1.4719	0.579973	BUB1B	2.53787	NM_001211		204822_at		H2A histone family, member V		TTK	TTK protein kinase
217403_s_at	1.24914	0.492202	RAP1GDS1	2.53787	NM_182490		204825_at		versican		MELK	maternal embryonic leucine zipper kinase
218053_at	1.39973	0.551703	WDR41	2.53711	NM_017892		204827_s_at		SMT3 suppressor of mif two 3 homolog 3 (S. cerevisiae)		CCNF	cyclin F
204290_s_at	1.6746	0.660145	ALDH6A1	2.53671	NM_005589		204831_at		phosphodiesterase 6D, cGMP-specific, rod, delta		CDK8	cyclin-dependent kinase 8
218351_at	1.8074	0.712869	TRAPPC2L	2.53538	NM_017845		204833_at		kelch domain containing 3		ATG12	ATG12 autophagy related 12 homolog (S. cerevisiae)
213008_at	1.43099	0.564651	FANCI	2.53429	NM_001113378 /// NM_018193		204835_at		chromosome 14 open reading frame 122		POLA1	polymerase (DNA directed), alpha 1
200702_s_at	1.41339	0.558404	DDX24	2.53113	NM_020414		204839_at		centromere protein M		POP5	processing of precursor 5, ribonuclease P/MRP subunit (S. cerevisiae)
212432_at	1.50733	0.59555	GRPEL1	2.53099	NM_025196		204849_at		GA binding protein transcription factor, beta subunit 2		TCFL5	transcription factor-like 5 (basic helix-loop-helix)
209849_s_at	1.29625	0.512471	RAD51C	2.52942	NM_002876 /// NM_058216		204873_at		RNA binding motif protein 15		PEX1	peroxisome biogenesis factor 1
208897_s_at	1.39956	0.553391	DDX18	2.52905	NM_006773		204875_s_at		tetratricopeptide repeat domain 3		GMDS	GDP-mannose 4,6-dehydratase
205283_at	1.22726	0.486478	FKTN	2.52275	NM_001079802 /// NM_006731		204883_s_at		wings apart-like homolog (Drosophila)		HUS1	HUS1 checkpoint homolog (S. pombe)
209355_s_at	1.48153	0.5877	PPAP2B	2.5209	NM_003713 /// NM_177414		204887_s_at		ubiquitin associated protein 2-like		PLK4	polo-like kinase 4 (Drosophila)
220079_s_at	1.82895	0.725546	ANTXR1	2.52079	NM_001032730 /// NM_032236		204930_s_at		ectonucleotide pyrophosphatase/phosphodiesterase 1		BNIP1	BCL2/adenovirus E1B 19kDa interacting protein 1
202156_s_at	2.31753	0.919567	CUGBP2	2.52024	NM_001025076 /// NM_001025077 /// NM_001083591 /// NM_006561		204962_s_at		ring finger protein 130		CENPA	centromere protein A
210754_s_at	1.37287	0.544971	LYN	2.51916	NM_001111097 /// NM_002350		204973_at		alpha-methylacyl-CoA racemase /// C1q and tumor necrosis factor related protein 3		GJB1	gap junction protein, beta 1, 32kDa
203968_s_at	1.7812	0.707759	CDC6	2.51668	NM_001254		204980_at		minichromosome maintenance complex component 7		CLOCK	clock homolog (mouse)
204162_at	1.58692	0.631018	NDC80	2.51485	NM_006101		205030_at		inositol polyphosphate-4-phosphatase, type II, 105kDa		FABP7	fatty acid binding protein 7, brain
201756_at	1.51206	0.601278	RPA2	2.51475	NM_002946		205031_at		transmembrane protein 5		EFNB3	ephrin-B3
221804_s_at	1.3461	0.535667	N4BP1	2.51295	NM_018472 /// NM_207009		205034_at		cullin-associated and neddylation-dissociated 1		CCNE2	cyclin E2
201755_at	1.69654	0.675322	MCM5	2.5122	NM_006739		205046_at		palladin, cytoskeletal associated protein		CENPE	centromere protein E, 312kDa
201218_at	1.31634	0.52406	CTBP2	2.51181	NM_001083914 /// NM_001329 /// NM_022802		205047_s_at		RAB2A, member RAS oncogene family		ASNS	asparagine synthetase
201129_at	1.69749	0.675824	SFRS7	2.51174	NM_001031684		205053_at		POZ (BTB) and AT hook containing zinc finger 1		PRIM1	primase, DNA, polypeptide 1 (49kDa)
202850_at	1.18757	0.472861	ABCD3	2.51146	NM_001122674 /// NM_002858		205066_s_at		alcohol dehydrogenase 5 (class III), chi polypeptide		ENPP1	ectonucleotide pyrophosphatase/phosphodiesterase 1
219372_at	1.21335	0.483374	DERL1	2.51018	NM_014055 /// NM_031473		205071_x_at		fibroblast growth factor 13		XRCC4	X-ray repair complementing defective repair in Chinese hamster cells 4
211275_s_at	1.49538	0.596044	GYG1	2.50885	NM_004130		205078_at		chromosome 19 open reading frame 2		PIGF	phosphatidylinositol glycan anchor biosynthesis, class F
218477_at	1.4209	0.5665	SLC35A5	2.50822	NM_014051		205079_s_at		kinesin-associated protein 3		MPDZ	multiple PDZ domain protein
218663_at	1.44781	0.577751	MECR	2.50594	NM_022346		205110_s_at		stonin 1		FGF13	fibroblast growth factor 13
220311_at	1.3791	0.551002	MYLIP	2.5029	NM_013240 /// NM_182749		205133_s_at		replication factor C (activator 1) 1, 145kDa		HSPE1	heat shock 10kDa protein 1 (chaperonin 10)
215517_at	1.30543	0.522093	JMJD2B	2.50038	NM_015617		205168_at		embryonic ectoderm development		DDR2	discoidin domain receptor tyrosine kinase 2
222305_at	1.61165	0.645014	HEY1	2.49863	NM_000189		205174_s_at		GTPase activating protein and VPS9 domains 1		QPCT	glutaminyl-peptide cyclotransferase (glutaminyl cyclase)
213478_at	1.57154	0.629018	NPTX2	2.49841	NM_001017999 /// NM_001018000 /// NM_001018001 /// NM_015209 /// NM_201628		205227_at		acetyl-Coenzyme A acetyltransferase 2		IL1RAP	interleukin 1 receptor accessory protein
202412_s_at	1.32889	0.532568	USP1	2.49525	NM_001017415 /// NM_001017416 /// NM_003368		205240_at		NADH dehydrogenase (ubiquinone) flavoprotein 1, 51kDa		GPSM2	G-protein signaling modulator 2 (AGS3-like, C. elegans)
212138_at	1.20001	0.48146	PDS5A	2.49243	NM_001100399 /// NM_001100400 /// NM_015200		205264_at		chloride channel, nucleotide-sensitive, 1A		CD3EAP	CD3e molecule, epsilon associated protein
211136_s_at	1.51142	0.60655	CLPTM1	2.49183	NM_001294		205273_s_at		peptidylprolyl isomerase E (cyclophilin E)		PITRM1	pitrilysin metallopeptidase 1
200071_at	1.47622	0.592574	SMNDC1	2.4912	NM_005871		205278_at		intraflagellar transport 81 homolog (Chlamydomonas)		GAD1	glutamate decarboxylase 1 (brain, 67kDa)
202944_at	1.64218	0.660333	NAGA	2.48689	NM_000262		205283_at		arrestin, beta 1		FKTN	fukutin
222103_at	1.4347	0.577004	INTS7	2.48647	NM_005171		205329_s_at		chromosome 16 open reading frame 80		SNX4	sorting nexin 4
220494_s_at	1.58586	0.637899	GBL	2.48607	---		205345_at		zinc finger protein 227		BARD1	BRCA1 associated RING domain 1
218676_s_at	1.40262	0.564844	EXOSC4	2.4832	NM_001102402 /// NM_021213		205369_x_at		tankyrase, TRF1-interacting ankyrin-related ADP-ribose polymerase 2		DBT	dihydrolipoamide branched chain transacylase E2
205078_at	1.33419	0.53749	PIGF	2.48226	NM_002643 /// NM_173074		205376_at		aspartylglucosaminidase		INPP4B	inositol polyphosphate-4-phosphatase, type II, 105kDa
212499_s_at	1.62189	0.653444	FCF1 /// MAPK1IP1L	2.48207	NM_015962 /// NM_144578		205393_s_at		butyrylcholinesterase		CHEK1	CHK1 checkpoint homolog (S. pombe)
207891_s_at	1.73848	0.700511	TREX2 /// UCHL5IP	2.48173	NM_017518 /// NM_080701 /// NM_207107		205395_s_at		KRIT1, ankyrin repeat containing		MRE11A	MRE11 meiotic recombination 11 homolog A (S. cerevisiae)
201830_s_at	1.34025	0.540066	NET1	2.48165	NM_001047160 /// NM_005863		205407_at		tripartite motif-containing 14		RECK	reversion-inducing-cysteine-rich protein with kazal motifs
217772_s_at	1.36998	0.552055	PTPLAD1	2.4816	NM_014342		205433_at		mitochondrial GTPase 1 homolog (S. cerevisiae)		BCHE	butyrylcholinesterase
203680_at	1.30546	0.526326	PRKAR2B	2.48032	NM_002736		205436_s_at		cyclin-dependent kinase 5		H2AFX	H2A histone family, member X
219686_at	1.85183	0.746796	MNS1	2.4797	NM_018401		205498_at		acireductone dioxygenase 1		GHR	growth hormone receptor
205524_s_at	1.87243	0.755139	HAPLN1	2.47958	NM_001884		205524_s_at		cell division cycle 6 homolog (S. cerevisiae)		HAPLN1	hyaluronan and proteoglycan link protein 1
211456_x_at	1.38717	0.560217	MT1P2	2.47613	---		205527_s_at		tensin 3		GEMIN4	gem (nuclear organelle) associated protein 4
220994_s_at	1.03398	0.417624	DDEF1	2.47586	NM_014178		205542_at		quaking homolog, KH domain RNA binding (mouse)		STEAP1	six transmembrane epithelial antigen of the prostate 1
205498_at	1.56406	0.632195	GHR	2.47402	NM_000163		205590_at		chromosome 1 open reading frame 112		RASGRP1	RAS guanyl releasing protein 1 (calcium and DAG-regulated)
203764_at	1.36994	0.553828	DLG7	2.47359	NM_014750		205613_at		transcription factor A, mitochondrial		SYT17	synaptotagmin XVII
201801_s_at	2.00002	0.80987	SLC29A1	2.46956	NM_001078174 /// NM_001078175 /// NM_001078176 /// NM_001078177 /// NM_004955		205662_at		protein tyrosine phosphatase, non-receptor type 11 (Noonan syndrome 1)		B9D1	B9 protein domain 1
203069_at	1.38265	0.56079	SV2A	2.46553	NM_014849		205681_at		KH domain containing, RNA binding, signal transduction associated 1		BCL2A1	BCL2-related protein A1
209707_at	1.34502	0.545716	PIGK	2.4647	NM_005482		205763_s_at		UDP-N-acetyl-alpha-D-galactosamine:polypeptide N-acetylgalactosaminyltransferase 7 (GalNAc-T7)		DDX18	DEAD (Asp-Glu-Ala-Asp) box polypeptide 18
219539_at	1.51027	0.612811	NME7	2.4645	NM_024775		205771_s_at		5-methyltetrahydrofolate-homocysteine methyltransferase reductase		AKAP7	A kinase (PRKA) anchor protein 7
204825_at	1.57905	0.641782	MELK	2.46042	NM_014791		205808_at		RAD17 homolog (S. pombe)		ASPH	aspartate beta-hydroxylase
200790_at	1.51326	0.615091	ODC1	2.46021	NM_002539		205860_x_at		zinc finger CCCH-type containing 14		FOLH1	folate hydrolase (prostate-specific membrane antigen) 1
214047_s_at	1.24715	0.50736	WDR67	2.45811	NM_003925		205882_x_at		proteasome (prosome, macropain) 26S subunit, non-ATPase, 10		ADD3	adducin 3 (gamma)
212221_x_at	1.49702	0.60908	IDS	2.45784	NM_000202 /// NM_006123		205909_at		ribosomal RNA processing 15 homolog (S. cerevisiae)		POLE2	polymerase (DNA directed), epsilon 2 (p59 subunit)
209307_at	1.3949	0.568061	SWAP70	2.45555	NM_015055		205928_at		septin 6 /// cytokine-like nuclear factor n-pac		ZNF443	zinc finger protein 443
215735_s_at	1.45623	0.593218	CYFIP2	2.4548	NM_000548 /// NM_001077183 /// NM_001114382		205961_s_at		thioredoxin domain containing 14		PSIP1	PC4 and SFRS1 interacting protein 1
214334_x_at	1.2877	0.524597	COPA	2.45464	NM_014764		206015_s_at		replication factor C (activator 1) 4, 37kDa		FOXJ3	forkhead box J3
212037_at	1.32524	0.540365	PNN	2.4525	NM_002687		206081_at		desmuslin		SLC24A1	solute carrier family 24 (sodium/potassium/calcium exchanger), member 1
222077_s_at	1.38629	0.56561	NT5C1B /// RDH14	2.45097	NM_001126103 /// NM_001126104 /// NM_013277		206102_at		kinesin family member 15		GINS1	GINS complex subunit 1 (Psf1 homolog)
217725_x_at	1.61168	0.658558	ITM2B	2.44728	NM_001018067 /// NM_001018068 /// NM_001018069 /// NM_015640		206117_at		translin		TPM1	tropomyosin 1 (alpha)
200943_at	1.20996	0.49517	HMGN1	2.44352	NM_004965		206167_s_at		transmembrane protein 97		ARHGAP6	Rho GTPase activating protein 6
209131_s_at	1.3217	0.541184	SNAP23	2.44224	NM_003825 /// NM_130798		206173_x_at		transmembrane and coiled-coil domains 1		GABPB2	GA binding protein transcription factor, beta subunit 2
202846_s_at	1.41862	0.581045	PIGC	2.4415	NM_002642 /// NM_153747		206224_at		proteasome (prosome, macropain) 26S subunit, non-ATPase, 4		CST1	cystatin SN
202633_at	1.34643	0.551738	TOPBP1	2.44034	NM_007027		206364_at		quaking homolog, KH domain RNA binding (mouse)		KIF14	kinesin family member 14
214173_x_at	1.43194	0.587263	PIN4	2.43833	NM_003796 /// NM_134447		206373_at		Desmoglein 2		ZIC1	Zic family member 1 (odd-paired homolog, Drosophila)
204630_s_at	1.34955	0.553688	GOSR1	2.43738	NM_001007024 /// NM_001007025 /// NM_004871		206414_s_at		proteasome (prosome, macropain) subunit, alpha type, 2		DDEF2	development and differentiation enhancing factor 2
212405_s_at	1.53592	0.630179	KIAA0859	2.43727	NM_001007239 /// NM_014955 /// NM_015935		206441_s_at		mutS homolog 6 (E. coli)		COMMD4	COMM domain containing 4
212131_at	1.54694	0.634825	LSM14A	2.4368	NM_001114093 /// NM_015578		206544_x_at		phosphoinositide-3-kinase, regulatory subunit 3 (gamma)		SMARCA2	SWI/SNF related, matrix associated, actin dependent regulator of chromatin, subfamily a, member 2
208745_at	1.38693	0.569516	ATP5L	2.43528	NM_006476		206550_s_at		BCL2/adenovirus E1B 19kDa interacting protein 1		NUP155	nucleoporin 155kDa
204332_s_at	1.44351	0.592847	AGA	2.43489	NM_000027		206632_s_at		ring finger protein 167		APOBEC3B	apolipoprotein B mRNA editing enzyme, catalytic polypeptide-like 3B
213474_at	1.38971	0.570953	RP1-21O18.1	2.43402	---		206685_at		bromodomain and WD repeat domain containing 1		HCG4	HLA complex group 4
201267_s_at	1.44317	0.592974	PSMC3	2.43378	NM_002804		206746_at		activating transcription factor 1		BFSP1	beaded filament structural protein 1, filensin
202446_s_at	1.26606	0.520209	PLSCR1	2.43376	NM_021105		206770_s_at		dihydrofolate reductase		SLC35A3	solute carrier family 35 (UDP-N-acetylglucosamine (UDP-GlcNAc) transporter), member A3
214953_s_at	1.51866	0.624405	FEZ2	2.43217	NM_000484 /// NM_201413 /// NM_201414		206999_at		heterogeneous nuclear ribonucleoprotein A/B		IL12RB2	interleukin 12 receptor, beta 2
203832_at	1.47867	0.607986	SNRPF	2.43207	NM_003095		207121_s_at		forkhead box J3		MAPK6	mitogen-activated protein kinase 6
218519_at	1.34669	0.553787	CEP55	2.43178	NM_017945		207124_s_at		Rap guanine nucleotide exchange factor (GEF) 2		GNB5	guanine nucleotide binding protein (G protein), beta 5
202737_s_at	1.584	0.651614	LSM4	2.43088	NM_012321		207165_at		structural maintenance of chromosomes 4		HMMR	hyaluronan-mediated motility receptor (RHAMM)
221998_s_at	1.49032	0.613164	RACGAP1	2.43054	NM_001025778 /// NM_016440		207199_at		TAF9B RNA polymerase II, TATA box binding protein (TBP)-associated factor, 31kDa /// similar to transcription associated factor TAFII31L		TERT	telomerase reverse transcriptase
218055_s_at	1.31621	0.541532	BFAR	2.43052	NM_018268		207232_s_at		RAB3 GTPase activating protein subunit 2 (non-catalytic)		DZIP3	DAZ interacting protein 3, zinc finger
201296_s_at	1.17373	0.483151	WSB1	2.42932	NM_015626 /// NM_134265		207233_s_at		SAM and SH3 domain containing 1		MITF	microphthalmia-associated transcription factor
210093_s_at	1.54208	0.634917	MAGOH	2.42879	NM_002370		207332_s_at		ATPase family, AAA domain containing 2		TFRC	transferrin receptor (p90, CD71)
219485_s_at	1.26683	0.521614	NXN	2.42868	NM_002814 /// NM_170750		207405_s_at		mitogen-activated protein kinase kinase 5		RAD17	RAD17 homolog (S. pombe)
218858_at	2.00796	0.827062	FBXO5	2.42782	NM_022783		207722_s_at		DSN1, MIND kinetochore complex component, homolog (S. cerevisiae)		BTBD2	BTB (POZ) domain containing 2
211713_x_at	1.67625	0.690755	KIAA0101	2.42669	NM_001029989 /// NM_014736		207830_s_at		lactamase, beta 2		PPP1R8	protein phosphatase 1, regulatory (inhibitor) subunit 8
203079_s_at	1.3886	0.572334	CUL2	2.42621	NM_003591		207831_x_at		retinoblastoma binding protein 8		DHPS	deoxyhypusine synthase
211933_s_at	1.28381	0.529392	HNRNPA3 /// HNRNPA3P1	2.42506	NM_194247 /// NR_002726		207871_s_at		guanine monphosphate synthetase		ST7	suppression of tumorigenicity 7
220992_s_at	1.30874	0.53995	STXBP6	2.42383	NM_030934		207891_s_at		selenoprotein X, 1		TREX2 /// UCHL5IP	three prime repair exonuclease 2 /// UCHL5 interacting protein
203625_x_at	1.51352	0.624569	SKP2	2.42331	NM_005983 /// NM_032637		208024_s_at		peptidylprolyl isomerase H (cyclophilin H)		DGCR6 /// DGCR6L	DiGeorge syndrome critical region gene 6 /// DiGeorge syndrome critical region gene 6-like
212033_at	1.63875	0.676783	RBM25	2.42138	NM_021239		208051_s_at		myotubularin related protein 2		PAIP1	poly(A) binding protein interacting protein 1
212009_s_at	1.48017	0.611314	STIP1	2.42129	NM_006819		208070_s_at		Sp3 transcription factor		REV3L	REV3-like, catalytic subunit of DNA polymerase zeta (yeast)
210114_at	1.29946	0.536707	INVS	2.42118	NM_014425 /// NM_183245		208079_s_at		golgi membrane protein 1		AURKA	aurora kinase A
204281_at	1.53181	0.633127	TEAD4	2.41943	NM_003213 /// NM_201441 /// NM_201443		208114_s_at		split hand/foot malformation (ectrodactyly) type 1		ISG20L2	interferon stimulated exonuclease gene 20kDa-like 2
201014_s_at	1.38862	0.574127	PAICS	2.41867	NM_001079524 /// NM_001079525 /// NM_006452		208119_s_at		MyoD family inhibitor domain containing		ZNF93	zinc finger protein 93
221589_s_at	1.30869	0.541691	ACOT9	2.41594	NM_005589		208358_s_at		lymphoid enhancer-binding factor 1		UGT8	UDP glycosyltransferase 8 (UDP-galactose ceramide galactosyltransferase)
200810_s_at	1.53703	0.636352	CIRBP	2.41538	NM_001280 /// NR_023312 /// NR_023313		208368_s_at		gametogenetin binding protein 2		BRCA2	breast cancer 2, early onset
218149_s_at	1.57413	0.652142	MCTS1	2.41378	NM_018660		208643_s_at		MRE11 meiotic recombination 11 homolog A (S. cerevisiae)		XRCC5	X-ray repair complementing defective repair in Chinese hamster cells 5 (double-strand-break rejoining; Ku autoantigen, 80kDa)
217786_at	1.5358	0.636294	WBP11	2.41366	NM_001039619 /// NM_006109		208661_s_at		translocase of outer mitochondrial membrane 70 homolog A (S. cerevisiae)		TTC3	tetratricopeptide repeat domain 3
213483_at	1.34616	0.557912	HLA-DPA1	2.41285	NM_015342		208678_at		nucleoporin 93kDa		ATP6V1E1	ATPase, H+ transporting, lysosomal 31kDa, V1 subunit E1
212905_at	1.59017	0.659098	CSTF2T	2.41264	NM_015235		208714_at		lysine-rich coiled-coil 1		NDUFV1	NADH dehydrogenase (ubiquinone) flavoprotein 1, 51kDa
209507_at	1.47738	0.612447	RPA3	2.41226	NM_002947		208715_at		SRY (sex determining region Y)-box 4		TMCO1	transmembrane and coiled-coil domains 1
220631_at	1.36424	0.565861	HP1BP3	2.41091	NM_022353		208716_s_at		coiled-coil domain containing 99		TMCO1	transmembrane and coiled-coil domains 1
202730_s_at	1.30287	0.541029	PDCD4	2.40813	NM_014456 /// NM_145341		208731_at		CHK1 checkpoint homolog (S. pombe)		RAB2A	RAB2A, member RAS oncogene family
201528_at	1.37634	0.572847	RPA1	2.40263	NM_002945		208745_at		peroxisomal trans-2-enoyl-CoA reductase		ATP5L	ATP synthase, H+ transporting, mitochondrial F0 complex, subunit G
211759_x_at	1.36259	0.567271	TBCB	2.40202	NM_001281		208748_s_at		amyloid beta precursor protein (cytoplasmic tail) binding protein 2		FLOT1	flotillin 1
201857_at	1.37631	0.573501	ZFR	2.39985	NM_016107		208753_s_at		amyloid beta (A4) precursor protein (peptidase nexin-II, Alzheimer disease)		NAP1L1	nucleosome assembly protein 1-like 1
221685_s_at	1.40968	0.587644	DDX50	2.39887	NM_017785		208775_at		cytochrome b reductase 1		XPO1	exportin 1 (CRM1 homolog, yeast)
219918_s_at	1.38362	0.577345	UCHL5	2.39652	NM_018136		208784_s_at		retinoic acid induced 14		KLHDC3	kelch domain containing 3
203856_at	1.75252	0.731383	VRK1	2.39617	NM_003384		208795_s_at		kinesin family member 2C		MCM7	minichromosome maintenance complex component 7
209967_s_at	1.55526	0.649173	CREM	2.39576	NM_001881 /// NM_181571 /// NM_182717 /// NM_182718 /// NM_182719 /// NM_182720 /// NM_182721 /// NM_182722 /// NM_182723 /// NM_182724 /// NM_182725 /// NM_182769 /// NM_182770 /// NM_182771 /// NM_182772 /// NM_182850 /// NM_182853 /// NM_183011 /// NM_183012 /// NM_183013 /// NM_183060		208808_s_at		interferon stimulated exonuclease gene 20kDa-like 2		HMGB2	high-mobility group box 2
217829_s_at	1.46086	0.609981	SYNCRIP	2.39492	NM_006590		208838_at		origin recognition complex, subunit 4-like (yeast)		CAND1	cullin-associated and neddylation-dissociated 1
213226_at	1.4632	0.611044	CCNA2	2.39459	NM_001237		208839_s_at		membrane-associated ring finger (C3HC4) 6		CAND1	cullin-associated and neddylation-dissociated 1
217822_at	1.40611	0.587848	USP39	2.39196	NM_016312		208847_s_at		centromere protein A		ADH5	alcohol dehydrogenase 5 (class III), chi polypeptide
217901_at	1.28754	0.538465	FAM49B	2.39114	NM_001943		208848_at		golgi phosphoprotein 3-like		ADH5	alcohol dehydrogenase 5 (class III), chi polypeptide
219209_at	1.75539	0.734879	USP18	2.38868	NM_022168		208879_x_at		methyl-CpG binding domain protein 4		PRPF6	PRP6 pre-mRNA processing factor 6 homolog (S. cerevisiae)
218949_s_at	1.41134	0.59089	PAAF1	2.3885	NM_018292		208886_at		denticleless homolog (Drosophila)		H1F0	H1 histone family, member 0
200993_at	1.23519	0.517141	IPO7	2.38849	NM_006391		208897_s_at		vitamin D (1,25- dihydroxyvitamin D3) receptor		DDX18	DEAD (Asp-Glu-Ala-Asp) box polypeptide 18
209980_s_at	1.88382	0.789516	SHMT1	2.38605	NM_004169 /// NM_148918		208906_at		adducin 3 (gamma)		BSCL2 /// HNRNPUL2	Bernardinelli-Seip congenital lipodystrophy 2 (seipin) /// heterogeneous nuclear ribonucleoprotein U-like 2
208932_at	1.32162	0.553971	PPP4C	2.38573	NM_002720		208932_at		voltage-dependent anion channel 1 /// similar to Voltage-dependent anion-selective channel protein 1 (VDAC-1) (hVDAC1) (Outer mitochondrial membrane protein porin 1) (Plasmalemmal porin) (Porin 31HL) (Porin 31HM)		PPP4C	protein phosphatase 4 (formerly X), catalytic subunit
217923_at	1.42008	0.595326	BTBD1	2.38538	NM_012392		208951_at		mitochondrial ribosomal protein S33		ALDH7A1	aldehyde dehydrogenase 7 family, member A1
204256_at	1.82538	0.765439	ELOVL6	2.38475	NM_024090		208955_at		heat shock 10kDa protein 1 (chaperonin 10)		DUT	deoxyuridine triphosphatase
219402_s_at	1.36957	0.574412	RAB38	2.38429	NM_024295		208956_x_at		solute carrier family 35, member E3		DUT	deoxyuridine triphosphatase
213313_at	1.27695	0.535574	RABGAP1	2.38427	NM_012197		208984_x_at		zinc finger protein 395		RBM10	RNA binding motif protein 10
218321_x_at	1.27041	0.532857	PPCS	2.38414	NM_016086		208990_s_at		apolipoprotein B mRNA editing enzyme, catalytic polypeptide-like 3B		HNRNPH3	heterogeneous nuclear ribonucleoprotein H3 (2H9)
219565_at	1.6275	0.683509	NCAPG2	2.3811	NM_177538		208993_s_at		chromatin assembly factor 1, subunit A (p150)		PPIG	peptidylprolyl isomerase G (cyclophilin G)
219960_s_at	1.42786	0.600063	C20orf19	2.37951	NM_015984		209025_s_at		sphingomyelin phosphodiesterase, acid-like 3A		SYNCRIP	synaptotagmin binding, cytoplasmic RNA interacting protein
218079_s_at	1.43915	0.604879	UBP1	2.37924	NM_024835		209031_at		primase, DNA, polypeptide 1 (49kDa)		CADM1	cell adhesion molecule 1
201456_s_at	1.56592	0.658452	BUB3	2.37818	NM_001007793 /// NM_004725		209033_s_at		sterile alpha motif domain containing 4A		DYRK1A	dual-specificity tyrosine-(Y)-phosphorylation regulated kinase 1A
214764_at	1.20593	0.507086	TIPRL	2.37815	NM_016052		209040_s_at		glutamate decarboxylase 1 (brain, 67kDa)		PSMB8	proteasome (prosome, macropain) subunit, beta type, 8 (large multifunctional peptidase 7)
203195_s_at	1.36802	0.57547	NUP98	2.37723	NM_005387 /// NM_016320 /// NM_139131 /// NM_139132		209052_s_at		pantothenate kinase 2 (Hallervorden-Spatz syndrome)		WHSC1	Wolf-Hirschhorn syndrome candidate 1
200927_s_at	1.42642	0.600128	RAB14	2.37687	NM_016322		209053_s_at		LIM and calponin homology domains 1		WHSC1	Wolf-Hirschhorn syndrome candidate 1
221516_s_at	1.41104	0.59401	GINS2	2.37545	NM_019008		209055_s_at		prenylcysteine oxidase 1		CDC5L	CDC5 cell division cycle 5-like (S. pombe)
221583_s_at	1.82776	0.770614	KCNMA1	2.37183	NM_001014797 /// NM_002247		209056_s_at		TTK protein kinase		CDC5L	CDC5 cell division cycle 5-like (S. pombe)
212801_at	1.46295	0.61681	CIT	2.3718	NM_007174		209065_at		---		UQCRB	ubiquinol-cytochrome c reductase binding protein
212228_s_at	1.39881	0.589813	COQ9	2.37162	NM_020312		209085_x_at		tubulin, delta 1		RFC1	replication factor C (activator 1) 1, 145kDa
202088_at	1.39307	0.587453	SLC39A6	2.37138	NM_001099406 /// NM_012319		209131_s_at		nephroblastoma overexpressed gene		SNAP23	synaptosomal-associated protein, 23kDa
210990_s_at	1.37325	0.579315	LAMA4	2.37048	NM_001105206 /// NM_001105207 /// NM_001105208 /// NM_001105209 /// NM_002290		209143_s_at		WD repeat domain 59		CLNS1A	chloride channel, nucleotide-sensitive, 1A
213064_at	1.4397	0.607808	ZC3H14	2.36868	NM_024824 /// NM_207660 /// NM_207661 /// NM_207662		209162_s_at		YY1 transcription factor		PRPF4	PRP4 pre-mRNA processing factor 4 homolog (yeast)
211814_s_at	1.39092	0.587278	CCNE2	2.36842	NM_057749		209167_at		isoleucyl-tRNA synthetase		GPM6B	glycoprotein M6B
202580_x_at	1.53127	0.646568	FOXM1	2.3683	NM_021953 /// NM_202002 /// NM_202003		209170_s_at		flap structure-specific endonuclease 1		GPM6B	glycoprotein M6B
212279_at	1.49332	0.630693	TMEM97	2.36775	NM_014573		209180_at		RAD1 homolog (S. pombe)		RABGGTB	Rab geranylgeranyltransferase, beta subunit
209250_at	1.34018	0.566747	DEGS1	2.3647	NM_003676 /// NM_144780		209219_at		fatty acid binding protein 7, brain		RDBP	RD RNA binding protein
209052_s_at	1.34591	0.569199	WHSC1	2.36456	NM_001042424 /// NM_007331 /// NM_133330 /// NM_133331 /// NM_133334 /// NM_133335		209228_x_at		deoxyguanosine kinase		TUSC3	tumor suppressor candidate 3
201240_s_at	1.26706	0.535862	SPCS2	2.36452	NM_014752		209234_at		polymerase (DNA directed), epsilon 2 (p59 subunit)		KIF1B	kinesin family member 1B
219104_at	1.27909	0.541384	RBM35A	2.36262	NM_016422		209250_at		UTP14, U3 small nucleolar ribonucleoprotein, homolog A (yeast)		DEGS1	degenerative spermatocyte homolog 1, lipid desaturase (Drosophila)
204835_at	1.60572	0.679776	POLA1	2.36214	NM_016937		209272_at		zinc finger protein 292		NAB1	NGFI-A binding protein 1 (EGR1 binding protein 1)
202651_at	1.33499	0.565282	LPGAT1	2.36164	NM_014873		209288_s_at		replication factor C (activator 1) 5, 36.5kDa		CDC42EP3	CDC42 effector protein (Rho GTPase binding) 3
208079_s_at	1.60387	0.679244	AURKA	2.36126	NM_003600 /// NM_198433 /// NM_198434 /// NM_198435 /// NM_198436 /// NM_198437		209296_at		phospholipase C, beta 4		PPM1B	protein phosphatase 1B (formerly 2C), magnesium-dependent, beta isoform
203538_at	1.30557	0.552962	CAMLG	2.36106	NM_001745		209306_s_at		heme binding protein 1		SWAP70	SWAP-70 protein
212244_at	1.25264	0.530607	Gcom1 /// GRINL1A	2.36076	NM_001018090 /// NM_001018091 /// NM_001018100 /// NM_001018102 /// NM_001018103 /// NM_015532 /// NM_152451		209307_at		minichromosome maintenance complex component 4		SWAP70	SWAP-70 protein
208955_at	1.57946	0.669438	DUT	2.35938	NM_001025248 /// NM_001025249 /// NM_001948		209337_at		chromosome 1 open reading frame 25		PSIP1	PC4 and SFRS1 interacting protein 1
201120_s_at	1.4329	0.607521	PGRMC1	2.3586	NM_006667		209355_s_at		asp (abnormal spindle) homolog, microcephaly associated (Drosophila)		PPAP2B	phosphatidic acid phosphatase type 2B
202240_at	1.54796	0.656315	PLK1	2.35856	NM_005030		209377_s_at		syntaxin 7		HMGN3	high mobility group nucleosomal binding domain 3
201111_at	1.4708	0.623784	CSE1L	2.35787	NM_001316		209425_at		Rho GDP dissociation inhibitor (GDI) alpha		AMACR /// C1QTNF3	alpha-methylacyl-CoA racemase /// C1q and tumor necrosis factor related protein 3
204619_s_at	1.49542	0.634692	VCAN	2.35613	NM_001126336 /// NM_004385		209426_s_at		phosphoribosyl pyrophosphate amidotransferase		AMACR /// C1QTNF3	alpha-methylacyl-CoA racemase /// C1q and tumor necrosis factor related protein 3
204798_at	1.34921	0.573188	MYB	2.35387	NM_005375		209431_s_at		Transcribed locus		PATZ1	POZ (BTB) and AT hook containing zinc finger 1
210835_s_at	1.39736	0.593884	CTBP2	2.35291	NM_001083914 /// NM_001329 /// NM_022802		209432_s_at		homeobox B7		CREB3	cAMP responsive element binding protein 3
217526_at	1.51479	0.643794	C18orf24	2.35291	NM_032815		209433_s_at		minichromosome maintenance complex component 7		PPAT	phosphoribosyl pyrophosphate amidotransferase
218883_s_at	1.34367	0.571249	GALNT12	2.35216	NM_024629		209434_s_at		baculoviral IAP repeat-containing 5 (survivin)		PPAT	phosphoribosyl pyrophosphate amidotransferase
202020_s_at	1.47886	0.628754	LANCL1	2.35205	NM_006055		209444_at		G-2 and S-phase expressed 1		RAP1GDS1	RAP1, GTP-GDP dissociation stimulator 1
215089_s_at	1.40455	0.597173	GOLGA4	2.35199	NM_005676 /// NM_152856		209459_s_at		PRP40 pre-mRNA processing factor 40 homolog A (S. cerevisiae)		ABAT	4-aminobutyrate aminotransferase
209586_s_at	1.43016	0.608233	PRUNE	2.35133	NM_021222		209463_s_at		calcyclin binding protein		TAF12	TAF12 RNA polymerase II, TATA box binding protein (TBP)-associated factor, 20kDa
212764_at	1.25953	0.535803	ZEB1	2.35074	NM_030751		209478_at		cystatin SN		STRA13	stimulated by retinoic acid 13 homolog (mouse)
213355_at	1.48653	0.632736	ST3GAL6	2.34937	NM_006100		209503_s_at		Clone 23548 mRNA sequence		PSMC5	proteasome (prosome, macropain) 26S subunit, ATPase, 5
222288_at	1.9644	0.83621	AGPAT7	2.34917	---		209507_at		MRNA; cDNA DKFZp686K0394 (from clone DKFZp686K0394)		RPA3	replication protein A3, 14kDa
221193_s_at	1.50009	0.639088	RIPK4	2.34724	NM_017665		209515_s_at		cytosolic iron-sulfur protein assembly 1 homolog (S. cerevisiae)		RAB27A	RAB27A, member RAS oncogene family
201391_at	1.39142	0.592792	TRAP1	2.34724	NM_016292		209520_s_at		SERPINE1 mRNA binding protein 1		NCBP1	nuclear cap binding protein subunit 1, 80kDa
221487_s_at	1.19923	0.51101	KPNA3	2.34679	NM_004436 /// NM_207042 /// NM_207043 /// NM_207044 /// NM_207045 /// NM_207046 /// NM_207047 /// NM_207168		209527_at		ubiquitin specific peptidase 1		EXOSC2	exosome component 2
219121_s_at	1.12754	0.480616	PELI2	2.34602	NM_001034915 /// NM_001122825 /// NM_001122826 /// NM_001122827 /// NM_017697		209549_s_at		deleted in lymphocytic leukemia, 2		DGUOK	deoxyguanosine kinase
222266_at	1.41275	0.602452	ASMTL	2.34499	NM_003796 /// NM_134447		209565_at		damage-specific DNA binding protein 2, 48kDa		RNF113A	ring finger protein 113A
213701_at	1.47317	0.628247	SMARCA4	2.3449	NM_001009894		209566_at		proteasome (prosome, macropain) subunit, alpha type, 7		INSIG2	insulin induced gene 2
204386_s_at	1.3695	0.584446	MRP63	2.34325	NM_024026		209572_s_at		transmembrane protein 106C		EED	embryonic ectoderm development
218039_at	1.31537	0.561542	MRPS16	2.34242	NM_016359 /// NM_018454		209586_s_at		MYC binding protein 2		PRUNE	prune homolog (Drosophila)
212008_at	1.32654	0.566521	UBXD2	2.34155	NM_014607		209608_s_at		GTP cyclohydrolase 1 (dopa-responsive dystonia)		ACAT2	acetyl-Coenzyme A acetyltransferase 2
209228_x_at	1.38216	0.590461	TUSC3	2.34082	NM_006765 /// NM_178234		209620_s_at		peptidylglycine alpha-amidating monooxygenase		ABCB7	ATP-binding cassette, sub-family B (MDR/TAP), member 7
204833_at	1.40848	0.601828	ATG12	2.34034	NM_004707		209621_s_at		H2A histone family, member X		PDLIM3	PDZ and LIM domain 3
212774_at	1.23074	0.525922	ZNF238	2.34015	NM_006352 /// NM_205768		209630_s_at		ribosomal protein L22		FBXW2	F-box and WD repeat domain containing 2
204369_at	1.35894	0.580721	PIK3CA	2.34009	NM_006218		209631_s_at		tubulin, gamma 1		GPR37	G protein-coupled receptor 37 (endothelin receptor type B-like)
201593_s_at	1.45233	0.620658	ZC3H15	2.33998	NM_018471		209662_at		StAR-related lipid transfer (START) domain containing 7		CETN3	centrin, EF-hand protein, 3 (CDC31 homolog, yeast)
201472_at	1.32976	0.568998	VBP1	2.33702	NM_003372		209707_at		torsin A interacting protein 1		PIGK	phosphatidylinositol glycan anchor biosynthesis, class K
208984_x_at	1.38831	0.594112	RBM10	2.33678	NM_005676 /// NM_152856		209709_s_at		alcohol dehydrogenase 5 (class III), chi polypeptide		HMMR	hyaluronan-mediated motility receptor (RHAMM)
218628_at	1.43585	0.614504	CRIPT	2.3366	NM_016053		209715_at		BCL2-like 1		CBX5	chromobox homolog 5 (HP1 alpha homolog, Drosophila)
202107_s_at	1.62502	0.69549	MCM2	2.33651	NM_004526		209759_s_at		stress 70 protein chaperone, microsome-associated, 60kDa		DCI	dodecenoyl-Coenzyme A delta isomerase (3,2 trans-enoyl-Coenzyme A isomerase)
212855_at	1.27186	0.544487	DCUN1D4	2.33589	NM_001040402 /// NM_015115		209773_s_at		calmodulin 1 (phosphorylase kinase, delta) /// calmodulin 2 (phosphorylase kinase, delta) /// calmodulin 3 (phosphorylase kinase, delta)		RRM2	ribonucleotide reductase M2 polypeptide
202967_at	1.39066	0.595713	GSTA4	2.33445	NM_001512		209780_at		small nuclear ribonucleoprotein D3 polypeptide 18kDa		PHTF2	putative homeodomain transcription factor 2
205079_s_at	1.39396	0.597286	MPDZ	2.33383	NM_003829		209790_s_at		DEAD (Asp-Glu-Ala-Asp) box polypeptide 18		CASP6	caspase 6, apoptosis-related cysteine peptidase
205763_s_at	1.38406	0.593116	DDX18	2.33354	NM_006773		209798_at		multiple PDZ domain protein		NPAT	nuclear protein, ataxia-telangiectasia locus
202567_at	1.66946	0.715512	SNRPD3	2.33324	NM_004175		209846_s_at		glutathione S-transferase A4		BTN3A2	butyrophilin, subfamily 3, member A2
200653_s_at	1.607	0.68896	CALM1 /// CALM2 /// CALM3	2.3325	NM_001743 /// NM_005184 /// NM_006888		209849_s_at		DCN1, defective in cullin neddylation 1, domain containing 4 (S. cerevisiae)		RAD51C	RAD51 homolog C (S. cerevisiae)
202557_at	1.17009	0.50181	STCH	2.33173	NM_006948		209862_s_at		minichromosome maintenance complex component 2		CEP57	centrosomal protein 57kDa
212312_at	1.68031	0.721091	BCL2L1	2.33023	NM_001191 /// NM_138578		209896_s_at		cysteine-rich PDZ-binding protein		PTPN11	protein tyrosine phosphatase, non-receptor type 11 (Noonan syndrome 1)
208848_at	1.33679	0.574128	ADH5	2.32839	NM_000671		209902_at		RNA binding motif protein 10		ATR	ataxia telangiectasia and Rad3 related
216064_s_at	1.36417	0.585915	TOR1AIP1	2.32828	NM_000027		209917_s_at		von Hippel-Lindau binding protein 1		TP53AP1	TP53 activated protein 1
200028_s_at	1.4384	0.617823	STARD7	2.32818	NM_020151		209932_s_at		zinc finger CCCH-type containing 15		DUT	deoxyuridine triphosphatase
201714_at	1.37208	0.589465	TUBG1	2.32767	NM_001070		209953_s_at		phosphoinositide-3-kinase, catalytic, alpha polypeptide		CDC37	cell division cycle 37 homolog (S. cerevisiae)
221699_s_at	1.51065	0.649185	RPL22	2.327	NM_024045		209967_s_at		zinc finger protein 238		CREM	cAMP responsive element modulator
205436_s_at	1.62621	0.699183	H2AFX	2.32587	NM_002105		209980_s_at		ATG12 autophagy related 12 homolog (S. cerevisiae)		SHMT1	serine hydroxymethyltransferase 1 (soluble)
202336_s_at	1.36444	0.586666	PAM	2.32576	NM_000919 /// NM_138766 /// NM_138821 /// NM_138822		210053_at		tumor suppressor candidate 3		TAF5	TAF5 RNA polymerase II, TATA box binding protein (TBP)-associated factor, 100kDa
204224_s_at	1.2842	0.552419	GCH1	2.32469	NM_000161 /// NM_001024024 /// NM_001024070 /// NM_001024071		210073_at		UBX domain containing 2		ST8SIA1	ST8 alpha-N-acetyl-neuraminide alpha-2,8-sialyltransferase 1
201959_s_at	1.18548	0.509993	MYCBP2	2.32451	NM_015057		210093_s_at		mitochondrial ribosomal protein S16		MAGOH	mago-nashi homolog, proliferation-associated (Drosophila)
201764_at	1.44031	0.619809	TMEM106C	2.3238	NM_024056		210110_x_at		mitochondrial ribosomal protein 63		HNRNPH3	heterogeneous nuclear ribonucleoprotein H3 (2H9)
201114_x_at	1.5473	0.665951	PSMA7	2.32345	NM_002792		210114_at		SWI/SNF related, matrix associated, actin dependent regulator of chromatin, subfamily a, member 4		INVS	inversin
203409_at	1.60242	0.689676	DDB2	2.32344	NM_000107		210131_x_at		acetylserotonin O-methyltransferase-like		SDHC	succinate dehydrogenase complex, subunit C, integral membrane protein, 15kDa
216602_s_at	1.50163	0.64653	DLEU2	2.3226	NM_004461		210147_at		pellino homolog 2 (Drosophila)		ART3	ADP-ribosyltransferase 3
202413_s_at	1.34413	0.578845	USP1	2.32208	NM_001017415 /// NM_001017416 /// NM_003368		210212_x_at		karyopherin alpha 3 (importin alpha 4)		LOC100133946 /// MTCP1	mature T-cell proliferation 1 /// similar to mature T-cell proliferations 1
210466_s_at	1.1213	0.482977	SERBP1	2.32164	NM_001018067 /// NM_001018068 /// NM_001018069 /// NM_015640		210233_at		TNF receptor-associated protein 1		IL1RAP	interleukin 1 receptor accessory protein
203536_s_at	1.47722	0.636289	CIAO1	2.32163	NM_004804		210239_at		receptor-interacting serine-threonine kinase 4		IRX5	iroquois homeobox 5
44783_s_at	1.32445	0.570595	---	2.32118	NM_001040708 /// NM_012258		210250_x_at		1-acylglycerol-3-phosphate O-acyltransferase 7 (lysophosphatidic acid acyltransferase, eta)		ADSL	adenylosuccinate lyase
214820_at	1.08485	0.467502	---	2.32052	NM_001007246 /// NM_018963 /// NM_033656		210296_s_at		ST3 beta-galactoside alpha-2,3-sialyltransferase 6		PXMP3	peroxisomal membrane protein 3, 35kDa (Zellweger syndrome)
206224_at	0.971837	0.418804	CST1	2.32051	NM_001898		210389_x_at		zinc finger E-box binding homeobox 1		TUBD1	tubulin, delta 1
211761_s_at	1.3504	0.582126	CACYBP	2.31977	NM_001007214 /// NM_014412		210410_s_at		prune homolog (Drosophila)		C6orf26 /// MSH5	mutS homolog 5 (E. coli) /// chromosome 6 open reading frame 26
214848_at	1.27687	0.550521	PRPF40A	2.31938	---		210434_x_at		golgi autoantigen, golgin subfamily a, 4		JTB	jumping translocation breakpoint
204318_s_at	1.54576	0.666588	GTSE1	2.31892	NM_016426		210438_x_at		LanC lantibiotic synthetase component C-like 1 (bacterial)		TROVE2	TROVE domain family, member 2
202095_s_at	1.52549	0.658024	BIRC5	2.31829	NM_001012270 /// NM_001012271 /// NM_001168		210460_s_at		UDP-N-acetyl-alpha-D-galactosamine:polypeptide N-acetylgalactosaminyltransferase 12 (GalNAc-T12)		PSMD4	proteasome (prosome, macropain) 26S subunit, non-ATPase, 4
210983_s_at	1.86607	0.805654	MCM7	2.31622	NM_005916 /// NM_182776		210466_s_at		chromosome 18 open reading frame 24		SERBP1	SERPINE1 mRNA binding protein 1
216883_x_at	1.41761	0.612327	HOXB7	2.31512	NM_002601		210480_s_at		C-terminal binding protein 2		MYO6	myosin VI
36554_at	1.49425	0.645762	---	2.31394	NM_004192 /// XM_001713702		210502_s_at		v-myb myeloblastosis viral oncogene homolog (avian)		PPIE	peptidylprolyl isomerase E (cyclophilin E)
209433_s_at	1.50702	0.65147	PPAT	2.31326	NM_002703		210534_s_at		versican		B9D1	B9 protein domain 1
213591_at	1.63388	0.706339	ARHGDIA	2.31316	NM_001182		210589_s_at		CSE1 chromosome segregation 1-like (yeast)		GBA /// GBAP	glucosidase, beta; acid (includes glucosylceramidase) /// glucosidase, beta; acid, pseudogene
212631_at	1.32208	0.571927	STX7	2.31163	NM_003569		210655_s_at		polo-like kinase 1 (Drosophila)		FOXO3	forkhead box O3
219911_s_at	1.85722	0.803645	ASPM	2.31099	NM_016354 /// XM_001720240		210754_s_at		progesterone receptor membrane component 1		LYN	v-yes-1 Yamaguchi sarcoma viral related oncogene homolog
220892_s_at	1.38204	0.598202	C1orf25	2.31033	NM_021154 /// NM_058179		210788_s_at		deoxyuridine triphosphatase		DHRS7	dehydrogenase/reductase (SDR family) member 7
212141_at	1.71262	0.741469	MCM4	2.30977	NM_005914 /// NM_182746		210793_s_at		glutamate receptor, ionotropic, N-methyl D-aspartate-like 1A /// GRINL1A combined protein		NUP98	nucleoporin 98kDa
218361_at	1.28944	0.558385	HEBP1	2.30923	NM_018178		210835_s_at		calcium modulating ligand		CTBP2	C-terminal binding protein 2
203895_at	1.62956	0.706084	PLCB4	2.30789	NM_000933 /// NM_182797		210944_s_at		aurora kinase A		CAPN3	calpain 3, (p94)
203209_at	1.6006	0.693565	RFC5	2.30779	NM_007370 /// NM_181578		210983_s_at		lysophosphatidylglycerol acyltransferase 1		MCM7	minichromosome maintenance complex component 7
212368_at	1.28181	0.55555	ZNF292	2.30729	NM_015021		210990_s_at		polymerase (DNA directed), alpha 1		LAMA4	laminin, alpha 4
221502_at	1.40417	0.608683	UTP14A	2.3069	NM_002267		210994_x_at		RNA binding motif protein 35A		TRIM23	tripartite motif-containing 23
205909_at	1.89321	0.820709	POLE2	2.3068	NM_002692		210997_at		signal peptidase complex subunit 2 homolog (S. cerevisiae)		HGF	hepatocyte growth factor (hepapoietin A; scatter factor)
209549_s_at	1.54907	0.672674	DGUOK	2.30286	NM_080916 /// NM_080918		211016_x_at		Wolf-Hirschhorn syndrome candidate 1		HSPA4	heat shock 70kDa protein 4
205030_at	1.44058	0.625583	FABP7	2.30278	NM_001446		211023_at		degenerative spermatocyte homolog 1, lipid desaturase (Drosophila)		PDHB	pyruvate dehydrogenase (lipoamide) beta
204460_s_at	1.41382	0.614225	RAD1	2.3018	NM_002853 /// NM_133377		211043_s_at		transmembrane protein 97		CLTB	clathrin, light chain (Lcb)
204767_s_at	1.55809	0.677048	FEN1	2.3013	NM_004111		211075_s_at		forkhead box M1		CD47	CD47 molecule
204744_s_at	1.39342	0.605797	IARS	2.30014	NM_002161 /// NM_013417		211115_x_at		cyclin E2		SIP1	survival of motor neuron protein interacting protein 1
201901_s_at	1.44366	0.627692	YY1	2.29995	NM_003403		211136_s_at		zinc finger CCCH-type containing 14		CLPTM1	cleft lip and palate associated transmembrane protein 1
221940_at	1.42849	0.621136	WDR59	2.2998	NM_152260		211275_s_at		laminin, alpha 4		GYG1	glycogenin 1
214290_s_at	1.45041	0.630738	NOV	2.29954	NM_001040874 /// NM_003516		211285_s_at		solute carrier family 39 (zinc transporter), member 6		UBE3A	ubiquitin protein ligase E3A (human papilloma virus E6-associated protein, Angelman syndrome)
210389_x_at	1.47589	0.642404	TUBD1	2.29745	NM_016261		211370_s_at		coenzyme Q9 homolog (S. cerevisiae)		MAP2K5	mitogen-activated protein kinase kinase 5
220425_x_at	1.82533	0.794749	---	2.29673	NM_001012337 /// NM_017578		211450_s_at		citron (rho-interacting, serine/threonine kinase 21)		MSH6	mutS homolog 6 (E. coli)
204822_at	1.29343	0.563212	TTK	2.29653	NM_003318		211456_x_at		potassium large conductance calcium-activated channel, subfamily M, alpha member 1		MT1P2	metallothionein 1 pseudogene 2
203803_at	1.59118	0.692868	PCYOX1	2.29651	NM_016297		211519_s_at		GINS complex subunit 2 (Psf2 homolog)		KIF2C	kinesin family member 2C
212327_at	1.22954	0.535429	LIMCH1	2.29636	NM_001112717 /// NM_001112718 /// NM_001112719 /// NM_001112720 /// NM_014988		211566_x_at		RAB14, member RAS oncogene family		BRE	brain and reproductive organ-expressed (TNFRSF1A modulator)
218782_s_at	1.37868	0.600592	PANK2	2.29553	NM_014109		211571_s_at		nucleoporin 98kDa		VCAN	versican
205278_at	1.40085	0.610578	GAD1	2.2943	NM_000817 /// NM_013445		211609_x_at		TIP41, TOR signaling pathway regulator-like (S. cerevisiae)		PSMD4	proteasome (prosome, macropain) 26S subunit, non-ATPase, 4
212845_at	1.32601	0.578054	SAMD4A	2.29392	NM_015589		211615_s_at		BUB3 budding uninhibited by benzimidazoles 3 homolog (yeast)		LRPPRC	leucine-rich PPR-motif containing
205053_at	1.70157	0.74183	PRIM1	2.29375	NM_000946		211623_s_at		upstream binding protein 1 (LBP-1a)		FBL	fibrillarin
213610_s_at	1.52075	0.663115	SMPDL3A	2.29334	NM_144711		211630_s_at		chromosome 20 open reading frame 19		GSS	glutathione synthetase
203976_s_at	1.74172	0.759533	CHAF1A	2.29314	NM_005483		211675_s_at		non-SMC condensin II complex, subunit G2		MDFIC	MyoD family inhibitor domain containing
206632_s_at	1.37724	0.600944	APOBEC3B	2.2918	NM_004900		211713_x_at		phosphopantothenoylcysteine synthetase		KIAA0101	KIAA0101
218139_s_at	1.21283	0.529375	ZNF395	2.29106	NM_018229		211759_x_at		RAB GTPase activating protein 1		TBCB	tubulin folding cofactor B
218979_at	1.49719	0.653536	SLC35E3	2.29091	NM_024945		211761_s_at		RAB38, member RAS oncogene family		CACYBP	calcyclin binding protein
205133_s_at	1.38569	0.605166	HSPE1	2.28976	NM_002157		211814_s_at		ELOVL family member 6, elongation of long chain fatty acids (FEN1/Elo2, SUR4/Elo3-like, yeast)		CCNE2	cyclin E2
218653_at	1.68077	0.734183	MRPS33	2.28931	NM_014252		211833_s_at		BTB (POZ) domain containing 1		BAX	BCL2-associated X protein
217059_at	0.834882	0.364748	LOC100132302 /// VDAC1	2.28893	NM_152291		211890_x_at		protein phosphatase 4 (formerly X), catalytic subunit		CAPN3	calpain 3, (p94)
201752_s_at	1.29151	0.564425	ADD3	2.28818	NM_001121 /// NM_016824 /// NM_019903		211932_at		serine hydroxymethyltransferase 1 (soluble)		HNRNPA3	heterogeneous nuclear ribonucleoprotein A3
204254_s_at	1.97791	0.864446	VDR	2.28807	NM_000376 /// NM_001017535		211933_s_at		importin 7		HNRNPA3 /// HNRNPA3P1	heterogeneous nuclear ribonucleoprotein A3 pseudogene 1 /// heterogeneous nuclear ribonucleoprotein A3
218577_at	1.14279	0.499479	DTL	2.28796	NM_017768		212008_at		proteasomal ATPase-associated factor 1		UBXD2	UBX domain containing 2
214040_s_at	1.3818	0.604279	MBD4	2.2867	NM_000177 /// NM_198252		212009_s_at		ubiquitin specific peptidase 18		STIP1	stress-induced-phosphoprotein 1 (Hsp70/Hsp90-organizing protein)
218358_at	1.32751	0.580686	GOLPH3L	2.28611	NM_024324		212015_x_at		family with sequence similarity 49, member B		PTBP1	polypyrimidine tract binding protein 1
204962_s_at	1.41001	0.617196	CENPA	2.28454	NM_001042426 /// NM_001809		212033_at		ubiquitin specific peptidase 39		RBM25	RNA binding motif protein 25
201737_s_at	1.28574	0.562934	2008-03-06	2.28399	NM_005885		212037_at		cyclin A2		PNN	pinin, desmosome associated protein
203351_s_at	1.38417	0.606129	ORC4L	2.28362	NM_002552 /// NM_181741 /// NM_181742		212045_at		synaptotagmin binding, cytoplasmic RNA interacting protein		GLG1	golgi apparatus protein 1
208114_s_at	1.58142	0.692512	ISG20L2	2.2836	NM_030980		212047_s_at		cAMP responsive element modulator		RNF167	ring finger protein 167
211519_s_at	1.44144	0.631372	KIF2C	2.28303	NM_006845		212061_at		vaccinia related kinase 1		SR140	U2-associated SR140 protein
202052_s_at	1.4151	0.619919	RAI14	2.28272	NM_015577		212073_at		ubiquitin carboxyl-terminal hydrolase L5		CSNK2A1 /// CSNK2A1P	casein kinase 2, alpha 1 polypeptide /// casein kinase 2, alpha 1 polypeptide pseudogene
217884_at	1.36007	0.595877	CYBRD1	2.28247	NM_024662		212075_s_at		DEAD (Asp-Glu-Ala-Asp) box polypeptide 50		CSNK2A1	casein kinase 2, alpha 1 polypeptide
214941_s_at	1.34559	0.58981	APP	2.28139	NM_017892		212105_s_at		zinc finger RNA binding protein		DHX9	DEAH (Asp-Glu-Ala-His) box polypeptide 9
202629_at	1.2308	0.539762	APPBP2	2.28027	NM_006380		212107_s_at		tubulin folding cofactor B		DHX9	DEAH (Asp-Glu-Ala-His) box polypeptide 9
221039_s_at	1.4318	0.628588	PECR	2.27781	NM_018482		212131_at		replication protein A1, 70kDa		LSM14A	LSM14A, SCD6 homolog A (S. cerevisiae)
205393_s_at	1.82716	0.802224	CHEK1	2.27762	NM_001114121 /// NM_001114122 /// NM_001274		212138_at		programmed cell death 4 (neoplastic transformation inhibitor)		PDS5A	PDS5, regulator of cohesion maintenance, homolog A (S. cerevisiae)
221646_s_at	1.42825	0.627834	CCDC99	2.27488	NM_024786		212141_at		heterochromatin protein 1, binding protein 3		MCM4	minichromosome maintenance complex component 4
201417_at	1.46203	0.643167	SOX4	2.27318	NM_003107		212206_s_at		replication protein A3, 14kDa		H2AFV	H2A histone family, member V
218248_at	1.55989	0.686838	KRCC1	2.27112	NM_022074 /// NM_198847		212216_at		cleavage stimulation factor, 3' pre-RNA, subunit 2, 64kDa, tau variant		PREPL	prolyl endopeptidase-like
202188_at	1.4736	0.648914	NUP93	2.27088	NM_014669		212221_x_at		major histocompatibility complex, class II, DP alpha 1		IDS	iduronate 2-sulfatase (Hunter syndrome)
201512_s_at	1.30516	0.574828	TOMM70A	2.27051	NM_014820		212228_s_at		WW domain binding protein 11		COQ9	coenzyme Q9 homolog (S. cerevisiae)
205395_s_at	1.34335	0.591809	MRE11A	2.26991	NM_005590 /// NM_005591		212229_s_at		malignant T cell amplified sequence 1		FBXO21	F-box protein 21
218056_at	1.28754	0.567334	GGNBP2	2.26946	NM_016561		212244_at		cold inducible RNA binding protein		Gcom1 /// GRINL1A	glutamate receptor, ionotropic, N-methyl D-aspartate-like 1A /// GRINL1A combined protein
221550_at	1.33805	0.589608	LEF1	2.26939	NM_004376 /// NM_078470		212263_at		acyl-CoA thioesterase 9		QKI	quaking homolog, KH domain RNA binding (mouse)
211675_s_at	1.23576	0.544575	MDFIC	2.26922	NM_199072		212264_s_at		phosphoribosylaminoimidazole carboxylase, phosphoribosylaminoimidazole succinocarboxamide synthetase		WAPAL	wings apart-like homolog (Drosophila)
202276_at	1.45426	0.641001	SHFM1	2.26874	NM_006304		212265_at		TEA domain family member 4		QKI	quaking homolog, KH domain RNA binding (mouse)
217761_at	1.64558	0.725442	GOLM1	2.26838	NM_018269		212279_at		inversin		TMEM97	transmembrane protein 97
213168_at	1.44744	0.638126	SP3	2.26827	NM_001017371 /// NM_003111		212281_s_at		stress-induced-phosphoprotein 1 (Hsp70/Hsp90-organizing protein)		TMEM97	transmembrane protein 97
214608_s_at	1.18029	0.520363	MTMR2	2.26821	NM_000503 /// NM_172058 /// NM_172059 /// NM_172060		212282_at		RNA binding motif protein 25		TMEM97	transmembrane protein 97
204228_at	1.48424	0.654544	PPIH	2.2676	NM_006347		212299_at		S-phase kinase-associated protein 2 (p45)		NEK9	NIMA (never in mitosis gene a)- related kinase 9
217973_at	1.72465	0.760573	SEPX1	2.26756	NM_016286		212312_at		syntaxin binding protein 6 (amisyn)		BCL2L1	BCL2-like 1
214383_x_at	1.34374	0.592729	GMPS	2.26704	NM_057161		212327_at		heterogeneous nuclear ribonucleoprotein A3 pseudogene 1 /// heterogeneous nuclear ribonucleoprotein A3		LIMCH1	LIM and calponin homology domains 1
203344_s_at	1.40932	0.621914	RBBP8	2.2661	NM_002894 /// NM_203291 /// NM_203292		212328_at		cullin 2		LIMCH1	LIM and calponin homology domains 1
218695_at	1.52789	0.674311	LACTB2	2.26585	NM_019037		212368_at		KIAA0101		ZNF292	zinc finger protein 292
219494_at	1.42443	0.62892	DSN1	2.26489	NM_012415		212396_s_at		F-box protein 5		KIAA0090	KIAA0090
211370_s_at	1.38159	0.610093	MAP2K5	2.26456	NM_002757 /// NM_145160		212402_at		nucleoredoxin		ZC3H13	zinc finger CCCH-type containing 13
218773_s_at	1.39992	0.618588	ATAD2	2.26309	NM_012228		212405_s_at		mago-nashi homolog, proliferation-associated (Drosophila)		KIAA0859	KIAA0859
213236_at	1.33061	0.588367	SASH1	2.26154	NM_015278		212408_at		WD repeat and SOCS box-containing 1		TOR1AIP1	torsin A interacting protein 1
202372_at	1.35481	0.599313	RAB3GAP2	2.26061	NM_012414		212414_s_at		bifunctional apoptosis regulator		N-PAC /// SEPT6	septin 6 /// cytokine-like nuclear factor n-pac
221588_x_at	1.54954	0.685837	LOC728198 /// TAF9B	2.25935	NM_005589		212428_at		Rac GTPase activating protein 1		KIAA0368	KIAA0368
201664_at	1.33256	0.589933	SMC4	2.25883	NM_001002800 /// NM_005496		212432_at		LSM4 homolog, U6 small nuclear RNA associated (S. cerevisiae)		GRPEL1	GrpE-like 1, mitochondrial (E. coli)
203097_s_at	1.22322	0.54168	RAPGEF2	2.25821	NM_014247		212498_at		centrosomal protein 55kDa		---	Cri-du-chat region mRNA, clone NIBB11
206015_s_at	1.27361	0.564061	FOXJ3	2.25794	NM_014947		212499_s_at		small nuclear ribonucleoprotein polypeptide F		FCF1 /// MAPK1IP1L	FCF1 small subunit (SSU) processome component homolog (S. cerevisiae) /// mitogen-activated protein kinase 1 interacting protein 1-like
201277_s_at	1.44767	0.641445	HNRNPAB	2.25689	NM_004499 /// NM_031266		212506_at		fasciculation and elongation protein zeta 2 (zygin II)		PICALM	phosphatidylinositol binding clathrin assembly protein
34031_i_at	1.22984	0.544961	DHFR	2.25676	NM_001013406 /// NM_004912 /// NM_194454 /// NM_194455 /// NM_194456		212508_at		phospholipid scramblase 1		MOAP1	modulator of apoptosis 1
222039_at	1.47457	0.653595	ATF1	2.2561	NM_001080443		212533_at		proteasome (prosome, macropain) 26S subunit, ATPase, 3		WEE1	WEE1 homolog (S. pombe)
214773_x_at	1.25394	0.556026	BRWD1	2.25517	NM_001031800 /// NM_152902		212593_s_at		kazrin		PDCD4	programmed cell death 4 (neoplastic transformation inhibitor)
212047_s_at	1.30878	0.580523	RNF167	2.25449	NM_015528		212621_at		aspartylglucosaminidase		TMEM194	transmembrane protein 194
204930_s_at	1.29839	0.575969	BNIP1	2.25427	NM_001205 /// NM_013978 /// NM_013979 /// NM_013980		212623_at		ATP synthase, H+ transporting, mitochondrial F0 complex, subunit G		TMEM41B	transmembrane protein 41B
202743_at	1.68712	0.748678	PIK3R3	2.25346	NM_001114172 /// NM_003629		212627_s_at		LSM14A, SCD6 homolog A (S. cerevisiae)		EXOSC7	exosome component 7
211450_s_at	1.44791	0.642861	MSH6	2.2523	NM_000179		212631_at		KIAA0859		STX7	syntaxin 7
201316_at	1.57906	0.701403	PSMA2	2.25128	NM_002787		212643_at		golgi SNAP receptor complex member 1		MAPK1IP1L	mitogen-activated protein kinase 1 interacting protein 1-like
217889_s_at	1.44381	0.641413	DSG2	2.25098	NM_024843		212645_x_at		protein (peptidylprolyl cis/trans isomerase) NIMA-interacting, 4 (parvulin)		BRE	brain and reproductive organ-expressed (TNFRSF1A modulator)
212263_at	1.32916	0.590594	QKI	2.25054	NM_006775 /// NM_206853 /// NM_206854 /// NM_206855		212675_s_at		topoisomerase (DNA) II binding protein 1		CEP68	centrosomal protein 68kDa
210460_s_at	1.36681	0.607396	PSMD4	2.25028	NM_002810		212677_s_at		phosphatidylinositol glycan anchor biosynthesis, class C		CEP68	centrosomal protein 68kDa
208715_at	1.22828	0.545886	TMCO1	2.25006	NM_019026		212694_s_at		synaptosomal-associated protein, 23kDa		PCCB	propionyl Coenzyme A carboxylase, beta polypeptide
212282_at	1.52566	0.678098	TMEM97	2.24991	NM_014573		212714_at		high-mobility group nucleosome binding domain 1		LARP4	La ribonucleoprotein domain family, member 4
201504_s_at	1.4631	0.650322	TSN	2.24982	NM_004622		212718_at		integral membrane protein 2B		PAPOLA	poly(A) polymerase alpha
219286_s_at	1.30245	0.578936	KIF15	2.24973	NM_022768		212720_at		retinol dehydrogenase 14 (all-trans/9-cis/11-cis) /// 5'-nucleotidase, cytosolic IB		PAPOLA	poly(A) polymerase alpha
212730_at	1.60161	0.712401	DMN	2.24819	NM_015286 /// NM_145728		212730_at		pinin, desmosome associated protein		DMN	desmuslin
204023_at	1.42568	0.634302	RFC4	2.24763	NM_002916 /// NM_181573		212731_at		coatomer protein complex, subunit alpha		ANKRD46	ankyrin repeat domain 46
201175_at	1.77441	0.789589	TXNDC14	2.24725	NM_015959		212745_s_at		cytoplasmic FMR1 interacting protein 2		BBS4	Bardet-Biedl syndrome 4
212414_s_at	1.23465	0.549407	N-PAC /// SEPT6	2.24724	NM_015129 /// NM_032569 /// NM_145799 /// NM_145800 /// NM_145802		212746_s_at		SWAP-70 protein		CEP170	centrosomal protein 170kDa
219000_s_at	1.93872	0.862929	RRP15	2.24668	NM_024094		212749_s_at		iduronate 2-sulfatase (Hunter syndrome)		RCHY1	ring finger and CHY zinc finger domain containing 1
219412_at	1.29824	0.577852	PSMD10	2.24667	NM_022337		212761_at		WD repeat domain 67		TCF7L2	transcription factor 7-like 2 (T-cell specific, HMG-box)
204216_s_at	1.38484	0.616961	ZC3H14	2.24461	NM_024824 /// NM_207660 /// NM_207661 /// NM_207662		212764_at		ornithine decarboxylase 1		ZEB1	zinc finger E-box binding homeobox 1
207405_s_at	1.32625	0.590951	RAD17	2.24427	NM_002873 /// NM_133338 /// NM_133339 /// NM_133340 /// NM_133341 /// NM_133342 /// NM_133343 /// NM_133344		212766_s_at		maternal embryonic leucine zipper kinase		ISG20L2	interferon stimulated exonuclease gene 20kDa-like 2
203200_s_at	1.32241	0.589395	MTRR	2.24367	NM_002454 /// NM_024010		212767_at		non-metastatic cells 7, protein expressed in (nucleoside-diphosphate kinase)		MTG1	mitochondrial GTPase 1 homolog (S. cerevisiae)
218303_x_at	1.73294	0.773095	GALNT7	2.24156	NM_016618		212774_at		phosphatidylinositol glycan anchor biosynthesis, class K		ZNF238	zinc finger protein 238
200040_at	1.32062	0.589258	KHDRBS1	2.24116	NM_006559		212801_at		synaptic vesicle glycoprotein 2A		CIT	citron (rho-interacting, serine/threonine kinase 21)
209896_s_at	1.29857	0.579554	PTPN11	2.24064	NM_002834		212802_s_at		solute carrier family 29 (nucleoside transporters), member 1		GAPVD1	GTPase activating protein and VPS9 domains 1
203177_x_at	1.33222	0.594931	TFAM	2.23928	NM_003201		212810_s_at		discs, large homolog 7 (Drosophila)		SLC1A4	solute carrier family 1 (glutamate/neutral amino acid transporter), member 4
220744_s_at	1.30999	0.585171	C1orf112	2.23864	NM_018262 /// NM_052985 /// NM_052989 /// NM_052990		212845_at		growth hormone receptor		SAMD4A	sterile alpha motif domain containing 4A
212265_at	1.29835	0.580162	QKI	2.23791	NM_006775 /// NM_206853 /// NM_206854 /// NM_206855		212855_at		development and differentiation enhancing factor 1		DCUN1D4	DCN1, defective in cullin neddylation 1, domain containing 4 (S. cerevisiae)
217848_s_at	1.40615	0.62847	TNS3	2.23741	NM_021129		212905_at		metallothionein 1 pseudogene 2		CSTF2T	cleavage stimulation factor, 3' pre-RNA, subunit 2, 64kDa, tau variant
203967_at	1.47688	0.660242	CDC6	2.23688	NM_001254		212919_at		hyaluronan and proteoglycan link protein 1		DCP2	DCP2 decapping enzyme homolog (S. cerevisiae)
217735_s_at	1.39842	0.625239	ADI1	2.23662	NM_014413		212943_at		meiosis-specific nuclear structural 1		KIAA0528	KIAA0528
204247_s_at	1.49357	0.667853	CDK5	2.23637	NM_004935		212949_at		protein kinase, cAMP-dependent, regulatory, type II, beta		NCAPH	non-SMC condensin I complex, subunit H
212767_at	1.45257	0.649528	MTG1	2.23634	NM_138384		212955_s_at		protein tyrosine phosphatase-like A domain containing 1		POLR2I	polymerase (RNA) II (DNA directed) polypeptide I, 14.5kDa
203148_s_at	1.46746	0.656515	TRIM14	2.23523	NM_014788 /// NM_033219 /// NM_033220 /// NM_033221		212973_at		neuroepithelial cell transforming gene 1		RPIA	ribose 5-phosphate isomerase A (ribose 5-phosphate epimerase)
222203_s_at	1.45479	0.650933	KRIT1	2.23493	NM_001002006 /// NM_020905 /// NM_033253		212996_s_at		three prime repair exonuclease 2 /// UCHL5 interacting protein		URB1	URB1 ribosome biogenesis 1 homolog (S. cerevisiae)
205433_at	1.4127	0.632203	BCHE	2.23456	NM_000055		213007_at		FCF1 small subunit (SSU) processome component homolog (S. cerevisiae) /// mitogen-activated protein kinase 1 interacting protein 1-like		FANCI	Fanconi anemia, complementation group I
216033_s_at	1.35686	0.607249	AGA	2.23444	NM_002037 /// NM_153047 /// NM_153048		213008_at		phosphatidylinositol glycan anchor biosynthesis, class F		FANCI	Fanconi anemia, complementation group I
218217_at	1.17582	0.52626	TNKS2	2.2343	NM_021626		213009_s_at		exosome component 4		TRIM37	tripartite motif-containing 37
217356_s_at	1.40026	0.627049	ZNF227	2.2331	NM_000291		213016_at		G protein beta subunit-like		---	ARTC1 mRNA, complete sequence
217947_at	1.33737	0.598915	C16orf80	2.23299	NM_017801		213064_at		integrator complex subunit 7		ZC3H14	zinc finger CCCH-type containing 14
218809_at	1.31816	0.590389	ARRB1	2.2327	NM_024960 /// NM_153638 /// NM_153640		213097_s_at		N-acetylgalactosaminidase, alpha-		ZRF1	zuotin related factor 1
219356_s_at	1.13686	0.509369	IFT81	2.2319	NM_016410		213111_at		survival motor neuron domain containing 1		PIP5K3	phosphatidylinositol-3-phosphate/phosphatidylinositol 5-kinase, type III
210502_s_at	1.4096	0.6317	PPIE	2.23145	NM_006112 /// NM_203456 /// NM_203457		213129_s_at		cleft lip and palate associated transmembrane protein 1		GCSH /// LOC730107	glycine cleavage system protein H (aminomethyl carrier) /// similar to Glycine cleavage system H protein, mitochondrial
209143_s_at	1.46924	0.658779	CLNS1A	2.23025	NM_001293		213132_s_at		PDS5, regulator of cohesion maintenance, homolog A (S. cerevisiae)		MCAT	malonyl CoA:ACP acyltransferase (mitochondrial)
208714_at	1.36705	0.612993	NDUFV1	2.23012	NM_007103		213168_at		ubiquitin specific peptidase 1		SP3	Sp3 transcription factor
209608_s_at	1.49145	0.669099	ACAT2	2.22905	NM_005891		213208_at		neuronal pentraxin II		KIAA0240	KIAA0240
212802_s_at	1.23213	0.553365	GAPVD1	2.22662	NM_015635		213222_at		hairy/enhancer-of-split related with YRPW motif 1		PLCB1	phospholipase C, beta 1 (phosphoinositide-specific)
209572_s_at	1.32826	0.596578	EED	2.22647	NM_003797 /// NM_152991		213226_at		jumonji domain containing 2B		CCNA2	cyclin A2
209085_x_at	1.33775	0.601747	RFC1	2.22311	NM_002913		213236_at		myosin regulatory light chain interacting protein		SASH1	SAM and SH3 domain containing 1
213413_at	1.89696	0.853418	STON1	2.22278	NM_006873		213268_at		mitochondrial trans-2-enoyl-CoA reductase		CAMTA1	calmodulin binding transcription activator 1
203333_at	1.38916	0.624994	KIFAP3	2.22267	NM_014970		213313_at		solute carrier family 35, member A5		RABGAP1	RAB GTPase activating protein 1
214107_x_at	1.5051	0.677363	C19orf2	2.222	XM_001725426 /// XM_001725441		213322_at		glycogenin 1		C6orf130	chromosome 6 open reading frame 130
205110_s_at	1.43732	0.646963	FGF13	2.22164	NM_004114 /// NM_033642		213330_s_at		Der1-like domain family, member 1		STIP1	stress-induced-phosphoprotein 1 (Hsp70/Hsp90-organizing protein)
208847_s_at	1.38612	0.623933	ADH5	2.22158	NM_000671		213355_at		ATP-binding cassette, sub-family D (ALD), member 3		ST3GAL6	ST3 beta-galactoside alpha-2,3-sialyltransferase 6
209431_s_at	1.56262	0.703594	PATZ1	2.22091	NM_014323 /// NM_032050 /// NM_032051 /// NM_032052		213399_x_at		splicing factor, arginine/serine-rich 7, 35kDa		RPN2	ribophorin II
208731_at	1.33224	0.600046	RAB2A	2.22023	NM_002865		213413_at		C-terminal binding protein 2		STON1	stonin 1
200897_s_at	1.62294	0.731142	PALLD	2.21973	NM_016081		213465_s_at		minichromosome maintenance complex component 5		PPP1R7	protein phosphatase 1, regulatory (inhibitor) subunit 7
208839_s_at	1.2077	0.544159	CAND1	2.21939	NM_018448		213473_at		NEDD4 binding protein 1		BRAP	BRCA1 associated protein
204808_s_at	1.36836	0.616867	TMEM5	2.21823	NM_014254		213474_at		replication protein A2, 32kDa		RP1-21O18.1	kazrin
205376_at	1.77414	0.800008	INPP4B	2.21766	NM_001101669 /// NM_003866		213478_at		NDC80 homolog, kinetochore complex component (S. cerevisiae)		NPTX2	neuronal pentraxin II
208795_s_at	1.61355	0.72846	MCM7	2.21501	NM_005916 /// NM_182776		213479_at		cell division cycle 6 homolog (S. cerevisiae)		PPWD1	peptidylprolyl isomerase domain and WD repeat containing 1
209426_s_at	1.40804	0.635853	AMACR /// C1QTNF3	2.21441	NM_014324 /// NM_030945 /// NM_181435 /// NM_203382		213483_at		v-yes-1 Yamaguchi sarcoma viral related oncogene homolog		HLA-DPA1	major histocompatibility complex, class II, DP alpha 1
217854_s_at	1.37477	0.621101	RNF130	2.21344	NM_002695		213537_at		CUG triplet repeat, RNA binding protein 2		ALDH7A1	aldehyde dehydrogenase 7 family, member A1
205066_s_at	1.38673	0.626715	ENPP1	2.2127	NM_006208		213591_at		anthrax toxin receptor 1		ARHGDIA	Rho GDP dissociation inhibitor (GDI) alpha
201377_at	1.3444	0.607899	UBAP2L	2.21156	NM_014847		213606_s_at		phosphatidic acid phosphatase type 2B		KLHL23	kelch-like 23 (Drosophila)
212264_s_at	1.26467	0.571874	WAPAL	2.21145	NM_015045		213610_s_at		fukutin		SMPDL3A	sphingomyelin phosphodiesterase, acid-like 3A
208661_s_at	1.26924	0.573971	TTC3	2.21133	NM_001001894 /// NM_003316		213624_at		DEAD (Asp-Glu-Ala-Asp) box polypeptide 18		SLC1A1	solute carrier family 1 (neuronal/epithelial high affinity glutamate transporter, system Xag), member 1
219277_s_at	1.27063	0.575145	RBM15	2.20924	NM_018245		213664_at		RAD51 homolog C (S. cerevisiae)		C12orf29	chromosome 12 open reading frame 29
204618_s_at	1.32358	0.599132	GABPB2	2.20917	NM_002041 /// NM_005254 /// NM_016654 /// NM_016655 /// NM_181427		213701_at		GrpE-like 1, mitochondrial (E. coli)		SMARCA4	SWI/SNF related, matrix associated, actin dependent regulator of chromatin, subfamily a, member 4
218715_at	1.4486	0.65583	CENPM	2.2088	NM_018428		213720_s_at		DEAD (Asp-Glu-Ala-Asp) box polypeptide 24		XYLT1	xylosyltransferase I
219148_at	1.38554	0.627348	C14orf122	2.20857	NM_018492		213725_x_at		Fanconi anemia, complementation group I		PRPF40A	PRP40 pre-mRNA processing factor 40 homolog A (S. cerevisiae)
214336_s_at	1.27237	0.576311	KLHDC3	2.20779	NM_001098398 /// NM_004371		213729_at		trafficking protein particle complex 2-like		FAM149B1	family with sequence similarity 149, member B1
216870_x_at	1.42334	0.645271	PDE6D	2.2058	NR_002612		213896_x_at		aldehyde dehydrogenase 6 family, member A1		ATP5S	ATP synthase, H+ transporting, mitochondrial F0 complex, subunit s (factor B)
200740_s_at	1.40471	0.636846	SUMO3	2.20573	NM_006936		213995_at		WD repeat domain 41		DDX17	DEAD (Asp-Glu-Ala-Asp) box polypeptide 17
211571_s_at	1.5195	0.688892	VCAN	2.20571	NM_001126336 /// NM_004385		213998_s_at		RAP1, GTP-GDP dissociation stimulator 1		GSN	gelsolin (amyloidosis, Finnish type)
212206_s_at	1.26102	0.571981	H2AFV	2.20466	NM_012412 /// NM_138635 /// NM_201436 /// NM_201516 /// NM_201517		214040_s_at		BUB1 budding uninhibited by benzimidazoles 1 homolog beta (yeast)		MBD4	methyl-CpG binding domain protein 4
37966_at	1.48555	0.674269	ALDH6A1	2.2032	NM_001003828 /// NM_013327		214047_s_at		interferon regulatory factor 2		WDR67	WD repeat domain 67
205590_at	1.41725	0.643648	RASGRP1	2.2019	NM_005739		214061_at		nucleoporin 98kDa		LOC100132532	hypothetical protein LOC100132532
214451_at	2.04378	0.928287	CAPN3	2.20167	NM_003221		214083_at		HIRA interacting protein 3		LOC440434	hypothetical protein FLJ11822
220587_s_at	1.67082	0.759019	OSGEPL1	2.20129	NM_022372		214107_x_at		poly(A) polymerase alpha		C19orf2	chromosome 19 open reading frame 2
217678_at	1.38914	0.631214	SERBP1	2.20074	NM_014331		214173_x_at		tubulin, gamma complex associated protein 3		PIN4	protein (peptidylprolyl cis/trans isomerase) NIMA-interacting, 4 (parvulin)
218568_at	1.22466	0.556515	LRRC40	2.20059	NM_018238		214224_s_at		transcription factor-like 5 (basic helix-loop-helix)		HIST2H2AA3 /// HIST2H2AA4	histone cluster 2, H2aa3 /// histone cluster 2, H2aa4
218313_s_at	1.22505	0.55699	STYXL1	2.19941	NM_017423		214290_s_at		Rho GTPase activating protein 6		NOV	nephroblastoma overexpressed gene
203042_at	1.25263	0.569535	LAMP2	2.19938	NM_001122606 /// NM_002294 /// NM_013995		214321_at		G protein-coupled receptor kinase 5		TSFM	Ts translation elongation factor, mitochondrial
221215_s_at	1.51558	0.689114	FZD5	2.19931	NM_020639		214331_at		nucleoporin 37kDa		DAZAP2	DAZ associated protein 2
208784_s_at	1.47969	0.672923	KLHDC3	2.1989	NM_057161		214334_x_at		cullin-associated and neddylation-dissociated 1		COPA	coatomer protein complex, subunit alpha
212408_at	1.44744	0.6583	TOR1AIP1	2.19876	NM_015602		214336_s_at		pumilio homolog 1 (Drosophila)		KLHDC3	kelch domain containing 3
212621_at	1.47732	0.672435	TMEM194	2.19697	NM_015257		214383_x_at		deoxythymidylate kinase (thymidylate kinase) /// similar to Deoxythymidylate kinase (thymidylate kinase)		GMPS	guanine monphosphate synthetase
204295_at	1.5392	0.700789	SURF1	2.19638	NM_003172		214431_at		tubulin folding cofactor B		BIN1	bridging integrator 1
209798_at	1.473	0.670656	NPAT	2.19636	NM_002519		214439_x_at		translocase of outer mitochondrial membrane 22 homolog (yeast)		TFAP2B	transcription factor AP-2 beta (activating enhancer binding protein 2 beta)
202959_at	1.37532	0.626199	MUT	2.19629	NM_000255		214451_at		transmembrane protein 33		CAPN3	calpain 3, (p94)
201535_at	1.30315	0.593387	UBL3	2.19613	NM_007106		214475_x_at		hyaluronan-mediated motility receptor (RHAMM)		SGCD	sarcoglycan, delta (35kDa dystrophin-associated glycoprotein)
203432_at	1.79972	0.819643	TMPO	2.19573	NM_001032283 /// NM_001032284 /// NM_003276		214492_at		cysteine-rich with EGF-like domains 2		H2AFY	H2A histone family, member Y
218917_s_at	1.38105	0.628985	TMEM106B	2.19569	NM_006015 /// NM_139135		214500_at		poly(A) binding protein interacting protein 1		EYA1	eyes absent homolog 1 (Drosophila)
203560_at	1.35661	0.618199	GGH	2.19446	NM_003878		214608_s_at		dom-3 homolog Z (C. elegans)		MTMR2	myotubularin related protein 2
213330_s_at	1.42851	0.651141	STIP1	2.19385	NM_006819		214649_s_at		non-SMC condensin I complex, subunit H		NOTCH2NL	Notch homolog 2 (Drosophila) N-terminal like
213729_at	1.34345	0.612714	FAM149B1	2.19263	NM_017892		214722_at		high mobility group nucleosomal binding domain 3		RRP15	ribosomal RNA processing 15 homolog (S. cerevisiae)
212396_s_at	1.49427	0.681558	KIAA0090	2.19243	NM_015047		214764_at		dodecenoyl-Coenzyme A delta isomerase (3,2 trans-enoyl-Coenzyme A isomerase)		TIPRL	TIP41, TOR signaling pathway regulator-like (S. cerevisiae)
201770_at	1.3931	0.635422	SNRPA	2.1924	NM_004596		214773_x_at		ST8 alpha-N-acetyl-neuraminide alpha-2,8-sialyltransferase 1		BRWD1	bromodomain and WD repeat domain containing 1
209432_s_at	1.22505	0.559052	CREB3	2.1913	NM_006368		214820_at		ribose 5-phosphate isomerase A (ribose 5-phosphate epimerase)		---	Clone 23548 mRNA sequence
220319_s_at	1.55187	0.708292	ROPN1 /// ROPN1B	2.191	NM_013262		214848_at		solute carrier organic anion transporter family, member 4A1 /// similar to Solute carrier organic anion transporter family, member 4A1		PRPF40A	PRP40 pre-mRNA processing factor 40 homolog A (S. cerevisiae)
201532_at	1.35421	0.618255	PSMA3	2.19038	NM_002788 /// NM_152132		214941_s_at		centromere protein E, 312kDa		APP	amyloid beta (A4) precursor protein (peptidase nexin-II, Alzheimer disease)
221958_s_at	1.58518	0.723739	FAM134A	2.19026	NM_001002292 /// NM_024911		214953_s_at		RNA binding motif protein 10		FEZ2	fasciculation and elongation protein zeta 2 (zygin II)
220688_s_at	1.22258	0.558317	DHRS7B	2.18976	NM_016183		215000_s_at		cyclin E2		---	CDNA: FLJ23070 fis, clone LNG05629
204128_s_at	1.55262	0.709117	RFC3	2.18952	NM_002915 /// NM_181558		215079_at		DEK oncogene (DNA binding)		RBM10	RNA binding motif protein 10
207233_s_at	1.21862	0.556756	MITF	2.18878	NM_000248 /// NM_006722 /// NM_198158 /// NM_198159 /// NM_198177 /// NM_198178		215089_s_at		REV3-like, catalytic subunit of DNA polymerase zeta (yeast)		GOLGA4	golgi autoantigen, golgin subfamily a, 4
213132_s_at	1.46391	0.669319	MCAT	2.18716	NM_014507 /// NM_173467		215203_at		BTB (POZ) domain containing 2		EIF3C /// EIF3CL	eukaryotic translation initiation factor 3, subunit C /// eukaryotic translation initiation factor 3, subunit C-like
213208_at	1.33461	0.610223	KIAA0240	2.18708	NM_015349		215230_x_at		cyclin A2		NKTR	natural killer-tumor recognition sequence
212810_s_at	1.53058	0.699873	SLC1A4	2.18695	NM_003038		215338_s_at		CD47 molecule		TRAF3IP2	TRAF3 interacting protein 2
216973_s_at	1.43051	0.65419	MUC7	2.18669	NM_004502		215411_s_at		non-SMC condensin I complex, subunit D2		GSPT1	G1 to S phase transition 1
205329_s_at	1.24832	0.571246	SNX4	2.18526	NM_003794		215438_x_at		jumonji domain containing 2D		BUB1	BUB1 budding uninhibited by benzimidazoles 1 homolog (yeast)
210410_s_at	1.50205	0.687408	C6orf26 /// MSH5	2.18509	NM_001039651 /// NM_002441 /// NM_025259 /// NM_172165 /// NM_172166		215509_s_at		cAMP responsive element binding protein 1		PYGO1	pygopus homolog 1 (Drosophila)
221641_s_at	1.22164	0.559105	CORO1C	2.18498	NM_001033583 /// NM_001037171		215517_at		zinc finger, DHHC-type containing 11		JMJD2B	jumonji domain containing 2B
203334_at	1.28999	0.590462	DHX8	2.18472	NM_004941		215616_s_at		transmembrane protein 5		DLEU2 /// DLEU2L	deleted in lymphocytic leukemia, 2 /// deleted in lymphocytic leukemia 2-like
220298_s_at	1.24404	0.569531	N6AMT1	2.18432	NM_019073		215629_s_at		chromosome 6 open reading frame 108		C1orf41	chromosome 1 open reading frame 41
215438_x_at	1.374	0.629034	BUB1	2.18431	NM_002094		215691_x_at		clathrin interactor 1		TSC2	tuberous sclerosis 2
212073_at	1.51656	0.694317	CSNK2A1 /// CSNK2A1P	2.18425	NM_001895 /// NM_177559 /// NM_177560 /// NR_002207		215735_s_at		PRKC, apoptosis, WT1, regulator		CYFIP2	cytoplasmic FMR1 interacting protein 2
218341_at	1.26412	0.579356	ZWILCH	2.18194	NM_001077447 /// NM_024664		215785_s_at		guanine nucleotide binding protein (G protein), beta 5		DOM3Z	dom-3 homolog Z (C. elegans)
208956_x_at	1.49963	0.687294	DUT	2.18194	NM_001025248 /// NM_001025249 /// NM_001948		215982_s_at		calpain 3, (p94)		FYN	FYN oncogene related to SRC, FGR, YES
202371_at	1.40884	0.645912	TCEAL4	2.18117	NM_001006935 /// NM_001006936 /// NM_001006937 /// NM_024863		216033_s_at		neural precursor cell expressed, developmentally down-regulated 9		AGA	aspartylglucosaminidase
218046_s_at	1.45035	0.664976	PRPF40A	2.18106	NM_016065		216064_s_at		peroxisome biogenesis factor 1		TOR1AIP1	torsin A interacting protein 1
203963_at	1.59783	0.733029	CA12	2.17977	NM_001218 /// NM_206925		216100_s_at		serum/glucocorticoid regulated kinase family, member 3 /// chromosome 8 open reading frame 44		TBCB	tubulin folding cofactor B
201345_s_at	1.42499	0.653843	UBE2D2	2.17941	NM_003339 /// NM_181838		216194_s_at		gap junction protein, beta 1, 32kDa		MAP3K4	mitogen-activated protein kinase kinase kinase 4
204831_at	1.2017	0.551566	CDK8	2.1787	NM_001260		216199_s_at		SUB1 homolog (S. cerevisiae)		WDHD1	WD repeat and HMG-box DNA binding protein 1
213111_at	1.32535	0.608972	PIP5K3	2.17637	NM_015040 /// NM_152671		216228_s_at		RNA pseudouridylate synthase domain containing 2		MCM5	minichromosome maintenance complex component 5
202562_s_at	1.50752	0.693042	C14orf1	2.17522	NM_007176		216237_s_at		NDRG family member 3 /// heterogeneous nuclear ribonucleoprotein A3 pseudogene 2		TCEA1	transcription elongation factor A (SII), 1
208775_at	1.24922	0.574307	XPO1	2.17518	NM_003400		216241_s_at		kinesin family member 23		NR3C1	nuclear receptor subfamily 3, group C, member 1 (glucocorticoid receptor)
210053_at	1.25119	0.57534	TAF5	2.17469	NM_006951		216321_s_at		POT1 protection of telomeres 1 homolog (S. pombe)		SEC23IP	SEC23 interacting protein
208993_s_at	1.4652	0.673794	PPIG	2.17455	NM_004792		216392_s_at		propionyl Coenzyme A carboxylase, beta polypeptide		SF3A1	splicing factor 3a, subunit 1, 120kDa
219555_s_at	1.21421	0.558399	CYP20A1	2.17446	NM_001100624 /// NM_001100625 /// NM_018455		216457_s_at		tripartite motif-containing 23		IGF2BP3 /// LOC645468	insulin-like growth factor 2 mRNA binding protein 3 /// similar to putative RNA binding protein KOC
215411_s_at	1.39232	0.640502	GSPT1	2.17379	NM_147200 /// NM_147686		216493_s_at		UTP6, small subunit (SSU) processome component, homolog (yeast)		hCG_1776980 /// SDHC	succinate dehydrogenase complex, subunit C, integral membrane protein, 15kDa /// hCG1776980
202467_s_at	1.29585	0.596498	COPS2	2.17243	NM_004236		216591_s_at		ribonucleotide reductase M2 polypeptide		FARSA	phenylalanyl-tRNA synthetase, alpha subunit
216321_s_at	1.08162	0.498525	SEC23IP	2.16965	NM_000176 /// NM_001018074 /// NM_001018075 /// NM_001018076 /// NM_001018077 /// NM_001020825 /// NM_001024094		216602_s_at		reversion-inducing-cysteine-rich protein with kazal motifs		DLEU2	deleted in lymphocytic leukemia, 2
203033_x_at	1.32808	0.612172	FH	2.16946	NM_000143		216870_x_at		translin		PDE6D	phosphodiesterase 6D, cGMP-specific, rod, delta
212718_at	1.25193	0.577457	PAPOLA	2.16801	NM_032632		216883_x_at		signal transducer and activator of transcription 1, 91kDa		HOXB7	homeobox B7
200646_s_at	1.45496	0.671449	NUCB1	2.16689	NM_006184		216973_s_at		leucine-rich PPR-motif containing		MUC7	mucin 7, secreted
218856_at	1.42251	0.657082	DEPDC6	2.16489	NM_014452		217059_at		nucleoporin 62kDa		LOC100132302 /// VDAC1	voltage-dependent anion channel 1 /// similar to Voltage-dependent anion-selective channel protein 1 (VDAC-1) (hVDAC1) (Outer mitochondrial membrane protein porin 1) (Plasmalemmal porin) (Porin 31HL) (Porin 31HM)
206770_s_at	1.11298	0.514185	SLC35A3	2.16455	NM_012243		217140_s_at		flotillin 1		MT1F	metallothionein 1F
209053_s_at	1.28869	0.595418	WHSC1	2.16434	NM_001042424 /// NM_007331 /// NM_133330 /// NM_133331 /// NM_133334 /// NM_133335		217165_x_at		cyclin F		RBM10	RNA binding motif protein 10
200991_s_at	1.2485	0.577282	SNX17	2.16272	NM_014748		217221_x_at		general transcription factor IIH, polypeptide 1, 62kDa		HNRNPA3P2 /// NDRG3	NDRG family member 3 /// heterogeneous nuclear ribonucleoprotein A3 pseudogene 2
202932_at	1.43563	0.663862	YES1	2.16255	NM_005433		217286_s_at		nucleolar protein 3 (apoptosis repressor with CARD domain)		PGK1	phosphoglycerate kinase 1
207332_s_at	1.28383	0.593721	TFRC	2.16234	NM_003234		217356_s_at		SH3 domain containing, Ysc84-like 1 (S. cerevisiae)		ZNF227	zinc finger protein 227
200973_s_at	1.40378	0.649324	TSPAN3	2.16191	NM_005724 /// NM_198902		217403_s_at		hepatocyte growth factor (hepapoietin A; scatter factor)		RAP1GDS1	RAP1, GTP-GDP dissociation stimulator 1
209162_s_at	1.43762	0.665007	PRPF4	2.16181	NM_004697		217457_s_at		kinesin family member 14		NFATC2IP	nuclear factor of activated T-cells, cytoplasmic, calcineurin-dependent 2 interacting protein
201807_at	1.25773	0.581885	VPS26A	2.16147	NM_001035260 /// NM_004896		217526_at		BRCA1 associated protein		C18orf24	chromosome 18 open reading frame 24
212731_at	1.32222	0.61215	ANKRD46	2.15997	NM_198401		217640_x_at		biliverdin reductase A		SLC7A11	solute carrier family 7, (cationic amino acid transporter, y+ system) member 11
201758_at	1.30557	0.604485	TSG101	2.1598	NM_006292		217678_at		phospholipase C, beta 1 (phosphoinositide-specific)		SERBP1	SERPINE1 mRNA binding protein 1
221584_s_at	1.67544	0.775817	ALDH6A1	2.15958	NM_001014797 /// NM_002247		217725_x_at		centrosomal protein 57kDa		ITM2B	integral membrane protein 2B
201599_at	1.23771	0.573322	OAT	2.15885	NM_000274		217731_s_at		interferon stimulated exonuclease gene 20kDa-like 2		EIF2AK1	eukaryotic translation initiation factor 2-alpha kinase 1
204681_s_at	1.31016	0.60689	RAPGEF5	2.15882	NM_012294		217735_s_at		SID1 transmembrane family, member 2		ADI1	acireductone dioxygenase 1
213624_at	1.31222	0.607862	SLC1A1	2.15874	NM_006714		217761_at		solute carrier family 24 (sodium/potassium/calcium exchanger), member 1		GOLM1	golgi membrane protein 1
212508_at	1.27846	0.592259	MOAP1	2.15862	NM_022151		217771_at		BCL2-related protein A1		MTCH2	mitochondrial carrier homolog 2 (C. elegans)
209180_at	1.43438	0.664574	RABGGTB	2.15834	NM_004582		217772_s_at		Ts translation elongation factor, mitochondrial		PTPLAD1	protein tyrosine phosphatase-like A domain containing 1
210589_s_at	1.51815	0.703718	GBA /// GBAP	2.15733	NM_000157 /// NM_001005741 /// NM_001005742 /// NM_001005749 /// NM_001005750 /// NR_002188 /// XR_042183		217777_s_at		acylglycerol kinase		PRMT5	protein arginine methyltransferase 5
221771_s_at	1.31042	0.607457	FAM45A /// FAM45B	2.15722	NM_017520		217786_at		---		WBP11	WW domain binding protein 11
217165_x_at	1.4253	0.660757	RBM10	2.15708	NM_005949		217822_at		four jointed box 1 (Drosophila)		USP39	ubiquitin specific peptidase 39
201112_s_at	1.36585	0.633286	CSE1L	2.15677	NM_001316		217829_s_at		H1 histone family, member 0		SYNCRIP	synaptotagmin binding, cytoplasmic RNA interacting protein
216493_s_at	1.30689	0.606039	hCG_1776980 /// SDHC	2.15645	NM_006547 /// XR_017635 /// XR_038251 /// XR_039797		217832_at		interleukin 12 receptor, beta 2		PPA1	pyrophosphatase (inorganic) 1
217832_at	1.47835	0.685591	PPA1	2.15632	NM_006372		217848_s_at		influenza virus NS1A binding protein		TNS3	tensin 3
219648_at	1.32672	0.615368	PTPLA	2.15598	NM_018000		217853_at		spermatogenesis and oogenesis specific basic helix-loop-helix 2		POLR2E	polymerase (RNA) II (DNA directed) polypeptide E, 25kDa
202158_s_at	2.19673	1.01916	CUGBP2	2.15544	NM_001025076 /// NM_001025077 /// NM_001083591 /// NM_006561		217854_s_at		PRP19/PSO4 pre-mRNA processing factor 19 homolog (S. cerevisiae)		RNF130	ring finger protein 130
207871_s_at	1.78745	0.829409	ST7	2.15509	NM_018412 /// NM_021908		217865_at		heterogeneous nuclear ribonucleoprotein H3 (2H9)		HSD17B12	hydroxysteroid (17-beta) dehydrogenase 12
203022_at	1.56556	0.726625	RNASEH2A	2.15456	NM_006397		217869_at		methylenetetrahydrofolate dehydrogenase (NADP+ dependent) 2, methenyltetrahydrofolate cyclohydrolase		NAT10	N-acetyltransferase 10
212627_s_at	1.38281	0.641967	EXOSC7	2.15402	NM_015004		217884_at		clock homolog (mouse)		CYBRD1	cytochrome b reductase 1
202364_at	1.35204	0.62773	MXI1	2.15386	NM_001008541 /// NM_005962 /// NM_130439		217889_s_at		discs, large homolog 1 (Drosophila)		DSG2	Desmoglein 2
218009_s_at	1.37046	0.636485	NUP85	2.15316	NM_003981 /// NM_199413 /// NM_199414		217901_at		centrosomal protein 170kDa		FAM49B	family with sequence similarity 49, member B
202614_at	1.17513	0.545783	SLC30A9	2.15311	NM_006345		217916_s_at		Notch homolog 2 (Drosophila) N-terminal like		PEF1	penta-EF-hand domain containing 1
212623_at	1.11367	0.517517	TMEM41B	2.15195	NM_015012		217923_at		dihydrofolate reductase		BTBD1	BTB (POZ) domain containing 1
212229_s_at	1.36011	0.632204	FBXO21	2.15138	NM_015002 /// NM_033624		217945_at		EPM2A (laforin) interacting protein 1		CMTM6	CKLF-like MARVEL transmembrane domain containing 6
221514_at	1.48978	0.692568	SMCR7L	2.1511	NM_006649		217947_at		nuclear autoantigenic sperm protein (histone-binding)		C16orf80	chromosome 16 open reading frame 80
212075_s_at	1.35856	0.631784	CSNK2A1	2.15035	NM_001895 /// NM_177559 /// NM_177560		217957_at		microtubule-associated protein 9		TOMM22	translocase of outer mitochondrial membrane 22 homolog (yeast)
210944_s_at	1.17434	0.546549	CAPN3	2.14864	NM_000070 /// NM_024344 /// NM_173087 /// NM_173088 /// NM_173089 /// NM_173090 /// NM_212464 /// NM_212465 /// NM_212467		217960_s_at		minichromosome maintenance complex component 5		DCXR	dicarbonyl/L-xylulose reductase
202797_at	1.42634	0.663888	SACM1L	2.14847	NM_014016		217973_at		SWAP-70 protein		SEPX1	selenoprotein X, 1
209434_s_at	1.82263	0.848428	PPAT	2.14825	NM_002703		217977_at		butyrophilin, subfamily 3, member A2		PHLDA1	pleckstrin homology-like domain, family A, member 1
221258_s_at	1.62199	0.755914	C15orf44	2.14573	NM_031217		218000_s_at		procollagen-lysine, 2-oxoglutarate 5-dioxygenase 2		PRC1	protein regulator of cytokinesis 1
201929_s_at	1.67294	0.780609	PKP4	2.14312	NM_001005476 /// NM_003628		218009_s_at		phorbol-12-myristate-13-acetate-induced protein 1		NUP85	nucleoporin 85kDa
210110_x_at	1.17987	0.550622	HNRNPH3	2.1428	NM_012207 /// NM_021644		218014_at		ubiquitin protein ligase E3A (human papilloma virus E6-associated protein, Angelman syndrome)		NUSAP1	nucleolar and spindle associated protein 1
209219_at	1.4178	0.662406	RDBP	2.14037	NM_002904		218039_at		nudix (nucleoside diphosphate linked moiety X)-type motif 1		MRPS16	mitochondrial ribosomal protein S16
201001_s_at	1.40547	0.657515	TMEM189-UBE2V1 /// UBE2V1	2.13755	NM_001032288 /// NM_003349 /// NM_021988 /// NM_022442 /// NM_199144 /// NM_199203		218046_s_at		homeobox B7		PRPF40A	PRP40 pre-mRNA processing factor 40 homolog A (S. cerevisiae)
221984_s_at	1.5444	0.722607	KIF18B	2.13726	NM_024293		218053_at		G protein-coupled receptor 177		WDR41	WD repeat domain 41
218105_s_at	1.48401	0.694355	MRPS34	2.13724	NM_015956 /// NM_146387 /// NM_146388		218055_s_at		melanoregulin		BFAR	bifunctional apoptosis regulator
203163_at	1.45218	0.679469	KATNB1	2.13722	NM_005886		218056_at		GINS complex subunit 1 (Psf1 homolog)		GGNBP2	gametogenetin binding protein 2
208716_s_at	1.34854	0.63124	TMCO1	2.13633	NM_019026		218079_s_at		polo-like kinase 4 (Drosophila)		UBP1	upstream binding protein 1 (LBP-1a)
203300_x_at	1.25183	0.586082	AP1S2	2.13594	NM_003916		218082_s_at		zinc finger protein 84		MRPL4	mitochondrial ribosomal protein L4
203608_at	1.29282	0.605638	ALDH5A1	2.13465	NM_001080 /// NM_170740		218105_s_at		PRP40 pre-mRNA processing factor 40 homolog A (S. cerevisiae)		MRPS34	mitochondrial ribosomal protein S34
212216_at	1.27089	0.595497	PREPL	2.13417	NM_001042385 /// NM_001042386 /// NM_006036		218112_at		GDP-mannose 4,6-dehydratase		RBM22	RNA binding motif protein 22
221688_s_at	1.53029	0.717132	C19orf62	2.1339	NM_018285		218134_s_at		ribosomal RNA processing 15 homolog (S. cerevisiae)		C14orf108	chromosome 14 open reading frame 108
200811_at	1.6896	0.793112	CIRBP	2.13034	NM_001280 /// NR_023312 /// NR_023313		218139_s_at		A kinase (PRKA) anchor protein 7		ZNF395	zinc finger protein 395
213009_s_at	1.25049	0.587268	TRIM37	2.12933	NM_001005207 /// NM_015294		218149_s_at		pogo transposable element with KRAB domain		MCTS1	malignant T cell amplified sequence 1
210250_x_at	1.45592	0.683844	ADSL	2.12902	NM_000026 /// NM_001123378		218163_at		phosphodiesterase 6D, cGMP-specific, rod, delta		LOC100130369 /// VAC14	Vac14 homolog (S. cerevisiae) /// hypothetical protein LOC100130369
203941_at	1.3734	0.645163	INTS9	2.12876	NM_018250		218169_at		KIAA0528		ARMC1	armadillo repeat containing 1
201637_s_at	1.3096	0.615199	FXR1	2.12875	NM_001013438 /// NM_001013439 /// NM_005087		218185_s_at		BUB3 budding uninhibited by benzimidazoles 3 homolog (yeast)		LMBRD1	LMBR1 domain containing 1
216591_s_at	1.31457	0.617666	FARSA	2.12829	NM_001035511 /// NM_001035512 /// NM_001035513 /// NM_001089593 /// NM_003001 /// XM_001717960 /// XM_001723532 /// XM_001725207		218191_s_at		UDP-N-acetyl-alpha-D-galactosamine:polypeptide N-acetylgalactosaminyltransferase 1 (GalNAc-T1)		SCPEP1	serine carboxypeptidase 1
201219_at	1.3426	0.631161	CTBP2	2.12719	NM_001083914 /// NM_001329 /// NM_022802		218217_at		tumor suppressor candidate 4		TNKS2	tankyrase, TRF1-interacting ankyrin-related ADP-ribose polymerase 2
203095_at	1.35359	0.636484	MTIF2	2.12666	NM_001005369 /// NM_002453		218228_s_at		peptidase (mitochondrial processing) beta		POGK	pogo transposable element with KRAB domain
209288_s_at	1.4377	0.676316	CDC42EP3	2.12578	NM_006449		218229_s_at		mitochondrial ribosomal protein L4		NOL8	nucleolar protein 8
215230_x_at	1.46335	0.688563	NKTR	2.12522	NM_001037808 /// NM_001099661 /// NM_003752		218244_at		ubiquitin specific peptidase 48		FAM111A	family with sequence similarity 111, member A
209056_s_at	1.54931	0.729139	CDC5L	2.12485	NM_001253		218248_at		caspase 6, apoptosis-related cysteine peptidase		KRCC1	lysine-rich coiled-coil 1
203214_x_at	1.34566	0.633429	CDC2	2.1244	NM_001786 /// NM_033379		218303_x_at		hypothetical protein FLJ11822		GALNT7	UDP-N-acetyl-alpha-D-galactosamine:polypeptide N-acetylgalactosaminyltransferase 7 (GalNAc-T7)
205369_x_at	1.3253	0.624246	DBT	2.12304	NM_001918		218313_s_at		solute carrier family 35 (CMP-sialic acid transporter), member A1		STYXL1	serine/threonine/tyrosine interacting-like 1
202130_at	1.19521	0.563062	RIOK3	2.12269	NM_003831		218321_x_at		polymerase (DNA directed), alpha 2 (70kD subunit)		PPCS	phosphopantothenoylcysteine synthetase
206414_s_at	1.45644	0.686143	DDEF2	2.12264	NM_003887		218341_at		protein phosphatase 1D magnesium-dependent, delta isoform		ZWILCH	Zwilch, kinetochore associated, homolog (Drosophila)
201647_s_at	1.31369	0.619106	SCARB2	2.12191	NM_005506		218349_s_at		glutaminyl-tRNA synthase (glutamine-hydrolyzing)-like 1		COMMD8	COMM domain containing 8
202089_s_at	1.21429	0.572357	SLC39A6	2.12156	NM_001099406 /// NM_012319		218351_at		high-mobility group box 2		TRAPPC2L	trafficking protein particle complex 2-like
212498_at	1.20548	0.568257	---	2.12135	---		218354_at		armadillo repeat containing 1		FTSJ2	FtsJ homolog 2 (E. coli)
215000_s_at	1.33722	0.630475	---	2.12098	NM_001042548 /// NM_005102		218356_at		DnaJ (Hsp40) homolog, subfamily C, member 6		CRELD2	cysteine-rich with EGF-like domains 2
211623_s_at	1.35631	0.639514	FBL	2.12084	NM_001436		218358_at		antigen p97 (melanoma associated) identified by monoclonal antibodies 133.2 and 96.5		GOLPH3L	golgi phosphoprotein 3-like
218465_at	1.19765	0.564801	TMEM14A	2.12049	NM_018126		218361_at		transcription elongation factor A (SII), 1		HEBP1	heme binding protein 1
211630_s_at	1.69786	0.801357	GSS	2.11873	NM_000178		218450_at		deoxyhypusine synthase		BXDC5	brix domain containing 5
201013_s_at	1.51124	0.71368	PAICS	2.11753	NM_001079524 /// NM_001079525 /// NM_006452		218462_at		aspartate beta-hydroxylase		TMEM33	transmembrane protein 33
209515_s_at	1.2811	0.605113	RAB27A	2.11713	NM_004580 /// NM_183234 /// NM_183235 /// NM_183236		218465_at		SEH1-like (S. cerevisiae)		TMEM14A	transmembrane protein 14A
213097_s_at	1.37031	0.647471	ZRF1	2.1164	NM_014377		218477_at		hyaluronan-mediated motility receptor (RHAMM)		SLC35A5	solute carrier family 35, member A5
214224_s_at	1.51664	0.716927	HIST2H2AA3 /// HIST2H2AA4	2.11547	NM_006223		218519_at		asparagine synthetase		CEP55	centrosomal protein 55kDa
215338_s_at	1.27234	0.602082	TRAF3IP2	2.11323	NM_005385		218542_at		pyruvate dehydrogenase (lipoamide) beta		MAFB	v-maf musculoaponeurotic fibrosarcoma oncogene homolog B (avian)
216392_s_at	1.35733	0.642373	SF3A1	2.113	NM_007190		218559_s_at		influenza virus NS1A binding protein		AGK	acylglycerol kinase
203588_s_at	1.36429	0.645715	TFDP2	2.11284	NM_006286		218568_at		intracisternal A particle-promoted polypeptide		LRRC40	leucine rich repeat containing 40
202294_at	1.2968	0.613974	STAG1	2.11215	NM_005862		218577_at		DEAH (Asp-Glu-Ala-His) box polypeptide 9		DTL	denticleless homolog (Drosophila)
209630_s_at	1.26631	0.599599	FBXW2	2.11193	NM_012164		218585_s_at		mRNA turnover 4 homolog (S. cerevisiae)		NUP37	nucleoporin 37kDa
201477_s_at	1.56283	0.740359	RRM1	2.11091	NM_001033		218622_at		cleavage and polyadenylation specific factor 6, 68kDa		EIF4ENIF1	eukaryotic translation initiation factor 4E nuclear import factor 1
217140_s_at	1.38562	0.65667	MT1F	2.11008	NM_003374 /// XR_038899		218626_at		deleted in lymphocytic leukemia, 2 /// deleted in lymphocytic leukemia 2-like		CCDC53	coiled-coil domain containing 53
210438_x_at	1.31361	0.622839	TROVE2	2.10907	NM_001042369 /// NM_001042370 /// NM_004600		218628_at		kinesin family member 1B		CRIPT	cysteine-rich PDZ-binding protein
218450_at	1.42685	0.676589	BXDC5	2.10889	NM_015987		218643_s_at		ring finger protein 141		SLC25A15	solute carrier family 25 (mitochondrial carrier; ornithine transporter) member 15
218901_at	1.42605	0.676762	ARID1A	2.10716	NM_020353		218653_at		proliferating cell nuclear antigen		MRPS33	mitochondrial ribosomal protein S33
206441_s_at	1.43059	0.679112	COMMD4	2.10655	NM_017828		218654_s_at		N-myc (and STAT) interactor		NCAPG	non-SMC condensin I complex, subunit G
204883_s_at	1.23959	0.58871	HUS1	2.10561	NM_004507		218663_at		CDC45 cell division cycle 45-like (S. cerevisiae)		MECR	mitochondrial trans-2-enoyl-CoA reductase
213720_s_at	1.64314	0.780401	XYLT1	2.1055	NM_003072		218664_at		alpha-methylacyl-CoA racemase /// C1q and tumor necrosis factor related protein 3		PCTP	phosphatidylcholine transfer protein
217865_at	1.46569	0.696214	HSD17B12	2.10523	NM_018434		218676_s_at		LMBR1 domain containing 1		EXOSC4	exosome component 4
212015_x_at	1.30021	0.617646	PTBP1	2.10511	NM_002819 /// NM_031990 /// NM_031991 /// NM_175847		218695_at		ribonucleotide reductase M1		LACTB2	lactamase, beta 2
221726_at	1.30467	0.619871	MPHOSPH8	2.10474	NM_000983		218701_at		BCL2/adenovirus E1B 19kDa interacting protein 3		UTP6	UTP6, small subunit (SSU) processome component, homolog (yeast)
207121_s_at	1.24039	0.589824	MAPK6	2.10297	NM_002748		218715_at		TRAF and TNF receptor associated protein		CENPM	centromere protein M
208951_at	1.41449	0.672962	ALDH7A1	2.10188	NM_001182		218741_at		PDZ and LIM domain 3		TAPBPL	TAP binding protein-like
218112_at	1.59123	0.757588	RBM22	2.10038	NM_023936		218747_s_at		solute carrier family 25 (mitochondrial carrier; ornithine transporter) member 15		MSRB2	methionine sulfoxide reductase B2
201181_at	1.19601	0.569537	GNAI3	2.09996	NM_006496		218773_s_at		centrin, EF-hand protein, 3 (CDC31 homolog, yeast)		ATAD2	ATPase family, AAA domain containing 2
218014_at	1.3998	0.666975	NUSAP1	2.09873	NM_024844		218782_s_at		tubulin folding cofactor B		PANK2	pantothenate kinase 2 (Hallervorden-Spatz syndrome)
204127_at	1.51176	0.720337	RFC3	2.09868	NM_002915 /// NM_181558		218809_at		programmed cell death 4 (neoplastic transformation inhibitor)		ARRB1	arrestin, beta 1
205542_at	1.48669	0.708412	STEAP1	2.09862	NM_012449		218832_x_at		CUG triplet repeat, RNA binding protein 2		TNFRSF21	tumor necrosis factor receptor superfamily, member 21
202864_s_at	1.1756	0.560366	SP100	2.09792	NM_001080391 /// NM_003113		218856_at		polymerase (RNA) II (DNA directed) polypeptide E, 25kDa		DEPDC6	DEP domain containing 6
212643_at	1.27758	0.609024	MAPK1IP1L	2.09775	NM_144578		218858_at		ZW10 interactor		FBXO5	F-box protein 5
210296_s_at	1.19652	0.570484	PXMP3	2.09737	NM_000318 /// NM_001079867		218875_s_at		RAD23 homolog A (S. cerevisiae)		MLF1IP	MLF1 interacting protein
211932_at	1.2914	0.615894	HNRNPA3	2.0968	NM_194247		218883_s_at		chromosome 6 open reading frame 130		GALNT12	UDP-N-acetyl-alpha-D-galactosamine:polypeptide N-acetylgalactosaminyltransferase 12 (GalNAc-T12)
219215_s_at	1.46372	0.698163	CEP63	2.09653	NM_017767 /// NM_130849		218885_s_at		kinesin family member 18A		NETO2	neuropilin (NRP) and tolloid (TLL)-like 2
211016_x_at	1.24207	0.592612	HSPA4	2.09592	NM_002154		218888_s_at		Sjogren syndrome/scleroderma autoantigen 1		MRPL35	mitochondrial ribosomal protein L35
217869_at	1.27677	0.609234	NAT10	2.0957	NM_016142		218890_x_at		centrosomal protein 76kDa		PLSCR4	phospholipid scramblase 4
210655_s_at	1.25832	0.600453	FOXO3	2.09561	NM_001455 /// NM_201559		218901_at		proteasome (prosome, macropain) subunit, beta type, 8 (large multifunctional peptidase 7)		ARID1A	AT rich interactive domain 1A (SWI-like)
219203_at	1.49332	0.712732	IFIH1	2.09521	NM_016049		218917_s_at		aurora kinase A		TMEM106B	transmembrane protein 106B
218163_at	1.32209	0.631138	LOC100130369 /// VAC14	2.09476	NM_014060 /// XM_001715103		218930_s_at		URB1 ribosome biogenesis 1 homolog (S. cerevisiae)		QRSL1	glutaminyl-tRNA synthase (glutamine-hydrolyzing)-like 1
210212_x_at	1.56116	0.745486	LOC100133946 /// MTCP1	2.09415	NM_001018024 /// NM_001018025 /// NM_014221 /// XM_001719446		218949_s_at		aldehyde dehydrogenase 7 family, member A1		PAAF1	proteasomal ATPase-associated factor 1
212506_at	1.29632	0.619251	PICALM	2.09337	NM_001008660 /// NM_007166		218957_s_at		dual-specificity tyrosine-(Y)-phosphorylation regulated kinase 1A		RMI1	RMI1, RecQ mediated genome instability 1, homolog (S. cerevisiae)
213479_at	1.59452	0.761776	PPWD1	2.09316	NM_002523		218979_at		synovial sarcoma, X breakpoint 2 interacting protein		SLC35E3	solute carrier family 35, member E3
215203_at	1.18038	0.563991	EIF3C /// EIF3CL	2.0929	NM_002078		218988_at		centrosomal protein 68kDa		DSCC1	defective in sister chromatid cohesion 1 homolog (S. cerevisiae)
219037_at	1.35985	0.649775	CSGALNACT1	2.09279	NM_016052		219000_s_at		ATM interactor		RRP15	ribosomal RNA processing 15 homolog (S. cerevisiae)
209520_s_at	1.4227	0.680104	NCBP1	2.09189	NM_002486		219037_at		lipoprotein lipase		CSGALNACT1	chondroitin sulfate N-acetylgalactosaminyltransferase 1
219654_at	1.35415	0.64752	PTCD2	2.09129	NM_014241		219049_at		discoidin domain receptor tyrosine kinase 2		C8orf32	chromosome 8 open reading frame 32
219271_at	1.45811	0.697323	OGDHL	2.09101	NM_024572		219060_at		mannosyl (alpha-1,6-)-glycoprotein beta-1,2-N-acetylglucosaminyltransferase		NSMCE4A	non-SMC element 4 homolog A (S. cerevisiae)
212955_s_at	1.57604	0.753799	POLR2I	2.0908	NM_006233		219067_s_at		hairy/enhancer-of-split related with YRPW motif 2		RNF141	ring finger protein 141
201415_at	1.76522	0.844647	GSS	2.08989	NM_000178		219104_at		minichromosome maintenance complex component 10		RBM35A	RNA binding motif protein 35A
216241_s_at	1.49459	0.715714	NR3C1	2.08826	NM_006756 /// NM_201437		219121_s_at		B9 protein domain 1		PELI2	pellino homolog 2 (Drosophila)
204839_at	1.35773	0.650559	POP5	2.08703	NM_015918 /// NM_198202		219132_at		cell adhesion molecule 1		PBK	PDZ binding kinase
213129_s_at	1.47961	0.709411	GCSH /// LOC730107	2.08569	NM_004483 /// XM_001134369 /// XM_001721064		219148_at		CD2 (cytoplasmic tail) binding protein 2		C14orf122	chromosome 14 open reading frame 122
215629_s_at	1.44751	0.694072	C1orf41	2.08554	NR_002612 /// NR_002771		219203_at		stimulated by retinoic acid 13 homolog (mouse)		IFIH1	interferon induced with helicase C domain 1
217960_s_at	1.49747	0.718346	DCXR	2.08461	NM_020243		219209_at		centrosomal protein 68kDa		USP18	ubiquitin specific peptidase 18
208358_s_at	1.32934	0.637735	UGT8	2.08448	NM_003360		219211_at		iroquois homeobox 5		SLC39A4	solute carrier family 39 (zinc transporter), member 4
203318_s_at	1.30986	0.628398	ZNF148	2.08444	NM_021964		219215_s_at		phosphoglycerate dehydrogenase		CEP63	centrosomal protein 63kDa
214431_at	1.60372	0.769606	BIN1	2.08382	NM_003875		219242_at		phosphoribosyl pyrophosphate synthetase-associated protein 2		GALNT14	UDP-N-acetyl-alpha-D-galactosamine:polypeptide N-acetylgalactosaminyltransferase 14 (GalNAc-T14)
218229_s_at	1.27328	0.611364	NOL8	2.0827	NM_017542		219271_at		interleukin 1 receptor accessory protein		OGDHL	oxoglutarate dehydrogenase-like
218888_s_at	1.25765	0.604015	MRPL35	2.08215	NM_018092		219277_s_at		nucleosome assembly protein 1-like 1		RBM15	RNA binding motif protein 15
219588_s_at	1.49314	0.717293	THAP10	2.08163	NM_017760		219286_s_at		chromosome 12 open reading frame 29		KIF15	kinesin family member 15
209065_at	1.31801	0.633262	UQCRB	2.0813	NM_006294		219306_at		golgi apparatus protein 1		CEP76	centrosomal protein 76kDa
220690_s_at	1.30468	0.626965	IFT122	2.08095	NM_015510		219311_at		vascular endothelial zinc finger 1		MPP5	membrane protein, palmitoylated 5 (MAGUK p55 subfamily member 5)
208643_s_at	1.40904	0.677245	XRCC5	2.08055	NM_021141		219321_at		chromobox homolog 5 (HP1 alpha homolog, Drosophila)		CHMP5	chromatin modifying protein 5
201582_at	1.26419	0.608134	SEC23B	2.07881	NM_006363 /// NM_032985 /// NM_032986		219356_s_at		pygopus homolog 1 (Drosophila)		IFT81	intraflagellar transport 81 homolog (Chlamydomonas)
209620_s_at	1.36091	0.655097	ABCB7	2.07742	NM_004299		219372_at		eukaryotic translation initiation factor 2-alpha kinase 1		DERL1	Der1-like domain family, member 1
210534_s_at	1.56085	0.751364	B9D1	2.07735	NM_015681		219402_s_at		TP53 activated protein 1		RAB38	RAB38, member RAS oncogene family
202347_s_at	1.29871	0.62522	UBE2K	2.07721	NM_001111112 /// NM_001111113 /// NM_005339		219412_at		WEE1 homolog (S. pombe)		PSMD10	proteasome (prosome, macropain) 26S subunit, non-ATPase, 10
202370_s_at	1.28373	0.618091	CBFB	2.07692	NM_001755 /// NM_022845		219485_s_at		RMI1, RecQ mediated genome instability 1, homolog (S. cerevisiae)		NXN	nucleoredoxin
219522_at	1.66976	0.803976	SLC47A1	2.07688	NM_014344		219489_s_at		gem (nuclear organelle) associated protein 6		SHCBP1	SHC SH2-domain binding protein 1
218000_s_at	1.10128	0.53088	PRC1	2.07445	NM_007350		219493_at		brain and reproductive organ-expressed (TNFRSF1A modulator)		RAD54B	RAD54 homolog B (S. cerevisiae)
204240_s_at	1.4663	0.706844	SMC2	2.07443	NM_001042550 /// NM_001042551 /// NM_006444		219494_at		LSM5 homolog, U6 small nuclear RNA associated (S. cerevisiae)		DSN1	DSN1, MIND kinetochore complex component, homolog (S. cerevisiae)
211043_s_at	1.48036	0.713845	CLTB	2.07378	NM_001834 /// NM_007097		219512_at		insulin induced gene 2		FJX1	four jointed box 1 (Drosophila)
213399_x_at	1.37819	0.664757	RPN2	2.07323	NM_002951		219522_at		zinc finger protein 93		SLC47A1	solute carrier family 47, member 1
212281_s_at	1.49777	0.722824	TMEM97	2.07211	NM_014573		219525_at		Transcribed locus, weakly similar to NP_060312.1 hypothetical protein LOC55652 [Homo sapiens]		GEMIN6	gem (nuclear organelle) associated protein 6
210131_x_at	1.37768	0.66496	SDHC	2.07183	NM_001035511 /// NM_001035512 /// NM_001035513 /// NM_003001		219539_at		topoisomerase (DNA) II alpha 170kDa		NME7	non-metastatic cells 7, protein expressed in (nucleoside-diphosphate kinase)
206173_x_at	1.34591	0.649898	GABPB2	2.07095	NM_002041 /// NM_005254 /// NM_016654 /// NM_016655 /// NM_181427		219553_at		ribonucleotide reductase M2 polypeptide		CENPN	centromere protein N
209565_at	1.32688	0.641158	RNF113A	2.06951	NM_006978		219555_s_at		glutamyl-prolyl-tRNA synthetase		CYP20A1	cytochrome P450, family 20, subfamily A, polypeptide 1
209503_s_at	1.28606	0.621499	PSMC5	2.06928	NM_002805		219565_at		TAP binding protein-like		NCAPG2	non-SMC condensin II complex, subunit G2
212299_at	1.22396	0.591797	NEK9	2.06821	NM_033116		219588_s_at		v-maf musculoaponeurotic fibrosarcoma oncogene homolog B (avian)		THAP10	THAP domain containing 10
200037_s_at	1.46233	0.707097	CBX3 /// LOC653972	2.06808	NM_007276 /// NM_016587 /// XM_938779		219596_at		coilin		MREG	melanoregulin
204653_at	1.45345	0.703249	TFAP2A	2.06677	NM_001032280 /// NM_001042425 /// NM_003220		219648_at		fragile X mental retardation, autosomal homolog 1		PTPLA	protein tyrosine phosphatase-like (proline instead of catalytic arginine), member A
208024_s_at	1.5686	0.759373	DGCR6 /// DGCR6L	2.06565	NM_005675 /// NM_033257		219654_at		palladin, cytoskeletal associated protein		PTCD2	pentatricopeptide repeat domain 2
212714_at	1.20034	0.581452	LARP4	2.06438	NM_052879 /// NM_199188 /// NM_199190		219658_at		homeobox B7		STK32B	serine/threonine kinase 32B
203087_s_at	1.33871	0.648507	KIF2A	2.0643	NM_001098511 /// NM_004520		219686_at		COMM domain containing 8		MNS1	meiosis-specific nuclear structural 1
213995_at	1.54819	0.75029	DDX17	2.06345	NM_001003803 /// NM_001003805 /// NM_015684		219703_at		chromosome 8 open reading frame 32		HEY2	hairy/enhancer-of-split related with YRPW motif 2
219553_at	1.39754	0.677371	CENPN	2.06318	NM_013330 /// NM_197972		219743_at		methylmalonyl Coenzyme A mutase		IPP	intracisternal A particle-promoted polypeptide
221245_s_at	1.36491	0.661618	WBP1 /// ZNHIT4	2.06299	NM_003468		219843_at		solute carrier family 7, (cationic amino acid transporter, y+ system) member 11		---	---
205860_x_at	1.08891	0.527872	FOLH1	2.06283	NM_001014986 /// NM_004476		219880_at		neuropilin (NRP) and tolloid (TLL)-like 2		LOC100134295 /// SLCO4A1	solute carrier organic anion transporter family, member 4A1 /// similar to Solute carrier organic anion transporter family, member 4A1
202113_s_at	1.20981	0.58706	SNX2	2.06079	NM_003100		219911_s_at		receptor accessory protein 1		ASPM	asp (abnormal spindle) homolog, microcephaly associated (Drosophila)
202641_at	1.23318	0.598499	ARL3	2.06045	NM_004311		219918_s_at		PC4 and SFRS1 interacting protein 1		UCHL5	ubiquitin carboxyl-terminal hydrolase L5
201302_at	1.27129	0.617666	ANXA4	2.05822	NM_001153		219960_s_at		CKLF-like MARVEL transmembrane domain containing 6		C20orf19	chromosome 20 open reading frame 19
218654_s_at	1.38556	0.67331	NCAPG	2.05783	NM_016071 /// NM_053035		219961_s_at		chromosome 12 open reading frame 52		C1orf164	chromosome 1 open reading frame 164
220890_s_at	1.32239	0.642796	PSAT1	2.05724	NM_016355 /// NM_201224		219988_s_at		ring finger protein 13		C8orf44 /// SGK3	serum/glucocorticoid regulated kinase family, member 3 /// chromosome 8 open reading frame 44
216194_s_at	1.76998	0.860808	MAP3K4	2.05619	NM_001281		220038_at		estrogen receptor binding site associated, antigen, 9		MFI2	antigen p97 (melanoma associated) identified by monoclonal antibodies 133.2 and 96.5
202626_s_at	1.1621	0.565192	LYN	2.05612	NM_001111097 /// NM_002350		220043_s_at		glutaredoxin 5		USP48	ubiquitin specific peptidase 48
202697_at	1.35909	0.661073	NUDT21	2.05588	NM_007006		220079_s_at		COX15 homolog, cytochrome c oxidase assembly protein (yeast)		ANTXR1	anthrax toxin receptor 1
213998_s_at	1.43235	0.697148	GSN	2.05459	NM_001098504 /// NM_001098505 /// NM_006386 /// NM_030881		220092_s_at		CDC5 cell division cycle 5-like (S. pombe)		SOHLH2	spermatogenesis and oogenesis specific basic helix-loop-helix 2
200005_at	1.38775	0.675536	EIF3D	2.0543	NM_003753		220129_at		G protein-coupled receptor 37 (endothelin receptor type B-like)		MAP9	microtubule-associated protein 9
202642_s_at	1.31807	0.641654	TRRAP	2.05418	NM_003496		220145_at		Wolf-Hirschhorn syndrome candidate 2		CYB5R2	cytochrome b5 reductase 2
209272_at	1.26166	0.614286	NAB1	2.05386	NM_005966		220230_s_at		sarcoglycan, delta (35kDa dystrophin-associated glycoprotein)		KLHL7	kelch-like 7 (Drosophila)
200816_s_at	1.34904	0.656897	PAFAH1B1	2.05365	NM_000430		220239_at		family with sequence similarity 111, member A		JMJD2D	jumonji domain containing 2D
220840_s_at	1.25592	0.611591	DDX47	2.05354	NM_018186		220278_at		penta-EF-hand domain containing 1		SPATA6	spermatogenesis associated 6
218664_at	1.47121	0.716672	PCTP	2.05284	NM_001024732 /// NM_016011		220298_s_at		chromosome 1 open reading frame 164		N6AMT1	N-6 adenine-specific DNA methyltransferase 1 (putative)
201569_s_at	1.28279	0.624929	LOC100131861 /// SAMM50	2.0527	NM_015380 /// XM_001716418 /// XM_001724537 /// XM_001725780		220311_at		deoxyuridine triphosphatase		MYLIP	myosin regulatory light chain interacting protein
213016_at	1.27228	0.619917	---	2.05235	---		220319_s_at		synaptotagmin XVII		ROPN1 /// ROPN1B	ropporin, rhophilin associated protein 1 /// ropporin, rhophilin associated protein 1B
221676_s_at	1.31434	0.640507	IMP3	2.05203	NM_014325		220425_x_at		SWI/SNF related, matrix associated, actin dependent regulator of chromatin, subfamily a, member 2		---	---
203979_at	1.4628	0.712859	CYP27A1	2.05202	NM_000784		220494_s_at		ubiquitin specific peptidase 14 (tRNA-guanine transglycosylase)		GBL	G protein beta subunit-like
218134_s_at	1.24075	0.604762	C14orf108	2.05164	NM_018047		220587_s_at		brain and reproductive organ-expressed (TNFRSF1A modulator)		OSGEPL1	O-sialoglycoprotein endopeptidase-like 1
201306_s_at	1.5164	0.739315	ANP32B	2.05109	NM_006401		220631_at		RAB11 family interacting protein 2 (class I)		HP1BP3	heterochromatin protein 1, binding protein 3
212402_at	1.31997	0.643694	ZC3H13	2.05061	NM_015070		220633_s_at		CD3e molecule, epsilon associated protein		MCM10	minichromosome maintenance complex component 10
209902_at	1.39185	0.678968	ATR	2.04994	NM_001184		220651_s_at		PDZ and LIM domain 5		MRTO4	mRNA turnover 4 homolog (S. cerevisiae)
203048_s_at	1.22061	0.595538	KIAA0372	2.04959	NM_014639		220688_s_at		eyes absent homolog 1 (Drosophila)		DHRS7B	dehydrogenase/reductase (SDR family) member 7B
210788_s_at	1.31984	0.644299	DHRS7	2.04848	NM_016029		220690_s_at		defective in sister chromatid cohesion 1 homolog (S. cerevisiae)		IFT122	intraflagellar transport 122 homolog (Chlamydomonas)
219489_s_at	1.35205	0.660098	SHCBP1	2.04826	NM_022463		220744_s_at		cell division cycle 37 homolog (S. cerevisiae)		C1orf112	chromosome 1 open reading frame 112
217457_s_at	1.30219	0.635948	NFATC2IP	2.04763	NM_001100426 /// NM_001100427 /// NM_001100428 /// NM_001100429 /// NM_001100430 /// NM_021159		220840_s_at		coxsackie virus and adenovirus receptor		DDX47	DEAD (Asp-Glu-Ala-Asp) box polypeptide 47
220230_s_at	2.04026	0.996714	KLHL7	2.04698	NM_016229		220890_s_at		ATPase, Na+/K+ transporting, beta 1 polypeptide		PSAT1	phosphoserine aminotransferase 1
222275_at	1.42589	0.696613	PARVB	2.04689	---		220892_s_at		UDP-N-acetyl-alpha-D-galactosamine:polypeptide N-acetylgalactosaminyltransferase 14 (GalNAc-T14)		C1orf25	chromosome 1 open reading frame 25
218890_x_at	1.47453	0.720688	PLSCR4	2.04601	NM_016622 /// NM_145644		220992_s_at		tuberous sclerosis 2		STXBP6	syntaxin binding protein 6 (amisyn)
216457_s_at	1.12049	0.547675	IGF2BP3 /// LOC645468	2.0459	NM_001005409 /// NM_005877		220994_s_at		Bardet-Biedl syndrome 4		DDEF1	development and differentiation enhancing factor 1
202246_s_at	1.40777	0.688234	CDK4	2.04548	NM_000075		221039_s_at		MLF1 interacting protein		PECR	peroxisomal trans-2-enoyl-CoA reductase
206117_at	1.31773	0.644459	TPM1	2.04471	NM_000366 /// NM_001018004 /// NM_001018005 /// NM_001018006 /// NM_001018007 /// NM_001018008 /// NM_001018020		221142_s_at		RAD51 associated protein 1		ZCCHC10	zinc finger, CCHC domain containing 10
201581_at	1.33434	0.652599	TXNDC13	2.04466	NM_021156		221193_s_at		kelch-like 23 (Drosophila)		RIPK4	receptor-interacting serine-threonine kinase 4
219321_at	1.16025	0.567783	CHMP5	2.04348	NM_022474		221215_s_at		H2A histone family, member Y		FZD5	frizzled homolog 5 (Drosophila)
212107_s_at	1.30264	0.637612	DHX9	2.043	NM_001357		221245_s_at		heparan sulfate 2-O-sulfotransferase 1		WBP1 /// ZNHIT4	WW domain binding protein 1 /// zinc finger, HIT type 4
201827_at	1.58561	0.776435	SMARCD2	2.04217	NM_001098426 /// NM_003077		221251_x_at		integrin alpha FG-GAP repeat containing 1		KIF18A	kinesin family member 18A
209862_s_at	1.34671	0.659685	CEP57	2.04144	NM_014679		221258_s_at		adducin 3 (gamma)		C15orf44	chromosome 15 open reading frame 44
209780_at	1.42996	0.700661	PHTF2	2.04087	NM_020432		221265_s_at		pleckstrin homology-like domain, family A, member 1		QTRT1	queuine tRNA-ribosyltransferase 1 (tRNA-guanine transglycosylase)
218191_s_at	1.23928	0.607382	SCPEP1	2.04037	NM_018368		221270_s_at		cullin 5		ITFG1	integrin alpha FG-GAP repeat containing 1
211115_x_at	1.443	0.707339	SIP1	2.04004	NM_001009182 /// NM_001009183 /// NM_003616		221449_s_at		G-protein signaling modulator 2 (AGS3-like, C. elegans)		ENSA	endosulfine alpha
218626_at	1.40517	0.688803	CCDC53	2.04001	NM_019843		221487_s_at		adducin 3 (gamma)		KPNA3	karyopherin alpha 3 (importin alpha 4)
207830_s_at	1.17989	0.578557	PPP1R8	2.03936	NM_002713 /// NM_014110 /// NM_138558		221502_at		interleukin 1 receptor accessory protein		UTP14A	UTP14, U3 small nucleolar ribonucleoprotein, homolog A (yeast)
203348_s_at	1.41477	0.693925	ETV5	2.0388	NM_004454		221514_at		DEAD (Asp-Glu-Ala-Asp) box polypeptide 23		SMCR7L	Smith-Magenis syndrome chromosome region, candidate 7-like
200969_at	1.2435	0.609962	SERP1	2.03866	NM_014445		221516_s_at		BCL2-associated X protein		GINS2	GINS complex subunit 2 (Psf2 homolog)
203607_at	1.08284	0.531232	INPP5F	2.03836	NM_014937 /// NR_003251 /// NR_003252		221521_s_at		ribosomal protein S6 kinase, 90kDa, polypeptide 5		RRAGD	Ras-related GTP binding D
218354_at	1.52419	0.747826	FTSJ2	2.03816	NM_016209		221524_s_at		myotubularin related protein 2		COX15	COX15 homolog, cytochrome c oxidase assembly protein (yeast)
208678_at	1.1729	0.575749	ATP6V1E1	2.03717	NM_001039366 /// NM_001039367 /// NM_001696		221550_at		phosphodiesterase 4B, cAMP-specific (phosphodiesterase E4 dunce homolog, Drosophila)		LEF1	lymphoid enhancer-binding factor 1
203213_at	1.82484	0.895817	CDC2	2.03707	NM_001786 /// NM_033379		221558_s_at		exosome component 2		NOL3	nucleolar protein 3 (apoptosis repressor with CARD domain)
216199_s_at	1.30914	0.642885	WDHD1	2.03634	NM_005922 /// NM_006724		221566_s_at		glycoprotein M6B		KCNMA1	potassium large conductance calcium-activated channel, subfamily M, alpha member 1
202268_s_at	1.28326	0.630185	NAE1	2.03632	NM_001018159 /// NM_001018160 /// NM_003905		221583_s_at		ATP synthase, H+ transporting, mitochondrial F0 complex, subunit s (factor B)		KCNMA1	potassium large conductance calcium-activated channel, subfamily M, alpha member 1
212328_at	1.2897	0.634251	LIMCH1	2.03342	NM_001112717 /// NM_001112718 /// NM_001112719 /// NM_001112720 /// NM_014988		221584_s_at		RAD54 homolog B (S. cerevisiae)		ALDH6A1	aldehyde dehydrogenase 6 family, member A1
201614_s_at	1.46629	0.721108	RUVBL1	2.03338	NM_003707		221588_x_at		proteasome (prosome, macropain) 26S subunit, ATPase, 2		LOC728198 /// TAF9B	TAF9B RNA polymerase II, TATA box binding protein (TBP)-associated factor, 31kDa /// similar to transcription associated factor TAFII31L
213007_at	1.43771	0.707555	FANCI	2.03194	NM_001113378 /// NM_018193		221589_s_at		PC4 and SFRS1 interacting protein 1		ACOT9	acyl-CoA thioesterase 9
221449_s_at	1.28933	0.634827	ENSA	2.03099	NM_030790		221618_s_at		zinc finger, CCHC domain containing 10		ZDHHC11	zinc finger, DHHC-type containing 11
202609_at	1.30881	0.644864	EPS8	2.0296	NM_004447		221641_s_at		ephrin-B3		CORO1C	coronin, actin binding protein, 1C
219132_at	1.23628	0.609328	PBK	2.02892	NM_021255		221646_s_at		cell division cycle 25 homolog A (S. pombe)		CCDC99	coiled-coil domain containing 99
212919_at	1.26409	0.623292	DCP2	2.02808	NM_152624		221676_s_at		PET112-like (yeast)		IMP3	IMP3, U3 small nucleolar ribonucleoprotein, homolog (yeast)
218622_at	1.29174	0.637251	EIF4ENIF1	2.02705	NM_024057		221685_s_at		glycoprotein M6B		DDX50	DEAD (Asp-Glu-Ala-Asp) box polypeptide 50
211609_x_at	1.35582	0.668865	PSMD4	2.02704	NM_002810		221688_s_at		tumor necrosis factor receptor superfamily, member 21		C19orf62	chromosome 19 open reading frame 62
201578_at	1.91509	0.945415	PODXL	2.02566	NM_001018111 /// NM_005397		221699_s_at		PBX/knotted 1 homeobox 1		RPL22	ribosomal protein L22
210434_x_at	1.34655	0.665751	JTB	2.02261	NM_006694		221711_s_at		telomerase reverse transcriptase		SUB1	SUB1 homolog (S. cerevisiae)
202178_at	1.47869	0.73129	PRKCZ	2.02202	NM_001033581 /// NM_001033582 /// NM_002744		221726_at		U2-associated SR140 protein		MPHOSPH8	M-phase phosphoprotein 8
56256_at	1.2176	0.602189	HK2	2.02196	NM_001040455		221727_at		transducin-like enhancer of split 1 (E(sp1) homolog, Drosophila)		C12orf52	chromosome 12 open reading frame 52
215982_s_at	1.38684	0.685978	FYN	2.0217	NM_005510		221771_s_at		potassium large conductance calcium-activated channel, subfamily M, alpha member 1		FAM45A /// FAM45B	family with sequence similarity 45, member B /// family with sequence similarity 45, member A
206746_at	1.48858	0.73661	BFSP1	2.02086	NM_001195		221777_at		spermatogenesis associated 6		KLHL22	kelch-like 22 (Drosophila)
213465_s_at	1.40993	0.69801	PPP1R7	2.01992	NM_002712		221804_s_at		ubiquitin-like 3		N4BP1	NEDD4 binding protein 1
209444_at	1.2259	0.606956	RAP1GDS1	2.01975	NM_001100426 /// NM_001100427 /// NM_001100428 /// NM_001100429 /// NM_001100430 /// NM_021159		221837_at		BRCA1 associated RING domain 1		HIGD1A	HIG1 domain family, member 1A
212749_s_at	1.15658	0.573217	RCHY1	2.0177	NM_001008925 /// NM_001009922 /// NM_015436		221867_at		transcription factor AP-2 beta (activating enhancer binding protein 2 beta)		SEH1L	SEH1-like (S. cerevisiae)
210147_at	1.51412	0.750465	ART3	2.01757	NM_001179		221896_s_at		glutaminyl-peptide cyclotransferase (glutaminyl cyclase)		GLRX5	glutaredoxin 5
217777_s_at	1.26441	0.627406	PRMT5	2.01529	NM_016395		221931_s_at		X-ray repair complementing defective repair in Chinese hamster cells 4		RPUSD2	RNA pseudouridylate synthase domain containing 2
219060_at	1.34468	0.667321	NSMCE4A	2.01504	NM_018024		221932_s_at		Zic family member 1 (odd-paired homolog, Drosophila)		GPR177	G protein-coupled receptor 177
221521_s_at	1.48758	0.738269	RRAGD	2.01495	NM_016095		221940_at		myosin VI		WDR59	WD repeat domain 59
40472_at	1.59622	0.792302	C19orf2	2.01466	NM_153613		221958_s_at		arginyl-tRNA synthetase		FAM134A	family with sequence similarity 134, member A
204326_x_at	1.62553	0.807094	MT1X	2.01405	NM_005952		221981_s_at		breast cancer 2, early onset		VRK3	vaccinia related kinase 3
214061_at	1.38271	0.686847	LOC100132532	2.01313	NM_145647		221984_s_at		4-aminobutyrate aminotransferase		KIF18B	kinesin family member 18B
202429_s_at	1.23324	0.612721	PPP3CA	2.01273	NM_000944		221998_s_at		vaccinia related kinase 3		RACGAP1	Rac GTPase activating protein 1
217286_s_at	1.36143	0.676573	PGK1	2.01224	NM_022477 /// NM_032013		222039_at		ring finger protein 41		ATF1	activating transcription factor 1
209025_s_at	1.486	0.738698	SYNCRIP	2.01165	NM_006372		222077_s_at		membrane protein, palmitoylated 5 (MAGUK p55 subfamily member 5)		NT5C1B /// RDH14	retinol dehydrogenase 14 (all-trans/9-cis/11-cis) /// 5'-nucleotidase, cytosolic IB
200684_s_at	1.30819	0.650489	UBE2L3	2.01109	NM_003347 /// NM_198157		222103_at		kelch-like 22 (Drosophila)		INTS7	integrator complex subunit 7
201674_s_at	1.46805	0.730268	AKAP1	2.01028	NM_003488		222203_s_at		methionine sulfoxide reductase B2		KRIT1	KRIT1, ankyrin repeat containing
203053_at	1.22342	0.608861	BCAS2	2.00935	NM_005872		222250_s_at		DAZ interacting protein 3, zinc finger		WHSC2	Wolf-Hirschhorn syndrome candidate 2
205527_s_at	1.39213	0.69286	GEMIN4	2.00925	NM_015721		222266_at		solute carrier family 39 (zinc transporter), member 4		ASMTL	acetylserotonin O-methyltransferase-like
205273_s_at	1.43043	0.712048	PITRM1	2.00889	NM_014889		222275_at		Bernardinelli-Seip congenital lipodystrophy 2 (seipin) /// heterogeneous nuclear ribonucleoprotein U-like 2		PARVB	parvin, beta
221265_s_at	1.29582	0.645501	QTRT1	2.00746	NM_030800		222288_at		HLA complex group 4		AGPAT7	1-acylglycerol-3-phosphate O-acyltransferase 7 (lysophosphatidic acid acyltransferase, eta)
202214_s_at	1.22126	0.608443	CUL4B	2.00719	NM_001079872 /// NM_003588		222305_at		calmodulin binding transcription activator 1		HEY1	hairy/enhancer-of-split related with YRPW motif 1
212428_at	1.32508	0.660243	KIAA0368	2.00696	NM_001080398		34031_i_at		zinc finger and BTB domain containing 43		DHFR	dihydrofolate reductase
212761_at	1.37843	0.687853	TCF7L2	2.00396	NM_030756		34225_at		serine/threonine kinase 32B		SIDT2	SID1 transmembrane family, member 2
203098_at	1.31934	0.658508	CDYL	2.00353	NM_004824 /// NM_170751 /// NM_170752		36554_at		DAZ associated protein 2		---	Transcribed locus
208879_x_at	1.21621	0.607229	PRPF6	2.00289	NM_012469		37966_at		cytochrome b5 reductase 2		ALDH6A1	aldehyde dehydrogenase 6 family, member A1
217771_at	1.47148	0.7351	MTCH2	2.00174	NM_016548 /// NM_177937		40472_at		HIG1 domain family, member 1A		C19orf2	Chromosome 19 open reading frame 2
209296_at	1.20474	0.602081	PPM1B	2.00097	NM_001033556 /// NM_001033557 /// NM_002706 /// NM_177968 /// NM_177969		44783_s_at		zinc finger protein 443		---	MRNA; cDNA DKFZp686K0394 (from clone DKFZp686K0394)
204639_at	1.35308	0.676516	ADA	2.00007	NM_000022		48808_at		TAF12 RNA polymerase II, TATA box binding protein (TBP)-associated factor, 20kDa		---	Transcribed locus, weakly similar to NP_060312.1 hypothetical protein LOC55652 [Homo sapiens]
206550_s_at	1.403	0.701478	NUP155	2.00006	NM_004298 /// NM_153485		56256_at		origin recognition complex, subunit 4-like (yeast)		HK2	hexokinase 2
Systematic	Normalized	Normalized			RefSeq Transcript ID		Probe Set ID

## Sheet: combo up 2
Treatment ()*	DMSO	Combo	Gene Symbol	fold change						Gene Title		Gene Symbol	Gene Title
AFFX-r2-Hs18SrRNA-5_at	0.0119102	4.80534	---	403.463	---		1494_f_at			cytochrome P450, family 2, subfamily A, polypeptide 6		CYP2A6	cytochrome P450, family 2, subfamily A, polypeptide 6
AFFX-HUMRGE/M10098_5_at	0.012319	4.90602	---	398.247	---		200630_x_at			SET nuclear oncogene		SET	SET nuclear oncogene
AFFX-HUMRGE/M10098_M_at	0.0194984	2.84694	---	146.009	---		200808_s_at			zyxin		ZYX	zyxin
204468_s_at	0.0504826	6.13297	TIE1	121.487	NM_005424		201147_s_at			TIMP metallopeptidase inhibitor 3 (Sorsby fundus dystrophy, pseudoinflammatory)		TIMP3	TIMP metallopeptidase inhibitor 3 (Sorsby fundus dystrophy, pseudoinflammatory)
AFFX-r2-Hs28SrRNA-3_at	0.0309506	3.38412	---	109.34	---		201261_x_at			biglycan		BGN	biglycan
204268_at	0.241923	16.711	S100A2	69.0756	NM_005978		201404_x_at			proteasome (prosome, macropain) subunit, beta type, 2		PSMB2	proteasome (prosome, macropain) subunit, beta type, 2
AFFX-r2-Hs18SrRNA-M_x_at	0.0787487	3.89464	---	49.4565	---		201474_s_at			integrin, alpha 3 (antigen CD49C, alpha 3 subunit of VLA-3 receptor)		ITGA3	integrin, alpha 3 (antigen CD49C, alpha 3 subunit of VLA-3 receptor)
AFFX-r2-Hs18SrRNA-3_s_at	0.0758318	3.55006	---	46.8149	---		201694_s_at			early growth response 1		EGR1	early growth response 1
39402_at	0.201376	8.07754	IL1B	40.1117	NM_000576		202028_s_at			ribosomal protein L38		RPL38	ribosomal protein L38
205067_at	0.207016	8.1473	IL1B	39.3559	NM_000576		202067_s_at			low density lipoprotein receptor (familial hypercholesterolemia)		LDLR	low density lipoprotein receptor (familial hypercholesterolemia)
AFFX-HUMRGE/M10098_3_at	0.094696	3.34552	---	35.329	---		202087_s_at			cathepsin L1		CTSL1	cathepsin L1
221009_s_at	0.0563719	1.8178	ANGPTL4	32.2466	NM_001039667		202375_at			SEC24 related gene family, member D (S. cerevisiae)		SEC24D	SEC24 related gene family, member D (S. cerevisiae)
AFFX-M27830_M_at	0.175443	5.58554	---	31.8369	---		202668_at			ephrin-B2		EFNB2	ephrin-B2
AFFX-M27830_5_at	0.124216	3.58331	---	28.8475	---		202709_at			fibromodulin		FMOD	fibromodulin
205239_at	0.308558	5.60765	AREG /// LOC727738	18.1737	NM_001657		202723_s_at			forkhead box O1		FOXO1	forkhead box O1
214041_x_at	0.339035	4.26543	RPL37A	12.5811	NM_000998		202755_s_at			glypican 1		GPC1	glypican 1
209789_at	0.32517	3.53415	CORO2B	10.8686	NM_006091		202756_s_at			glypican 1		GPC1	glypican 1
215182_x_at	0.347659	3.684	---	10.5966	---		203382_s_at			apolipoprotein E		APOE	apolipoprotein E
213642_at	0.349565	3.20521	---	9.16912	---		203504_s_at			ATP-binding cassette, sub-family A (ABC1), member 1		ABCA1	ATP-binding cassette, sub-family A (ABC1), member 1
212044_s_at	0.253885	2.21031	RPL27A	8.70596	NM_000990		203514_at			mitogen-activated protein kinase kinase kinase 3		MAP3K3	mitogen-activated protein kinase kinase kinase 3
204926_at	0.447501	3.38565	INHBA	7.56568	NM_002192		203735_x_at			PTPRF interacting protein, binding protein 1 (liprin beta 1)		PPFIBP1	PTPRF interacting protein, binding protein 1 (liprin beta 1)
AFFX-r2-Hs28SrRNA-M_at	0.359732	2.56334	---	7.12569	---		203749_s_at			retinoic acid receptor, alpha		RARA	retinoic acid receptor, alpha
214001_x_at	0.282697	2.0092	---	7.10726	---		203920_at			nuclear receptor subfamily 1, group H, member 3		NR1H3	nuclear receptor subfamily 1, group H, member 3
216246_at	0.320217	1.77589	---	5.5459	---		204134_at			phosphodiesterase 2A, cGMP-stimulated		PDE2A	phosphodiesterase 2A, cGMP-stimulated
208322_s_at	0.364236	1.95177	ST3GAL1	5.35853	NM_003033		204268_at			S100 calcium binding protein A2		S100A2	S100 calcium binding protein A2
216609_at	0.402814	2.02724	TXN	5.03269	NM_003329		204468_s_at			tyrosine kinase with immunoglobulin-like and EGF-like domains 1		TIE1	tyrosine kinase with immunoglobulin-like and EGF-like domains 1
201474_s_at	0.434277	2.17335	ITGA3	5.00454	NM_002204		204472_at			GTP binding protein overexpressed in skeletal muscle		GEM	GTP binding protein overexpressed in skeletal muscle
208229_at	0.375147	1.85878	FGFR2	4.95482	NM_000141		204926_at			inhibin, beta A		INHBA	inhibin, beta A
204472_at	0.338592	1.64592	GEM	4.86108	NM_005261		205042_at			glucosamine (UDP-N-acetyl)-2-epimerase/N-acetylmannosamine kinase		GNE	glucosamine (UDP-N-acetyl)-2-epimerase/N-acetylmannosamine kinase
221729_at	0.441862	2.14474	COL5A2	4.85387	NM_000393		205067_at			interleukin 1, beta		IL1B	interleukin 1, beta
221943_x_at	0.376897	1.79991	RPL38	4.7756	NM_000999		205128_x_at			prostaglandin-endoperoxide synthase 1 (prostaglandin G/H synthase and cyclooxygenase)		PTGS1	prostaglandin-endoperoxide synthase 1 (prostaglandin G/H synthase and cyclooxygenase)
217875_s_at	0.51877	2.44448	PMEPA1	4.71206	NM_020182		205190_at			plastin 1 (I isoform)		PLS1	plastin 1 (I isoform)
214057_at	0.327103	1.4857	MCL1	4.54199	NM_021960		205239_at			amphiregulin (schwannoma-derived growth factor) /// similar to Amphiregulin precursor (AR) (Colorectum cell-derived growth factor) (CRDGF)		AREG /// LOC727738	amphiregulin (schwannoma-derived growth factor) /// similar to Amphiregulin precursor (AR) (Colorectum cell-derived growth factor) (CRDGF)
210098_s_at	0.436723	1.9546	---	4.47562	---		205266_at			leukemia inhibitory factor (cholinergic differentiation factor)		LIF	leukemia inhibitory factor (cholinergic differentiation factor)
202028_s_at	0.455853	1.92076	RPL38	4.21355	NM_000999		205357_s_at			angiotensin II receptor, type 1		AGTR1	angiotensin II receptor, type 1
222329_x_at	0.670104	2.63852	---	3.93748	---		205566_at			abhydrolase domain containing 2		ABHD2	abhydrolase domain containing 2
206543_at	0.378056	1.44786	SMARCA2	3.82975	NM_003070		205678_at			adaptor-related protein complex 3, beta 2 subunit		AP3B2	adaptor-related protein complex 3, beta 2 subunit
214395_x_at	0.448414	1.69621	---	3.78269	---		205832_at			carboxypeptidase A4		CPA4	carboxypeptidase A4
219954_s_at	0.354953	1.34199	GBA3	3.78074	NM_020973		205847_at			protease, serine, 22		PRSS22	protease, serine, 22
221960_s_at	0.342473	1.28076	RAB2A	3.73973	NM_002865		205896_at			solute carrier family 22 (organic cation/ergothioneine transporter), member 4		SLC22A4	solute carrier family 22 (organic cation/ergothioneine transporter), member 4
206692_at	0.53084	1.94577	KCNJ10	3.66544	NM_002241		205960_at			pyruvate dehydrogenase kinase, isozyme 4		PDK4	pyruvate dehydrogenase kinase, isozyme 4
215450_at	0.412823	1.45785	---	3.53142	---		205998_x_at			cytochrome P450, family 3, subfamily A, polypeptide 4		CYP3A4	cytochrome P450, family 3, subfamily A, polypeptide 4
213281_at	0.369093	1.28498	JUN	3.48146	NM_002228		206178_at			phospholipase A2, group V		PLA2G5	phospholipase A2, group V
202723_s_at	0.518614	1.78695	FOXO1	3.44562	NM_002015		206186_at			membrane protein, palmitoylated 3 (MAGUK p55 subfamily member 3)		MPP3	membrane protein, palmitoylated 3 (MAGUK p55 subfamily member 3)
216371_at	0.530618	1.82585	---	3.441	---		206438_x_at			tectonic family member 2		TCTN2	tectonic family member 2
216554_s_at	0.42058	1.43657	---	3.4157	---		206543_at			SWI/SNF related, matrix associated, actin dependent regulator of chromatin, subfamily a, member 2		SMARCA2	SWI/SNF related, matrix associated, actin dependent regulator of chromatin, subfamily a, member 2
202668_at	0.625457	2.12357	EFNB2	3.39523	NM_004093		206568_at			transition protein 1 (during histone to protamine replacement)		TNP1	transition protein 1 (during histone to protamine replacement)
205042_at	0.442953	1.50289	GNE	3.39288	NM_005476		206692_at			potassium inwardly-rectifying channel, subfamily J, member 10		KCNJ10	potassium inwardly-rectifying channel, subfamily J, member 10
221444_at	0.408092	1.35822	TAS2R16	3.32823	NM_016945		206816_s_at			sperm associated antigen 8		SPAG8	sperm associated antigen 8
210422_x_at	0.626457	2.05746	SLC11A1	3.28428	NM_000578		206878_at			D-amino-acid oxidase		DAO	D-amino-acid oxidase
206178_at	0.432225	1.4118	PLA2G5	3.26636	NM_000929		207131_x_at			gamma-glutamyltransferase 1		GGT1	gamma-glutamyltransferase 1
215870_s_at	0.406787	1.32257	PLA2G5	3.25127	NM_000929		207152_at			neurotrophic tyrosine kinase, receptor, type 2		NTRK2	neurotrophic tyrosine kinase, receptor, type 2
202756_s_at	0.584289	1.8954	GPC1	3.24394	NM_002081		207389_at			glycoprotein Ib (platelet), alpha polypeptide		GP1BA	glycoprotein Ib (platelet), alpha polypeptide
206568_at	0.495056	1.60402	TNP1	3.24007	NM_003284		207425_s_at			septin 9		2008-09-09	septin 9
217580_x_at	0.59755	1.90135	---	3.18192	---		207608_x_at			cytochrome P450, family 1, subfamily A, polypeptide 2		CYP1A2	cytochrome P450, family 1, subfamily A, polypeptide 2
216450_x_at	0.448529	1.42399	HSP90B1	3.17479	NM_003299		207688_s_at			---		---	---
216989_at	0.538442	1.70637	SPAM1	3.1691	NM_003117		207765_s_at			KIAA1539		KIAA1539	KIAA1539
217173_s_at	0.507716	1.59341	LDLR	3.13839	NM_000527		207919_at			ADP-ribosyltransferase 1		ART1	ADP-ribosyltransferase 1
207951_at	0.445649	1.3974	CSN2	3.13565	NM_001891		207951_at			casein beta		CSN2	casein beta
205960_at	0.378376	1.18509	PDK4	3.13205	NM_002612		207969_x_at			acrosomal vesicle protein 1		ACRV1	acrosomal vesicle protein 1
216110_x_at	0.526423	1.64877	---	3.13202	---		208048_at			tachykinin receptor 1		TACR1	tachykinin receptor 1
220682_s_at	0.446835	1.39718	---	3.12683	---		208217_at			gamma-aminobutyric acid (GABA) receptor, rho 2		GABRR2	gamma-aminobutyric acid (GABA) receptor, rho 2
213112_s_at	0.39328	1.22598	SQSTM1	3.11732	NM_003900		208229_at			fibroblast growth factor receptor 2 (bacteria-expressed kinase, keratinocyte growth factor receptor, craniofacial dysostosis 1, Crouzon syndrome, Pfeiffer syndrome, Jackson-Weiss syndrome)		FGFR2	fibroblast growth factor receptor 2 (bacteria-expressed kinase, keratinocyte growth factor receptor, craniofacial dysostosis 1, Crouzon syndrome, Pfeiffer syndrome, Jackson-Weiss syndrome)
209242_at	0.557991	1.73888	PEG3	3.11632	NM_006210		208322_s_at			ST3 beta-galactoside alpha-2,3-sialyltransferase 1		ST3GAL1	ST3 beta-galactoside alpha-2,3-sialyltransferase 1
221841_s_at	0.466685	1.45135	KLF4	3.1099	NM_004235		208360_s_at			---		---	---
217383_at	0.448819	1.39217	PGK1	3.10186	NM_000291		208448_x_at			interferon, alpha 16		IFNA16	interferon, alpha 16
210280_at	0.517105	1.60075	MPZ	3.0956	NM_000530		208486_at			dopamine receptor D5		DRD5	dopamine receptor D5
213705_at	0.55144	1.7045	---	3.09099	---		208551_at			histone cluster 1, H4g		HIST1H4G	histone cluster 1, H4g
203504_s_at	0.66459	2.05141	ABCA1	3.08673	NM_005502		208578_at			sodium channel, voltage-gated, type X, alpha subunit		SCN10A	sodium channel, voltage-gated, type X, alpha subunit
208048_at	0.418275	1.28734	TACR1	3.07774	NM_001058		208849_at			protein phosphatase 1, regulatory (inhibitor) subunit 8		PPP1R8	protein phosphatase 1, regulatory (inhibitor) subunit 8
213826_s_at	0.504967	1.5482	LOC100133109	3.06594	XM_001716009		209156_s_at			collagen, type VI, alpha 2		COL6A2	collagen, type VI, alpha 2
220266_s_at	0.430724	1.3167	KLF4	3.05694	NM_004235		209159_s_at			NDRG family member 4		NDRG4	NDRG family member 4
213307_at	0.448678	1.37064	SHANK2	3.05485	NM_012309		209242_at			paternally expressed 3		PEG3	paternally expressed 3
205896_at	0.590437	1.79693	SLC22A4	3.0434	NM_003059		209646_x_at			aldehyde dehydrogenase 1 family, member B1		ALDH1B1	aldehyde dehydrogenase 1 family, member B1
202087_s_at	0.602535	1.81744	CTSL1	3.01631	NM_001912 /// NM_145918		209701_at			endoplasmic reticulum aminopeptidase 1		ERAP1	endoplasmic reticulum aminopeptidase 1
202067_s_at	0.579175	1.73732	LDLR	2.99964	NM_000527		209738_x_at			pregnancy specific beta-1-glycoprotein 6		PSG6	pregnancy specific beta-1-glycoprotein 6
204134_at	0.448573	1.3367	PDE2A	2.97989	NM_002599		209757_s_at			v-myc myelocytomatosis viral related oncogene, neuroblastoma derived (avian)		MYCN	v-myc myelocytomatosis viral related oncogene, neuroblastoma derived (avian)
216580_at	0.564568	1.67188	hCG_2015956 /// LOC100127893 /// LOC100130892 /// LOC100131085 /// LOC388401 /// LOC441896 /// LOC641900 /// LOC646346 /// LOC728380 /// LOC728843 /// RPL7	2.96135	NM_000971 /// XM_001719048 /// XM_001720172 /// XM_001722435 /// XM_001722574 /// XM_001725978 /// XM_943842 /// XR_015391 /// XR_015500 /// XR_015600 /// XR_015705 /// XR_016234 /// XR_016879 /// XR_017105 /// XR_018042 /// XR_018794 /// XR_019544 /// XR_038286 /// XR_038691 /// XR_038779 /// XR_038885 /// XR_038901 /// XR_038947 /// XR_039043 /// XR_039090 /// XR_039345 /// XR_039473 /// XR_039…		209789_at			coronin, actin binding protein, 2B		CORO2B	coronin, actin binding protein, 2B
214175_x_at	0.456712	1.35225	PDLIM4	2.96084	NM_003687		210088_x_at			myosin, light chain 4, alkali; atrial, embryonic		MYL4	myosin, light chain 4, alkali; atrial, embryonic
215883_at	0.511002	1.51095	CTNNA1	2.95684	NM_001903		210089_s_at			laminin, alpha 4		LAMA4	laminin, alpha 4
217473_x_at	0.689006	2.03696	SLC11A1	2.95638	NM_000578		210098_s_at			---		---	---
209159_s_at	0.616513	1.82089	NDRG4	2.95354	NM_020465 /// NM_022910		210195_s_at			pregnancy specific beta-1-glycoprotein 1		PSG1	pregnancy specific beta-1-glycoprotein 1
219516_at	0.626295	1.84952	TRPV4	2.95311	NM_021625 /// NM_147204		210210_at			myelin protein zero-like 1		MPZL1	myelin protein zero-like 1
221359_at	0.585583	1.72008	GDNF	2.93738	NM_000514 /// NM_199231 /// NM_199234		210271_at			neurogenic differentiation 2		NEUROD2	neurogenic differentiation 2
1494_f_at	0.520752	1.51619	CYP2A6	2.91154	NM_000762		210280_at			myelin protein zero (Charcot-Marie-Tooth neuropathy 1B)		MPZ	myelin protein zero (Charcot-Marie-Tooth neuropathy 1B)
205128_x_at	0.61206	1.77009	PTGS1	2.89202	NM_000962 /// NM_080591		210422_x_at			solute carrier family 11 (proton-coupled divalent metal ion transporters), member 1		SLC11A1	solute carrier family 11 (proton-coupled divalent metal ion transporters), member 1
221815_at	0.464376	1.33531	ABHD2	2.8755	NM_007011 /// NM_152924		210457_x_at			high mobility group AT-hook 1		HMGA1	high mobility group AT-hook 1
219599_at	0.559895	1.60989	EIF4B	2.87535	NM_001417		210511_s_at			inhibin, beta A		INHBA	inhibin, beta A
217471_at	0.420289	1.20701	---	2.87185	---		210517_s_at			A kinase (PRKA) anchor protein (gravin) 12		AKAP12	A kinase (PRKA) anchor protein (gravin) 12
215874_at	0.584493	1.67173	---	2.86014	---		210704_at			fasciculation and elongation protein zeta 2 (zygin II)		FEZ2	fasciculation and elongation protein zeta 2 (zygin II)
37802_r_at	0.629263	1.79628	FAM63B	2.85458	NM_001040450 /// NM_001040453		210797_s_at			2'-5'-oligoadenylate synthetase-like		OASL	2'-5'-oligoadenylate synthetase-like
222187_x_at	0.597069	1.69549	G3BP1	2.83968	NM_005754 /// NM_198395		211364_at			methylthioadenosine phosphorylase		MTAP	methylthioadenosine phosphorylase
207688_s_at	0.597366	1.69487	---	2.83724	---		211388_s_at			---		---	---
202375_at	0.639032	1.77155	SEC24D	2.77224	NM_014822		211416_x_at			gamma-glutamyltransferase light chain 1		GGTLC1	gamma-glutamyltransferase light chain 1
213553_x_at	0.616235	1.70156	APOC1	2.76122	NM_001645		211454_x_at			FKSG49		FKSG49	FKSG49
221394_at	0.592467	1.62075	TAAR2	2.7356	NM_001033080 /// NM_014626		211590_x_at			thromboxane A2 receptor		TBXA2R	thromboxane A2 receptor
213638_at	0.57464	1.57035	PHACTR1	2.73276	NM_030948		211697_x_at			partner of NOB1 homolog (S. cerevisiae)		PNO1	partner of NOB1 homolog (S. cerevisiae)
217484_at	0.575672	1.57143	CR1	2.72973	NM_000573 /// NM_000651		211795_s_at			FYN binding protein (FYB-120/130)		FYB	FYN binding protein (FYB-120/130)
205190_at	0.577562	1.55401	PLS1	2.69064	NM_002670		211826_s_at			AF4/FMR2 family, member 1		AFF1	AF4/FMR2 family, member 1
208360_s_at	0.528064	1.42003	---	2.68912	---		212044_s_at			Ribosomal protein L27a		RPL27A	Ribosomal protein L27a
213120_at	0.616524	1.65427	UHRF1BP1L	2.68323	NM_001006947 /// NM_015054		212128_s_at			dystroglycan 1 (dystrophin-associated glycoprotein 1)		DAG1	dystroglycan 1 (dystrophin-associated glycoprotein 1)
217207_s_at	0.74112	1.96819	BTNL3	2.65569	NM_197975		212531_at			lipocalin 2		LCN2	lipocalin 2
203382_s_at	0.675993	1.7893	APOE	2.64692	NM_000041		213112_s_at			sequestosome 1		SQSTM1	sequestosome 1
216363_at	0.558862	1.47709	---	2.64303	---		213120_at			UHRF1 (ICBP90) binding protein 1-like		UHRF1BP1L	UHRF1 (ICBP90) binding protein 1-like
213409_s_at	0.666847	1.76168	RHEB	2.64181	NM_005614		213281_at			Jun oncogene		JUN	Jun oncogene
209738_x_at	0.700062	1.84242	PSG6	2.6318	NM_001031850 /// NM_002782		213307_at			SH3 and multiple ankyrin repeat domains 2		SHANK2	SH3 and multiple ankyrin repeat domains 2
211388_s_at	0.469962	1.23182	---	2.62111	---		213409_s_at			Ras homolog enriched in brain		RHEB	Ras homolog enriched in brain
207389_at	0.811857	2.11886	GP1BA	2.60989	NM_000173		213553_x_at			apolipoprotein C-I		APOC1	apolipoprotein C-I
203920_at	0.522233	1.35725	NR1H3	2.59893	NM_005693		213638_at			phosphatase and actin regulator 1		PHACTR1	phosphatase and actin regulator 1
209156_s_at	0.693274	1.78907	COL6A2	2.58061	NM_001849 /// NM_058174 /// NM_058175		213642_at			---		---	---
220703_at	0.514277	1.32261	C10orf110	2.57179	XR_039896 /// XR_039897 /// XR_039898		213705_at			CDNA FLJ30007 fis, clone 3NB692000012		---	CDNA FLJ30007 fis, clone 3NB692000012
219892_at	0.445635	1.1433	TM6SF1	2.56555	NM_023003		213813_x_at			---		---	---
216323_x_at	0.610568	1.5663	TUBA3C /// TUBA3D	2.56531	NM_006001 /// NM_080386		213826_s_at			similar to histone		LOC100133109	similar to histone
214313_s_at	0.532771	1.34808	EIF5B	2.53032	NM_015904		213875_x_at			chromosome 6 open reading frame 62		C6orf62	chromosome 6 open reading frame 62
207152_at	0.597459	1.50114	NTRK2	2.51254	NM_001007097 /// NM_001018064 /// NM_001018065 /// NM_001018066 /// NM_006180		214001_x_at			CDNA: FLJ21700 fis, clone COL09849, highly similar to HSU14972 Human ribosomal protein S10 mRNA		---	CDNA: FLJ21700 fis, clone COL09849, highly similar to HSU14972 Human ribosomal protein S10 mRNA
212128_s_at	0.747003	1.87678	DAG1	2.51241	NM_004393		214041_x_at			Ribosomal protein L37a		RPL37A	Ribosomal protein L37a
217541_x_at	0.630348	1.57788	ZNF321 /// ZNF816A	2.50319	NM_001031665 /// NM_203307		214057_at			Myeloid cell leukemia sequence 1 (BCL2-related)		MCL1	Myeloid cell leukemia sequence 1 (BCL2-related)
207919_at	0.633131	1.58147	ART1	2.49786	NM_004314		214087_s_at			myosin binding protein C, slow type		MYBPC1	myosin binding protein C, slow type
219025_at	0.700489	1.74529	CD248	2.49153	NM_020404		214175_x_at			PDZ and LIM domain 4		PDLIM4	PDZ and LIM domain 4
218691_s_at	0.483781	1.19697	PDLIM4	2.47421	NM_003687		214205_x_at			glutaredoxin 3		GLRX3	glutaredoxin 3
216372_at	0.57911	1.42957	---	2.46856	---		214313_s_at			Eukaryotic translation initiation factor 5B		EIF5B	Eukaryotic translation initiation factor 5B
208486_at	0.570336	1.40762	DRD5	2.46805	NM_000798		214395_x_at			CDNA clone IMAGE:4838699		---	CDNA clone IMAGE:4838699
216322_at	0.708077	1.74425	CD58	2.46336	NM_001779		214594_x_at			ATPase, class I, type 8B, member 1		ATP8B1	ATPase, class I, type 8B, member 1
218368_s_at	0.70019	1.72357	TNFRSF12A	2.46158	NM_016639		214888_at			calpain 2, (m/II) large subunit		CAPN2	calpain 2, (m/II) large subunit
208448_x_at	0.477724	1.17117	IFNA16	2.45156	NM_002173		215182_x_at			MRNA; cDNA DKFZp586E121 (from clone DKFZp586E121)		---	MRNA; cDNA DKFZp586E121 (from clone DKFZp586E121)
212531_at	0.516194	1.25969	LCN2	2.44035	NM_005564		215450_at			---		---	---
219532_at	0.513635	1.24443	ELOVL4	2.42279	NM_022726		215557_at			CDNA FLJ10146 fis, clone HEMBA1003327		---	CDNA FLJ10146 fis, clone HEMBA1003327
217136_at	0.46308	1.11382	LOC653505 /// LOC653598 /// PPIAL4 /// RP6-206I17.5	2.40524	NM_001123068 /// NM_178230 /// XM_927706 /// XM_927767 /// XM_928338		215584_at			HECT, C2 and WW domain containing E3 ubiquitin protein ligase 1		HECW1	HECT, C2 and WW domain containing E3 ubiquitin protein ligase 1
210457_x_at	0.879341	2.11419	HMGA1	2.40429	NM_002131 /// NM_145899 /// NM_145901 /// NM_145902 /// NM_145903 /// NM_145904 /// NM_145905		215775_at			Thrombospondin 1		THBS1	Thrombospondin 1
201261_x_at	0.55875	1.34073	BGN	2.39952	NM_001711		215870_s_at			phospholipase A2, group V		PLA2G5	phospholipase A2, group V
200808_s_at	0.817828	1.95598	ZYX	2.39168	NM_001010972 /// NM_003461		215874_at			CDNA: FLJ23167 fis, clone LNG09902		---	CDNA: FLJ23167 fis, clone LNG09902
206186_at	0.607431	1.45037	MPP3	2.38771	NM_001932 /// NR_003562		215883_at			Catenin (cadherin-associated protein), alpha 1, 102kDa		CTNNA1	Catenin (cadherin-associated protein), alpha 1, 102kDa
216453_at	0.77833	1.84188	ZNF287	2.36645	NM_020653		216025_x_at			cytochrome P450, family 2, subfamily C, polypeptide 9		CYP2C9	cytochrome P450, family 2, subfamily C, polypeptide 9
220475_at	0.613455	1.45015	SLC28A3	2.3639	NM_022127		216054_x_at			myosin, light chain 4, alkali; atrial, embryonic		MYL4	myosin, light chain 4, alkali; atrial, embryonic
203735_x_at	0.6186	1.45678	PPFIBP1	2.35496	NM_003622 /// NM_177444		216110_x_at			CDNA FLJ14080 fis, clone HEMBB1002152		---	CDNA FLJ14080 fis, clone HEMBB1002152
210511_s_at	0.922209	2.16714	INHBA	2.34994	NM_002192		216177_at			similar to hCG2041276		LOC391132	similar to hCG2041276
213813_x_at	0.867129	2.03636	---	2.34839	---		216203_at			serine palmitoyltransferase, long chain base subunit 2		SPTLC2	serine palmitoyltransferase, long chain base subunit 2
210088_x_at	0.630066	1.47842	MYL4	2.34646	NM_001002841 /// NM_002476		216246_at			---		---	---
210195_s_at	0.547952	1.28425	PSG1	2.34373	NM_006905		216318_at			Immunoglobulin heavy constant mu		IGHG1	Immunoglobulin heavy constant mu
211454_x_at	0.640436	1.49936	FKSG49	2.34116	XR_041698		216322_at			CD58 molecule		CD58	CD58 molecule
206438_x_at	0.640054	1.49697	TCTN2	2.33881	NM_024809		216323_x_at			tubulin, alpha 3c /// tubulin, alpha 3d		TUBA3C /// TUBA3D	tubulin, alpha 3c /// tubulin, alpha 3d
205566_at	0.631142	1.47466	ABHD2	2.33649	NM_007011 /// NM_152924		216363_at			---		---	---
216203_at	0.551457	1.28347	SPTLC2	2.32742	NM_004863		216371_at			---		---	---
213875_x_at	0.673758	1.56803	C6orf62	2.32729	NM_030939		216372_at			---		---	---
220166_at	0.588555	1.36706	CNNM1	2.32274	NM_020348		216450_x_at			heat shock protein 90kDa beta (Grp94), member 1		HSP90B1	heat shock protein 90kDa beta (Grp94), member 1
201147_s_at	0.786475	1.82542	TIMP3	2.32101	NM_000362		216453_at			zinc finger protein 287		ZNF287	zinc finger protein 287
210704_at	0.720966	1.67115	FEZ2	2.31794	NM_001042548 /// NM_005102		216497_at			heterogeneous nuclear ribonucleoprotein A1 /// similar to heterogeneous nuclear ribonucleoprotein A1 /// heterogeneous nuclear ribonucleoprotein A1-like /// hypothetical LOC642817 /// similar to Heterogeneous nuclear ribonucleoprotein A1 (Helix-destabilizing protein) (Single-strand binding protein) (hnRNP core protein A1) (HDP-1) (Topoisomerase-inhibitor suppressed) /// hypothetical LOC644037 ///…		HNRNPA1 /// HNRPA1L-2 /// HNRPA1P5 /// LOC100128701 /// LOC100128836 /// LOC120364 /// LOC391670 /// LOC402112 /// LOC440125 /// LOC642817 /// LOC643033 /// LOC644037 /// LOC645001 /// LOC728170 /// LOC728643 /// LOC728732 /// LOC729102 /// LOC729366 /// LOC730246 /// RP11-78J21.1	heterogeneous nuclear ribonucleoprotein A1 /// similar to heterogeneous nuclear ribonucleoprotein A1 /// heterogeneous nuclear ribonucleoprotein A1-like /// hypothetical LOC642817 /// similar to Heterogeneous nuclear ribonucleoprotein A1 (Helix-destabilizing protein) (Single-strand binding protein) (hnRNP core protein A1) (HDP-1) (Topoisomerase-inhibitor suppressed) /// hypothetical LOC644037 ///…
206878_at	0.634847	1.46636	DAO	2.30978	NM_001917		216554_s_at			---		---	---
207425_s_at	0.801296	1.84397	2008-09-09	2.30123	NM_001113491 /// NM_001113492 /// NM_001113493 /// NM_001113494 /// NM_001113495 /// NM_001113496 /// NM_006640		216580_at			ribosomal protein L7 /// similar to ribosomal protein L7 /// similar to 60S ribosomal protein L7 /// hCG2015956 /// hypothetical LOC728380 /// hypothetical LOC728843 /// hypothetical protein LOC100130892 /// hypothetical LOC100131085		hCG_2015956 /// LOC100127893 /// LOC100130892 /// LOC100131085 /// LOC388401 /// LOC441896 /// LOC641900 /// LOC646346 /// LOC728380 /// LOC728843 /// RPL7	ribosomal protein L7 /// similar to ribosomal protein L7 /// similar to 60S ribosomal protein L7 /// hCG2015956 /// hypothetical LOC728380 /// hypothetical LOC728843 /// hypothetical protein LOC100130892 /// hypothetical LOC100131085
216497_at	0.714793	1.63947	HNRNPA1 /// HNRPA1L-2 /// HNRPA1P5 /// LOC100128701 /// LOC100128836 /// LOC120364 /// LOC391670 /// LOC402112 /// LOC440125 /// LOC642817 /// LOC643033 /// LOC644037 /// LOC645001 /// LOC728170 /// LOC728643 /// LOC728732 /// LOC729102 /// LOC729366 /// LOC730246 /// RP11-78J21.1	2.29364	NM_001011724 /// NM_001011725 /// NM_002136 /// NM_031157 /// NR_002944 /// NR_003277 /// XM_001718684 /// XM_062025 /// XM_937967 /// XR_015330 /// XR_015514 /// XR_015658 /// XR_015746 /// XR_015895 /// XR_015958 /// XR_015974 /// XR_016080 /// XR_016093 /// XR_016314 /// XR_016373 /// XR_016388 /// XR_017084 /// XR_017337 /// XR_017501 /// XR_018564 /// XR_019025 /// XR_019262 /// XR_019573 //…		216609_at			Thioredoxin		TXN	Thioredoxin
221917_s_at	0.627245	1.43824	GRSF1	2.29295	NM_001098477 /// NM_002092		216699_s_at			kallikrein 1		KLK1	kallikrein 1
206816_s_at	0.627395	1.43129	SPAG8	2.28132	NM_001039592 /// NM_172312		216959_x_at			neuronal cell adhesion molecule		NRCAM	neuronal cell adhesion molecule
214594_x_at	0.695465	1.58105	ATP8B1	2.27337	NM_005603		216989_at			sperm adhesion molecule 1 (PH-20 hyaluronidase, zona pellucida binding)		SPAM1	sperm adhesion molecule 1 (PH-20 hyaluronidase, zona pellucida binding)
207131_x_at	0.698308	1.58048	GGT1	2.2633	NM_001032364 /// NM_001032365 /// NM_005265 /// NM_013430		217052_x_at			---		---	---
200630_x_at	0.626703	1.41719	SET	2.26133	NM_001122821 /// NM_003011		217136_at			peptidylprolyl isomerase A (cyclophilin A)-like 4 /// peptidylprolyl isomerase A (cyclophilin A)-like /// similar to cyclophilin-LC (COAS2)		LOC653505 /// LOC653598 /// PPIAL4 /// RP6-206I17.5	peptidylprolyl isomerase A (cyclophilin A)-like 4 /// peptidylprolyl isomerase A (cyclophilin A)-like /// similar to cyclophilin-LC (COAS2)
215584_at	0.634886	1.43417	HECW1	2.25894	NM_015052		217149_x_at			tyrosine kinase, non-receptor, 1		TNK1	tyrosine kinase, non-receptor, 1
207608_x_at	0.619275	1.39851	CYP1A2	2.2583	NM_000761		217173_s_at			low density lipoprotein receptor (familial hypercholesterolemia)		LDLR	low density lipoprotein receptor (familial hypercholesterolemia)
216054_x_at	0.650837	1.46927	MYL4	2.2575	NM_001002841 /// NM_002476		217207_s_at			butyrophilin-like 3		BTNL3	butyrophilin-like 3
218966_at	0.63983	1.44439	MYO5C	2.25746	NM_018728		217383_at			Phosphoglycerate kinase 1		PGK1	Phosphoglycerate kinase 1
203749_s_at	0.847744	1.9133	RARA	2.25693	NM_000964 /// NM_001024809		217471_at			MRNA; cDNA DKFZp586B1324 (from clone DKFZp586B1324)		---	MRNA; cDNA DKFZp586B1324 (from clone DKFZp586B1324)
210517_s_at	0.648785	1.46182	AKAP12	2.25316	NM_005100 /// NM_144497		217473_x_at			solute carrier family 11 (proton-coupled divalent metal ion transporters), member 1		SLC11A1	solute carrier family 11 (proton-coupled divalent metal ion transporters), member 1
205266_at	0.655749	1.47167	LIF	2.24425	NM_002309		217484_at			complement component (3b/4b) receptor 1 (Knops blood group)		CR1	complement component (3b/4b) receptor 1 (Knops blood group)
208849_at	0.777696	1.74428	PPP1R8	2.24288	NM_002713 /// NM_014110 /// NM_138558		217541_x_at			zinc finger protein 816A /// zinc finger protein 321		ZNF321 /// ZNF816A	zinc finger protein 816A /// zinc finger protein 321
205998_x_at	0.615998	1.37671	CYP3A4	2.23493	NM_017460		217580_x_at			Transcribed locus		---	Transcribed locus
210210_at	0.564818	1.26118	MPZL1	2.2329	NM_003953 /// NM_024569		217629_at			Transcribed locus		---	Transcribed locus
202709_at	0.672909	1.49778	FMOD	2.22583	NM_002023		217875_s_at			prostate transmembrane protein, androgen induced 1		PMEPA1	prostate transmembrane protein, androgen induced 1
216318_at	0.715703	1.59218	IGHG1	2.22463	---		218255_s_at			fibrosin		FBRS	fibrosin
220115_s_at	0.560596	1.24613	CDH10	2.22286	NM_006727		218368_s_at			tumor necrosis factor receptor superfamily, member 12A		TNFRSF12A	tumor necrosis factor receptor superfamily, member 12A
207969_x_at	0.635324	1.41179	ACRV1	2.22216	NM_001612 /// NM_020069 /// NM_020107 /// NM_020108 /// NM_020109 /// NM_020110 /// NM_020111 /// NM_020113 /// NM_020115		218691_s_at			PDZ and LIM domain 4		PDLIM4	PDZ and LIM domain 4
210797_s_at	0.532479	1.1806	OASL	2.21718	NM_003733 /// NM_198213		218966_at			myosin VC		MYO5C	myosin VC
211416_x_at	0.718757	1.59286	GGTLC1	2.21613	NM_080920 /// NM_178311 /// NM_178312		219025_at			CD248 molecule, endosialin		CD248	CD248 molecule, endosialin
209701_at	0.594945	1.31722	ERAP1	2.21402	NM_001040458 /// NM_016442		219516_at			transient receptor potential cation channel, subfamily V, member 4		TRPV4	transient receptor potential cation channel, subfamily V, member 4
207765_s_at	0.609363	1.34715	KIAA1539	2.21075	NM_025182		219532_at			elongation of very long chain fatty acids (FEN1/Elo2, SUR4/Elo3, yeast)-like 4		ELOVL4	elongation of very long chain fatty acids (FEN1/Elo2, SUR4/Elo3, yeast)-like 4
205678_at	0.647351	1.42914	AP3B2	2.20768	NM_004644		219599_at			eukaryotic translation initiation factor 4B		EIF4B	eukaryotic translation initiation factor 4B
217629_at	0.713016	1.57058	---	2.20273	---		219741_x_at			zinc finger protein 552		ZNF552	zinc finger protein 552
216959_x_at	0.566816	1.24019	NRCAM	2.18799	NM_001037132 /// NM_001037133 /// NM_005010		219892_at			transmembrane 6 superfamily member 1		TM6SF1	transmembrane 6 superfamily member 1
216025_x_at	0.618012	1.34611	CYP2C9	2.17812	NM_000771		219954_s_at			glucosidase, beta, acid 3 (cytosolic)		GBA3	glucosidase, beta, acid 3 (cytosolic)
203514_at	0.652905	1.4213	MAP3K3	2.17689	NM_002401 /// NM_203351		220115_s_at			cadherin 10, type 2 (T2-cadherin)		CDH10	cadherin 10, type 2 (T2-cadherin)
201694_s_at	0.732362	1.59033	EGR1	2.17151	NM_001964		220166_at			cyclin M1		CNNM1	cyclin M1
214205_x_at	0.76027	1.64434	GLRX3	2.16284	NM_006541		220266_s_at			Kruppel-like factor 4 (gut)		KLF4	Kruppel-like factor 4 (gut)
32540_at	0.736509	1.5854	PPP3CC	2.15258	NM_005605		220475_at			solute carrier family 28 (sodium-coupled nucleoside transporter), member 3		SLC28A3	solute carrier family 28 (sodium-coupled nucleoside transporter), member 3
214087_s_at	0.71482	1.53849	MYBPC1	2.15227	NM_002465 /// NM_206819 /// NM_206820 /// NM_206821		220545_s_at			testis-specific kinase substrate		TSKS	testis-specific kinase substrate
211364_at	0.729888	1.5609	MTAP	2.13855	NM_002451		220682_s_at			---		---	---
222370_x_at	0.647969	1.38538	---	2.13804	---		220703_at			chromosome 10 open reading frame 110		C10orf110	chromosome 10 open reading frame 110
202755_s_at	0.905541	1.93606	GPC1	2.13802	NM_002081		221009_s_at			angiopoietin-like 4		ANGPTL4	angiopoietin-like 4
210089_s_at	0.643742	1.36596	LAMA4	2.12191	NM_001105206 /// NM_001105207 /// NM_001105208 /// NM_001105209 /// NM_002290		221033_s_at			ring finger protein 17		RNF17	ring finger protein 17
208578_at	0.726976	1.53531	SCN10A	2.11191	NM_006514		221339_at			olfactory receptor, family 10, subfamily C, member 1		OR10C1	olfactory receptor, family 10, subfamily C, member 1
221339_at	0.667666	1.40903	OR10C1	2.11038	NM_013941		221359_at			glial cell derived neurotrophic factor		GDNF	glial cell derived neurotrophic factor
216177_at	0.679806	1.43448	LOC391132	2.11013	XR_017287 /// XR_018883 /// XR_038069		221394_at			trace amine associated receptor 2		TAAR2	trace amine associated receptor 2
211590_x_at	0.85954	1.81205	TBXA2R	2.10817	NM_001060 /// NM_201636		221444_at			taste receptor, type 2, member 16		TAS2R16	taste receptor, type 2, member 16
216699_s_at	0.908591	1.91126	KLK1	2.10354	NM_002257		221729_at			collagen, type V, alpha 2		COL5A2	collagen, type V, alpha 2
215557_at	0.509654	1.06938	---	2.09825	---		221815_at			abhydrolase domain containing 2		ABHD2	abhydrolase domain containing 2
219741_x_at	0.905081	1.89722	ZNF552	2.09619	NM_024762		221841_s_at			Kruppel-like factor 4 (gut)		KLF4	Kruppel-like factor 4 (gut)
221033_s_at	0.65307	1.36348	RNF17	2.0878	NM_031277		221917_s_at			G-rich RNA sequence binding factor 1		GRSF1	G-rich RNA sequence binding factor 1
208217_at	0.785175	1.63545	GABRR2	2.08291	NM_002043		221943_x_at			Ribosomal protein L38		RPL38	Ribosomal protein L38
217052_x_at	0.7198	1.49368	---	2.07513	---		221960_s_at			RAB2A, member RAS oncogene family		RAB2A	RAB2A, member RAS oncogene family
208551_at	0.736024	1.52479	HIST1H4G	2.07166	NM_003547		222187_x_at			GTPase activating protein (SH3 domain) binding protein 1		G3BP1	GTPase activating protein (SH3 domain) binding protein 1
201404_x_at	0.673107	1.39326	PSMB2	2.06989	NM_002794		222329_x_at			---		---	---
209757_s_at	0.942904	1.94172	MYCN	2.0593	NM_005378		222370_x_at			---		---	---
214888_at	0.689689	1.4187	CAPN2	2.05702	NM_001748		32540_at			Protein phosphatase 3 (formerly 2B), catalytic subunit, gamma isoform		PPP3CC	Protein phosphatase 3 (formerly 2B), catalytic subunit, gamma isoform
211795_s_at	0.882782	1.80679	FYB	2.0467	NM_001465 /// NM_199335		37802_r_at			family with sequence similarity 63, member B		FAM63B	family with sequence similarity 63, member B
211697_x_at	0.656993	1.34338	PNO1	2.04474	NM_020143		39402_at			interleukin 1, beta		IL1B	interleukin 1, beta
217149_x_at	0.773838	1.58191	TNK1	2.04424	NM_003985		AFFX-HUMRGE/M10098_3_at			---		---	---
209646_x_at	0.704872	1.44043	ALDH1B1	2.04354	NM_000692		AFFX-HUMRGE/M10098_5_at			---		---	---
205847_at	0.8834	1.80341	PRSS22	2.04145	NM_022119		AFFX-HUMRGE/M10098_M_at			---		---	---
215775_at	0.655399	1.33358	THBS1	2.03475	NM_003246		AFFX-M27830_5_at			---		---	---
211826_s_at	0.663077	1.34488	AFF1	2.02824	NM_005935		AFFX-M27830_M_at			---		---	---
220545_s_at	0.658389	1.32904	TSKS	2.01863	NM_021733		AFFX-r2-Hs18SrRNA-3_s_at			---		---	---
205357_s_at	0.626135	1.26084	AGTR1	2.01369	NM_000685 /// NM_004835 /// NM_009585 /// NM_031850 /// NM_032049		AFFX-r2-Hs18SrRNA-5_at			---		---	---
210271_at	0.685229	1.37662	NEUROD2	2.00899	NM_006160		AFFX-r2-Hs18SrRNA-M_x_at			---		---	---
205832_at	0.707384	1.42102	CPA4	2.00884	NM_016352		AFFX-r2-Hs28SrRNA-3_at			---		---	---
218255_s_at	0.788074	1.58255	FBRS	2.00812	NM_001105079		AFFX-r2-Hs28SrRNA-M_at			---		---	---
Systematic	Normalized	Normalized			RefSeq Transcript ID		Probe Set ID

## Sheet: combo down 2
Treatment ()*	DMSO	Combo	Gene Symbol	fold change	RefSeq Transcript ID			Probe Set ID	Representative Public ID		Gene Title		Probe Set ID	Gene Symbol	Gene Title
209459_s_at	1.96963	0.112293	ABAT	17.5402	NM_000663			200005_at	AF237813		tubulin folding cofactor B		200005_at	EIF3D	eukaryotic translation initiation factor 3, subunit D
214331_at	1.75046	0.168978	TSFM	10.3591	NM_005726			200008_s_at	AI796813		vesicle transport through interaction with t-SNAREs homolog 1B (yeast)		200008_s_at	GDI2	GDP dissociation inhibitor 2
205071_x_at	1.51366	0.168468	XRCC4	8.98486	NM_003401			200028_s_at	AB017445		F-box and WD repeat domain containing 2		200028_s_at	STARD7	StAR-related lipid transfer (START) domain containing 7
204766_s_at	1.45647	0.163249	NUDT1	8.92176	NM_002452			200037_s_at	NM_002452		breast carcinoma amplified sequence 2		200037_s_at	CBX3 /// LOC653972	chromobox homolog 3 (HP1 gamma homolog, Drosophila) /// similar to chromobox homolog 3
206373_at	2.02967	0.24545	ZIC1	8.26918	NM_003412			200040_at	NM_003412		MLF1 interacting protein		200040_at	KHDRBS1	KH domain containing, RNA binding, signal transduction associated 1
205345_at	1.93032	0.234828	BARD1	8.22013	NM_000465			200071_at	NM_000465		EF-hand domain (C-terminal) containing 1		200071_at	SMNDC1	survival motor neuron domain containing 1
204695_at	2.10303	0.25663	CDC25A	8.19477	NM_001789			200653_s_at	AI343459		RNA binding motif protein 10		200653_s_at	CALM1 /// CALM2 /// CALM3	calmodulin 1 (phosphorylase kinase, delta) /// calmodulin 2 (phosphorylase kinase, delta) /// calmodulin 3 (phosphorylase kinase, delta)
220145_at	1.65453	0.204339	MAP9	8.09698	NM_001039580			200659_s_at	NM_024826		solute carrier family 35 (UDP-N-acetylglucosamine (UDP-GlcNAc) transporter), member A3		200659_s_at	PHB	prohibitin
205174_s_at	3.51475	0.446421	QPCT	7.87318	NM_012413			200662_s_at	NM_012413		solute carrier family 39 (zinc transporter), member 6		200662_s_at	TOMM20	translocase of outer mitochondrial membrane 20 homolog (yeast)
221777_at	1.88068	0.240373	C12orf52	7.82401	NM_032848			200679_x_at	BE966197		gem (nuclear organelle) associated protein 4		200679_x_at	HMGB1	high-mobility group box 1
219658_at	2.42788	0.33396	PTCD2	7.26997	NM_024754			200684_s_at	NM_024754		MYC binding protein 2		200684_s_at	UBE2L3	ubiquitin-conjugating enzyme E2L 3
203222_s_at	1.7049	0.249371	TLE1	6.83679	NM_005077			200702_s_at	NM_005077		deleted in liver cancer 1		200702_s_at	DDX24	DEAD (Asp-Glu-Ala-Asp) box polypeptide 24
210480_s_at	1.70926	0.265592	MYO6	6.43566	NM_004999			200740_s_at	U90236		butyrophilin, subfamily 3, member A3 /// butyrophilin, subfamily 3, member A2		200740_s_at	SUMO3	SMT3 suppressor of mif two 3 homolog 3 (S. cerevisiae)
221981_s_at	2.29369	0.383611	WDR59	5.97921	NM_030581			200790_at	AA702154		SAM and SH3 domain containing 1		200790_at	ODC1	ornithine decarboxylase 1
201330_at	3.17957	0.565042	RARS	5.62713	NM_002887			200810_s_at	NM_002887		EH-domain containing 1		200810_s_at	CIRBP	cold inducible RNA binding protein
214439_x_at	2.14144	0.413516	BIN1	5.1786	NM_004305			200811_at	AF043899		phosphatidic acid phosphatase type 2B		200811_at	CIRBP	cold inducible RNA binding protein
221251_x_at	1.88673	0.365743	WBP1 /// ZNHIT4	5.15861	NM_012477			200816_s_at	NM_031288		succinate dehydrogenase complex, subunit C, integral membrane protein, 15kDa /// hCG1776980		200816_s_at	PAFAH1B1	platelet-activating factor acetylhydrolase, isoform Ib, alpha subunit 45kDa
219049_at	2.27365	0.448782	CSGALNACT1	5.06625	NM_018371			200841_s_at	NM_018371		TAF5 RNA polymerase II, TATA box binding protein (TBP)-associated factor, 100kDa		200841_s_at	EPRS	glutamyl-prolyl-tRNA synthetase
213268_at	1.69183	0.334431	CAMTA1	5.05884	NM_015215			200887_s_at	Z98884		golgi apparatus protein 1		200887_s_at	STAT1	signal transducer and activator of transcription 1, 91kDa
210994_x_at	1.17789	0.233052	TRIM23	5.05419	NM_001656			200897_s_at	AF230398		histone cluster 2, H2aa3 /// histone cluster 2, H2aa4		200897_s_at	PALLD	palladin, cytoskeletal associated protein
203917_at	1.7291	0.344822	CXADR	5.01446	NM_001338			200906_s_at	NM_001338		adducin 3 (gamma)		200906_s_at	PALLD	palladin, cytoskeletal associated protein
205524_s_at	1.87243	0.374336	HAPLN1	5.002	NM_001884			200907_s_at	NM_001884		NEFA-interacting nuclear protein NIP30		200907_s_at	PALLD	palladin, cytoskeletal associated protein
221583_s_at	1.82776	0.36673	KCNMA1	4.98395	NM_001014797			200934_at	AI129381		NIMA (never in mitosis gene a)- related kinase 9		200934_at	DEK	DEK oncogene (DNA binding)
214492_at	2.57757	0.518295	SGCD	4.97317	NM_000337			200969_at	NM_000337		translocase of outer mitochondrial membrane 20 homolog (yeast)		200969_at	SERP1	stress-associated endoplasmic reticulum protein 1
202156_s_at	2.31753	0.466649	CUGBP2	4.96633	NM_001025076			200973_s_at	N36839		SET and MYND domain containing 2		200973_s_at	TSPAN3	tetraspanin 3
218832_x_at	1.713	0.348844	ARRB1	4.91051	NM_004041			200991_s_at	NM_004041		mitogen-activated protein kinase 3		200991_s_at	SNX17	sorting nexin 17
210073_at	1.88322	0.388137	ST8SIA1	4.85195	NM_003034			200993_at	L32867		phosphatidylinositol-3-phosphate/phosphatidylinositol 5-kinase, type III		200993_at	IPO7	importin 7
219209_at	1.75539	0.372666	IFIH1	4.71035	NM_022168			201013_s_at	NM_022168		zuotin related factor 1		201013_s_at	PAICS	phosphoribosylaminoimidazole carboxylase, phosphoribosylaminoimidazole succinocarboxamide synthetase
218747_s_at	1.68221	0.357974	TAPBPL	4.69924	NM_018009			201014_s_at	NM_018009		chromosome 17 open reading frame 48		201014_s_at	PAICS	phosphoribosylaminoimidazole carboxylase, phosphoribosylaminoimidazole succinocarboxamide synthetase
209031_at	1.98917	0.423481	CADM1	4.69718	NM_001098517			201039_s_at	AL519710		replication factor C (activator 1) 1, 145kDa		201039_s_at	RAD23A	RAD23 homolog A (S. cerevisiae)
209167_at	1.95757	0.418763	GPM6B	4.67464	NM_001001994			201067_at	AI419030		inhibitor of growth family, member 1		201067_at	PSMC2	proteasome (prosome, macropain) 26S subunit, ATPase, 2
205227_at	2.62581	0.565229	IL1RAP	4.64558	NM_002182			201093_x_at	NM_002182		nudix (nucleoside diphosphate linked moiety X)-type motif 21		201093_x_at	SDHA	succinate dehydrogenase complex, subunit A, flavoprotein (Fp)
202903_at	2.13131	0.458784	LSM5	4.64556	NM_012322			201111_at	AU153477		cullin 5		201111_at	CSE1L	CSE1 chromosome segregation 1-like (yeast)
205031_at	1.30773	0.285044	EFNB3	4.58781	NM_001406			201112_s_at	NM_001406		C-terminal binding protein 2		201112_s_at	CSE1L	CSE1 chromosome segregation 1-like (yeast)
221584_s_at	1.67544	0.365475	KCNMA1	4.58428	NM_001014797			201114_x_at	U11058		mitogen-activated protein kinase 1 interacting protein 1-like		201114_x_at	PSMA7	proteasome (prosome, macropain) subunit, alpha type, 7
203708_at	1.50641	0.332751	PDE4B	4.52713	NM_001037339			201120_s_at	NM_002600		mitochondrial ribosomal protein S18B		201120_s_at	PGRMC1	progesterone receptor membrane component 1
201067_at	1.68452	0.373354	PSMC2	4.51185	NM_002803			201129_at	BF215487		mitogen-activated protein kinase kinase 5		201129_at	SFRS7	splicing factor, arginine/serine-rich 7, 35kDa
200907_s_at	2.26539	0.503795	PALLD	4.49666	NM_016081			201164_s_at	AU157932		ubiquitin specific peptidase 1		201164_s_at	PUM1	pumilio homolog 1 (Drosophila)
214451_at	2.04378	0.45633	TFAP2B	4.47874	NM_003221			201175_at	NM_003221		ataxia telangiectasia and Rad3 related		201175_at	TXNDC14	thioredoxin domain containing 14
207232_s_at	1.26332	0.283686	DZIP3	4.45322	NM_014648			201185_at	NM_014648		RNA binding motif protein 15		201185_at	HTRA1	HtrA serine peptidase 1
205928_at	1.6054	0.363445	ZNF443	4.41717	NM_005815			201186_at	NM_005815		integrator complex subunit 7		201186_at	LRPAP1	low density lipoprotein receptor-related protein associated protein 1
221270_s_at	1.54216	0.352574	QTRT1	4.374	NM_031209			201202_at	NM_031209		ring finger protein 113A		201202_at	PCNA	proliferating cell nuclear antigen
205961_s_at	1.57865	0.362441	PSIP1	4.35559	NM_021144			201215_at	NM_004682		transmembrane protein 50A		201215_at	PLS3	plastin 3 (T isoform)
219686_at	1.85183	0.429248	STK32B	4.31413	NM_018401			201218_at	NM_018401		GDP dissociation inhibitor 2		201218_at	CTBP2	C-terminal binding protein 2
215616_s_at	1.54737	0.358906	JMJD2B	4.31134	NM_015015			201240_s_at	AB020683		NADH dehydrogenase (ubiquinone) Fe-S protein 3, 30kDa (NADH-coenzyme Q reductase)		201240_s_at	SPCS2	signal peptidase complex subunit 2 homolog (S. cerevisiae)
203895_at	1.62956	0.378328	PLCB4	4.30727	NM_000933			201242_s_at	AL535113		dom-3 homolog Z (C. elegans)		201242_s_at	ATP1B1	ATPase, Na+/K+ transporting, beta 1 polypeptide
211571_s_at	1.5195	0.364592	VCAN	4.16766	NM_001126336			201267_s_at	D32039		chromatin modifying protein 4A		201267_s_at	PSMC3	proteasome (prosome, macropain) 26S subunit, ATPase, 3
206544_x_at	1.37223	0.339055	SMARCA2	4.04721	NM_003070			201277_s_at	NM_003070		nucleoporin 98kDa		201277_s_at	HNRNPAB	heterogeneous nuclear ribonucleoprotein A/B
220425_x_at	1.82533	0.453369	ROPN1 /// ROPN1B	4.02614	NM_001012337			201291_s_at	NM_017578		cortactin		201291_s_at	TOP2A	topoisomerase (DNA) II alpha 170kDa
218858_at	2.00796	0.502757	DEPDC6	3.99389	NM_022783			201302_at	NM_022783		LMBR1 domain containing 1		201302_at	ANXA4	annexin A4
209790_s_at	1.65142	0.414378	CASP6	3.98529	NM_001226			201306_s_at	BC000305		nucleoredoxin		201306_s_at	ANP32B	acidic (leucine-rich) nuclear phosphoprotein 32 family, member B
202157_s_at	2.21672	0.5576	CUGBP2	3.97547	NM_001025076			201316_at	U69546		fasciculation and elongation protein zeta 2 (zygin II)		201316_at	PSMA2	proteasome (prosome, macropain) subunit, alpha type, 2
214358_at	1.26347	0.318838	ACACA	3.96272	NM_198834			201326_at	AW188201		splicing factor, arginine/serine-rich 1 (splicing factor 2, alternate splicing factor)		201326_at	CCT6A	chaperonin containing TCP1, subunit 6A (zeta 1)
203495_at	1.51158	0.384907	LRRC14	3.92713	NM_014665			201330_at	NM_014665		thromboxane A synthase 1 (platelet, cytochrome P450, family 5, subfamily A)		201330_at	RARS	arginyl-tRNA synthetase
203532_x_at	2.46909	0.634478	CUL5	3.89153	NM_003478			201345_s_at	AF017061		transmembrane protein 5		201345_s_at	UBE2D2	ubiquitin-conjugating enzyme E2D 2 (UBC4/5 homolog, yeast)
201961_s_at	1.7095	0.439482	RNF41	3.8898	NM_005785			201362_at	AL583171		cyclin-dependent kinase inhibitor 3 (CDK2-associated dual specificity phosphatase)		201362_at	IVNS1ABP	influenza virus NS1A binding protein
215120_s_at	1.19187	0.306449	SAMD4A	3.88928	NM_015589			201363_s_at	BF697247		kelch domain containing 3		201363_s_at	IVNS1ABP	influenza virus NS1A binding protein
204274_at	1.73203	0.448332	EBAG9	3.86328	NM_004215			201377_at	AA812215		RAB2A, member RAS oncogene family		201377_at	UBAP2L	ubiquitin associated protein 2-like
204932_at	2.11952	0.548906	TNFRSF11B	3.86136	NM_002546			201391_at	BF433902		golgi apparatus protein 1		201391_at	TRAP1	TNF receptor-associated protein 1
201242_s_at	1.82798	0.474902	ATP1B1	3.84918	NM_001001787			201397_at	BC000006		integrator complex subunit 12		201397_at	PHGDH	phosphoglycerate dehydrogenase
201890_at	1.8172	0.477591	RRM2	3.80493	NM_001034			201415_at	BE966236		ornithine aminotransferase (gyrate atrophy)		201415_at	GSS	glutathione synthetase
203103_s_at	1.61695	0.428585	PRPF19	3.77278	NM_014502			201417_at	NM_014502		hexosaminidase A (alpha polypeptide)		201417_at	SOX4	SRY (sex determining region Y)-box 4
209170_s_at	1.77467	0.473533	GPM6B	3.74773	NM_001001994			201440_at	AF016004		cleavage stimulation factor, 3' pre-RNA, subunit 2, 64kDa, tau variant		201440_at	DDX23	DEAD (Asp-Glu-Ala-Asp) box polypeptide 23
209337_at	1.59794	0.426692	PSIP1	3.74496	NM_021144			201445_at	AF063020		phosphatidylinositol binding clathrin assembly protein		201445_at	CNN3	calponin 3, acidic
216228_s_at	1.41424	0.379799	WDHD1	3.72366	NM_001008396			201456_s_at	AK001538		G-2 and S-phase expressed 1		201456_s_at	BUB3	BUB3 budding uninhibited by benzimidazoles 3 homolog (yeast)
221951_at	1.36945	0.368381	TMEM80	3.71748	NM_001042463			201458_s_at	AI739035		ubiquitin carboxyl-terminal hydrolase L5		201458_s_at	BUB3	BUB3 budding uninhibited by benzimidazoles 3 homolog (yeast)
207198_s_at	1.5556	0.418493	LIMS1	3.71714	NM_004987			201459_at	NM_004987		BCL2/adenovirus E1B 19kDa interacting protein 1		201459_at	RUVBL2	RuvB-like 2 (E. coli)
212675_s_at	1.64931	0.444251	CEP68	3.71258	NM_015147			201472_at	AB011154		zinc metallopeptidase (STE24 homolog, S. cerevisiae)		201472_at	VBP1	von Hippel-Lindau binding protein 1
206081_at	1.42626	0.384473	SLC24A1	3.70965	NM_004727			201476_s_at	NM_004727		WD repeat domain 32		201476_s_at	RRM1	ribonucleotide reductase M1
206685_at	1.22366	0.32995	HCG4	3.70863	NR_002139			201477_s_at	NM_018985		acyl-CoA synthetase short-chain family member 3		201477_s_at	RRM1	ribonucleotide reductase M1
48808_at	2.55234	0.69061	DHFR	3.69577	NM_000791			201502_s_at	AI144299		polo-like kinase 1 (Drosophila)		201502_s_at	NFKBIA	nuclear factor of kappa light polypeptide gene enhancer in B-cells inhibitor, alpha
201440_at	1.23809	0.335435	DDX23	3.69101	NM_004818			201504_s_at	NM_004818		calcium modulating ligand		201504_s_at	TSN	translin
209773_s_at	1.58196	0.428979	RRM2	3.68774	NM_001034			201512_s_at	BC001886		tripeptidyl peptidase II		201512_s_at	TOMM70A	translocase of outer mitochondrial membrane 70 homolog A (S. cerevisiae)
204126_s_at	1.86702	0.506667	CDC45L	3.6849	NM_003504			201515_s_at	NM_003504		proteasome (prosome, macropain) 26S subunit, non-ATPase, 4		201515_s_at	TSN	translin
203548_s_at	1.64155	0.445725	LPL	3.68286	NM_000237			201528_at	BF672975		ubiquitin-conjugating enzyme E2L 3		201528_at	RPA1	replication protein A1, 70kDa
209715_at	1.75089	0.47572	CBX5	3.68049	NM_012117			201534_s_at	L07515		mediator complex subunit 6		201534_s_at	UBL3	ubiquitin-like 3
212677_s_at	1.85698	0.506409	CEP68	3.66696	NM_015147			201569_s_at	BG530481		TEA domain family member 4		201569_s_at	LOC100131861 /// SAMM50	sorting and assembly machinery component 50 homolog (S. cerevisiae) /// hypothetical protein LOC100131861
214500_at	1.52957	0.418445	H2AFY	3.65536	NM_001040158			201578_at	AF044286		structural maintenance of chromosomes 4		201578_at	PODXL	podocalyxin-like
205376_at	1.77414	0.485369	INPP4B	3.65525	NM_001101669			201581_at	NM_003866		eukaryotic translation initiation factor 3, subunit D		201581_at	TXNDC13	thioredoxin domain containing 13
209055_s_at	1.70472	0.466704	CDC5L	3.65268	NM_001253			201593_s_at	AW268817		protein phosphatase 1, regulatory (inhibitor) subunit 12A		201593_s_at	ZC3H15	zinc finger CCCH-type containing 15
203496_s_at	1.08978	0.300965	MED1	3.62096	NM_004774			201599_at	AF055994		lysophosphatidylglycerol acyltransferase 1		201599_at	OAT	ornithine aminotransferase (gyrate atrophy)
217853_at	1.43511	0.397343	TNS3	3.61177	NM_022748			201602_s_at	NM_022748		embryonic ectoderm development		201602_s_at	PPP1R12A	protein phosphatase 1, regulatory (inhibitor) subunit 12A
218796_at	1.56565	0.434577	FERMT1	3.6027	NM_017671			201614_s_at	NM_017671		peptidylprolyl isomerase domain and WD repeat containing 1		201614_s_at	RUVBL1	RuvB-like 1 (E. coli)
201578_at	1.91509	0.531859	PODXL	3.60075	NM_001018111			201635_s_at	NM_005397		tankyrase, TRF1-interacting ankyrin-related ADP-ribose polymerase 2		201635_s_at	FXR1	fragile X mental retardation, autosomal homolog 1
209932_s_at	1.66449	0.463575	DUT	3.59055	NM_001025248			201645_at	U90223		hypothetical protein FLJ11822		201645_at	TNC	tenascin C (hexabrachion)
204146_at	1.63185	0.456354	RAD51AP1	3.57585	NM_006479			201647_s_at	BE966146		CKLF-like MARVEL transmembrane domain containing 6		201647_s_at	SCARB2	scavenger receptor class B, member 2
210997_at	1.4524	0.406322	HGF	3.5745	NM_000601			201664_at	M77227		chaperonin containing TCP1, subunit 2 (beta)		201664_at	SMC4	structural maintenance of chromosomes 4
204026_s_at	1.78716	0.502539	ZWINT	3.55627	NM_001005413			201671_x_at	NM_007057		kinesin-associated protein 3		201671_x_at	USP14	ubiquitin specific peptidase 14 (tRNA-guanine transglycosylase)
204633_s_at	1.79219	0.50409	RPS6KA5	3.55529	NM_004755			201674_s_at	AF074393		aspartate beta-hydroxylase		201674_s_at	AKAP1	A kinase (PRKA) anchor protein 1
219493_at	1.85746	0.524247	SHCBP1	3.5431	NM_024745			201682_at	NM_024745		gephyrin		201682_at	PMPCB	peptidase (mitochondrial processing) beta
220038_at	1.71708	0.486594	C8orf44 /// SGK3	3.52878	NM_001033578			201714_at	NM_013257		pituitary tumor-transforming 1		201714_at	TUBG1	tubulin, gamma 1
201645_at	1.75767	0.498442	TNC	3.52632	NM_002160			201722_s_at	NM_002160		DnaJ (Hsp40) homolog, subfamily C, member 15		201722_s_at	GALNT1	UDP-N-acetyl-alpha-D-galactosamine:polypeptide N-acetylgalactosaminyltransferase 1 (GalNAc-T1)
202158_s_at	2.19673	0.625066	CUGBP2	3.51441	NM_001025076			201737_s_at	NM_006561		coilin		201737_s_at	2008-03-06	membrane-associated ring finger (C3HC4) 6
220744_s_at	1.30999	0.373437	IFT122	3.50792	NM_018262			201739_at	NM_018262		FYN oncogene related to SRC, FGR, YES		201739_at	SGK1	serum/glucocorticoid regulated kinase 1
213474_at	1.38971	0.397501	---	3.49611	---			201740_at	AI890903		ubiquitin specific peptidase 39		201740_at	NDUFS3	NADH dehydrogenase (ubiquinone) Fe-S protein 3, 30kDa (NADH-coenzyme Q reductase)
201397_at	1.72856	0.494561	PHGDH	3.49514	NM_006623			201753_s_at	NM_006623		exosome component 4		201753_s_at	ADD3	adducin 3 (gamma)
207405_s_at	1.32625	0.381438	RAD17	3.47698	NM_002873			201755_at	NM_002873		COP9 constitutive photomorphogenic homolog subunit 2 (Arabidopsis)		201755_at	MCM5	minichromosome maintenance complex component 5
219000_s_at	1.93872	0.558735	DSCC1	3.46984	NM_024094			201756_at	NM_024094		synaptic vesicle glycoprotein 2A		201756_at	RPA2	replication protein A2, 32kDa
204300_at	1.75624	0.508336	PET112L	3.45488	NM_004564			201761_at	NM_004564		succinate dehydrogenase complex, subunit C, integral membrane protein, 15kDa		201761_at	MTHFD2	methylenetetrahydrofolate dehydrogenase (NADP+ dependent) 2, methenyltetrahydrofolate cyclohydrolase
215646_s_at	1.81576	0.52737	VCAN	3.44304	NM_001126336			201764_at	R94644		chromosome 20 open reading frame 19		201764_at	TMEM106C	transmembrane protein 106C
201753_s_at	1.54419	0.451435	ADD3	3.42063	NM_001121			201765_s_at	NM_019903		kinesin family member 2C		201765_s_at	HEXA	hexosaminidase A (alpha polypeptide)
203856_at	1.75252	0.512534	VRK1	3.41933	NM_003384			201769_at	NM_003384		low density lipoprotein receptor-related protein associated protein 1		201769_at	CLINT1	clathrin interactor 1
201362_at	1.41751	0.416515	IVNS1ABP	3.40326	NM_006469			201770_at	AF205218		antigen p97 (melanoma associated) identified by monoclonal antibodies 133.2 and 96.5		201770_at	SNRPA	small nuclear ribonucleoprotein polypeptide A
218741_at	1.71713	0.504655	CENPM	3.40258	NM_001002876			201774_s_at	NM_024053		PRP4 pre-mRNA processing factor 4 homolog (yeast)		201774_s_at	NCAPD2	non-SMC condensin I complex, subunit D2
205498_at	1.56406	0.459916	GHR	3.40076	NM_000163			201779_s_at	NM_000163		membrane protein, palmitoylated 5 (MAGUK p55 subfamily member 5)		201779_s_at	RNF13	ring finger protein 13
200897_s_at	1.62294	0.480014	PALLD	3.38103	NM_016081			201801_s_at	NM_016081		kinetochore associated 1		201801_s_at	SLC29A1	solute carrier family 29 (nucleoside transporters), member 1
201801_s_at	2.00002	0.593605	SLC29A1	3.36928	NM_001078174			201804_x_at	AF079117		centrosomal protein 57kDa		201804_x_at	TBCB	tubulin folding cofactor B
207199_at	1.21823	0.362262	TERT	3.36284	NM_198253			201807_at	NM_003219		trafficking protein particle complex 2-like		201807_at	VPS26A	vacuolar protein sorting 26 homolog A (S. pombe)
218349_s_at	1.46819	0.436863	ZWILCH	3.36075	NM_017975			201813_s_at	NM_017975		PRP6 pre-mRNA processing factor 6 homolog (S. cerevisiae)		201813_s_at	TBC1D5	TBC1 domain family, member 5
209053_s_at	1.28869	0.383874	WHSC1	3.35705	NM_001042424			201827_at	BE793789		transcription elongation factor A (SII), 1		201827_at	SMARCD2	SWI/SNF related, matrix associated, actin dependent regulator of chromatin, subfamily d, member 2
206809_s_at	1.5586	0.46441	HNRNPA3 /// HNRNPA3P1	3.35608	NM_194247			201830_s_at	NM_005758		protein phosphatase 1B (formerly 2C), magnesium-dependent, beta isoform		201830_s_at	NET1	neuroepithelial cell transforming gene 1
218585_s_at	1.72491	0.514118	DTL	3.35508	NM_016448			201849_at	NM_016448		clathrin interactor 1		201849_at	BNIP3	BCL2/adenovirus E1B 19kDa interacting protein 3
205168_at	1.68482	0.502268	DDR2	3.35443	NM_001014796			201855_s_at	NM_006182		transcription factor Dp-2 (E2F dimerization partner 2)		201855_s_at	ATMIN	ATM interactor
204827_s_at	1.50103	0.447727	CCNF	3.35256	NM_001761			201890_at	U17105		sorting nexin 17		201890_at	RRM2	ribonucleotide reductase M2 polypeptide
209431_s_at	1.56262	0.466196	PATZ1	3.35185	NM_014323			201901_s_at	AF254083		AT rich interactive domain 1A (SWI-like)		201901_s_at	YY1	YY1 transcription factor
219703_at	1.84748	0.551708	MNS1	3.34865	NM_018365			201928_at	NM_018365		similar to hCG1774568		201928_at	PKP4	plakophilin 4
203270_at	1.5565	0.465626	DTYMK /// LOC727761	3.34281	NM_012145			201929_s_at	NM_012145		B9 protein domain 1		201929_s_at	PKP4	plakophilin 4
205097_at	1.49742	0.448614	SLC26A2	3.33787	NM_000112			201946_s_at	AI025519		tetratricopeptide repeat domain 3		201946_s_at	CCT2	chaperonin containing TCP1, subunit 2 (beta)
204566_at	1.36247	0.408684	PPM1D	3.3338	NM_003620			201959_s_at	NM_003620		chromosome 14 open reading frame 108		201959_s_at	MYCBP2	MYC binding protein 2
201291_s_at	1.67223	0.501905	TOP2A	3.33176	NM_001067			201961_s_at	AU159942		synaptotagmin binding, cytoplasmic RNA interacting protein		201961_s_at	RNF41	ring finger protein 41
210233_at	1.82248	0.54873	IL1RAP	3.32127	NM_002182			201970_s_at	AF167343		H2A histone family, member V		201970_s_at	NASP	nuclear autoantigenic sperm protein (histone-binding)
204775_at	1.49191	0.44932	CHAF1B	3.32038	NM_005441			201983_s_at	NM_005441		Sjogren syndrome/scleroderma autoantigen 1		201983_s_at	EGFR	epidermal growth factor receptor (erythroblastic leukemia viral (v-erb-b) oncogene homolog, avian)
221558_s_at	1.85358	0.559102	LEF1	3.31528	NM_016269			201998_at	AF288571		syntaxin 16		201998_at	ST6GAL1	ST6 beta-galactosamide alpha-2,6-sialyltranferase 1
214321_at	2.05407	0.620088	NOV	3.31255	NM_002514			202004_x_at	BF440025		solute carrier family 7, (cationic amino acid transporter, y+ system) member 11		202004_x_at	SDHC	succinate dehydrogenase complex, subunit C, integral membrane protein, 15kDa
212533_at	1.52447	0.460263	WEE1	3.31217	NM_003390			202020_s_at	X62048		COMM domain containing 8		202020_s_at	LANCL1	LanC lantibiotic synthetase component C-like 1 (bacterial)
218988_at	1.57289	0.476106	SLC35E3	3.30366	NM_018656			202052_s_at	NM_018656		kinesin heavy chain member 2A		202052_s_at	RAI14	retinoic acid induced 14
206102_at	1.62544	0.493131	GINS1	3.29617	NM_021067			202088_at	NM_021067		programmed cell death 4 (neoplastic transformation inhibitor)		202088_at	SLC39A6	solute carrier family 39 (zinc transporter), member 6
222305_at	1.61165	0.489136	HK2	3.29489	NM_000189			202095_s_at	AW975638		lactamase, beta 2		202095_s_at	BIRC5	baculoviral IAP repeat-containing 5 (survivin)
206167_s_at	1.7622	0.534885	ARHGAP6	3.29453	NM_001174			202107_s_at	NM_001174		additional sex combs like 2 (Drosophila)		202107_s_at	MCM2	minichromosome maintenance complex component 2
217945_at	1.42287	0.432652	BTBD1	3.28871	NM_001011885			202149_at	NM_025238		F-box protein 21		202149_at	NEDD9	neural precursor cell expressed, developmentally down-regulated 9
209040_s_at	1.678	0.510968	PSMB8	3.28396	NM_004159			202153_s_at	U17496		protein regulator of cytokinesis 1		202153_s_at	NUP62	nucleoporin 62kDa
204238_s_at	1.51355	0.46099	C6orf108	3.28325	NM_006443			202156_s_at	NM_006443		calcyclin binding protein		202156_s_at	CUGBP2	CUG triplet repeat, RNA binding protein 2
212560_at	1.5854	0.48356	SORL1	3.27859	NM_003105			202157_s_at	AV728268		RuvB-like 2 (E. coli)		202157_s_at	CUGBP2	CUG triplet repeat, RNA binding protein 2
204285_s_at	1.53059	0.467222	PMAIP1	3.27594	NM_021127			202158_s_at	AI857639		UBX domain containing 2		202158_s_at	CUGBP2	CUG triplet repeat, RNA binding protein 2
203243_s_at	1.8955	0.57963	PDLIM5	3.27018	NM_001011513			202169_s_at	NM_006457		centrosomal protein 57kDa		202169_s_at	AASDHPPT	aminoadipate-semialdehyde dehydrogenase-phosphopantetheinyl transferase
205047_s_at	1.59665	0.490111	ASNS	3.25774	NM_001673			202173_s_at	NM_001673		anaphase promoting complex subunit 1		202173_s_at	VEZF1	vascular endothelial zinc finger 1
218559_s_at	1.67166	0.517521	MAFB	3.23014	NM_005461			202184_s_at	NM_005461		tetratricopeptide repeat domain 27		202184_s_at	NUP133	nucleoporin 133kDa
206201_s_at	2.10112	0.650962	MEOX2	3.22772	NM_005924			202188_at	NM_005924		SWAP-70 protein		202188_at	NUP93	nucleoporin 93kDa
211615_s_at	1.42332	0.443012	LRPPRC	3.21282	NM_133259			202191_s_at	M92439		propionyl Coenzyme A carboxylase, beta polypeptide		202191_s_at	GAS7	growth arrest-specific 7
201534_s_at	1.74934	0.546286	UBL3	3.20223	NM_007106			202209_at	AF044221		v-Ki-ras2 Kirsten rat sarcoma viral oncogene homolog		202209_at	LSM3	LSM3 homolog, U6 small nuclear RNA associated (S. cerevisiae)
202743_at	1.68712	0.528382	PIK3R3	3.19299	NM_001114172			202214_s_at	BE622627		neural precursor cell expressed, developmentally down-regulated 9		202214_s_at	CUL4B	cullin 4B
204798_at	1.34921	0.422656	MYB	3.19221	NM_005375			202240_at	NM_005375		high-mobility group box 1		202240_at	PLK1	polo-like kinase 1 (Drosophila)
219306_at	1.6495	0.517177	KIF15	3.18944	NM_020242			202246_s_at	NM_020242		multiple PDZ domain protein		202246_s_at	CDK4	cyclin-dependent kinase 4
211713_x_at	1.67625	0.525826	KIAA0101	3.18783	NM_001029989			202266_at	BC005832		StAR-related lipid transfer (START) domain containing 7		202266_at	TTRAP	TRAF and TNF receptor associated protein
210093_s_at	1.54208	0.484685	MAGOH	3.18161	NM_002370			202276_at	AF067173		high-mobility group protein 2-like 1		202276_at	SHFM1	split hand/foot malformation (ectrodactyly) type 1
213718_at	1.27022	0.401632	RBM4	3.16265	NM_002896			202309_at	BE222257		mitochondrial GTPase 1 homolog (S. cerevisiae)		202309_at	MTHFD1	methylenetetrahydrofolate dehydrogenase (NADP+ dependent) 1, methenyltetrahydrofolate cyclohydrolase, formyltetrahydrofolate synthetase
203537_at	1.73316	0.548571	PRPSAP2	3.15941	NM_002767			202330_s_at	NM_002767		solute carrier family 35 (CMP-sialic acid transporter), member A1		202330_s_at	UNG	uracil-DNA glycosylase
219565_at	1.6275	0.515274	CYP20A1	3.15852	NM_177538			202336_s_at	NM_020674		cullin-associated and neddylation-dissociated 1		202336_s_at	PAM	peptidylglycine alpha-amidating monooxygenase
213322_at	1.6079	0.509323	C6orf130	3.15694	NM_145063			202345_s_at	AL031778		deoxyhypusine synthase		202345_s_at	FABP5 /// FABP5L2 /// FABP5L7	fatty acid binding protein 5 (psoriasis-associated) /// fatty acid binding protein 5-like 7 /// fatty acid binding protein 5-like 2
203963_at	1.59783	0.50806	CA12	3.14497	NM_001218			202364_at	NM_001218		integrator complex subunit 8		202364_at	MXI1	MAX interactor 1
221727_at	1.44096	0.458695	SUB1	3.14143	NM_006713			202370_s_at	AA456973		nucleolar protein 11		202370_s_at	CBFB	core-binding factor, beta subunit
219242_at	1.4982	0.477435	CEP63	3.13801	NM_001042383			202371_at	NM_025180		RNA binding motif protein 22		202371_at	TCEAL4	transcription elongation factor A (SII)-like 4
212855_at	1.27186	0.405746	DCUN1D4	3.13463	NM_001040402			202378_s_at	D87466		lysine-rich coiled-coil 1		202378_s_at	LEPROT	leptin receptor overlapping transcript
212279_at	1.49332	0.477066	TMEM97	3.13022	NM_014573			202405_at	BE779865		acetyl-Coenzyme A acetyltransferase 1 (acetoacetyl Coenzyme A thiolase)		202405_at	TIAL1	TIA1 cytotoxic granule-associated RNA binding protein-like 1
205053_at	1.70157	0.544499	PRIM1	3.12502	NM_000946			202412_s_at	NM_000946		NGFI-A binding protein 1 (EGR1 binding protein 1)		202412_s_at	USP1	ubiquitin specific peptidase 1
201635_s_at	1.62661	0.520543	FXR1	3.12484	NM_001013438			202413_s_at	AI990766		sphingomyelin phosphodiesterase, acid-like 3A		202413_s_at	USP1	ubiquitin specific peptidase 1
203690_at	1.33598	0.427759	TUBGCP3	3.1232	NM_006322			202429_s_at	NM_006322		TTK protein kinase		202429_s_at	PPP3CA	protein phosphatase 3 (formerly 2B), catalytic subunit, alpha isoform
209425_at	1.88314	0.603745	AMACR /// C1QTNF3	3.1191	NM_014324			202451_at	AA888589		CCR4-NOT transcription complex, subunit 4		202451_at	GTF2H1	general transcription factor IIH, polypeptide 1, 62kDa
219743_at	1.89897	0.610131	HEY2	3.11241	NM_012259			202467_s_at	NM_012259		chromosome 18 open reading frame 24		202467_s_at	COPS2	COP9 constitutive photomorphogenic homolog subunit 2 (Arabidopsis)
218628_at	1.43585	0.462185	CCDC53	3.10666	NM_016053			202470_s_at	NM_016053		acetylserotonin O-methyltransferase-like		202470_s_at	CPSF6	cleavage and polyadenylation specific factor 6, 68kDa
206071_s_at	1.58494	0.510708	EPHA3	3.10342	NM_005233			202503_s_at	NM_005233		cyclin-dependent kinase 4		202503_s_at	KIAA0101	KIAA0101
212158_at	1.60846	0.518572	SDC2	3.10171	NM_002998			202506_at	AL577322		TPX2, microtubule-associated, homolog (Xenopus laevis)		202506_at	SSFA2	sperm specific antigen 2
202020_s_at	1.47886	0.477055	LANCL1	3.09998	NM_006055			202514_at	NM_006055		zinc finger CCCH-type containing 13		202514_at	DLG1	discs, large homolog 1 (Drosophila)
212282_at	1.52566	0.492694	TMEM97	3.09657	NM_014573			202533_s_at	BF038366		ELOVL family member 6, elongation of long chain fatty acids (FEN1/Elo2, SUR4/Elo3-like, yeast)		202533_s_at	DHFR	dihydrofolate reductase
211566_x_at	1.48642	0.480312	BRE	3.09469	NM_004899			202534_x_at	U19178		structural maintenance of chromosomes 2		202534_x_at	DHFR	dihydrofolate reductase
212645_x_at	1.58392	0.511836	BRE	3.09459	NM_004899			202562_s_at	AL566299		fukutin		202562_s_at	C14orf1	chromosome 14 open reading frame 1
220319_s_at	1.55187	0.50155	MYLIP	3.09414	NM_013262			202567_at	NM_013262		Holliday junction recognition protein		202567_at	SNRPD3	small nuclear ribonucleoprotein D3 polypeptide 18kDa
201779_s_at	1.56659	0.50652	RNF13	3.09285	NM_007282			202580_x_at	AF070558		vacuolar protein sorting 26 homolog A (S. pombe)		202580_x_at	FOXM1	forkhead box M1
204441_s_at	1.69318	0.547813	POLA2	3.0908	NM_002689			202614_at	NM_002689		phosphoribosylaminoimidazole carboxylase, phosphoribosylaminoimidazole succinocarboxamide synthetase		202614_at	SLC30A9	solute carrier family 30 (zinc transporter), member 9
203968_s_at	1.7812	0.576676	CDC6	3.08874	NM_001254			202620_s_at	NM_001254		fatty acid binding protein 7, brain		202620_s_at	PLOD2	procollagen-lysine, 2-oxoglutarate 5-dioxygenase 2
215691_x_at	2.2883	0.741709	C1orf41	3.08517	NM_016126			202633_at	AV702994		GPN-loop GTPase 1		202633_at	TOPBP1	topoisomerase (DNA) II binding protein 1
208795_s_at	1.61355	0.523098	MCM7	3.0846	NM_005916			202642_s_at	D55716		EP300 interacting inhibitor of differentiation 1		202642_s_at	TRRAP	transformation/transcription domain-associated protein
207124_s_at	1.45484	0.473284	GNB5	3.07393	NM_006578			202651_at	NM_006578		cyclin-dependent kinase 8		202651_at	LPGAT1	lysophosphatidylglycerol acyltransferase 1
202534_x_at	2.05411	0.668616	DHFR	3.07219	NM_000791			202697_at	NM_000791		non-metastatic cells 7, protein expressed in (nucleoside-diphosphate kinase)		202697_at	NUDT21	nudix (nucleoside diphosphate linked moiety X)-type motif 21
222288_at	1.9644	0.640451	---	3.06721	---			202730_s_at	AI004009		CDC5 cell division cycle 5-like (S. pombe)		202730_s_at	PDCD4	programmed cell death 4 (neoplastic transformation inhibitor)
221958_s_at	1.58518	0.517025	GPR177	3.06597	NM_001002292			202736_s_at	AA775681		glucosidase, beta; acid (includes glucosylceramidase) /// glucosidase, beta; acid, pseudogene		202736_s_at	LSM4	LSM4 homolog, U6 small nuclear RNA associated (S. cerevisiae)
207831_x_at	1.57205	0.513017	DHPS	3.06433	NM_001930			202737_s_at	NM_013407		nuclear receptor subfamily 3, group C, member 1 (glucocorticoid receptor)		202737_s_at	LSM4	LSM4 homolog, U6 small nuclear RNA associated (S. cerevisiae)
201682_at	1.35544	0.442653	PMPCB	3.06208	NM_004279			202743_at	NM_004279		solute carrier family 25 (mitochondrial carrier; ornithine transporter) member 15		202743_at	PIK3R3	phosphoinositide-3-kinase, regulatory subunit 3 (gamma)
203789_s_at	1.91378	0.625018	SEMA3C	3.06195	NM_006379			202797_at	NM_006379		phospholipase C, beta 1 (phosphoinositide-specific)		202797_at	SACM1L	SAC1 suppressor of actin mutations 1-like (yeast)
216237_s_at	1.89652	0.6206	MCM5	3.05594	NM_006739			202813_at	AA807529		methylmalonyl Coenzyme A mutase		202813_at	TARBP1	TAR (HIV-1) RNA binding protein 1
205681_at	1.86868	0.613143	BCL2A1	3.04771	NM_001114735			202846_s_at	NM_004049		heme binding protein 1		202846_s_at	PIGC	phosphatidylinositol glycan anchor biosynthesis, class C
215785_s_at	1.47816	0.485362	CYFIP2	3.04549	NM_001037332			202850_at	AL161999		homeobox B7		202850_at	ABCD3	ATP-binding cassette, sub-family D (ALD), member 3
219525_at	1.49317	0.490384	SLC47A1	3.04489	NM_018242			202903_at	NM_018242		chloride channel, nucleotide-sensitive, 1A		202903_at	LSM5	LSM5 homolog, U6 small nuclear RNA associated (S. cerevisiae)
204620_s_at	1.63978	0.538949	VCAN	3.04254	NM_001126336			202909_at	NM_004385		calmodulin 1 (phosphorylase kinase, delta) /// calmodulin 2 (phosphorylase kinase, delta) /// calmodulin 3 (phosphorylase kinase, delta)		202909_at	EPM2AIP1	EPM2A (laforin) interacting protein 1
208079_s_at	1.60387	0.528179	AURKA	3.0366	NM_003600			202932_at	NM_003158		neuropilin (NRP) and tolloid (TLL)-like 2		202932_at	YES1	v-yes-1 Yamaguchi sarcoma viral oncogene homolog 1
205407_at	1.41651	0.467089	RECK	3.03264	NM_021111			202939_at	NM_021111		suppressor of zeste 12 homolog (Drosophila) /// suppressor of zeste 12 homolog pseudogene		202939_at	ZMPSTE24	zinc metallopeptidase (STE24 homolog, S. cerevisiae)
203102_s_at	1.54322	0.509145	MGAT2	3.03101	NM_002408			202942_at	NM_002408		nuclear cap binding protein subunit 1, 80kDa		202942_at	ETFB	electron-transfer-flavoprotein, beta polypeptide
203625_x_at	1.51352	0.500299	SKP2	3.02524	NM_005983			202944_at	BG105365		retinol dehydrogenase 14 (all-trans/9-cis/11-cis) /// 5'-nucleotidase, cytosolic IB		202944_at	NAGA	N-acetylgalactosaminidase, alpha-
202850_at	1.18757	0.393151	ABCD3	3.02065	NM_001122674			202959_at	NM_002858		Smith-Magenis syndrome chromosome region, candidate 7-like		202959_at	MUT	methylmalonyl Coenzyme A mutase
219125_s_at	1.49127	0.49371	RAG1AP1	3.02054	NM_001122837			202960_s_at	NM_018845		ST3 beta-galactoside alpha-2,3-sialyltransferase 6		202960_s_at	MUT	methylmalonyl Coenzyme A mutase
208808_s_at	1.54186	0.51084	HMGB2	3.01829	NM_002129			202967_at	BC000903		nucleoporin 155kDa		202967_at	GSTA4	glutathione S-transferase A4
221731_x_at	1.45277	0.481558	VCAN	3.01682	NM_001126336			203022_at	BF218922		TBC1 domain family, member 5		203022_at	RNASEH2A	ribonuclease H2, subunit A
209846_s_at	1.54026	0.511454	BTN3A2	3.01154	NM_007047			203053_at	BC002832		tripartite motif-containing 37		203053_at	BCAS2	breast carcinoma amplified sequence 2
201111_at	1.4708	0.488577	CSE1L	3.01038	NM_001316			203069_at	AF053641		SAC1 suppressor of actin mutations 1-like (yeast)		203069_at	SV2A	synaptic vesicle glycoprotein 2A
204290_s_at	1.6746	0.556678	ALDH6A1	3.00819	NM_005589			203079_s_at	NM_005589		leucine rich repeat containing 40		203079_s_at	CUL2	cullin 2
220079_s_at	1.82895	0.609392	USP48	3.00127	NM_001032730			203087_s_at	NM_018391		Fanconi anemia, complementation group I		203087_s_at	KIF2A	kinesin heavy chain member 2A
201129_at	1.69749	0.565802	SFRS7	3.00015	NM_001031684			203095_at	NM_006276		TNF receptor-associated protein 1		203095_at	MTIF2	mitochondrial translational initiation factor 2
202620_s_at	1.52611	0.50912	PLOD2	2.99754	NM_000935			203097_s_at	NM_000935		guanine monphosphate synthetase		203097_s_at	RAPGEF2	Rap guanine nucleotide exchange factor (GEF) 2
204619_s_at	1.49542	0.499769	VCAN	2.99222	NM_001126336			203098_at	BF590263		myotubularin related protein 2		203098_at	CDYL	chromodomain protein, Y-like
212730_at	1.60161	0.536165	DMN	2.98716	NM_015286			203102_s_at	AK026420		zinc finger and BTB domain containing 43		203102_s_at	MGAT2	mannosyl (alpha-1,6-)-glycoprotein beta-1,2-N-acetylglucosaminyltransferase
209478_at	1.80405	0.604005	STRA13	2.98682	NM_144998			203103_s_at	U95006		scavenger receptor class B, member 2		203103_s_at	PRPF19	PRP19/PSO4 pre-mRNA processing factor 19 homolog (S. cerevisiae)
219539_at	1.51027	0.505702	GEMIN6	2.98649	NM_024775			203114_at	NM_024775		COMM domain containing 4		203114_at	SSSCA1	Sjogren syndrome/scleroderma autoantigen 1
218129_s_at	1.39613	0.467699	NFYB	2.9851	NM_006166			203148_s_at	NM_006166		selenoprotein X, 1		203148_s_at	TRIM14	tripartite motif-containing 14
221867_at	1.4876	0.499063	N4BP1	2.98079	NM_153029			203163_at	BF436315		eukaryotic translation initiation factor 2, subunit 3 gamma, 52kDa		203163_at	KATNB1	katanin p80 (WD repeat containing) subunit B 1
209433_s_at	1.50702	0.506182	PPAT	2.97723	NM_002703			203177_x_at	AI457120		platelet-activating factor acetylhydrolase, isoform Ib, alpha subunit 45kDa		203177_x_at	TFAM	transcription factor A, mitochondrial
221932_s_at	1.63931	0.551039	GLRX5	2.97494	NM_016417			203195_s_at	AA133341		proteasome (prosome, macropain) subunit, alpha type, 7		203195_s_at	NUP98	nucleoporin 98kDa
204364_s_at	1.73913	0.585029	REEP1	2.97272	NM_022912			203200_s_at	BE535746		RAB GTPase activating protein 1		203200_s_at	MTRR	5-methyltetrahydrofolate-homocysteine methyltransferase reductase
205909_at	1.89321	0.637139	POLE2	2.97143	NM_002692			203209_at	NM_002692		translocase of outer mitochondrial membrane 70 homolog A (S. cerevisiae)		203209_at	RFC5	replication factor C (activator 1) 5, 36.5kDa
212764_at	1.25953	0.425741	ZEB1	2.95845	NM_030751			203212_s_at	AI806174		suppression of tumorigenicity 7		203212_s_at	MTMR2	myotubularin related protein 2
200906_s_at	1.75435	0.593038	PALLD	2.95824	NM_016081			203213_at	AK025843		chromodomain protein, Y-like		203213_at	CDC2	cell division cycle 2, G1 to S and G2 to M
218967_s_at	1.36407	0.461641	PTER	2.95482	NM_001001484			203214_x_at	NM_030664		quaking homolog, KH domain RNA binding (mouse)		203214_x_at	CDC2	cell division cycle 2, G1 to S and G2 to M
214953_s_at	1.51866	0.51439	APP	2.95234	NM_000484			203222_s_at	X06989		RAB11 family interacting protein 2 (class I)		203222_s_at	TLE1	transducin-like enhancer of split 1 (E(sp1) homolog, Drosophila)
203509_at	1.41663	0.480716	SORL1	2.94691	NM_003105			203243_s_at	NM_003105		von Hippel-Lindau binding protein 1		203243_s_at	PDLIM5	PDZ and LIM domain 5
210147_at	1.51412	0.513957	ART3	2.946	NM_001179			203246_s_at	U47054		minichromosome maintenance complex component 5		203246_s_at	TUSC4	tumor suppressor candidate 4
208906_at	1.60436	0.5454	BSCL2 /// HNRNPUL2	2.94163	NM_001079559			203270_at	BC004911		tetraspanin 3		203270_at	DTYMK /// LOC727761	deoxythymidylate kinase (thymidylate kinase) /// similar to Deoxythymidylate kinase (thymidylate kinase)
201476_s_at	1.50569	0.5128	RRM1	2.93621	NM_001033			203285_s_at	AI692974		serine hydroxymethyltransferase 2 (mitochondrial)		203285_s_at	HS2ST1	heparan sulfate 2-O-sulfotransferase 1
220974_x_at	1.30645	0.445434	SFXN3	2.93299	NM_030971			203291_at	NM_030971		nucleolar and spindle associated protein 1		203291_at	CNOT4	CCR4-NOT transcription complex, subunit 4
210410_s_at	1.50205	0.512628	C6orf26 /// MSH5	2.9301	NM_001039651			203306_s_at	AF034759		aldehyde dehydrogenase 6 family, member A1		203306_s_at	SLC35A1	solute carrier family 35 (CMP-sialic acid transporter), member A1
221685_s_at	1.40968	0.481408	CCDC99	2.92825	NM_017785			203333_at	AF269167		PRP40 pre-mRNA processing factor 40 homolog A (S. cerevisiae)		203333_at	KIFAP3	kinesin-associated protein 3
203803_at	1.59118	0.543549	PCYOX1	2.92738	NM_016297			203335_at	N45309		wings apart-like homolog (Drosophila)		203335_at	PHYH	phytanoyl-CoA 2-hydroxylase
213701_at	1.47317	0.504178	C12orf29	2.92193	NM_001009894			203344_s_at	AW299245		leukotriene A4 hydrolase		203344_s_at	RBBP8	retinoblastoma binding protein 8
201970_s_at	1.75488	0.600985	NASP	2.92	NM_002482			203351_s_at	NM_002482		chromosome 17 open reading frame 75		203351_s_at	ORC4L	origin recognition complex, subunit 4-like (yeast)
210983_s_at	1.86607	0.639409	MCM7	2.91843	NM_005916			203352_at	AF279900		Der1-like domain family, member 1		203352_at	ORC4L	origin recognition complex, subunit 4-like (yeast)
204228_at	1.48424	0.509273	PPIH	2.91444	NM_006347			203375_s_at	NM_006347		protein phosphatase 4 (formerly X), catalytic subunit		203375_s_at	TPP2	tripeptidyl peptidase II
201671_x_at	1.5122	0.51921	USP14	2.9125	NM_001037334			203409_at	BC003556		PRP40 pre-mRNA processing factor 40 homolog A (S. cerevisiae)		203409_at	DDB2	damage-specific DNA binding protein 2, 48kDa
200934_at	1.75401	0.602406	DEK	2.91167	NM_003472			203418_at	NM_003472		interferon stimulated exonuclease gene 20kDa-like 2		203418_at	CCNA2	cyclin A2
212845_at	1.32601	0.455846	SAMD4A	2.9089	NM_015589			203432_at	AB028976		transformation/transcription domain-associated protein		203432_at	TMPO	thymopoietin
213008_at	1.43099	0.492056	FANCI	2.90819	NM_001113378			203492_x_at	BG403615		SID1 transmembrane family, member 2		203492_x_at	CEP57	centrosomal protein 57kDa
206364_at	1.47968	0.509181	KIF14	2.90601	NM_014875			203494_s_at	NM_014875		exosome component 7		203494_s_at	CEP57	centrosomal protein 57kDa
208070_s_at	1.57402	0.54307	REV3L	2.89838	NM_002912			203495_at	NM_002912		gametogenetin binding protein 2		203495_at	LRRC14	leucine rich repeat containing 14
217099_s_at	1.33971	0.463005	GEMIN4	2.8935	NM_015721			203496_s_at	AF258545		PBX/knotted 1 homeobox 1		203496_s_at	MED1	mediator complex subunit 1
202470_s_at	1.46665	0.507293	CPSF6	2.89113	NM_007007			203509_at	NM_007007		zinc finger protein 395		203509_at	SORL1	sortilin-related receptor, L(DLR class) A repeats-containing
203209_at	1.6006	0.55368	RFC5	2.89084	NM_007370			203531_at	BC001866		serum/glucocorticoid regulated kinase 1		203531_at	CUL5	cullin 5
211023_at	1.39683	0.483346	PDHB	2.88991	NM_000925			203532_x_at	AL117618		opsin 3		203532_x_at	CUL5	cullin 5
210239_at	1.90376	0.65928	IRX5	2.88763	NM_005853			203536_s_at	U90304		eukaryotic translation initiation factor 4E nuclear import factor 1		203536_s_at	CIAO1	cytosolic iron-sulfur protein assembly 1 homolog (S. cerevisiae)
218361_at	1.28944	0.446795	GOLPH3L	2.88597	NM_018178			203537_at	NM_018178		RAD50 homolog (S. cerevisiae)		203537_at	PRPSAP2	phosphoribosyl pyrophosphate synthetase-associated protein 2
209030_s_at	1.71942	0.596397	CADM1	2.88301	NM_001098517			203538_at	NM_014333		MICAL-like 1		203538_at	CAMLG	calcium modulating ligand
203432_at	1.79972	0.624633	TMPO	2.88124	NM_001032283			203548_s_at	AW272611		ribosomal RNA processing 15 homolog (S. cerevisiae)		203548_s_at	LPL	lipoprotein lipase
219596_at	1.37688	0.477954	THAP10	2.88079	NM_020147			203549_s_at	NM_020147		glucosidase, beta; acid (includes glucosylceramidase) /// glucosidase, beta; acid, pseudogene		203549_s_at	LPL	lipoprotein lipase
216411_s_at	1.38375	0.481919	GALK2	2.87134	NM_001001556			203554_x_at	AK023699		zinc finger CCCH-type containing 15		203554_x_at	PTTG1	pituitary tumor-transforming 1
213537_at	1.2675	0.441596	HLA-DPA1	2.87028	NM_033554			203560_at	AI128225		KIAA0240		203560_at	GGH	gamma-glutamyl hydrolase (conjugase, folylpolygammaglutamyl hydrolase)
219988_s_at	1.33718	0.466325	C1orf164	2.8675	NM_018150			203588_s_at	NM_018150		tubulin, gamma 1		203588_s_at	TFDP2	transcription factor Dp-2 (E2F dimerization partner 2)
201363_s_at	1.49697	0.522117	IVNS1ABP	2.86711	NM_006469			203608_at	AB020657		eukaryotic translation initiation factor 2-alpha kinase 1		203608_at	ALDH5A1	aldehyde dehydrogenase 5 family, member A1 (succinate-semialdehyde dehydrogenase)
205393_s_at	1.82716	0.637729	CHEK1	2.86511	NM_001114121			203625_x_at	NM_001274		RAB GTPase activating protein 1-like		203625_x_at	SKP2	S-phase kinase-associated protein 2 (p45)
204835_at	1.60572	0.56103	POLA1	2.8621	NM_016937			203654_s_at	NM_016937		transcription factor 7-like 2 (T-cell specific, HMG-box)		203654_s_at	COIL	coilin
212810_s_at	1.53058	0.535025	SLC1A4	2.86077	NM_003038			203680_at	W72527		zinc finger, CCHC domain containing 10		203680_at	PRKAR2B	protein kinase, cAMP-dependent, regulatory, type II, beta
205590_at	1.41725	0.495574	RASGRP1	2.85981	NM_005739			203690_at	NM_005739		tubulin folding cofactor B		203690_at	TUBGCP3	tubulin, gamma complex associated protein 3
201218_at	1.31634	0.46034	CTBP2	2.85949	NM_001083914			203708_at	N23018		centromere protein E, 312kDa		203708_at	PDE4B	phosphodiesterase 4B, cAMP-specific (phosphodiesterase E4 dunce homolog, Drosophila)
221589_s_at	1.30869	0.458401	ALDH6A1	2.85491	NM_005589			203755_at	AW612403		cell division cycle 2, G1 to S and G2 to M		203755_at	BUB1B	BUB1 budding uninhibited by benzimidazoles 1 homolog beta (yeast)
218957_s_at	1.47495	0.516769	PAAF1	2.85418	NM_025155			203764_at	NM_025155		phosphatidylinositol glycan anchor biosynthesis, class K		203764_at	DLG7	discs, large homolog 7 (Drosophila)
202107_s_at	1.62502	0.569427	MCM2	2.85378	NM_004526			203773_x_at	NM_004526		UTP6, small subunit (SSU) processome component, homolog (yeast)		203773_x_at	BLVRA	biliverdin reductase A
221896_s_at	1.52196	0.533537	HIGD1A	2.85259	NM_001099668			203789_s_at	BE739519		mitochondrial translational initiation factor 2		203789_s_at	SEMA3C	sema domain, immunoglobulin domain (Ig), short basic domain, secreted, (semaphorin) 3C
216602_s_at	1.50163	0.526531	FARSA	2.85194	NM_004461			203803_at	AD000092		cullin 4B		203803_at	PCYOX1	prenylcysteine oxidase 1
221618_s_at	1.31913	0.462686	LOC728198 /// TAF9B	2.85102	NM_015975			203830_at	AF220509		ribosomal RNA processing 1 homolog B (S. cerevisiae)		203830_at	C17orf75	chromosome 17 open reading frame 75
202960_s_at	1.55922	0.547207	MUT	2.84942	NM_000255			203832_at	NM_000255		succinate dehydrogenase complex, subunit A, flavoprotein (Fp)		203832_at	SNRPF	small nuclear ribonucleoprotein polypeptide F
202580_x_at	1.53127	0.537522	FOXM1	2.84875	NM_021953			203856_at	NM_021953		golgi SNAP receptor complex member 1		203856_at	VRK1	vaccinia related kinase 1
212154_at	1.47556	0.520018	SDC2	2.83753	NM_002998			203883_s_at	AI380298		methionine sulfoxide reductase B2		203883_s_at	RAB11FIP2	RAB11 family interacting protein 2 (class I)
201722_s_at	1.32962	0.468628	GALNT1	2.83727	NM_020474			203895_at	AV692127		katanin p80 (WD repeat containing) subunit B 1		203895_at	PLCB4	phospholipase C, beta 4
204825_at	1.57905	0.557189	MELK	2.83397	NM_014791			203917_at	NM_014791		casein kinase 2, alpha 1 polypeptide		203917_at	CXADR	coxsackie virus and adenovirus receptor
203246_s_at	1.41967	0.50095	TUSC4	2.83396	NM_006545			203941_at	NM_006545		RAB5A, member RAS oncogene family		203941_at	INTS9	integrator complex subunit 9
204887_s_at	1.55299	0.548817	PLK4	2.82971	NM_014264			203963_at	NM_014264		X-ray repair complementing defective repair in Chinese hamster cells 5 (double-strand-break rejoining; Ku autoantigen, 80kDa)		203963_at	CA12	carbonic anhydrase XII
215629_s_at	1.44751	0.51177	DLEU2 /// DLEU2L	2.82845	NR_002612			203964_at	AA905286		DEAD (Asp-Glu-Ala-Asp) box polypeptide 24		203964_at	NMI	N-myc (and STAT) interactor
208368_s_at	1.48798	0.526111	BRCA2	2.82826	NM_000059			203967_at	NM_000059		chaperonin containing TCP1, subunit 6A (zeta 1)		203967_at	CDC6	cell division cycle 6 homolog (S. cerevisiae)
202191_s_at	1.4253	0.504448	GAS7	2.82546	NM_003644			203968_s_at	BE439987		core-binding factor, beta subunit		203968_s_at	CDC6	cell division cycle 6 homolog (S. cerevisiae)
217889_s_at	1.44381	0.51126	CYBRD1	2.82402	NM_024843			203976_s_at	NM_024843		family with sequence similarity 45, member B /// family with sequence similarity 45, member A		203976_s_at	CHAF1A	chromatin assembly factor 1, subunit A (p150)
201830_s_at	1.34025	0.47463	NET1	2.82379	NM_001047160			203979_at	NM_005863		thioredoxin domain containing 14		203979_at	CYP27A1	cytochrome P450, family 27, subfamily A, polypeptide 1
221521_s_at	1.48758	0.528638	GINS2	2.81398	NM_016095			204004_at	BC003186		RNA pseudouridylate synthase domain containing 2		204004_at	PAWR	PRKC, apoptosis, WT1, regulator
218542_at	1.44669	0.514527	CEP55	2.81169	NM_001127182			204019_s_at	NM_018131		decapping enzyme, scavenger		204019_s_at	SH3YL1	SH3 domain containing, Ysc84-like 1 (S. cerevisiae)
218244_at	1.6139	0.574178	NOL8	2.81081	NM_017948			204023_at	NM_017948		NADH dehydrogenase (ubiquinone) flavoprotein 1, 51kDa		204023_at	RFC4	replication factor C (activator 1) 4, 37kDa
205150_s_at	1.72258	0.612859	KIAA0644	2.81072	NM_014817			204026_s_at	AV724192		pellino homolog 2 (Drosophila)		204026_s_at	ZWINT	ZW10 interactor
218248_at	1.55989	0.554987	FAM111A	2.81069	NM_022074			204028_s_at	NM_022074		alcohol dehydrogenase 5 (class III), chi polypeptide		204028_s_at	RABGAP1	RAB GTPase activating protein 1
208753_s_at	1.61621	0.575252	NAP1L1	2.80958	NM_004537 /// NM_139207			204091_at	BC002387		ribosomal protein S21		204091_at	PDE6D	phosphodiesterase 6D, cGMP-specific, rod, delta
212138_at	1.20001	0.427172	PDS5A	2.80918	NM_001100399 /// NM_001100400 /// NM_015200			204092_s_at	AK021757		protein tyrosine phosphatase, non-receptor type 11 (Noonan syndrome 1)		204092_s_at	AURKA	aurora kinase A
219880_at	1.42728	0.508192	---	2.80854	---			204126_s_at	NM_022907		survival motor neuron domain containing 1		204126_s_at	CDC45L	CDC45 cell division cycle 45-like (S. cerevisiae)
205240_at	1.43891	0.512878	GPSM2	2.80557	NM_013296			204127_at	NM_013296		importin 7		204127_at	RFC3	replication factor C (activator 1) 3, 38kDa
209759_s_at	1.54185	0.549768	DCI	2.80455	NM_001919			204128_s_at	BC002746		FCF1 small subunit (SSU) processome component homolog (S. cerevisiae) /// mitogen-activated protein kinase 1 interacting protein 1-like		204128_s_at	RFC3	replication factor C (activator 1) 3, 38kDa
205968_at	1.37664	0.491066	KCNS3	2.80337	NM_002252			204146_at	NM_002252		integrator complex subunit 9		204146_at	RAD51AP1	RAD51 associated protein 1
209798_at	1.473	0.526899	NPAT	2.7956	NM_002519			204162_at	D83243		SH3 domain containing, Ysc84-like 1 (S. cerevisiae)		204162_at	NDC80	NDC80 homolog, kinetochore complex component (S. cerevisiae)
209709_s_at	1.34827	0.482374	HMMR	2.79508	NM_012484 /// NM_012485			204182_s_at	U29343		membrane-associated ring finger (C3HC4) 6		204182_s_at	ZBTB43	zinc finger and BTB domain containing 43
209527_at	1.68203	0.603319	EXOSC2	2.78795	NM_014285			204195_s_at	BC000747		TRAF and TNF receptor associated protein		204195_s_at	PKNOX1	PBX/knotted 1 homeobox 1
218350_s_at	1.38646	0.497588	GMNN	2.78637	NM_015895			204216_s_at	NM_015895		cyclin-dependent kinase 5		204216_s_at	ZC3H14	zinc finger CCCH-type containing 14
200841_s_at	1.503	0.539695	EPRS	2.78491	NM_004446			204224_s_at	AI142677		tetratricopeptide repeat domain 4		204224_s_at	GCH1	GTP cyclohydrolase 1 (dopa-responsive dystonia)
204127_at	1.51176	0.542999	RFC3	2.78409	NM_002915 /// NM_181558			204228_at	BC000149		gamma-glutamyl hydrolase (conjugase, folylpolygammaglutamyl hydrolase)		204228_at	PPIH	peptidylprolyl isomerase H (cyclophilin H)
213725_x_at	1.30793	0.469959	XYLT1	2.78307	NM_022166			204238_s_at	AI693140		Rap guanine nucleotide exchange factor (GEF) 5		204238_s_at	C6orf108	chromosome 6 open reading frame 108
212033_at	1.63875	0.588971	RBM25	2.78239	NM_021239			204240_s_at	BF055107		Sp3 transcription factor		204240_s_at	SMC2	structural maintenance of chromosomes 2
213484_at	1.33192	0.479268	---	2.77907	---			204247_s_at	AI097640		cullin 2		204247_s_at	CDK5	cyclin-dependent kinase 5
212766_s_at	1.49588	0.538397	ISG20L2	2.77839	NM_030980			204254_s_at	AW294587		zinc finger protein 292		204254_s_at	VDR	vitamin D (1,25- dihydroxyvitamin D3) receptor
212973_at	1.70915	0.615361	RPIA	2.77748	NM_144563			204256_at	AI692341		DEAD (Asp-Glu-Ala-Asp) box polypeptide 18		204256_at	ELOVL6	ELOVL family member 6, elongation of long chain fatty acids (FEN1/Elo2, SUR4/Elo3-like, yeast)
210139_s_at	1.35397	0.487705	PMP22	2.7762	NM_000304 /// NM_153321 /// NM_153322			204274_at	L03203		clathrin, light chain (Lcb)		204274_at	EBAG9	estrogen receptor binding site associated, antigen, 9
213129_s_at	1.47961	0.533461	GCSH /// LOC730107	2.77361	NM_004483 /// XM_001134369 /// XM_001721064			204281_at	AI970157		three prime repair exonuclease 2 /// UCHL5 interacting protein		204281_at	TEAD4	TEA domain family member 4
207606_s_at	1.36012	0.490578	ARHGAP12	2.77248	NM_018287			204285_s_at	NM_018287		stress-associated endoplasmic reticulum protein 1		204285_s_at	PMAIP1	phorbol-12-myristate-13-acetate-induced protein 1
204767_s_at	1.55809	0.562071	FEN1	2.77205	NM_004111			204290_s_at	BC000323		protein phosphatase 1, regulatory (inhibitor) subunit 7		204290_s_at	ALDH6A1	aldehyde dehydrogenase 6 family, member A1
211833_s_at	1.96114	0.707546	BAX	2.77174	NM_004324 /// NM_138761 /// NM_138763 /// NM_138764 /// NM_138765			204295_at	U19599		UDP-N-acetyl-alpha-D-galactosamine:polypeptide N-acetylgalactosaminyltransferase 14 (GalNAc-T14)		204295_at	SURF1	surfeit 1
202451_at	1.33303	0.480965	GTF2H1	2.77157	NM_005316			204300_at	BC000365		ubiquitin associated protein 2-like		204300_at	PET112L	PET112-like (yeast)
214173_x_at	1.43194	0.517738	C19orf2	2.76576	NM_003796 /// NM_134447			204313_s_at	AW514900		oxoglutarate dehydrogenase-like		204313_s_at	CREB1	cAMP responsive element binding protein 1
209754_s_at	1.37385	0.497342	TMPO	2.76238	NM_001032283 /// NM_001032284 /// NM_003276			204318_s_at	AF113682		KIAA0859		204318_s_at	GTSE1	G-2 and S-phase expressed 1
201515_s_at	1.29993	0.470707	TSN	2.76165	NM_004622			204326_x_at	NM_004622		proteasome (prosome, macropain) 26S subunit, ATPase, 3		204326_x_at	MT1X	metallothionein 1X
202276_at	1.45426	0.526705	SHFM1	2.76106	NM_006304			204332_s_at	NM_006304		heterogeneous nuclear ribonucleoprotein A/B		204332_s_at	AGA	aspartylglucosaminidase
209234_at	1.5091	0.547207	KIF1B	2.75782	NM_015074 /// NM_183416			204354_at	BF939474		retinoic acid induced 14		204354_at	POT1	POT1 protection of telomeres 1 homolog (S. pombe)
213226_at	1.4632	0.530736	CCNA2	2.75692	NM_001237			204364_s_at	AI346350		YY1 transcription factor		204364_s_at	REEP1	receptor accessory protein 1
211675_s_at	1.23576	0.448616	MDFIC	2.75461	NM_199072			204369_at	AF054589		tumor suppressor candidate 3		204369_at	PIK3CA	phosphoinositide-3-kinase, catalytic, alpha polypeptide
201774_s_at	1.52253	0.553055	NCAPD2	2.75294	NM_014865			204386_s_at	AK022511		survival of motor neuron protein interacting protein 1		204386_s_at	MRP63	mitochondrial ribosomal protein 63
201569_s_at	1.28279	0.466059	LOC100131861 /// SAMM50	2.75242	NM_015380 /// XM_001716418 /// XM_001724537 /// XM_001725780			204396_s_at	NM_015380		Wolf-Hirschhorn syndrome candidate 1		204396_s_at	GRK5	G protein-coupled receptor kinase 5
207515_s_at	1.34921	0.490735	POLR1C	2.74938	NM_004875 /// NM_203290			204441_s_at	NM_004875		cyclin E2		204441_s_at	POLA2	polymerase (DNA directed), alpha 2 (70kD subunit)
203976_s_at	1.74172	0.634263	CHAF1A	2.74605	NM_005483			204453_at	NM_005483		CD47 molecule		204453_at	ZNF84	zinc finger protein 84
217526_at	1.51479	0.552069	NFATC2IP	2.74383	NM_032815			204460_s_at	AI478300		alcohol dehydrogenase 5 (class III), chi polypeptide		204460_s_at	RAD1	RAD1 homolog (S. pombe)
220633_s_at	1.27995	0.466572	HP1BP3	2.7433	NM_016287			204504_s_at	NM_016287		glutaminyl-tRNA synthase (glutamine-hydrolyzing)-like 1		204504_s_at	HIRIP3	HIRA interacting protein 3
209307_at	1.3949	0.50898	SWAP70	2.74058	NM_015055			204521_at	AB014540		plakophilin 4		204521_at	C12orf24	chromosome 12 open reading frame 24
201761_at	1.41606	0.516727	MTHFD2	2.74044	NM_001040409 /// NM_006636			204566_at	NM_006636		torsin A interacting protein 1		204566_at	PPM1D	protein phosphatase 1D magnesium-dependent, delta isoform
205673_s_at	1.79952	0.656837	ASB9	2.73968	NM_001031739 /// NM_024087			204618_s_at	NM_024087		sorting nexin 5		204618_s_at	GABPB2	GA binding protein transcription factor, beta subunit 2
212955_s_at	1.57604	0.576689	POLR2I	2.73292	NM_006233			204619_s_at	AL037557		mitochondrial ribosomal protein L4		204619_s_at	VCAN	versican
203773_x_at	1.48901	0.545477	BLVRA	2.72973	NM_000712			204620_s_at	NM_000712		v-yes-1 Yamaguchi sarcoma viral oncogene homolog 1		204620_s_at	VCAN	versican
217731_s_at	1.81845	0.667822	ITM2B	2.72296	NM_021999			204630_s_at	NM_021999		cAMP responsive element binding protein 1		204630_s_at	GOSR1	golgi SNAP receptor complex member 1
219911_s_at	1.85722	0.682298	LOC100134295 /// SLCO4A1	2.722	NM_016354 /// XM_001720240			204633_s_at	NM_016354		adenylosuccinate lyase		204633_s_at	RPS6KA5	ribosomal protein S6 kinase, 90kDa, polypeptide 5
209980_s_at	1.88382	0.692182	SHMT1	2.72157	NM_004169 /// NM_148918			204639_at	L23928		ribonuclease T2		204639_at	ADA	adenosine deaminase
206200_s_at	1.7088	0.627971	ANXA11	2.72115	NM_001157 /// NM_145868 /// NM_145869			204653_at	NM_001157		peroxisomal trans-2-enoyl-CoA reductase		204653_at	TFAP2A	transcription factor AP-2 alpha (activating enhancer binding protein 2 alpha)
209394_at	1.43033	0.526998	ASMTL	2.71411	NM_004192 /// XM_001713702			204681_s_at	BC002508		zinc finger, AN1-type domain 1		204681_s_at	RAPGEF5	Rap guanine nucleotide exchange factor (GEF) 5
202173_s_at	1.47153	0.542231	VEZF1	2.71385	NM_007146			204695_at	NM_007146		chromosome 1 open reading frame 112		204695_at	CDC25A	cell division cycle 25 homolog A (S. pombe)
209426_s_at	1.40804	0.518859	AMACR /// C1QTNF3	2.71372	NM_014324 /// NM_030945 /// NM_181435 /// NM_203382			204709_s_at	AF047020		Rap guanine nucleotide exchange factor (GEF) 2		204709_s_at	KIF23	kinesin family member 23
204875_s_at	1.75945	0.648399	GMDS	2.71353	NM_001500			204720_s_at	NM_001500		mitochondrial ribosomal protein S33		204720_s_at	DNAJC6	DnaJ (Hsp40) homolog, subfamily C, member 6
201202_at	1.55561	0.573279	PCNA	2.71353	NM_002592 /// NM_182649			204744_s_at	NM_002592		leptin receptor overlapping transcript		204744_s_at	IARS	isoleucyl-tRNA synthetase
208022_s_at	1.27091	0.46902	CDC14B /// CDC14C	2.70971	NM_001077181 /// NM_003671 /// NM_033331 /// NR_003595			204766_s_at	NM_003671		ribosomal protein L22		204766_s_at	NUDT1	nudix (nucleoside diphosphate linked moiety X)-type motif 1
218039_at	1.31537	0.485879	NUSAP1	2.70719	NM_016359 /// NM_018454			204767_s_at	NM_016359		peptidylprolyl isomerase G (cyclophilin G)		204767_s_at	FEN1	flap structure-specific endonuclease 1
212037_at	1.32524	0.489884	PNN	2.70522	NM_002687			204771_s_at	BF508848		CSE1 chromosome segregation 1-like (yeast)		204771_s_at	TTF1	transcription termination factor, RNA polymerase I
209033_s_at	1.28275	0.475128	DYRK1A	2.69979	NM_001396 /// NM_101395 /// NM_130436 /// NM_130437 /// NM_130438			204773_at	D86550		development and differentiation enhancing factor 1		204773_at	IL11RA	interleukin 11 receptor, alpha
205140_at	1.50738	0.55863	FPGT	2.69835	NM_003838			204775_at	NM_003838		sperm specific antigen 2		204775_at	CHAF1B	chromatin assembly factor 1, subunit B (p60)
204778_x_at	1.77941	0.65994	HOXB7	2.69632	NM_004502			204778_x_at	AW102783		CD47 molecule		204778_x_at	HOXB7	homeobox B7
219494_at	1.42443	0.528598	RAD54B	2.69474	NM_012415			204779_s_at	NM_012415		acyl-CoA thioesterase 9		204779_s_at	HOXB7	homeobox B7
204004_at	1.61077	0.59862	PAWR	2.6908	NM_002583			204798_at	AI336206		retinoblastoma binding protein 4		204798_at	MYB	v-myb myeloblastosis viral oncogene homolog (avian)
209288_s_at	1.4377	0.534347	CDC42EP3	2.69057	NM_006449			204807_at	AL136842		ATP-binding cassette, sub-family B (MDR/TAP), member 7		204807_at	TMEM5	transmembrane protein 5
201504_s_at	1.4631	0.543998	TSN	2.68954	NM_004622			204808_s_at	AI435302		development and differentiation enhancing factor 2		204808_s_at	TMEM5	transmembrane protein 5
218313_s_at	1.22505	0.45578	GALNT7	2.6878	NM_017423			204820_s_at	NM_017423		RAP1, GTP-GDP dissociation stimulator 1		204820_s_at	BTN3A2 /// BTN3A3	butyrophilin, subfamily 3, member A3 /// butyrophilin, subfamily 3, member A2
220230_s_at	2.04026	0.759262	CYB5R2	2.68716	NM_016229			204822_at	NM_016229		coiled-coil domain containing 91		204822_at	TTK	TTK protein kinase
214608_s_at	1.18029	0.439652	EYA1	2.68461	NM_000503 /// NM_172058 /// NM_172059 /// NM_172060			204825_at	AJ000098		COX15 homolog, cytochrome c oxidase assembly protein (yeast)		204825_at	MELK	maternal embryonic leucine zipper kinase
205110_s_at	1.43732	0.535502	FGF13	2.68406	NM_004114 /// NM_033642			204827_s_at	NM_004114		RD RNA binding protein		204827_s_at	CCNF	cyclin F
203967_at	1.47688	0.550268	CDC6	2.68392	NM_001254			204831_at	U77949		eukaryotic translation initiation factor 3, subunit C /// eukaryotic translation initiation factor 3, subunit C-like		204831_at	CDK8	cyclin-dependent kinase 8
212221_x_at	1.49702	0.557897	IDS	2.68333	NM_000202 /// NM_006123			204833_at	AV703259		dicarbonyl/L-xylulose reductase		204833_at	ATG12	ATG12 autophagy related 12 homolog (S. cerevisiae)
212141_at	1.71262	0.638266	MCM4	2.68323	NM_005914 /// NM_182746			204835_at	AA604621		SMT3 suppressor of mif two 3 homolog 3 (S. cerevisiae)		204835_at	POLA1	polymerase (DNA directed), alpha 1
205034_at	1.7167	0.640302	CCNE2	2.68108	NM_057749			204839_at	NM_004702		aldehyde dehydrogenase 7 family, member A1		204839_at	POP5	processing of precursor 5, ribonuclease P/MRP subunit (S. cerevisiae)
212745_s_at	1.62954	0.608328	BBS4	2.67872	NM_033028			204849_at	AI813772		plakophilin 4		204849_at	TCFL5	transcription factor-like 5 (basic helix-loop-helix)
204453_at	1.7259	0.644416	ZNF84	2.67823	NM_003428			204873_at	NM_003428		frizzled homolog 5 (Drosophila)		204873_at	PEX1	peroxisome biogenesis factor 1
202330_s_at	1.83853	0.686848	UNG	2.67677	NM_003362 /// NM_080911			204875_s_at	NM_003362		mRNA turnover 4 homolog (S. cerevisiae)		204875_s_at	GMDS	GDP-mannose 4,6-dehydratase
202188_at	1.4736	0.550678	NUP93	2.67598	NM_014669			204887_s_at	NM_014669		coenzyme Q9 homolog (S. cerevisiae)		204887_s_at	PLK4	polo-like kinase 4 (Drosophila)
208897_s_at	1.39956	0.523306	DDX18	2.67445	NM_006773			204930_s_at	BC003360		O-sialoglycoprotein endopeptidase-like 1		204930_s_at	BNIP1	BCL2/adenovirus E1B 19kDa interacting protein 1
201770_at	1.3931	0.520924	SNRPA	2.67429	NM_004596			204932_at	NM_004596		ATG12 autophagy related 12 homolog (S. cerevisiae)		204932_at	TNFRSF11B	tumor necrosis factor receptor superfamily, member 11b (osteoprotegerin)
221998_s_at	1.49032	0.557433	VRK3	2.67354	NM_001025778 /// NM_016440			204962_s_at	BF062886		kelch domain containing 3		204962_s_at	CENPA	centromere protein A
201827_at	1.58561	0.593527	SMARCD2	2.67151	NM_001098426 /// NM_003077			204973_at	AF113019		suppressor of Ty 16 homolog (S. cerevisiae)		204973_at	GJB1	gap junction protein, beta 1, 32kDa
201039_s_at	1.6801	0.628963	RAD23A	2.67123	NM_005053			205024_s_at	BF572938		zinc finger protein 238		205024_s_at	RAD51	RAD51 homolog (RecA homolog, E. coli) (S. cerevisiae)
220651_s_at	1.66661	0.624162	MCM10	2.67015	NM_018518 /// NM_182751			205030_at	NM_018518		gelsolin (amyloidosis, Finnish type)		205030_at	FABP7	fatty acid binding protein 7, brain
212432_at	1.50733	0.564841	GRPEL1	2.66859	NM_025196			205031_at	AL542571		electron-transfer-flavoprotein, beta polypeptide		205031_at	EFNB3	ephrin-B3
204709_s_at	1.53591	0.576015	KIF23	2.66644	NM_004856 /// NM_138555			205034_at	NM_004856		protein kinase, cAMP-dependent, regulatory, type II, beta		205034_at	CCNE2	cyclin E2
203022_at	1.56556	0.587245	RNASEH2A	2.66593	NM_006397			205046_at	NM_006397		glutamate decarboxylase 1 (brain, 67kDa)		205046_at	CENPE	centromere protein E, 312kDa
218676_s_at	1.40262	0.526292	PCTP	2.66511	NM_001102402 /// NM_021213			205047_s_at	NM_021213		septin 6 /// cytokine-like nuclear factor n-pac		205047_s_at	ASNS	asparagine synthetase
211285_s_at	1.61789	0.608061	UBE3A	2.66073	NM_000462 /// NM_130838 /// NM_130839			205053_at	U84404		KIAA0528		205053_at	PRIM1	primase, DNA, polypeptide 1 (49kDa)
204744_s_at	1.39342	0.523922	IARS	2.65959	NM_002161 /// NM_013417			205066_s_at	NM_013417		family with sequence similarity 49, member B		205066_s_at	ENPP1	ectonucleotide pyrophosphatase/phosphodiesterase 1
202095_s_at	1.52549	0.573596	BIRC5	2.65952	NM_001012270 /// NM_001012271 /// NM_001168			205070_at	NM_001168		exportin 1 (CRM1 homolog, yeast)		205070_at	ING3	inhibitor of growth family, member 3
218930_s_at	1.37794	0.518171	TMEM106B	2.65924	NM_018374			205071_x_at	NM_018374		small nuclear ribonucleoprotein polypeptide F		205071_x_at	XRCC4	X-ray repair complementing defective repair in Chinese hamster cells 4
203964_at	1.56904	0.591093	NMI	2.65448	NM_004688			205078_at	NM_004688		nucleolar protein 3 (apoptosis repressor with CARD domain)		205078_at	PIGF	phosphatidylinositol glycan anchor biosynthesis, class F
204808_s_at	1.36836	0.515567	TMEM5	2.65408	NM_014254			205079_s_at	NM_014254		O-linked N-acetylglucosamine (GlcNAc) transferase (UDP-N-acetylglucosamine:polypeptide-N-acetylglucosaminyl transferase)		205079_s_at	MPDZ	multiple PDZ domain protein
44783_s_at	1.32445	0.499149	HEY1	2.65343	NM_001040708 /// NM_012258			205097_at	R61374		insulin induced gene 2		205097_at	SLC26A2	solute carrier family 26 (sulfate transporter), member 2
216100_s_at	1.76564	0.665861	TOR1AIP1	2.65167	NM_015602			205110_s_at	BG289527		BUB1 budding uninhibited by benzimidazoles 1 homolog (yeast)		205110_s_at	FGF13	fibroblast growth factor 13
213413_at	1.89696	0.71543	STON1	2.6515	NM_006873			205130_at	BG434174		RAD51 homolog C (S. cerevisiae)		205130_at	RAGE	renal tumor antigen
204460_s_at	1.41382	0.53326	RAD1	2.65128	NM_002853 /// NM_133377			205133_s_at	AF074717		phosphoinositide-3-kinase, catalytic, alpha polypeptide		205133_s_at	HSPE1	heat shock 10kDa protein 1 (chaperonin 10)
201528_at	1.37634	0.519256	RPA1	2.6506	NM_002945			205140_at	BG398414		glutathione synthetase		205140_at	FPGT	fucose-1-phosphate guanylyltransferase
208965_s_at	1.30917	0.493924	IFI16	2.65054	NM_005531			205150_s_at	BG256677		polymerase (DNA-directed), delta 3, accessory subunit		205150_s_at	KIAA0644	KIAA0644 gene product
209025_s_at	1.486	0.560882	SYNCRIP	2.64941	NM_006372			205168_at	AF037448		cytosolic iron-sulfur protein assembly 1 homolog (S. cerevisiae)		205168_at	DDR2	discoidin domain receptor tyrosine kinase 2
217725_x_at	1.61168	0.609073	SERBP1	2.64612	NM_001018067 /// NM_001018068 /// NM_001018069 /// NM_015640			205174_s_at	NM_015640		heparan sulfate 2-O-sulfotransferase 1		205174_s_at	QPCT	glutaminyl-peptide cyclotransferase (glutaminyl cyclase)
201756_at	1.51206	0.57146	RPA2	2.64597	NM_002946			205227_at	NM_002946		B9 protein domain 1		205227_at	IL1RAP	interleukin 1 receptor accessory protein
210389_x_at	1.47589	0.557964	TUBD1	2.64514	NM_016261			205240_at	BC000258		SWI/SNF related, matrix associated, actin dependent regulator of chromatin, subfamily a, member 4		205240_at	GPSM2	G-protein signaling modulator 2 (AGS3-like, C. elegans)
201120_s_at	1.4329	0.541717	PGRMC1	2.6451	NM_006667			205273_s_at	AL547946		inhibitor of growth family, member 3		205273_s_at	PITRM1	pitrilysin metallopeptidase 1
221837_at	1.47905	0.55927	KLHL22	2.64462	NM_032775			205278_at	BG325646		forkhead box J3		205278_at	GAD1	glutamate decarboxylase 1 (brain, 67kDa)
220494_s_at	1.58586	0.599709	---	2.64439	---			205283_at	NM_018678		DiGeorge syndrome critical region gene 6 /// DiGeorge syndrome critical region gene 6-like		205283_at	FKTN	fukutin
212687_at	1.54774	0.585784	LIMS1	2.64218	NM_004987			205321_at	AL110164		processing of precursor 5, ribonuclease P/MRP subunit (S. cerevisiae)		205321_at	EIF2S3	eukaryotic translation initiation factor 2, subunit 3 gamma, 52kDa
204326_x_at	1.62553	0.61599	MT1X	2.63889	NM_005952			205345_at	NM_002450		mitochondrial ribosomal protein 63		205345_at	BARD1	BRCA1 associated RING domain 1
201674_s_at	1.46805	0.556444	AKAP1	2.63826	NM_003488			205356_at	BC000729		tropomyosin 1 (alpha)		205356_at	USP13	ubiquitin specific peptidase 13 (isopeptidase T-3)
218664_at	1.47121	0.557799	MECR	2.63753	NM_001024732 /// NM_016011			205369_x_at	NM_016011		N-6 adenine-specific DNA methyltransferase 1 (putative)		205369_x_at	DBT	dihydrolipoamide branched chain transacylase E2
214773_x_at	1.25394	0.475683	TIPRL	2.63607	NM_001031800 /// NM_152902			205376_at	AI983505		G protein beta subunit-like		205376_at	INPP4B	inositol polyphosphate-4-phosphatase, type II, 105kDa
215079_at	1.57364	0.597015	---	2.63584	---			205393_s_at	AK026723		dehydrogenase/reductase (SDR family) member 7B		205393_s_at	CHEK1	CHK1 checkpoint homolog (S. pombe)
220992_s_at	1.30874	0.496852	C1orf25	2.63407	NM_030934			205407_at	NM_030934		replication protein A3, 14kDa		205407_at	RECK	reversion-inducing-cysteine-rich protein with kazal motifs
214086_s_at	1.44828	0.549833	PARP2	2.63403	NM_001042618 /// NM_005484			205412_at	AK001980		thioredoxin domain containing 13		205412_at	ACAT1	acetyl-Coenzyme A acetyltransferase 1 (acetoacetyl Coenzyme A thiolase)
213478_at	1.57154	0.597457	RP1-21O18.1	2.63039	NM_001017999 /// NM_001018000 /// NM_001018001 /// NM_015209 /// NM_201628			205413_at	AB028949		heterogeneous nuclear ribonucleoprotein H3 (2H9)		205413_at	MPPED2	metallophosphoesterase domain containing 2
218781_at	1.35864	0.516686	SMC6	2.62953	NM_024624			205433_at	NM_024624		phosphatidylinositol glycan anchor biosynthesis, class C		205433_at	BCHE	butyrylcholinesterase
205024_s_at	1.63441	0.621562	RAD51	2.62953	NM_002875 /// NM_133487			205436_s_at	NM_002875		PRP6 pre-mRNA processing factor 6 homolog (S. cerevisiae)		205436_s_at	H2AFX	H2A histone family, member X
209065_at	1.31801	0.501431	UQCRB	2.6285	NM_006294			205498_at	BC005230		GA binding protein transcription factor, beta subunit 2		205498_at	GHR	growth hormone receptor
218839_at	1.31943	0.502003	HEY1	2.62833	NM_001040708 /// NM_012258			205524_s_at	NM_012258		glutathione S-transferase A4		205524_s_at	HAPLN1	hyaluronan and proteoglycan link protein 1
209967_s_at	1.55526	0.592027	CREM	2.62702	NM_001881 /// NM_181571 /// NM_182717 /// NM_182718 /// NM_182719 /// NM_182720 /// NM_182721 /// NM_182722 /// NM_182723 /// NM_182724 /// NM_182725 /// NM_182769 /// NM_182770 /// NM_182771 /// NM_182772 /// NM_182850 /// NM_182853 /// NM_183011 /// NM_183012 /// NM_183013 /// NM_183060			205527_s_at	D14826		chromosome 12 open reading frame 24		205527_s_at	GEMIN4	gem (nuclear organelle) associated protein 4
204504_s_at	1.56418	0.595609	HIRIP3	2.62619	NM_003609			205542_at	NM_003609		WW domain binding protein 11		205542_at	STEAP1	six transmembrane epithelial antigen of the prostate 1
204128_s_at	1.55262	0.591373	RFC3	2.62546	NM_002915 /// NM_181558			205590_at	NM_002915		surfeit 1		205590_at	RASGRP1	RAS guanyl releasing protein 1 (calcium and DAG-regulated)
204092_s_at	1.62843	0.620629	AURKA	2.62383	NM_003600 /// NM_198433 /// NM_198434 /// NM_198435 /// NM_198436 /// NM_198437			205613_at	NM_003600		RNA binding motif protein 35A		205613_at	SYT17	synaptotagmin XVII
218875_s_at	1.52508	0.582143	FBXO5	2.61977	NM_012177			205662_at	NM_012177		adenosine deaminase		205662_at	B9D1	B9 protein domain 1
212312_at	1.68031	0.64224	BCL2L1	2.61633	NM_001191 /// NM_138578			205673_s_at	AL117381		transcription termination factor, RNA polymerase I		205673_s_at	ASB9	ankyrin repeat and SOCS box-containing 9
222039_at	1.47457	0.563646	KIF18B	2.61613	NM_001080443			205681_at	AA292789		UTP14, U3 small nucleolar ribonucleoprotein, homolog A (yeast)		205681_at	BCL2A1	BCL2-related protein A1
204720_s_at	1.28211	0.490294	DNAJC6	2.61498	NM_014787			205716_at	AV729634		protein phosphatase 3 (formerly 2B), catalytic subunit, alpha isoform		205716_at	SLC25A40	solute carrier family 25, member 40
208956_x_at	1.49963	0.57367	DUT	2.6141	NM_001025248 /// NM_001025249 /// NM_001948			205763_s_at	U62891		signal peptidase complex subunit 2 homolog (S. cerevisiae)		205763_s_at	DDX18	DEAD (Asp-Glu-Ala-Asp) box polypeptide 18
205433_at	1.4127	0.540531	BCHE	2.61354	NM_000055			205808_at	NM_000055		phosphatidylinositol-specific phospholipase C, X domain containing 1		205808_at	ASPH	aspartate beta-hydroxylase
211275_s_at	1.49538	0.572838	GYG1	2.61048	NM_004130			205882_x_at	AF087942		tRNA splicing endonuclease 2 homolog (S. cerevisiae)		205882_x_at	ADD3	adducin 3 (gamma)
204162_at	1.58692	0.608765	NDC80	2.60678	NM_006101			205909_at	NM_006101		ribonuclease T2		205909_at	POLE2	polymerase (DNA directed), epsilon 2 (p59 subunit)
201998_at	1.35578	0.520269	ST6GAL1	2.60591	NM_003032 /// NM_173216 /// NM_173217			205928_at	AI743792		G protein-coupled receptor kinase 5		205928_at	ZNF443	zinc finger protein 443
200887_s_at	1.37033	0.52634	STAT1	2.60352	NM_007315 /// NM_139266			205961_s_at	NM_007315		nucleoporin 133kDa		205961_s_at	PSIP1	PC4 and SFRS1 interacting protein 1
201764_at	1.44031	0.553611	TMEM106C	2.60167	NM_024056			205967_at	NM_024056		Desmoglein 2		205967_at	HIST1H4A /// HIST1H4B /// HIST1H4C /// HIST1H4D /// HIST1H4E /// HIST1H4F /// HIST1H4H /// HIST1H4I /// HIST1H4J /// HIST1H4K /// HIST1H4L /// HIST2H4A /// HIST2H4B /// HIST4H4	histone cluster 1, H4i /// histone cluster 1, H4a /// histone cluster 1, H4d /// histone cluster 1, H4f /// histone cluster 1, H4k /// histone cluster 1, H4j /// histone cluster 1, H4c /// histone cluster 1, H4h /// histone cluster 1, H4b /// histone cluster 1, H4e /// histone cluster 1, H4l /// histone cluster 2, H4a /// histone cluster 4, H4 /// histone cluster 2, H4b
219148_at	1.38554	0.532909	PBK	2.59996	NM_018492			205968_at	NM_018492		citron (rho-interacting, serine/threonine kinase 21)		205968_at	KCNS3	potassium voltage-gated channel, delayed-rectifier, subfamily S, member 3
201316_at	1.57906	0.608098	PSMA2	2.59671	NM_002787			206015_s_at	AL523904		KH domain containing, RNA binding, signal transduction associated 1		206015_s_at	FOXJ3	forkhead box J3
202345_s_at	1.73711	0.669751	FABP5 /// FABP5L2 /// FABP5L7	2.59366	NM_001444 /// XM_001127657 /// XM_001128089 /// XM_001132811 /// XM_001134012 /// XM_001718375 /// XM_001721172			206071_s_at	NM_001444		RNA binding motif protein 10		206071_s_at	EPHA3	EPH receptor A3
209586_s_at	1.43016	0.551424	PRUNE	2.59357	NM_021222			206081_at	AF123539		cold inducible RNA binding protein		206081_at	SLC24A1	solute carrier family 24 (sodium/potassium/calcium exchanger), member 1
216883_x_at	1.41761	0.546708	PDE6D	2.59299	NM_002601			206102_at	AJ001626		transmembrane protein 33		206102_at	GINS1	GINS complex subunit 1 (Psf1 homolog)
219512_at	1.68597	0.651013	DSN1	2.58977	NM_024918			206117_at	NM_024918		hypothetical protein LOC257152		206117_at	TPM1	tropomyosin 1 (alpha)
214022_s_at	2.20174	0.851664	IFITM1	2.58522	NM_003641			206167_s_at	AA749101		origin recognition complex, subunit 4-like (yeast)		206167_s_at	ARHGAP6	Rho GTPase activating protein 6
219067_s_at	1.77427	0.68694	NSMCE4A	2.58286	NM_017615			206173_x_at	NM_017615		poly(A) binding protein interacting protein 1		206173_x_at	GABPB2	GA binding protein transcription factor, beta subunit 2
217165_x_at	1.4253	0.55188	MT1F	2.58263	NM_005949			206200_s_at	M10943		BUB3 budding uninhibited by benzimidazoles 3 homolog (yeast)		206200_s_at	ANXA11	annexin A11
218384_at	1.71949	0.66581	CARHSP1	2.58255	NM_001042476 /// NM_014316			206201_s_at	NM_014316		PRP40 pre-mRNA processing factor 40 homolog A (S. cerevisiae)		206201_s_at	MEOX2	mesenchyme homeobox 2
203214_x_at	1.34566	0.521404	CDC2	2.58083	NM_001786 /// NM_033379			206307_s_at	NM_001786		BUB3 budding uninhibited by benzimidazoles 3 homolog (yeast)		206307_s_at	FOXD1	forkhead box D1
219918_s_at	1.38362	0.536182	ASPM	2.5805	NM_018136			206316_s_at	NM_018123		golgi membrane protein 1		206316_s_at	KNTC1	kinetochore associated 1
220129_at	1.52363	0.590587	SOHLH2	2.57985	NM_017826			206364_at	NM_017826		nucleoporin 37kDa		206364_at	KIF14	kinesin family member 14
201302_at	1.27129	0.492804	ANXA4	2.57972	NM_001153			206373_at	NM_001153		plastin 3 (T isoform)		206373_at	ZIC1	Zic family member 1 (odd-paired homolog, Drosophila)
203351_s_at	1.38417	0.536792	ORC4L	2.5786	NM_002552 /// NM_181741 /// NM_181742			206396_at	AF047598		5-aminoimidazole-4-carboxamide ribonucleotide formyltransferase/IMP cyclohydrolase		206396_at	SLC1A1	solute carrier family 1 (neuronal/epithelial high affinity glutamate transporter, system Xag), member 1
200659_s_at	1.46181	0.566915	PHB	2.57854	NM_002634			206414_s_at	NM_002634		nuclear factor of kappa light polypeptide gene enhancer in B-cells inhibitor, alpha		206414_s_at	DDEF2	development and differentiation enhancing factor 2
219311_at	1.50601	0.584165	CEP76	2.57805	NM_024899			206441_s_at	NM_024899		vitamin D (1,25- dihydroxyvitamin D3) receptor		206441_s_at	COMMD4	COMM domain containing 4
201306_s_at	1.5164	0.588522	ANP32B	2.57662	NM_006401			206544_x_at	NM_006401		tumor necrosis factor receptor superfamily, member 21		206544_x_at	SMARCA2	SWI/SNF related, matrix associated, actin dependent regulator of chromatin, subfamily a, member 2
204779_s_at	1.52137	0.590628	HOXB7	2.57585	NM_004502			206550_s_at	NM_004502		retinoblastoma binding protein 8		206550_s_at	NUP155	nucleoporin 155kDa
217786_at	1.5358	0.596254	PRMT5	2.57575	NM_001039619 /// NM_006109			206632_s_at	NM_006109		hyaluronan-mediated motility receptor (RHAMM)		206632_s_at	APOBEC3B	apolipoprotein B mRNA editing enzyme, catalytic polypeptide-like 3B
221711_s_at	1.59176	0.618029	C19orf62	2.57553	NM_001033549 /// NM_014173			206685_at	BC006244		DEAD (Asp-Glu-Ala-Asp) box polypeptide 50		206685_at	HCG4	HLA complex group 4
208166_at	1.80457	0.701868	MMP16	2.57109	NM_005941 /// NM_022564			206746_at	NM_022564		KIAA0090		206746_at	BFSP1	beaded filament structural protein 1, filensin
209780_at	1.42996	0.556188	PHTF2	2.571	NM_020432			206770_s_at	AL136883		metallophosphoesterase domain containing 2		206770_s_at	SLC35A3	solute carrier family 35 (UDP-N-acetylglucosamine (UDP-GlcNAc) transporter), member A3
204973_at	1.81279	0.705403	GJB1	2.56987	NM_000166 /// NM_001097642			206809_s_at	NM_000166		hydroxysteroid (17-beta) dehydrogenase 12		206809_s_at	HNRNPA3 /// HNRNPA3P1	heterogeneous nuclear ribonucleoprotein A3 pseudogene 1 /// heterogeneous nuclear ribonucleoprotein A3
200810_s_at	1.53703	0.598453	CIRBP	2.56834	NM_001280 /// NR_023312 /// NR_023313			207079_s_at	NM_001280		RMI1, RecQ mediated genome instability 1, homolog (S. cerevisiae)		207079_s_at	MED6	mediator complex subunit 6
204354_at	1.24233	0.483835	POT1	2.56768	NM_001042594 /// NM_015450 /// NR_003102 /// NR_003103 /// NR_003104			207124_s_at	NM_015450		polymerase (RNA) II (DNA directed) polypeptide E, 25kDa		207124_s_at	GNB5	guanine nucleotide binding protein (G protein), beta 5
212281_s_at	1.49777	0.583555	TMEM97	2.56663	NM_014573			207165_at	BF038366		poly(A) polymerase alpha		207165_at	HMMR	hyaluronan-mediated motility receptor (RHAMM)
201164_s_at	1.43593	0.559465	PUM1	2.56661	NM_001020658 /// NM_014676			207198_s_at	BG474429		nucleoporin 85kDa		207198_s_at	LIMS1	LIM and senescent cell antigen-like domains 1
205716_at	1.08758	0.424037	SLC25A40	2.56482	NM_018843			207199_at	NM_018843		cell division cycle 37 homolog (S. cerevisiae)		207199_at	TERT	telomerase reverse transcriptase
217957_at	1.40673	0.548934	C16orf80	2.56266	NM_013242			207232_s_at	NM_013242		SET domain containing 2		207232_s_at	DZIP3	DAZ interacting protein 3, zinc finger
211630_s_at	1.69786	0.66269	GSS	2.56207	NM_000178			207405_s_at	L42531		H1 histone family, member 0		207405_s_at	RAD17	RAD17 homolog (S. pombe)
202737_s_at	1.584	0.618371	LSM4	2.56157	NM_012321			207515_s_at	NM_012321		forkhead box O3		207515_s_at	POLR1C	polymerase (RNA) I polypeptide C, 30kDa
217772_s_at	1.36998	0.535193	MTCH2	2.55978	NM_014342			207606_s_at	NM_014342		PDZ and LIM domain 3		207606_s_at	ARHGAP12	Rho GTPase activating protein 12
220892_s_at	1.38204	0.540327	PSAT1	2.55779	NM_021154 /// NM_058179			207828_s_at	NM_021154		MRNA; cDNA DKFZp686K0394 (from clone DKFZp686K0394)		207828_s_at	CENPF	centromere protein F, 350/400ka (mitosin)
209434_s_at	1.82263	0.712607	PPAT	2.5577	NM_002703			207829_s_at	U00238		four jointed box 1 (Drosophila)		207829_s_at	BNIP1	BCL2/adenovirus E1B 19kDa interacting protein 1
219584_at	1.23829	0.484241	PLA1A	2.55718	NM_015900			207831_x_at	NM_015900		zinc finger CCCH-type containing 14		207831_x_at	DHPS	deoxyhypusine synthase
213479_at	1.59452	0.623715	NPTX2	2.55649	NM_002523			207871_s_at	U26662		family with sequence similarity 149, member B1		207871_s_at	ST7	suppression of tumorigenicity 7
214649_s_at	1.39996	0.547834	MTMR2	2.55544	NM_016156 /// NM_201278 /// NM_201281			207891_s_at	U58033		parvin, beta		207891_s_at	TREX2 /// UCHL5IP	three prime repair exonuclease 2 /// UCHL5 interacting protein
212131_at	1.54694	0.605737	LSM14A	2.55382	NM_001114093 /// NM_015578			208022_s_at	BG054966		pyrophosphatase (inorganic) 1		208022_s_at	CDC14B /// CDC14C	CDC14 cell division cycle 14 homolog B (S. cerevisiae) /// CDC14 cell division cycle 14 homolog C (S. cerevisiae)
212621_at	1.47732	0.578995	TMEM194	2.55153	NM_015257			208024_s_at	AB006624		BCL2/adenovirus E1B 19kDa interacting protein 3		208024_s_at	DGCR6 /// DGCR6L	DiGeorge syndrome critical region gene 6 /// DiGeorge syndrome critical region gene 6-like
211569_s_at	1.34046	0.525357	HADH	2.55152	NM_005327			208051_s_at	AF001903		receptor-interacting serine-threonine kinase 4		208051_s_at	PAIP1	poly(A) binding protein interacting protein 1
221258_s_at	1.62199	0.635766	KIF18A	2.55123	NM_031217			208070_s_at	NM_031217		GA binding protein transcription factor, beta subunit 2		208070_s_at	REV3L	REV3-like, catalytic subunit of DNA polymerase zeta (yeast)
202371_at	1.40884	0.552485	TCEAL4	2.55001	NM_001006935 /// NM_001006936 /// NM_001006937 /// NM_024863			208079_s_at	NM_024863		nucleoporin 98kDa		208079_s_at	AURKA	aurora kinase A
201185_at	1.70205	0.667506	HTRA1	2.54986	NM_002775			208112_x_at	NM_002775		deoxyguanosine kinase		208112_x_at	EHD1	EH-domain containing 1
202405_at	1.51085	0.593419	TIAL1	2.54601	NM_001033925 /// NM_003252			208114_s_at	BF432532		phospholipid scramblase 4		208114_s_at	ISG20L2	interferon stimulated exonuclease gene 20kDa-like 2
209377_s_at	1.39918	0.549558	HMGN3	2.54601	NM_004242 /// NM_138730			208130_s_at	AF274949		cullin-associated and neddylation-dissociated 1		208130_s_at	TBXAS1	thromboxane A synthase 1 (platelet, cytochrome P450, family 5, subfamily A)
222077_s_at	1.38629	0.544852	RACGAP1	2.54435	NM_001126103 /// NM_001126104 /// NM_013277			208166_at	AU153848		penta-EF-hand domain containing 1		208166_at	MMP16	matrix metallopeptidase 16 (membrane-inserted)
220298_s_at	1.24404	0.490103	SPATA6	2.53832	NM_019073			208368_s_at	NM_019073		LIM and calponin homology domains 1		208368_s_at	BRCA2	breast cancer 2, early onset
203335_at	1.37803	0.543391	PHYH	2.53597	NM_001037537 /// NM_006214			208393_s_at	NM_006214		proteasome (prosome, macropain) 26S subunit, non-ATPase, 4		208393_s_at	RAD50	RAD50 homolog (S. cerevisiae)
211450_s_at	1.44791	0.571041	MSH6	2.53557	NM_000179			208415_x_at	D89646		methylphosphate capping enzyme		208415_x_at	ING1	inhibitor of growth family, member 1
218974_at	1.8246	0.721076	SOBP	2.53038	NM_018013			208643_s_at	NM_018013		karyopherin alpha 3 (importin alpha 4)		208643_s_at	XRCC5	X-ray repair complementing defective repair in Chinese hamster cells 5 (double-strand-break rejoining; Ku autoantigen, 80kDa)
216064_s_at	1.36417	0.539761	AGA	2.52736	NM_000027			208670_s_at	W27131		chromobox homolog 3 (HP1 gamma homolog, Drosophila) /// similar to chromobox homolog 3		208670_s_at	EID1	EP300 interacting inhibitor of differentiation 1
204773_at	1.52713	0.604305	IL11RA	2.52708	NM_004512 /// NM_147162			208714_at	NM_004512		nucleoporin 62kDa		208714_at	NDUFV1	NADH dehydrogenase (ubiquinone) flavoprotein 1, 51kDa
201445_at	1.48379	0.587274	CNN3	2.52657	NM_001839			208731_at	NM_001839		RAB GTPase activating protein 1		208731_at	RAB2A	RAB2A, member RAS oncogene family
203213_at	1.82484	0.722462	CDC2	2.52587	NM_001786 /// NM_033379			208753_s_at	AL524035		transcription factor-like 5 (basic helix-loop-helix)		208753_s_at	NAP1L1	nucleosome assembly protein 1-like 1
201614_s_at	1.46629	0.580875	RUVBL1	2.52427	NM_003707			208758_at	NM_003707		ATPase family, AAA domain containing 2		208758_at	ATIC	5-aminoimidazole-4-carboxamide ribonucleotide formyltransferase/IMP cyclohydrolase
214061_at	1.38271	0.548065	WDR67	2.5229	NM_145647			208771_s_at	AI017564		PTPRF interacting protein, binding protein 1 (liprin beta 1) /// similar to mKIAA1230 protein		208771_s_at	LTA4H	leukotriene A4 hydrolase
222162_s_at	1.71705	0.681073	ADAMTS1	2.5211	NM_006988			208775_at	AK023795		voltage-dependent anion channel 1 /// similar to Voltage-dependent anion-selective channel protein 1 (VDAC-1) (hVDAC1) (Outer mitochondrial membrane protein porin 1) (Plasmalemmal porin) (Porin 31HL) (Porin 31HM)		208775_at	XPO1	exportin 1 (CRM1 homolog, yeast)
218168_s_at	1.37711	0.546241	CABC1	2.52106	NM_020247			208784_s_at	NM_020247		heat shock 10kDa protein 1 (chaperonin 10)		208784_s_at	KLHDC3	kelch domain containing 3
212061_at	1.2747	0.505649	SR140	2.52092	NM_001080415			208795_s_at	AB002330		McKusick-Kaufman syndrome		208795_s_at	MCM7	minichromosome maintenance complex component 7
63009_at	1.39729	0.555046	SHQ1	2.51744	NM_018130			208808_s_at	AI188402		pantothenate kinase 2 (Hallervorden-Spatz syndrome)		208808_s_at	HMGB2	high-mobility group box 2
218866_s_at	1.47474	0.586273	POLR3K	2.51544	NM_016310			208838_at	NM_016310		butyrophilin, subfamily 3, member A3		208838_at	CAND1	cullin-associated and neddylation-dissociated 1
209837_at	1.32051	0.52498	AP4M1	2.51536	NM_004722			208839_s_at	AF155158		glycoprotein M6B		208839_s_at	CAND1	cullin-associated and neddylation-dissociated 1
213338_at	1.85419	0.737167	TMEM158	2.51529	NM_015444			208847_s_at	BF062629		Ras-related GTP binding D		208847_s_at	ADH5	alcohol dehydrogenase 5 (class III), chi polypeptide
205436_s_at	1.62621	0.646533	H2AFX	2.51527	NM_002105			208848_at	NM_002105		transcription factor A, mitochondrial		208848_at	ADH5	alcohol dehydrogenase 5 (class III), chi polypeptide
210502_s_at	1.4096	0.560512	PPIE	2.51485	NM_006112 /// NM_203456 /// NM_203457			208863_s_at	AF042386		anthrax toxin receptor 1		208863_s_at	SFRS1	splicing factor, arginine/serine-rich 1 (splicing factor 2, alternate splicing factor)
205078_at	1.33419	0.53057	PIGF	2.51463	NM_002643 /// NM_173074			208879_x_at	NM_002643		syntaxin 7		208879_x_at	PRPF6	PRP6 pre-mRNA processing factor 6 homolog (S. cerevisiae)
204332_s_at	1.44351	0.574089	AGA	2.51445	NM_000027			208880_s_at	M64073		topoisomerase (DNA) II binding protein 1		208880_s_at	PRPF6	PRP6 pre-mRNA processing factor 6 homolog (S. cerevisiae)
212949_at	1.65238	0.657268	NCAPH	2.51402	NM_015341			208886_at	D38553		beaded filament structural protein 1, filensin		208886_at	H1F0	H1 histone family, member 0
202169_s_at	1.45099	0.578103	AASDHPPT	2.50991	NM_015423			208897_s_at	AF302110		acireductone dioxygenase 1		208897_s_at	DDX18	DEAD (Asp-Glu-Ala-Asp) box polypeptide 18
218477_at	1.4209	0.566127	TMEM14A	2.50987	NM_014051			208906_at	NM_014051		renal tumor antigen		208906_at	BSCL2 /// HNRNPUL2	Bernardinelli-Seip congenital lipodystrophy 2 (seipin) /// heterogeneous nuclear ribonucleoprotein U-like 2
203418_at	1.45521	0.579848	CCNA2	2.50964	NM_001237			208907_s_at	NM_001237		TAF12 RNA polymerase II, TATA box binding protein (TBP)-associated factor, 20kDa		208907_s_at	MRPS18B	mitochondrial ribosomal protein S18B
213995_at	1.54819	0.61701	ATP5S	2.50918	NM_001003803 /// NM_001003805 /// NM_015684			208932_at	AW195882		mitochondrial ribosomal protein S16		208932_at	PPP4C	protein phosphatase 4 (formerly X), catalytic subunit
205613_at	1.51801	0.605231	SYT17	2.50815	NM_016524			208951_at	NM_016524		peptidylglycine alpha-amidating monooxygenase		208951_at	ALDH7A1	aldehyde dehydrogenase 7 family, member A1
221923_s_at	1.25233	0.499317	NPM1	2.5081	NM_001037738 /// NM_002520 /// NM_199185			208955_at	AA191576		ribonucleotide reductase M1		208955_at	DUT	deoxyuridine triphosphatase
214224_s_at	1.51664	0.604723	PIN4	2.50799	NM_006223			208956_x_at	BE674061		ectonucleotide pyrophosphatase/phosphodiesterase 1		208956_x_at	DUT	deoxyuridine triphosphatase
219203_at	1.49332	0.595799	C14orf122	2.50642	NM_016049			208965_s_at	NM_016049		tubulin folding cofactor B		208965_s_at	IFI16	interferon, gamma-inducible protein 16
202209_at	1.31337	0.524277	LSM3	2.50512	NM_014463			208990_s_at	NM_014463		MAX interactor 1		208990_s_at	HNRNPH3	heterogeneous nuclear ribonucleoprotein H3 (2H9)
217280_x_at	1.45019	0.579465	GABRA5	2.50264	NM_000810 /// XM_001123369			208993_s_at	AF061785		centrosomal protein 57kDa		208993_s_at	PPIG	peptidylprolyl isomerase G (cyclophilin G)
211623_s_at	1.35631	0.542059	FBL	2.50214	NM_001436			209025_s_at	M30448		5-methyltetrahydrofolate-homocysteine methyltransferase reductase		209025_s_at	SYNCRIP	synaptotagmin binding, cytoplasmic RNA interacting protein
202813_at	1.32393	0.529124	TARBP1	2.50212	NM_005646			209030_s_at	NM_005646		centrin, EF-hand protein, 3 (CDC31 homolog, yeast)		209030_s_at	CADM1	cell adhesion molecule 1
202533_s_at	1.60979	0.643567	DHFR	2.50135	NM_000791			209031_at	BC003584		discs, large homolog 1 (Drosophila)		209031_at	CADM1	cell adhesion molecule 1
204224_s_at	1.2842	0.513405	GCH1	2.50135	NM_000161 /// NM_001024024 /// NM_001024070 /// NM_001024071			209033_s_at	NM_000161		melanoregulin		209033_s_at	DYRK1A	dual-specificity tyrosine-(Y)-phosphorylation regulated kinase 1A
219588_s_at	1.49314	0.596991	NCAPG2	2.50111	NM_017760			209040_s_at	NM_017760		ubiquitin specific peptidase 1		209040_s_at	PSMB8	proteasome (prosome, macropain) subunit, beta type, 8 (large multifunctional peptidase 7)
206396_at	1.40546	0.562301	SLC1A1	2.49947	NM_004170			209052_s_at	NM_004170		chromosome 14 open reading frame 1		209052_s_at	WHSC1	Wolf-Hirschhorn syndrome candidate 1
200790_at	1.51326	0.605786	ODC1	2.498	NM_002539			209053_s_at	NM_002539		aldehyde dehydrogenase 7 family, member A1		209053_s_at	WHSC1	Wolf-Hirschhorn syndrome candidate 1
202909_at	1.73993	0.696632	EPM2AIP1	2.49763	NM_014805			209055_s_at	NM_014805		activating transcription factor 1		209055_s_at	CDC5L	CDC5 cell division cycle 5-like (S. pombe)
206632_s_at	1.37724	0.552118	APOBEC3B	2.49447	NM_004900			209056_s_at	NM_004900		solute carrier family 30 (zinc transporter), member 9		209056_s_at	CDC5L	CDC5 cell division cycle 5-like (S. pombe)
219373_at	1.31017	0.525476	DPM3	2.4933	NM_018973 /// NM_153741			209065_at	NM_018973		stress-induced-phosphoprotein 1 (Hsp70/Hsp90-organizing protein)		209065_at	UQCRB	ubiquinol-cytochrome c reductase binding protein
218643_s_at	1.3489	0.54103	CRIPT	2.49322	NM_014171			209085_x_at	NM_014171		Notch homolog 2 (Drosophila) N-terminal like		209085_x_at	RFC1	replication factor C (activator 1) 1, 145kDa
201014_s_at	1.38862	0.557256	PAICS	2.4919	NM_001079524 /// NM_001079525 /// NM_006452			209089_at	NM_006452		zinc finger CCCH-type containing 14		209089_at	RAB5A	RAB5A, member RAS oncogene family
203409_at	1.60242	0.643549	DDB2	2.48998	NM_000107			209093_s_at	NM_000107		BCL2/adenovirus E1B 19kDa interacting protein 1		209093_s_at	GBA /// GBAP	glucosidase, beta; acid (includes glucosylceramidase) /// glucosidase, beta; acid, pseudogene
211933_s_at	1.28381	0.515875	HNRNPA3 /// HNRNPA3P1	2.4886	NM_194247 /// NR_002726			209143_s_at	AA528233		phosphodiesterase 6D, cGMP-specific, rod, delta		209143_s_at	CLNS1A	chloride channel, nucleotide-sensitive, 1A
208955_at	1.57946	0.635166	DUT	2.48668	NM_001025248 /// NM_001025249 /// NM_001948			209162_s_at	AB049113		upstream binding protein 1 (LBP-1a)		209162_s_at	PRPF4	PRP4 pre-mRNA processing factor 4 homolog (yeast)
201345_s_at	1.42499	0.573244	UBE2D2	2.48583	NM_003339 /// NM_181838			209167_at	NM_003339		dihydrolipoamide branched chain transacylase E2		209167_at	GPM6B	glycoprotein M6B
202944_at	1.64218	0.660704	NAGA	2.48549	NM_000262			209169_at	NM_000262		pitrilysin metallopeptidase 1		209169_at	GPM6B	glycoprotein M6B
217960_s_at	1.49747	0.602688	TOMM22	2.48466	NM_020243			209170_s_at	NM_020243		degenerative spermatocyte homolog 1, lipid desaturase (Drosophila)		209170_s_at	GPM6B	glycoprotein M6B
40472_at	1.59622	0.642794	AGPAT7	2.48325	NM_153613			209219_at	AF007155		phosphatidic acid phosphatase type 2B		209219_at	RDBP	RD RNA binding protein
203549_s_at	1.48101	0.596471	LPL	2.48295	NM_000237			209228_x_at	NM_000237		Wolf-Hirschhorn syndrome candidate 2		209228_x_at	TUSC3	tumor suppressor candidate 3
218462_at	1.37764	0.554895	BXDC5	2.4827	NM_025065			209234_at	NM_025065		SEH1-like (S. cerevisiae)		209234_at	KIF1B	kinesin family member 1B
211456_x_at	1.38717	0.55879	MT1P2	2.48246	---			209240_at	AF333388		jumonji domain containing 2D		209240_at	OGT	O-linked N-acetylglucosamine (GlcNAc) transferase (UDP-N-acetylglucosamine:polypeptide-N-acetylglucosaminyl transferase)
203764_at	1.36994	0.551921	DLG7	2.48213	NM_014750			209250_at	NM_014750		deleted in lymphocytic leukemia, 2		209250_at	DEGS1	degenerative spermatocyte homolog 1, lipid desaturase (Drosophila)
207828_s_at	1.35451	0.546087	CENPF	2.48038	NM_016343			209272_at	NM_005196		small nuclear ribonucleoprotein D3 polypeptide 18kDa		209272_at	NAB1	NGFI-A binding protein 1 (EGR1 binding protein 1)
213610_s_at	1.52075	0.613273	KLHL23	2.47973	NM_144711			209281_s_at	BE326381		fibronectin type III and SPRY domain containing 1		209281_s_at	ATP2B1	ATPase, Ca++ transporting, plasma membrane 1
203148_s_at	1.46746	0.591875	TRIM14	2.47934	NM_014788 /// NM_033219 /// NM_033220 /// NM_033221			209288_s_at	NM_014788		histone cluster 1, H4i /// histone cluster 1, H4a /// histone cluster 1, H4d /// histone cluster 1, H4f /// histone cluster 1, H4k /// histone cluster 1, H4j /// histone cluster 1, H4c /// histone cluster 1, H4h /// histone cluster 1, H4b /// histone cluster 1, H4e /// histone cluster 1, H4l /// histone cluster 2, H4a /// histone cluster 4, H4 /// histone cluster 2, H4b		209288_s_at	CDC42EP3	CDC42 effector protein (Rho GTPase binding) 3
219654_at	1.35415	0.546887	PTPLA	2.4761	NM_014241			209296_at	NM_014241		casein kinase 2, alpha 1 polypeptide /// casein kinase 2, alpha 1 polypeptide pseudogene		209296_at	PPM1B	protein phosphatase 1B (formerly 2C), magnesium-dependent, beta isoform
218185_s_at	1.60264	0.647429	ARMC1	2.47539	NM_018120			209306_s_at	NM_018120		epidermal growth factor receptor (erythroblastic leukemia viral (v-erb-b) oncogene homolog, avian)		209306_s_at	SWAP70	SWAP-70 protein
212105_s_at	1.39713	0.564598	DHX9	2.47455	NM_001357			209307_at	BF313832		peroxisome biogenesis factor 1		209307_at	SWAP70	SWAP-70 protein
204023_at	1.42568	0.576379	RFC4	2.47351	NM_002916 /// NM_181573			209313_at	NM_002916		centromere protein A		209313_at	GPN1	GPN-loop GTPase 1
201417_at	1.46203	0.591142	SOX4	2.47324	NM_003107			209337_at	AL136179		WD repeat domain 8		209337_at	PSIP1	PC4 and SFRS1 interacting protein 1
218663_at	1.44781	0.58553	NCAPG	2.47264	NM_022346			209355_s_at	NM_022346		malonyl CoA:ACP acyltransferase (mitochondrial)		209355_s_at	PPAP2B	phosphatidic acid phosphatase type 2B
213998_s_at	1.43235	0.579557	DDX17	2.47146	NM_001098504 /// NM_001098505 /// NM_006386 /// NM_030881			209377_s_at	AW188131		forkhead box D1		209377_s_at	HMGN3	high mobility group nucleosomal binding domain 3
209608_s_at	1.49145	0.603677	ACAT2	2.47062	NM_005891			209394_at	BC000408		transcription factor AP-2 alpha (activating enhancer binding protein 2 alpha)		209394_at	ASMTL	acetylserotonin O-methyltransferase-like
209281_s_at	1.63319	0.661354	ATP2B1	2.46946	NM_001001323 /// NM_001682			209425_at	M95541		KIAA0101		209425_at	AMACR /// C1QTNF3	alpha-methylacyl-CoA racemase /// C1q and tumor necrosis factor related protein 3
212731_at	1.32222	0.535517	ANKRD46	2.46906	NM_198401			209426_s_at	U79297		mitochondrial ribosomal protein S34		209426_s_at	AMACR /// C1QTNF3	alpha-methylacyl-CoA racemase /// C1q and tumor necrosis factor related protein 3
215136_s_at	1.57974	0.639893	EXOSC8	2.46876	NM_181503			209431_s_at	AL050353		solute carrier family 1 (neuronal/epithelial high affinity glutamate transporter, system Xag), member 1		209431_s_at	PATZ1	POZ (BTB) and AT hook containing zinc finger 1
218557_at	1.53854	0.623943	NIT2	2.46583	NM_020202			209433_s_at	NM_020202		ubiquitin specific peptidase 13 (isopeptidase T-3)		209433_s_at	PPAT	phosphoribosyl pyrophosphate amidotransferase
203979_at	1.4628	0.593248	CYP27A1	2.46575	NM_000784			209434_s_at	NM_000784		tubulin, delta 1		209434_s_at	PPAT	phosphoribosyl pyrophosphate amidotransferase
221984_s_at	1.5444	0.626546	FAM134A	2.46495	NM_024293			209452_s_at	AL040896		LSM4 homolog, U6 small nuclear RNA associated (S. cerevisiae)		209452_s_at	VTI1B	vesicle transport through interaction with t-SNAREs homolog 1B (yeast)
202309_at	1.28359	0.520791	MTHFD1	2.4647	NM_005956			209459_s_at	NM_005956		BUB1 budding uninhibited by benzimidazoles 1 homolog beta (yeast)		209459_s_at	ABAT	4-aminobutyrate aminotransferase
213330_s_at	1.42851	0.57982	STIP1	2.46371	NM_006819			209463_s_at	BE886580		IMP3, U3 small nucleolar ribonucleoprotein, homolog (yeast)		209463_s_at	TAF12	TAF12 RNA polymerase II, TATA box binding protein (TBP)-associated factor, 20kDa
205542_at	1.48669	0.603448	STEAP1	2.46366	NM_012449			209478_at	NM_012449		aldehyde dehydrogenase 5 family, member A1 (succinate-semialdehyde dehydrogenase)		209478_at	STRA13	stimulated by retinoic acid 13 homolog (mouse)
201855_s_at	1.26538	0.513684	ATMIN	2.46334	NM_015251			209507_at	NM_015251		N-acetyltransferase 10		209507_at	RPA3	replication protein A3, 14kDa
219104_at	1.27909	0.519743	RNF141	2.461	NM_016422			209520_s_at	NM_016422		heterogeneous nuclear ribonucleoprotein A3		209520_s_at	NCBP1	nuclear cap binding protein subunit 1, 80kDa
217286_s_at	1.36143	0.553277	HNRNPA3P2 /// NDRG3	2.46066	NM_022477 /// NM_032013			209527_at	BC001805		prenylcysteine oxidase 1 like		209527_at	EXOSC2	exosome component 2
218953_s_at	1.30787	0.531895	PCYOX1L	2.45889	NM_024028			209549_s_at	NM_024028		NDRG family member 3 /// heterogeneous nuclear ribonucleoprotein A3 pseudogene 2		209549_s_at	DGUOK	deoxyguanosine kinase
211932_at	1.2914	0.525319	HNRNPA3	2.45832	NM_194247			209565_at	BF195526		ring finger protein 141		209565_at	RNF113A	ring finger protein 113A
217884_at	1.36007	0.553313	NAT10	2.45805	NM_024662			209566_at	NM_024662		ATM interactor		209566_at	INSIG2	insulin induced gene 2
203608_at	1.29282	0.525976	ALDH5A1	2.45795	NM_001080 /// NM_170740			209572_s_at	AL031230		six transmembrane epithelial antigen of the prostate 1		209572_s_at	EED	embryonic ectoderm development
221688_s_at	1.53029	0.62261	IMP3	2.45786	NM_018285			209586_s_at	AL136913		stress-induced-phosphoprotein 1 (Hsp70/Hsp90-organizing protein)		209586_s_at	PRUNE	prune homolog (Drosophila)
203755_at	1.4719	0.598956	BUB1B	2.45744	NM_001211			209608_s_at	NM_001211		methylenetetrahydrofolate dehydrogenase (NADP+ dependent) 1, methenyltetrahydrofolate cyclohydrolase, formyltetrahydrofolate synthetase		209608_s_at	ACAT2	acetyl-Coenzyme A acetyltransferase 2
202736_s_at	1.54385	0.628623	LSM4	2.45593	NM_012321			209620_s_at	AA112507		family with sequence similarity 134, member A		209620_s_at	ABCB7	ATP-binding cassette, sub-family B (MDR/TAP), member 7
221326_s_at	1.22915	0.500495	TUBD1	2.45586	NM_016261			209621_s_at	NM_016261		cytochrome P450, family 27, subfamily A, polypeptide 1		209621_s_at	PDLIM3	PDZ and LIM domain 3
205356_at	1.39173	0.566902	USP13	2.45497	NM_003940			209630_s_at	NM_003940		nitrilase family, member 2		209630_s_at	FBXW2	F-box and WD repeat domain containing 2
213664_at	1.46916	0.598458	SLC1A1	2.4549	NM_004170			209662_at	AW235061		exosome component 8		209662_at	CETN3	centrin, EF-hand protein, 3 (CDC31 homolog, yeast)
218112_at	1.59123	0.648206	MRPS34	2.45482	NM_023936			209707_at	NM_023936		ankyrin repeat domain 46		209707_at	PIGK	phosphatidylinositol glycan anchor biosynthesis, class K
202503_s_at	1.35543	0.552241	KIAA0101	2.45441	NM_001029989 /// NM_014736			209709_s_at	NM_014736		ATPase, Ca++ transporting, plasma membrane 1		209709_s_at	HMMR	hyaluronan-mediated motility receptor (RHAMM)
204653_at	1.45345	0.592787	TFAP2A	2.45189	NM_001032280 /// NM_001042425 /// NM_003220			209714_s_at	BF343007		acetyl-Coenzyme A acetyltransferase 2		209714_s_at	CDKN3	cyclin-dependent kinase inhibitor 3 (CDK2-associated dual specificity phosphatase)
206307_s_at	1.17793	0.480861	FOXD1	2.44962	NM_004472			209715_at	NM_004472		DEAD (Asp-Glu-Ala-Asp) box polypeptide 17		209715_at	CBX5	chromobox homolog 5 (HP1 alpha homolog, Drosophila)
213132_s_at	1.46391	0.597942	MCAT	2.44824	NM_014507 /// NM_173467			209754_s_at	AL022237		non-SMC condensin I complex, subunit G		209754_s_at	TMPO	thymopoietin
219322_s_at	1.37094	0.560074	WDR8	2.44779	NM_017818			209759_s_at	NM_017818		SRY (sex determining region Y)-box 4		209759_s_at	DCI	dodecenoyl-Coenzyme A delta isomerase (3,2 trans-enoyl-Coenzyme A isomerase)
204962_s_at	1.41001	0.576176	CENPA	2.44718	NM_001042426 /// NM_001809			209773_s_at	NM_001809		replication factor C (activator 1) 4, 37kDa		209773_s_at	RRM2	ribonucleotide reductase M2 polypeptide
204873_at	1.61682	0.66141	PEX1	2.4445	NM_000466			209780_at	NM_000466		DEAH (Asp-Glu-Ala-His) box polypeptide 9		209780_at	PHTF2	putative homeodomain transcription factor 2
201983_s_at	1.49047	0.610124	EGFR	2.44289	NM_005228 /// NM_201282 /// NM_201283 /// NM_201284			209790_s_at	AW157070		armadillo repeat containing 1		209790_s_at	CASP6	caspase 6, apoptosis-related cysteine peptidase
212073_at	1.51656	0.621771	CSNK2A1 /// CSNK2A1P	2.4391	NM_001895 /// NM_177559 /// NM_177560 /// NR_002207			209798_at	AI631874		protein tyrosine phosphatase-like (proline instead of catalytic arginine), member A		209798_at	NPAT	nuclear protein, ataxia-telangiectasia locus
205967_at	1.5577	0.639796	HIST1H4A /// HIST1H4B /// HIST1H4C /// HIST1H4D /// HIST1H4E /// HIST1H4F /// HIST1H4H /// HIST1H4I /// HIST1H4J /// HIST1H4K /// HIST1H4L /// HIST2H4A /// HIST2H4B /// HIST4H4	2.43468	NM_001034077 /// NM_003495 /// NM_003538 /// NM_003539 /// NM_003540 /// NM_003541 /// NM_003542 /// NM_003543 /// NM_003544 /// NM_003545 /// NM_003546 /// NM_003548 /// NM_021968 /// NM_175054			209837_at	NM_003542		tripartite motif-containing 14		209837_at	AP4M1	adaptor-related protein complex 4, mu 1 subunit
219170_at	1.6328	0.670835	FSD1	2.43398	NM_024333			209846_s_at	NM_024333		kelch-like 23 (Drosophila)		209846_s_at	BTN3A2	butyrophilin, subfamily 3, member A2
202567_at	1.66946	0.686097	SNRPD3	2.43327	NM_004175			209849_s_at	NM_004175		centromere protein F, 350/400ka (mitosin)		209849_s_at	RAD51C	RAD51 homolog C (S. cerevisiae)
216870_x_at	1.42334	0.585265	DLEU2	2.43195	NR_002612			209862_s_at	AF264787		discs, large homolog 7 (Drosophila)		209862_s_at	CEP57	centrosomal protein 57kDa
220278_at	1.44448	0.594307	JMJD2D	2.43053	NM_018039			209896_s_at	NM_018039		metallothionein 1 pseudogene 2		209896_s_at	PTPN11	protein tyrosine phosphatase, non-receptor type 11 (Noonan syndrome 1)
221931_s_at	1.36322	0.561153	SEH1L	2.42932	NM_001013437 /// NM_031216			209902_at	AV701173		brix domain containing 5		209902_at	ATR	ataxia telangiectasia and Rad3 related
34225_at	1.28859	0.530444	WHSC2	2.42927	NM_005663			209932_s_at	AF101434		lipoprotein lipase		209932_s_at	DUT	deoxyuridine triphosphatase
209355_s_at	1.48153	0.61075	PPAP2B	2.42576	NM_003713 /// NM_177414			209953_s_at	AB000889		1-acylglycerol-3-phosphate O-acyltransferase 7 (lysophosphatidic acid acyltransferase, eta)		209953_s_at	CDC37	cell division cycle 37 homolog (S. cerevisiae)
209250_at	1.34018	0.552525	DEGS1	2.42556	NM_003676 /// NM_144780			209967_s_at	BC000961		translocase of outer mitochondrial membrane 22 homolog (yeast)		209967_s_at	CREM	cAMP responsive element modulator
205273_s_at	1.43043	0.5901	PITRM1	2.42404	NM_014889			209980_s_at	NM_014968		N-acetylgalactosaminidase, alpha-		209980_s_at	SHMT1	serine hydroxymethyltransferase 1 (soluble)
205369_x_at	1.3253	0.546943	DBT	2.42311	NM_001918			210052_s_at	J03208		ubiquitin-conjugating enzyme E2D 2 (UBC4/5 homolog, yeast)		210052_s_at	TPX2	TPX2, microtubule-associated, homolog (Xenopus laevis)
218082_s_at	1.51918	0.627173	UBP1	2.42226	NM_014517			210053_at	NM_014517		deoxyuridine triphosphatase		210053_at	TAF5	TAF5 RNA polymerase II, TATA box binding protein (TBP)-associated factor, 100kDa
204091_at	1.43086	0.590721	PDE6D	2.42222	NM_002601			210073_at	NM_002601		heterogeneous nuclear ribonucleoprotein A3 pseudogene 1 /// heterogeneous nuclear ribonucleoprotein A3		210073_at	ST8SIA1	ST8 alpha-N-acetyl-neuraminide alpha-2,8-sialyltransferase 1
204930_s_at	1.29839	0.536073	BNIP1	2.42204	NM_001205 /// NM_013978 /// NM_013979 /// NM_013980			210093_s_at	NM_013979		damage-specific DNA binding protein 2, 48kDa		210093_s_at	MAGOH	mago-nashi homolog, proliferation-associated (Drosophila)
213064_at	1.4397	0.594424	ZC3H14	2.42201	NM_024824 /// NM_207660 /// NM_207661 /// NM_207662			210139_s_at	N64802		phosphoribosylaminoimidazole carboxylase, phosphoribosylaminoimidazole succinocarboxamide synthetase		210139_s_at	PMP22	peripheral myelin protein 22
214722_at	1.41872	0.586139	NOTCH2NL	2.42045	NM_203458			210147_at	AW516297		cysteine-rich PDZ-binding protein		210147_at	ART3	ADP-ribosyltransferase 3
212009_s_at	1.48017	0.611539	STIP1	2.4204	NM_006819			210233_at	AL553320		dolichyl-phosphate mannosyltransferase polypeptide 3		210233_at	IL1RAP	interleukin 1 receptor accessory protein
202614_at	1.17513	0.48568	SLC30A9	2.41956	NM_006345			210239_at	NM_006345		apolipoprotein B mRNA editing enzyme, catalytic polypeptide-like 3B		210239_at	IRX5	iroquois homeobox 5
222103_at	1.4347	0.593175	ATF1	2.41868	NM_005171			210250_x_at	AI434345		EPM2A (laforin) interacting protein 1		210250_x_at	ADSL	adenylosuccinate lyase
213591_at	1.63388	0.676211	ALDH7A1	2.41623	NM_001182			210389_x_at	AU149534		ornithine decarboxylase 1		210389_x_at	TUBD1	tubulin, delta 1
202562_s_at	1.50752	0.624357	C14orf1	2.41452	NM_007176			210410_s_at	AL136658		solute carrier family 1 (neuronal/epithelial high affinity glutamate transporter, system Xag), member 1		210410_s_at	C6orf26 /// MSH5	mutS homolog 5 (E. coli) /// chromosome 6 open reading frame 26
202412_s_at	1.32889	0.550511	USP1	2.41392	NM_001017415 /// NM_001017416 /// NM_003368			210460_s_at	AW499935		non-SMC condensin II complex, subunit G2		210460_s_at	PSMD4	proteasome (prosome, macropain) 26S subunit, non-ATPase, 4
219648_at	1.32672	0.549934	MREG	2.41251	NM_018000			210480_s_at	NM_018000		GTP cyclohydrolase 1 (dopa-responsive dystonia)		210480_s_at	MYO6	myosin VI
202514_at	1.37237	0.569119	DLG1	2.41139	NM_001098424 /// NM_004087			210502_s_at	AW139131		dihydrofolate reductase		210502_s_at	PPIE	peptidylprolyl isomerase E (cyclophilin E)
209662_at	1.32778	0.550939	CETN3	2.41002	NM_004365			210534_s_at	BC005383		TAR (HIV-1) RNA binding protein 1		210534_s_at	B9D1	B9 protein domain 1
203200_s_at	1.32241	0.549117	MTRR	2.40824	NM_002454 /// NM_024010			210559_s_at	NM_024010		fibrillarin		210559_s_at	CDC2	cell division cycle 2, G1 to S and G2 to M
203494_s_at	1.33512	0.554887	CEP57	2.40612	NM_014679			210589_s_at	NM_014679		gamma-aminobutyric acid (GABA) A receptor, alpha 5		210589_s_at	GBA /// GBAP	glucosidase, beta; acid (includes glucosylceramidase) /// glucosidase, beta; acid, pseudogene
202364_at	1.35204	0.561952	MXI1	2.40598	NM_001008541 /// NM_005962 /// NM_130439			210645_s_at	NM_005962		LSM3 homolog, U6 small nuclear RNA associated (S. cerevisiae)		210645_s_at	TTC3	tetratricopeptide repeat domain 3
216194_s_at	1.76998	0.73626	TBCB	2.40402	NM_001281			210655_s_at	AD001527		chromosome 14 open reading frame 122		210655_s_at	FOXO3	forkhead box O3
205066_s_at	1.38673	0.577045	ENPP1	2.40316	NM_006208			210762_s_at	NM_006208		protein (peptidylprolyl cis/trans isomerase) NIMA-interacting, 4 (parvulin)		210762_s_at	DLC1	deleted in liver cancer 1
201477_s_at	1.56283	0.650335	RRM1	2.40312	NM_001033			210793_s_at	NM_001033		nucleophosmin (nucleolar phosphoprotein B23, numatrin)		210793_s_at	NUP98	nucleoporin 98kDa
202336_s_at	1.36444	0.568199	PAM	2.40135	NM_000919 /// NM_138766 /// NM_138821 /// NM_138822			210835_s_at	NM_000919		synaptotagmin XVII		210835_s_at	CTBP2	C-terminal binding protein 2
218046_s_at	1.45035	0.604083	MRPS16	2.40091	NM_016065			210983_s_at	NM_016065		ATP synthase, H+ transporting, mitochondrial F0 complex, subunit s (factor B)		210983_s_at	MCM7	minichromosome maintenance complex component 7
209463_s_at	1.33367	0.555551	TAF12	2.40062	NM_005644			210994_x_at	D50544		cyclin A2		210994_x_at	TRIM23	tripartite motif-containing 23
205130_at	1.57827	0.657533	RAGE	2.40028	NM_014226			210997_at	NM_014226		transmembrane protein 14A		210997_at	HGF	hepatocyte growth factor (hepapoietin A; scatter factor)
217761_at	1.64558	0.685987	ADI1	2.39884	NM_018269			211023_at	NM_018269		aminoadipate-semialdehyde dehydrogenase-phosphopantetheinyl transferase		211023_at	PDHB	pyruvate dehydrogenase (lipoamide) beta
206746_at	1.48858	0.620899	BFSP1	2.39747	NM_001195			211043_s_at	NM_001195		non-SMC condensin I complex, subunit H		211043_s_at	CLTB	clathrin, light chain (Lcb)
202633_at	1.34643	0.561644	TOPBP1	2.3973	NM_007027			211075_s_at	NM_007027		aspartylglucosaminidase		211075_s_at	CD47	CD47 molecule
212631_at	1.32208	0.551576	STX7	2.39692	NM_003569			211115_x_at	AI566082		phosphatidylinositol glycan anchor biosynthesis, class F		211115_x_at	SIP1	survival of motor neuron protein interacting protein 1
220092_s_at	1.63265	0.681171	ANTXR1	2.39683	NM_018153 /// NM_032208 /// NM_053034			211275_s_at	NM_018153		peptidylprolyl isomerase E (cyclophilin E)		211275_s_at	GYG1	glycogenin 1
203177_x_at	1.33222	0.555953	TFAM	2.39627	NM_003201			211285_s_at	NM_003201		H2A histone family, member X		211285_s_at	UBE3A	ubiquitin protein ligase E3A (human papilloma virus E6-associated protein, Angelman syndrome)
221524_s_at	1.40963	0.588537	RRAGD	2.39515	NM_021244			211370_s_at	AF272036		transmembrane protein 158		211370_s_at	MAP2K5	mitogen-activated protein kinase kinase 5
209169_at	1.49624	0.625239	GPM6B	2.39307	NM_001001994 /// NM_001001995 /// NM_001001996 /// NM_005278			211450_s_at	N63576		adaptor-related protein complex 4, mu 1 subunit		211450_s_at	MSH6	mutS homolog 6 (E. coli)
38241_at	1.37408	0.574283	BTN3A3	2.39269	NM_006994 /// NM_197974			211456_x_at	U90548		polymerase (RNA) III (DNA directed) polypeptide K, 12.3 kDa		211456_x_at	MT1P2	metallothionein 1 pseudogene 2
218809_at	1.31816	0.550939	PANK2	2.39257	NM_024960 /// NM_153638 /// NM_153640			211519_s_at	NM_024960		SHQ1 homolog (S. cerevisiae)		211519_s_at	KIF2C	kinesin family member 2C
218138_at	1.61266	0.674612	MKKS	2.3905	NM_018848 /// NM_170784			211558_s_at	NM_018848		U2-associated SR140 protein		211558_s_at	DHPS	deoxyhypusine synthase
205133_s_at	1.38569	0.580084	HSPE1	2.38877	NM_002157			211566_x_at	NM_002157		chaperone, ABC1 activity of bc1 complex homolog (S. pombe)		211566_x_at	BRE	brain and reproductive organ-expressed (TNFRSF1A modulator)
217140_s_at	1.38562	0.580588	LOC100132302 /// VDAC1	2.38659	NM_003374 /// XR_038899			211569_s_at	AJ002428		ADAM metallopeptidase with thrombospondin type 1 motif, 1		211569_s_at	HADH	hydroxyacyl-Coenzyme A dehydrogenase
214375_at	1.14283	0.478953	LOC729222 /// PPFIBP1	2.38611	NM_003622 /// NM_177444 /// XR_015484 /// XR_037707 /// XR_037871			211571_s_at	AI962377		WD repeat domain 67		211571_s_at	VCAN	versican
218782_s_at	1.37868	0.57817	ATAD2	2.38456	NM_014109			211609_x_at	NM_014109		RuvB-like 1 (E. coli)		211609_x_at	PSMD4	proteasome (prosome, macropain) 26S subunit, non-ATPase, 4
204849_at	1.37051	0.574878	TCFL5	2.384	NM_006602			211615_s_at	NM_006602		cell division cycle 2, G1 to S and G2 to M		211615_s_at	LRPPRC	leucine-rich PPR-motif containing
204028_s_at	1.36295	0.571864	RABGAP1	2.38335	NM_012197			211623_s_at	NM_012197		calponin 3, acidic		211623_s_at	FBL	fibrillarin
202153_s_at	1.86146	0.781085	NUP62	2.38317	NM_012346 /// NM_016553 /// NM_153718 /// NM_153719			211630_s_at	NM_016553		interleukin 11 receptor, alpha		211630_s_at	GSS	glutathione synthetase
200037_s_at	1.46233	0.61377	CBX3 /// LOC653972	2.38254	NM_007276 /// NM_016587 /// XM_938779			211675_s_at	NM_016587		aspartylglucosaminidase		211675_s_at	MDFIC	MyoD family inhibitor domain containing
221502_at	1.40417	0.58945	KPNA3	2.38217	NM_002267			211713_x_at	AL120704		sine oculis binding protein homolog (Drosophila)		211713_x_at	KIAA0101	KIAA0101
219798_s_at	1.42223	0.59713	MEPCE	2.38178	NM_019606			211759_x_at	NM_019606		mutS homolog 6 (E. coli)		211759_x_at	TBCB	tubulin folding cofactor B
210460_s_at	1.36681	0.574188	PSMD4	2.38043	NM_002810			211761_s_at	AB033605		phytanoyl-CoA 2-hydroxylase		211761_s_at	CACYBP	calcyclin binding protein
212328_at	1.2897	0.542007	LIMCH1	2.37949	NM_001112717 /// NM_001112718 /// NM_001112719 /// NM_001112720 /// NM_014988			211814_s_at	AB029025		spermatogenesis associated 6		211814_s_at	CCNE2	cyclin E2
217923_at	1.42008	0.597411	PEF1	2.37705	NM_012392			211833_s_at	NM_012392		Rac GTPase activating protein 1		211833_s_at	BAX	BCL2-associated X protein
208838_at	1.63563	0.688383	CAND1	2.37604	NM_018448			211932_at	AB020636		high mobility group nucleosomal binding domain 3		211932_at	HNRNPA3	heterogeneous nuclear ribonucleoprotein A3
218901_at	1.42605	0.600538	PLSCR4	2.37462	NM_020353			211933_s_at	NM_020353		TIA1 cytotoxic granule-associated RNA binding protein-like 1		211933_s_at	HNRNPA3 /// HNRNPA3P1	heterogeneous nuclear ribonucleoprotein A3 pseudogene 1 /// heterogeneous nuclear ribonucleoprotein A3
209549_s_at	1.54907	0.652526	DGUOK	2.37396	NM_080916 /// NM_080918			212008_at	BC001121		HtrA serine peptidase 1		212008_at	UBXD2	UBX domain containing 2
210793_s_at	1.67336	0.705055	NUP98	2.37338	NM_005387 /// NM_016320 /// NM_139131 /// NM_139132			212009_s_at	U41815		transcription elongation factor A (SII)-like 4		212009_s_at	STIP1	stress-induced-phosphoprotein 1 (Hsp70/Hsp90-organizing protein)
204618_s_at	1.32358	0.557807	GABPB2	2.37283	NM_002041 /// NM_005254 /// NM_016654 /// NM_016655 /// NM_181427			212033_at	NM_005254		kinesin family member 18A		212033_at	RBM25	RNA binding motif protein 25
221215_s_at	1.51558	0.639058	RIPK4	2.37158	NM_020639			212037_at	NM_020639		hydroxyacyl-Coenzyme A dehydrogenase		212037_at	PNN	pinin, desmosome associated protein
201849_at	1.65053	0.69651	BNIP3	2.36972	NM_004052			212045_at	NM_004052		transmembrane protein 194		212045_at	GLG1	golgi apparatus protein 1
217848_s_at	1.40615	0.593424	PPA1	2.36955	NM_021129			212046_x_at	NM_021129		LSM14A, SCD6 homolog A (S. cerevisiae)		212046_x_at	MAPK3	mitogen-activated protein kinase 3
37966_at	1.48555	0.626957	PARVB	2.36946	NM_001003828 /// NM_013327			212061_at	AA187563		myotubularin related protein 2		212061_at	SR140	U2-associated SR140 protein
213896_x_at	1.41566	0.597468	FAM149B1	2.36943	XM_001721910 /// XM_001722273 /// XM_001723052			212073_at	BE856549		neuronal pentraxin II		212073_at	CSNK2A1 /// CSNK2A1P	casein kinase 2, alpha 1 polypeptide /// casein kinase 2, alpha 1 polypeptide pseudogene
204216_s_at	1.38484	0.584615	ZC3H14	2.3688	NM_024824 /// NM_207660 /// NM_207661 /// NM_207662			212075_s_at	NM_024824		phospholipase A1 member A		212075_s_at	CSNK2A1	casein kinase 2, alpha 1 polypeptide
219522_at	1.66976	0.705321	FJX1	2.36737	NM_014344			212105_s_at	NM_014344		phosphoribosyl pyrophosphate amidotransferase		212105_s_at	DHX9	DEAH (Asp-Glu-Ala-His) box polypeptide 9
222275_at	1.42589	0.602836	---	2.3653	---			212131_at	AI039469		phosphoserine aminotransferase 1		212131_at	LSM14A	LSM14A, SCD6 homolog A (S. cerevisiae)
209621_s_at	1.73217	0.732818	PDLIM3	2.36371	NM_001114107 /// NM_014476			212138_at	AF002280		mitochondrial carrier homolog 2 (C. elegans)		212138_at	PDS5A	PDS5, regulator of cohesion maintenance, homolog A (S. cerevisiae)
210655_s_at	1.25832	0.532466	FOXO3	2.36319	NM_001455 /// NM_201559			212141_at	AF041336		LSM4 homolog, U6 small nuclear RNA associated (S. cerevisiae)		212141_at	MCM4	minichromosome maintenance complex component 4
208886_at	1.51062	0.6393	H1F0	2.36293	NM_005318			212154_at	BC000145		glutathione synthetase		212154_at	SDC2	syndecan 2
212493_s_at	1.647	0.697472	SETD2	2.36138	NM_014159			212158_at	AI761110		chromosome 16 open reading frame 80		212158_at	SDC2	syndecan 2
209953_s_at	1.67816	0.71089	CDC37	2.36064	NM_007065			212206_s_at	U63131		solute carrier family 25, member 40		212206_s_at	H2AFV	H2A histone family, member V
218014_at	1.3998	0.593193	NUP85	2.35977	NM_024844			212221_x_at	NM_024844		pumilio homolog 1 (Drosophila)		212221_x_at	IDS	iduronate 2-sulfatase (Hunter syndrome)
212720_at	1.48214	0.628098	PAPOLA	2.35973	NM_032632			212226_s_at	AI670847		transmembrane protein 97		212226_s_at	PPAP2B	phosphatidic acid phosphatase type 2B
217854_s_at	1.37477	0.582659	POLR2E	2.35948	NM_002695			212228_s_at	NM_002695		POT1 protection of telomeres 1 homolog (S. pombe)		212228_s_at	COQ9	coenzyme Q9 homolog (S. cerevisiae)
218979_at	1.49719	0.634595	RMI1	2.35929	NM_024945			212229_s_at	NM_024945		cold inducible RNA binding protein		212229_s_at	FBXO21	F-box protein 21
217869_at	1.27677	0.54131	HSD17B12	2.35867	NM_016142			212264_s_at	NM_016142		gap junction protein, beta 1, 32kDa		212264_s_at	WAPAL	wings apart-like homolog (Drosophila)
205413_at	1.21777	0.516393	MPPED2	2.35821	NM_001584			212265_at	NM_001584		putative homeodomain transcription factor 2		212265_at	QKI	quaking homolog, KH domain RNA binding (mouse)
212396_s_at	1.49427	0.633847	KIAA0090	2.35746	NM_015047			212279_at	AI143233		matrix metallopeptidase 16 (membrane-inserted)		212279_at	TMEM97	transmembrane protein 97
221699_s_at	1.51065	0.640969	DDX50	2.35683	NM_024045			212281_s_at	AF334103		chromosome 19 open reading frame 62		212281_s_at	TMEM97	transmembrane protein 97
207165_at	1.36109	0.5777	HMMR	2.35605	NM_012484 /// NM_012485			212282_at	NM_012485		protein arginine methyltransferase 5		212282_at	TMEM97	transmembrane protein 97
203344_s_at	1.40932	0.598871	RBBP8	2.35329	NM_002894 /// NM_203291 /// NM_203292			212299_at	NM_002894		homeobox B7		212299_at	NEK9	NIMA (never in mitosis gene a)- related kinase 9
218856_at	1.42251	0.604589	TNFRSF21	2.35286	NM_014452			212312_at	NM_016629		acidic (leucine-rich) nuclear phosphoprotein 32 family, member B		212312_at	BCL2L1	BCL2-like 1
204254_s_at	1.97791	0.840788	VDR	2.35245	NM_000376 /// NM_001017535			212328_at	NM_000376		centrosomal protein 76kDa		212328_at	LIMCH1	LIM and calponin homology domains 1
201502_s_at	1.55531	0.661171	NFKBIA	2.35236	NM_020529			212368_at	AI078167		prohibitin		212368_at	ZNF292	zinc finger protein 292
208758_at	1.34054	0.569921	ATIC	2.35215	NM_004044			212396_s_at	D89976		origin recognition complex, subunit 4-like (yeast)		212396_s_at	KIAA0090	KIAA0090
201215_at	1.25755	0.534837	PLS3	2.35128	NM_005032			212402_at	NM_005032		annexin A4		212402_at	ZC3H13	zinc finger CCCH-type containing 13
218622_at	1.29174	0.549684	NUP37	2.34997	NM_024057			212405_s_at	NM_024057		spermatogenesis and oogenesis specific basic helix-loop-helix 2		212405_s_at	KIAA0859	KIAA0859
217771_at	1.47148	0.626277	GOLM1	2.34956	NM_016548 /// NM_177937			212408_at	NM_016548		asp (abnormal spindle) homolog, microcephaly associated (Drosophila)		212408_at	TOR1AIP1	torsin A interacting protein 1
201456_s_at	1.56592	0.667051	BUB3	2.34753	NM_001007793 /// NM_004725			212414_s_at	AU160695		cell division cycle 2, G1 to S and G2 to M		212414_s_at	N-PAC /// SEPT6	septin 6 /// cytokine-like nuclear factor n-pac
213729_at	1.34345	0.572395	PRPF40A	2.34708	NM_017892			212432_at	Z78308		calcium regulated heat stable protein 1, 24kDa		212432_at	GRPEL1	GrpE-like 1, mitochondrial (E. coli)
201458_s_at	1.53997	0.656273	BUB3	2.34655	NM_001007793 /// NM_004725			212493_s_at	NM_004725		metallothionein 1F		212493_s_at	SETD2	SET domain containing 2
208051_s_at	1.4997	0.639443	PAIP1	2.34532	NM_006451 /// NM_182789 /// NM_183323			212499_s_at	NM_006451		non-SMC element 4 homolog A (S. cerevisiae)		212499_s_at	FCF1 /// MAPK1IP1L	FCF1 small subunit (SSU) processome component homolog (S. cerevisiae) /// mitogen-activated protein kinase 1 interacting protein 1-like
203352_at	1.95121	0.832523	ORC4L	2.34373	NM_002552 /// NM_181741 /// NM_181742			212506_at	NM_002552		interferon induced transmembrane protein 1 (9-27)		212506_at	PICALM	phosphatidylinositol binding clathrin assembly protein
215302_at	1.38777	0.592242	LOC257152	2.34324	---			212533_at	AU150691		DSN1, MIND kinetochore complex component, homolog (S. cerevisiae)		212533_at	WEE1	WEE1 homolog (S. pombe)
218465_at	1.19765	0.511354	TMEM33	2.34213	NM_018126			212560_at	NM_018126		phosphodiesterase 6D, cGMP-specific, rod, delta		212560_at	SORL1	sortilin-related receptor, L(DLR class) A repeats-containing
200811_at	1.6896	0.721611	CIRBP	2.34142	NM_001280 /// NR_023312 /// NR_023313			212596_s_at	NM_001280		prune homolog (Drosophila)		212596_s_at	HMG2L1	high-mobility group protein 2-like 1
217221_x_at	1.36217	0.581862	RBM10	2.34105	NM_005676 /// NM_152856			212621_at	AL137421		fatty acid binding protein 5 (psoriasis-associated) /// fatty acid binding protein 5-like 7 /// fatty acid binding protein 5-like 2		212621_at	TMEM194	transmembrane protein 194
200040_at	1.32062	0.564136	KHDRBS1	2.34096	NM_006559			212627_s_at	NM_006559		proteasome (prosome, macropain) subunit, alpha type, 2		212627_s_at	EXOSC7	exosome component 7
212801_at	1.46295	0.624976	CIT	2.34082	NM_007174			212631_at	AI861788		PDZ binding kinase		212631_at	STX7	syntaxin 7
217901_at	1.28754	0.55006	DSG2	2.34073	NM_001943			212643_at	BF031829		transmembrane protein 106C		212643_at	MAPK1IP1L	mitogen-activated protein kinase 1 interacting protein 1-like
202184_s_at	1.40447	0.600334	NUP133	2.33949	NM_018230			212645_x_at	NM_018230		signal transducer and activator of transcription 1, 91kDa		212645_x_at	BRE	brain and reproductive organ-expressed (TNFRSF1A modulator)
204396_s_at	1.50251	0.642346	GRK5	2.33909	NM_005308			212675_s_at	NM_005308		ST6 beta-galactosamide alpha-2,6-sialyltranferase 1		212675_s_at	CEP68	centrosomal protein 68kDa
217984_at	1.36639	0.584433	RNASET2	2.33797	NM_003730			212677_s_at	NM_003730		NDC80 homolog, kinetochore complex component (S. cerevisiae)		212677_s_at	CEP68	centrosomal protein 68kDa
219581_at	1.80417	0.771864	TSEN2	2.33742	NM_025265			212687_at	NM_025265		glycogenin 1		212687_at	LIMS1	LIM and senescent cell antigen-like domains 1
218951_s_at	1.23724	0.529345	PLCXD1	2.3373	NM_018390			212694_s_at	NM_018390		butyrylcholinesterase		212694_s_at	PCCB	propionyl Coenzyme A carboxylase, beta polypeptide
201240_s_at	1.26706	0.542145	SPCS2	2.33712	NM_014752			212720_at	NM_014752		deoxyuridine triphosphatase		212720_at	PAPOLA	poly(A) polymerase alpha
202429_s_at	1.23324	0.52789	PPP3CA	2.33617	NM_000944			212730_at	AL353950		DnaJ (Hsp40) homolog, subfamily C, member 6		212730_at	DMN	desmuslin
221514_at	1.48978	0.637711	UTP14A	2.33614	NM_006649			212731_at	BC001149		kinesin family member 18B		212731_at	ANKRD46	ankyrin repeat domain 46
204771_s_at	1.35734	0.581188	TTF1	2.33546	NM_007344			212745_s_at	AI632304		BCL2-like 1		212745_s_at	BBS4	Bardet-Biedl syndrome 4
204639_at	1.35308	0.579372	ADA	2.33543	NM_000022			212761_at	NM_000022		F-box protein 5		212761_at	TCF7L2	transcription factor 7-like 2 (T-cell specific, HMG-box)
219121_s_at	1.12754	0.482803	RBM35A	2.33539	NM_001034915 /// NM_001122825 /// NM_001122826 /// NM_001122827 /// NM_017697			212764_at	NM_017697		aurora kinase A		212764_at	ZEB1	zinc finger E-box binding homeobox 1
204295_at	1.5392	0.659138	SURF1	2.33517	NM_003172			212766_s_at	NM_003172		replication factor C (activator 1) 3, 38kDa		212766_s_at	ISG20L2	interferon stimulated exonuclease gene 20kDa-like 2
217822_at	1.40611	0.602152	WBP11	2.33514	NM_016312			212767_at	NM_016312		HIRA interacting protein 3		212767_at	MTG1	mitochondrial GTPase 1 homolog (S. cerevisiae)
204521_at	1.59822	0.68476	C12orf24	2.33399	NM_013300			212774_at	NM_013300		cAMP responsive element modulator		212774_at	ZNF238	zinc finger protein 238
202967_at	1.39066	0.595927	GSTA4	2.33361	NM_001512			212801_at	NM_001512		hairy/enhancer-of-split related with YRPW motif 1		212801_at	CIT	citron (rho-interacting, serine/threonine kinase 21)
206173_x_at	1.34591	0.577059	GABPB2	2.33235	NM_002041 /// NM_005254 /// NM_016654 /// NM_016655 /// NM_181427			212810_s_at	NM_002041		ubiquinol-cytochrome c reductase binding protein		212810_s_at	SLC1A4	solute carrier family 1 (glutamate/neutral amino acid transporter), member 4
208880_s_at	1.44406	0.619802	PRPF6	2.32987	NM_012469			212836_at	AB019219		RAD51 homolog (RecA homolog, E. coli) (S. cerevisiae)		212836_at	POLD3	polymerase (DNA-directed), delta 3, accessory subunit
202846_s_at	1.41862	0.609272	PIGC	2.32839	NM_002642 /// NM_153747			212844_at	NM_002642		structural maintenance of chromosomes 6		212844_at	RRP1B	ribosomal RNA processing 1 homolog B (S. cerevisiae)
208990_s_at	1.29725	0.557431	HNRNPH3	2.32719	NM_012207 /// NM_021644			212845_at	AF132362		kazrin		212845_at	SAMD4A	sterile alpha motif domain containing 4A
201581_at	1.33434	0.573687	TXNDC13	2.3259	NM_021156			212855_at	BF572868		poly (ADP-ribose) polymerase family, member 2		212855_at	DCUN1D4	DCN1, defective in cullin neddylation 1, domain containing 4 (S. cerevisiae)
209507_at	1.47738	0.635653	RPA3	2.32419	NM_002947			212905_at	BC005264		chromosome 1 open reading frame 25		212905_at	CSTF2T	cleavage stimulation factor, 3' pre-RNA, subunit 2, 64kDa, tau variant
220690_s_at	1.30468	0.561438	DHRS7B	2.32382	NM_015510			212922_s_at	NM_015510		CDNA: FLJ23070 fis, clone LNG05629		212922_s_at	SMYD2	SET and MYND domain containing 2
220587_s_at	1.67082	0.719128	GBL	2.3234	NM_022372			212943_at	NM_022372		TIP41, TOR signaling pathway regulator-like (S. cerevisiae)		212943_at	KIAA0528	KIAA0528
220311_at	1.3791	0.594375	N6AMT1	2.32026	NM_013240 /// NM_182749			212949_at	NM_013240		mitochondrial trans-2-enoyl-CoA reductase		212949_at	NCAPH	non-SMC condensin I complex, subunit H
206117_at	1.31773	0.568619	TPM1	2.31743	NM_000366 /// NM_001018004 /// NM_001018005 /// NM_001018006 /// NM_001018007 /// NM_001018008 /// NM_001018020			212955_s_at	NM_000366		A kinase (PRKA) anchor protein 1		212955_s_at	POLR2I	polymerase (RNA) II (DNA directed) polypeptide I, 14.5kDa
204386_s_at	1.3695	0.591185	MRP63	2.31654	NM_024026			212973_at	BF303597		metallothionein 1X		212973_at	RPIA	ribose 5-phosphate isomerase A (ribose 5-phosphate epimerase)
204839_at	1.35773	0.586247	POP5	2.31598	NM_015918 /// NM_198202			213007_at	NM_015918		LIM and senescent cell antigen-like domains 1		213007_at	FANCI	Fanconi anemia, complementation group I
208024_s_at	1.5686	0.677978	DGCR6 /// DGCR6L	2.31364	NM_005675 /// NM_033257			213008_at	NM_005675		---		213008_at	FANCI	Fanconi anemia, complementation group I
206015_s_at	1.27361	0.550566	FOXJ3	2.31328	NM_014947			213009_s_at	NM_014947		kelch-like 22 (Drosophila)		213009_s_at	TRIM37	tripartite motif-containing 37
205070_at	1.19663	0.517433	ING3	2.31263	NM_019071 /// NM_198267			213064_at	NM_019071		progesterone receptor membrane component 1		213064_at	ZC3H14	zinc finger CCCH-type containing 14
213720_s_at	1.64314	0.710737	SMARCA4	2.31188	NM_003072			213097_s_at	AI831675		tubulin, delta 1		213097_s_at	ZRF1	zuotin related factor 1
210534_s_at	1.56085	0.675163	B9D1	2.31181	NM_015681			213111_at	BC002944		replication protein A2, 32kDa		213111_at	PIP5K3	phosphatidylinositol-3-phosphate/phosphatidylinositol 5-kinase, type III
203285_s_at	1.35611	0.586675	HS2ST1	2.31151	NM_012262			213129_s_at	NM_012262		SERPINE1 mRNA binding protein 1		213129_s_at	GCSH /// LOC730107	glycine cleavage system protein H (aminomethyl carrier) /// similar to Glycine cleavage system H protein, mitochondrial
203536_s_at	1.47722	0.639234	CIAO1	2.31093	NM_004804			213132_s_at	NM_004804		synaptotagmin binding, cytoplasmic RNA interacting protein		213132_s_at	MCAT	malonyl CoA:ACP acyltransferase (mitochondrial)
212836_at	1.26978	0.54965	POLD3	2.31017	NM_006591			213168_at	D26018		interferon, gamma-inducible protein 16		213168_at	SP3	Sp3 transcription factor
201415_at	1.76522	0.764565	GSS	2.30879	NM_000178			213208_at	NM_000178		replication protein A1, 70kDa		213208_at	KIAA0240	KIAA0240
204369_at	1.35894	0.588647	PIK3CA	2.30858	NM_006218			213222_at	NM_006218		RAD1 homolog (S. pombe)		213222_at	PLCB1	phospholipase C, beta 1 (phosphoinositide-specific)
209849_s_at	1.29625	0.561545	RAD51C	2.30837	NM_002876 /// NM_058216			213226_at	AF029669		stonin 1		213226_at	CCNA2	cyclin A2
215509_s_at	1.22925	0.532822	BUB1	2.30705	NM_004336			213236_at	AL137654		torsin A interacting protein 1		213236_at	SASH1	SAM and SH3 domain containing 1
209566_at	1.24975	0.541965	INSIG2	2.30596	NM_016133			213268_at	AL080184		hairy/enhancer-of-split related with YRPW motif 1		213268_at	CAMTA1	calmodulin binding transcription activator 1
209240_at	1.3369	0.580014	OGT	2.30494	NM_181672 /// NM_181673			213313_at	AF070560		transmembrane protein 5		213313_at	RABGAP1	RAB GTPase activating protein 1
221566_s_at	1.87869	0.815092	NOL3	2.30488	NM_003946			213322_at	AF043244		N-myc (and STAT) interactor		213322_at	C6orf130	chromosome 6 open reading frame 130
203832_at	1.47867	0.641593	SNRPF	2.30468	NM_003095			213330_s_at	NM_003095		transmembrane protein 106B		213330_s_at	STIP1	stress-induced-phosphoprotein 1 (Hsp70/Hsp90-organizing protein)
208775_at	1.24922	0.542407	XPO1	2.30311	NM_003400			213338_at	D89729		baculoviral IAP repeat-containing 5 (survivin)		213338_at	TMEM158	transmembrane protein 158
217916_s_at	1.40686	0.610969	FAM49B	2.30266	NM_016623			213355_at	NM_016623		isoleucyl-tRNA synthetase		213355_at	ST3GAL6	ST3 beta-galactoside alpha-2,3-sialyltransferase 6
212943_at	1.20359	0.523047	KIAA0528	2.30112	NM_014802			213413_at	AB011100		ubiquitin protein ligase E3A (human papilloma virus E6-associated protein, Angelman syndrome)		213413_at	STON1	stonin 1
212414_s_at	1.23465	0.536652	N-PAC /// SEPT6	2.30065	NM_015129 /// NM_032569 /// NM_145799 /// NM_145800 /// NM_145802			213465_s_at	D50918		phosphatidylcholine transfer protein		213465_s_at	PPP1R7	protein phosphatase 1, regulatory (inhibitor) subunit 7
205278_at	1.40085	0.608893	GAD1	2.30065	NM_000817 /// NM_013445			213474_at	NM_000817		ribonuclease H2, subunit A		213474_at	---	Transcribed locus
203680_at	1.30546	0.568055	PRKAR2B	2.29812	NM_002736			213478_at	NM_002736		kinesin family member 23		213478_at	RP1-21O18.1	kazrin
202942_at	1.41016	0.613667	ETFB	2.29792	NM_001014763 /// NM_001985			213479_at	NM_001985		GrpE-like 1, mitochondrial (E. coli)		213479_at	NPTX2	neuronal pentraxin II
214040_s_at	1.3818	0.601366	GSN	2.29777	NM_000177 /// NM_198252			213483_at	BE675337		minichromosome maintenance complex component 10		213483_at	PPWD1	peptidylprolyl isomerase domain and WD repeat containing 1
212774_at	1.23074	0.535633	ZNF238	2.29772	NM_006352 /// NM_205768			213484_at	AJ223321		RAD23 homolog A (S. cerevisiae)		213484_at	---	Clone 23700 mRNA sequence
217815_at	1.563	0.680366	SUPT16H	2.2973	NM_007192			213537_at	NM_007192		SWI/SNF related, matrix associated, actin dependent regulator of chromatin, subfamily d, member 2		213537_at	HLA-DPA1	major histocompatibility complex, class II, DP alpha 1
208784_s_at	1.47969	0.644285	KLHDC3	2.29664	NM_057161			213591_at	BC001793		vaccinia related kinase 3		213591_at	ALDH7A1	aldehyde dehydrogenase 7 family, member A1
204833_at	1.40848	0.613354	ATG12	2.29636	NM_004707			213610_s_at	NM_004707		small nuclear ribonucleoprotein polypeptide A		213610_s_at	KLHL23	kelch-like 23 (Drosophila)
220631_at	1.36424	0.594097	OSGEPL1	2.29633	NM_022353			213624_at	NM_022353		DEAD (Asp-Glu-Ala-Asp) box polypeptide 18		213624_at	SMPDL3A	sphingomyelin phosphodiesterase, acid-like 3A
212228_s_at	1.39881	0.60924	COQ9	2.296	NM_020312			213664_at	AC004382		nucleoporin 93kDa		213664_at	SLC1A1	solute carrier family 1 (neuronal/epithelial high affinity glutamate transporter, system Xag), member 1
220688_s_at	1.22258	0.532563	MRTO4	2.29565	NM_016183			213701_at	NM_016183		uracil-DNA glycosylase		213701_at	C12orf29	chromosome 12 open reading frame 29
221245_s_at	1.36491	0.594635	FZD5	2.29538	NM_003468			213718_at	NM_030804		zinc finger protein 84		213718_at	RBM4	RNA binding motif protein 4
201929_s_at	1.67294	0.72931	PKP4	2.29387	NM_001005476 /// NM_003628			213720_s_at	NM_003628		Bardet-Biedl syndrome 4		213720_s_at	SMARCA4	SWI/SNF related, matrix associated, actin dependent regulator of chromatin, subfamily a, member 4
208951_at	1.41449	0.617668	ALDH7A1	2.29004	NM_001182			213725_x_at	BC002515		cyclin E2		213725_x_at	XYLT1	xylosyltransferase I
200740_s_at	1.40471	0.613496	SUMO3	2.28968	NM_006936			213729_at	NM_006936		minichromosome maintenance complex component 4		213729_at	PRPF40A	PRP40 pre-mRNA processing factor 40 homolog A (S. cerevisiae)
217973_at	1.72465	0.753836	DCXR	2.28783	NM_016286			213857_s_at	NM_016286		iduronate 2-sulfatase (Hunter syndrome)		213857_s_at	CD47	CD47 molecule
215230_x_at	1.46335	0.639769	EIF3C /// EIF3CL	2.2873	NM_001037808 /// NM_001099661 /// NM_003752			213896_x_at	AA679705		cell division cycle 6 homolog (S. cerevisiae)		213896_x_at	FAM149B1	family with sequence similarity 149, member B1
209219_at	1.4178	0.620105	RDBP	2.28638	NM_002904			213971_s_at	L03411		fibroblast growth factor 13		213971_s_at	SUZ12 /// SUZ12P	suppressor of zeste 12 homolog (Drosophila) /// suppressor of zeste 12 homolog pseudogene
221550_at	1.33805	0.585372	COX15	2.28581	NM_004376 /// NM_078470			213982_s_at	BC002382		eyes absent homolog 1 (Drosophila)		213982_s_at	RABGAP1L	RAB GTPase activating protein 1-like
218545_at	1.2091	0.529002	CCDC91	2.28562	NM_018318			213995_at	NM_018318		cytochrome b5 reductase 2		213995_at	ATP5S	ATP synthase, H+ transporting, mitochondrial F0 complex, subunit s (factor B)
217457_s_at	1.30219	0.569754	RAP1GDS1	2.28552	NM_001100426 /// NM_001100427 /// NM_001100428 /// NM_001100429 /// NM_001100430 /// NM_021159			213998_s_at	X63465		UDP-N-acetyl-alpha-D-galactosamine:polypeptide N-acetylgalactosaminyltransferase 7 (GalNAc-T7)		213998_s_at	DDX17	DEAD (Asp-Glu-Ala-Asp) box polypeptide 17
206414_s_at	1.45644	0.637387	DDEF2	2.28501	NM_003887			214022_s_at	NM_003887		translin		214022_s_at	IFITM1	interferon induced transmembrane protein 1 (9-27)
209620_s_at	1.36091	0.595782	ABCB7	2.28425	NM_004299			214040_s_at	AB005289		CDC42 effector protein (Rho GTPase binding) 3		214040_s_at	GSN	gelsolin (amyloidosis, Finnish type)
217301_x_at	1.32264	0.579058	RBBP4	2.28412	NM_005610			214061_at	X71810		PRKC, apoptosis, WT1, regulator		214061_at	WDR67	WD repeat domain 67
221641_s_at	1.22164	0.534844	ACOT9	2.2841	NM_001033583 /// NM_001037171			214073_at	AF241787		RAD54 homolog B (S. cerevisiae)		214073_at	CTTN	cortactin
211075_s_at	1.3473	0.589995	CD47	2.28357	NM_001025079 /// NM_001777 /// NM_198793			214086_s_at	Z25521		homeobox B7		214086_s_at	PARP2	poly (ADP-ribose) polymerase family, member 2
202506_at	1.53256	0.671312	SSFA2	2.28292	NM_006751			214096_s_at	NM_006751		fucose-1-phosphate guanylyltransferase		214096_s_at	SHMT2	serine hydroxymethyltransferase 2 (mitochondrial)
221039_s_at	1.4318	0.627387	DDEF1	2.28217	NM_018482			214097_at	NM_018482		dual-specificity tyrosine-(Y)-phosphorylation regulated kinase 1A		214097_at	RPS21	ribosomal protein S21
201112_s_at	1.36585	0.598969	CSE1L	2.28034	NM_001316			214107_x_at	NM_001316		pinin, desmosome associated protein		214107_x_at	LOC440434	hypothetical protein FLJ11822
208993_s_at	1.4652	0.642848	PPIG	2.27923	NM_004792			214173_x_at	AW340788		nucleolar and spindle associated protein 1		214173_x_at	C19orf2	chromosome 19 open reading frame 2
221726_at	1.30467	0.57256	RPL22	2.27865	NM_000983			214224_s_at	BE250348		CDC14 cell division cycle 14 homolog B (S. cerevisiae) /// CDC14 cell division cycle 14 homolog C (S. cerevisiae)		214224_s_at	PIN4	protein (peptidylprolyl cis/trans isomerase) NIMA-interacting, 4 (parvulin)
202378_s_at	1.34519	0.590594	LEPROT	2.27769	NM_017526			214290_s_at	NM_017526		proliferating cell nuclear antigen		214290_s_at	HIST2H2AA3 /// HIST2H2AA4	histone cluster 2, H2aa3 /// histone cluster 2, H2aa4
218654_s_at	1.38556	0.608381	MRPS33	2.27746	NM_016071 /// NM_053035			214321_at	NM_016071		GDP-mannose 4,6-dehydratase		214321_at	NOV	nephroblastoma overexpressed gene
203097_s_at	1.22322	0.53739	RAPGEF2	2.27623	NM_014247			214331_at	NM_014247		alpha-methylacyl-CoA racemase /// C1q and tumor necrosis factor related protein 3		214331_at	TSFM	Ts translation elongation factor, mitochondrial
220840_s_at	1.25592	0.551969	C1orf112	2.27536	NM_018186			214352_s_at	NM_018186		vascular endothelial zinc finger 1		214352_s_at	KRAS	v-Ki-ras2 Kirsten rat sarcoma viral oncogene homolog
218919_at	1.27193	0.559633	ZFAND1	2.27279	NM_024699			214358_at	NM_024699		acetylserotonin O-methyltransferase-like		214358_at	ACACA	acetyl-Coenzyme A carboxylase alpha
221142_s_at	1.36947	0.602626	PECR	2.2725	NM_018441			214375_at	NM_018441		annexin A11		214375_at	LOC729222 /// PPFIBP1	PTPRF interacting protein, binding protein 1 (liprin beta 1) /// similar to mKIAA1230 protein
217983_s_at	1.84184	0.810858	RNASET2	2.27146	NM_003730			214383_x_at	NM_003730		serine hydroxymethyltransferase 1 (soluble)		214383_x_at	KLHDC3	kelch domain containing 3
210250_x_at	1.45592	0.64124	ADSL	2.27047	NM_000026 /// NM_001123378			214431_at	AF067854		solute carrier organic anion transporter family, member 4A1 /// similar to Solute carrier organic anion transporter family, member 4A1		214431_at	GMPS	guanine monphosphate synthetase
204313_s_at	1.30482	0.574894	CREB1	2.26968	NM_004379 /// NM_134442			214439_x_at	AA161486		integral membrane protein 2B		214439_x_at	BIN1	bridging integrator 1
202932_at	1.43563	0.632795	YES1	2.26871	NM_005433			214451_at	NM_005433		biliverdin reductase A		214451_at	TFAP2B	transcription factor AP-2 beta (activating enhancer binding protein 2 beta)
218105_s_at	1.48401	0.654248	MRPL4	2.26826	NM_015956 /// NM_146387 /// NM_146388			214492_at	NM_015956		polymerase (RNA) II (DNA directed) polypeptide I, 14.5kDa		214492_at	SGCD	sarcoglycan, delta (35kDa dystrophin-associated glycoprotein)
217792_at	1.30687	0.576309	SNX5	2.26765	NM_014426 /// NM_152227			214500_at	NM_014426		ankyrin repeat and SOCS box-containing 9		214500_at	H2AFY	H2A histone family, member Y
212408_at	1.44744	0.638589	TOR1AIP1	2.26662	NM_015602			214608_s_at	AK023204		methylenetetrahydrofolate dehydrogenase (NADP+ dependent) 2, methenyltetrahydrofolate cyclohydrolase		214608_s_at	EYA1	eyes absent homolog 1 (Drosophila)
201928_at	1.33798	0.590314	PKP4	2.26655	NM_001005476 /// NM_003628			214649_s_at	AA194254		SWAP-70 protein		214649_s_at	MTMR2	myotubularin related protein 2
218949_s_at	1.41134	0.622717	QRSL1	2.26642	NM_018292			214722_at	NM_018292		heterochromatin protein 1, binding protein 3		214722_at	NOTCH2NL	Notch homolog 2 (Drosophila) N-terminal like
208848_at	1.33679	0.590051	ADH5	2.26556	NM_000671			214730_s_at	M30471		nuclear factor of activated T-cells, cytoplasmic, calcineurin-dependent 2 interacting protein		214730_s_at	GLG1	golgi apparatus protein 1
213857_s_at	1.25999	0.556201	CD47	2.26535	NM_001025079 /// NM_001777 /// NM_198793			214773_x_at	BG230614		chromatin assembly factor 1, subunit A (p150)		214773_x_at	TIPRL	TIP41, TOR signaling pathway regulator-like (S. cerevisiae)
211814_s_at	1.39092	0.614135	CCNE2	2.26484	NM_057749			214941_s_at	AF112857		polymerase (RNA) I polypeptide C, 30kDa		214941_s_at	PRPF40A	PRP40 pre-mRNA processing factor 40 homolog A (S. cerevisiae)
209052_s_at	1.34591	0.594613	WHSC1	2.2635	NM_001042424 /// NM_007331 /// NM_133330 /// NM_133331 /// NM_133334 /// NM_133335			214953_s_at	BF111870		sorting and assembly machinery component 50 homolog (S. cerevisiae) /// hypothetical protein LOC100131861		214953_s_at	APP	amyloid beta (A4) precursor protein (peptidase nexin-II, Alzheimer disease)
211115_x_at	1.443	0.638134	SIP1	2.26128	NM_001009182 /// NM_001009183 /// NM_003616			215000_s_at	AB037703		non-SMC condensin I complex, subunit D2		215000_s_at	FEZ2	fasciculation and elongation protein zeta 2 (zygin II)
209228_x_at	1.38216	0.611234	TUSC3	2.26127	NM_006765 /// NM_178234			215079_at	U42349		MyoD family inhibitor domain containing		215079_at	---	CDNA: FLJ23070 fis, clone LNG05629
201901_s_at	1.44366	0.638456	YY1	2.26117	NM_003403			215089_s_at	Z14077		cyclin A2		215089_s_at	RBM10	RNA binding motif protein 10
202052_s_at	1.4151	0.625843	RAI14	2.26111	NM_015577			215120_s_at	NM_015577		kinesin family member 1B		215120_s_at	SAMD4A	sterile alpha motif domain containing 4A
201277_s_at	1.44767	0.640281	HNRNPAB	2.26099	NM_004499 /// NM_031266			215136_s_at	NM_004499		split hand/foot malformation (ectrodactyly) type 1		215136_s_at	EXOSC8	exosome component 8
201267_s_at	1.44317	0.638374	PSMC3	2.26069	NM_002804			215230_x_at	AL545523		translin		215230_x_at	EIF3C /// EIF3CL	eukaryotic translation initiation factor 3, subunit C /// eukaryotic translation initiation factor 3, subunit C-like
212405_s_at	1.53592	0.679427	KIAA0859	2.26061	NM_001007239 /// NM_014955 /// NM_015935			215302_at	AK001172		thymopoietin		215302_at	LOC257152	hypothetical protein LOC257152
219277_s_at	1.27063	0.562292	OGDHL	2.25974	NM_018245			215509_s_at	NM_018245		chromosome 19 open reading frame 2		215509_s_at	BUB1	BUB1 budding uninhibited by benzimidazoles 1 homolog (yeast)
201377_at	1.3444	0.595351	UBAP2L	2.25817	NM_014847			215616_s_at	NM_014847		general transcription factor IIH, polypeptide 1, 62kDa		215616_s_at	JMJD2B	jumonji domain containing 2B
219271_at	1.45811	0.645783	GALNT14	2.2579	NM_024572			215629_s_at	NM_024572		BCL2-associated X protein		215629_s_at	DLEU2 /// DLEU2L	deleted in lymphocytic leukemia, 2 /// deleted in lymphocytic leukemia 2-like
213465_s_at	1.40993	0.624535	PPP1R7	2.25756	NM_002712			215646_s_at	BF718769		flap structure-specific endonuclease 1		215646_s_at	VCAN	versican
200969_at	1.2435	0.550821	SERP1	2.25754	NM_014445			215691_x_at	BG107676		Rho GTPase activating protein 12		215691_x_at	C1orf41	chromosome 1 open reading frame 41
207891_s_at	1.73848	0.770092	TREX2 /// UCHL5IP	2.25749	NM_017518 /// NM_080701 /// NM_207107			215785_s_at	NM_017518		glycine cleavage system protein H (aminomethyl carrier) /// similar to Glycine cleavage system H protein, mitochondrial		215785_s_at	CYFIP2	cytoplasmic FMR1 interacting protein 2
211043_s_at	1.48036	0.656362	CLTB	2.2554	NM_001834 /// NM_007097			215982_s_at	BC006332		peripheral myelin protein 22		215982_s_at	DOM3Z	dom-3 homolog Z (C. elegans)
205763_s_at	1.38406	0.613894	DDX18	2.25456	NM_006773			216033_s_at	NM_006773		ribose 5-phosphate isomerase A (ribose 5-phosphate epimerase)		216033_s_at	FYN	FYN oncogene related to SRC, FGR, YES
212368_at	1.28181	0.568834	ZNF292	2.25341	NM_015021			216064_s_at	AA972711		interferon stimulated exonuclease gene 20kDa-like 2		216064_s_at	AGA	aspartylglucosaminidase
203079_s_at	1.3886	0.616382	CUL2	2.25282	NM_003591			216100_s_at	NM_003591		Clone 23700 mRNA sequence		216100_s_at	TOR1AIP1	torsin A interacting protein 1
213168_at	1.44744	0.642661	SP3	2.25226	NM_001017371 /// NM_003111			216194_s_at	AU145005		RNA binding motif protein 25		216194_s_at	TBCB	tubulin folding cofactor B
204681_s_at	1.31016	0.581812	RAPGEF5	2.25187	NM_012294			216228_s_at	NM_012294		xylosyltransferase I		216228_s_at	WDHD1	WD repeat and HMG-box DNA binding protein 1
203560_at	1.35661	0.602736	GGH	2.25076	NM_003878			216237_s_at	NM_003878		replication factor C (activator 1) 3, 38kDa		216237_s_at	MCM5	minichromosome maintenance complex component 5
218442_at	1.19403	0.531072	TTC4	2.24834	NM_004623			216241_s_at	NM_004623		glutamyl-prolyl-tRNA synthetase		216241_s_at	TCEA1	transcription elongation factor A (SII), 1
204247_s_at	1.49357	0.664302	CDK5	2.24832	NM_004935			216321_s_at	NM_004935		geminin, DNA replication inhibitor		216321_s_at	NR3C1	nuclear receptor subfamily 3, group C, member 1 (glucocorticoid receptor)
202266_at	1.35694	0.603603	TTRAP	2.24807	NM_016614			216411_s_at	NM_016614		exosome component 2		216411_s_at	GALK2	galactokinase 2
201737_s_at	1.28574	0.571995	2008-03-06	2.24781	NM_005885			216591_s_at	NM_005885		hyaluronan-mediated motility receptor (RHAMM)		216591_s_at	hCG_1776980 /// SDHC	succinate dehydrogenase complex, subunit C, integral membrane protein, 15kDa /// hCG1776980
204019_s_at	1.32996	0.591689	SH3YL1	2.24773	NM_015677			216602_s_at	NM_015677		nuclear protein, ataxia-telangiectasia locus		216602_s_at	FARSA	phenylalanyl-tRNA synthetase, alpha subunit
203941_at	1.3734	0.611428	INTS9	2.24621	NM_018250			216870_x_at	NM_018250		potassium voltage-gated channel, delayed-rectifier, subfamily S, member 3		216870_x_at	DLEU2	deleted in lymphocytic leukemia, 2
212499_s_at	1.62189	0.722155	FCF1 /// MAPK1IP1L	2.24591	NM_015962 /// NM_144578			216883_x_at	AK025580		dodecenoyl-Coenzyme A delta isomerase (3,2 trans-enoyl-Coenzyme A isomerase)		216883_x_at	PDE6D	phosphodiesterase 6D, cGMP-specific, rod, delta
200993_at	1.23519	0.550096	IPO7	2.2454	NM_006391			216973_s_at	AA939270		G-protein signaling modulator 2 (AGS3-like, C. elegans)		216973_s_at	HOXB7	homeobox B7
200071_at	1.47622	0.657743	SMNDC1	2.24437	NM_005871			217099_s_at	BF224259		---		217099_s_at	GEMIN4	gem (nuclear organelle) associated protein 4
209896_s_at	1.29857	0.578944	PTPN11	2.243	NM_002834			217140_s_at	AF119855		PDS5, regulator of cohesion maintenance, homolog A (S. cerevisiae)		217140_s_at	LOC100132302 /// VDAC1	voltage-dependent anion channel 1 /// similar to Voltage-dependent anion-selective channel protein 1 (VDAC-1) (hVDAC1) (Outer mitochondrial membrane protein porin 1) (Plasmalemmal porin) (Porin 31HL) (Porin 31HM)
214097_at	1.29473	0.577906	RPS21	2.24038	NM_001024			217165_x_at	AW024383		nucleosome assembly protein 1-like 1		217165_x_at	MT1F	metallothionein 1F
208847_s_at	1.38612	0.618908	ADH5	2.23962	NM_000671			217221_x_at	M29872		family with sequence similarity 111, member A		217221_x_at	RBM10	RNA binding motif protein 10
219132_at	1.23628	0.552118	PELI2	2.23916	NM_021255			217280_x_at	NM_021255		KIAA0644 gene product		217280_x_at	GABRA5	gamma-aminobutyric acid (GABA) A receptor, alpha 5
208714_at	1.36705	0.61066	NDUFV1	2.23865	NM_007103			217286_s_at	AF092131		nucleolar protein 8		217286_s_at	HNRNPA3P2 /// NDRG3	NDRG family member 3 /// heterogeneous nuclear ribonucleoprotein A3 pseudogene 2
218774_at	1.36365	0.609287	DCPS	2.23811	NM_014026			217301_x_at	NM_014026		centrosomal protein 55kDa		217301_x_at	RBBP4	retinoblastoma binding protein 4
221940_at	1.42849	0.638267	RPUSD2	2.23808	NM_152260			217457_s_at	AI571208		GINS complex subunit 2 (Psf2 homolog)		217457_s_at	RAP1GDS1	RAP1, GTP-GDP dissociation stimulator 1
201175_at	1.77441	0.792893	TXNDC14	2.23789	NM_015959			217526_at	NM_015959		neuroepithelial cell transforming gene 1		217526_at	NFATC2IP	nuclear factor of activated T-cells, cytoplasmic, calcineurin-dependent 2 interacting protein
221804_s_at	1.3461	0.60203	FAM45A /// FAM45B	2.23594	NM_018472 /// NM_207009			217640_x_at	BE565675		cytochrome b reductase 1		217640_x_at	C18orf24	chromosome 18 open reading frame 24
202370_s_at	1.28373	0.574148	CBFB	2.23588	NM_001755 /// NM_022845			217678_at	NM_001755		growth arrest-specific 7		217678_at	SLC7A11	solute carrier family 7, (cationic amino acid transporter, y+ system) member 11
201326_at	1.37891	0.616746	CCT6A	2.23579	NM_001009186 /// NM_001762			217725_x_at	BE737030		breast cancer 2, early onset		217725_x_at	SERBP1	SERPINE1 mRNA binding protein 1
200702_s_at	1.41339	0.632553	DDX24	2.23443	NM_020414			217731_s_at	BG421209		deleted in lymphocytic leukemia, 2 /// deleted in lymphocytic leukemia 2-like		217731_s_at	ITM2B	integral membrane protein 2B
208643_s_at	1.40904	0.63066	XRCC5	2.23424	NM_021141			217735_s_at	J04977		polo-like kinase 4 (Drosophila)		217735_s_at	EIF2AK1	eukaryotic translation initiation factor 2-alpha kinase 1
209089_at	1.23166	0.551331	RAB5A	2.23398	NM_004162			217761_at	BC001267		tumor suppressor candidate 4		217761_at	ADI1	acireductone dioxygenase 1
212075_s_at	1.35856	0.608483	CSNK2A1	2.23269	NM_001895 /// NM_177559 /// NM_177560			217766_s_at	AI161318		maternal embryonic leucine zipper kinase		217766_s_at	TMEM50A	transmembrane protein 50A
203163_at	1.45218	0.650621	KATNB1	2.23199	NM_005886			217771_at	NM_005886		UDP-N-acetyl-alpha-D-galactosamine:polypeptide N-acetylgalactosaminyltransferase 1 (GalNAc-T1)		217771_at	GOLM1	golgi membrane protein 1
218773_s_at	1.39992	0.627283	MSRB2	2.23172	NM_012228			217772_s_at	NM_012228		syndecan 2		217772_s_at	MTCH2	mitochondrial carrier homolog 2 (C. elegans)
204630_s_at	1.34955	0.604724	GOSR1	2.23168	NM_001007024 /// NM_001007025 /// NM_004871			217786_at	NM_004871		forkhead box M1		217786_at	PRMT5	protein arginine methyltransferase 5
201093_x_at	1.35315	0.606494	SDHA	2.23111	NM_004168			217792_at	NM_004168		methylmalonyl Coenzyme A mutase		217792_at	SNX5	sorting nexin 5
212844_at	1.57905	0.707844	RRP1B	2.23079	NM_015056			217815_at	AI400490		TAF9B RNA polymerase II, TATA box binding protein (TBP)-associated factor, 31kDa /// similar to transcription associated factor TAFII31L		217815_at	SUPT16H	suppressor of Ty 16 homolog (S. cerevisiae)
202214_s_at	1.22126	0.547687	CUL4B	2.22985	NM_001079872 /// NM_003588			217822_at	NM_003588		phenylalanyl-tRNA synthetase, alpha subunit		217822_at	WBP11	WW domain binding protein 11
203095_at	1.35359	0.607494	MTIF2	2.22815	NM_001005369 /// NM_002453			217829_s_at	NM_002453		HIG1 domain family, member 1A		217829_s_at	USP39	ubiquitin specific peptidase 39
218715_at	1.4486	0.650426	UTP6	2.22715	NM_018428			217832_at	NM_018428		minichromosome maintenance complex component 2		217832_at	SYNCRIP	synaptotagmin binding, cytoplasmic RNA interacting protein
209707_at	1.34502	0.604323	PIGK	2.22567	NM_005482			217848_s_at	AF022913		proteasomal ATPase-associated factor 1		217848_s_at	PPA1	pyrophosphatase (inorganic) 1
210559_s_at	1.29753	0.583674	CDC2	2.22303	NM_001786 /// NM_033379			217853_at	D88357		aldehyde dehydrogenase 6 family, member A1		217853_at	TNS3	tensin 3
205046_at	1.34795	0.606435	CENPE	2.22275	NM_001813			217854_s_at	NM_001813		C-terminal binding protein 2		217854_s_at	POLR2E	polymerase (RNA) II (DNA directed) polypeptide E, 25kDa
201804_x_at	1.61404	0.726787	TBCB	2.22078	NM_001281			217869_at	NM_001281		RAS guanyl releasing protein 1 (calcium and DAG-regulated)		217869_at	HSD17B12	hydroxysteroid (17-beta) dehydrogenase 12
221193_s_at	1.50009	0.67564	ZCCHC10	2.22026	NM_017665			217884_at	NM_017665		solute carrier family 1 (glutamate/neutral amino acid transporter), member 4		217884_at	NAT10	N-acetyltransferase 10
212761_at	1.37843	0.621294	TCF7L2	2.21864	NM_030756			217889_s_at	AI949687		polymerase (DNA directed), alpha 1		217889_s_at	CYBRD1	cytochrome b reductase 1
213982_s_at	1.26405	0.569905	RABGAP1L	2.218	NM_001035230 /// NM_014857			217896_s_at	BG107203		CHK1 checkpoint homolog (S. pombe)		217896_s_at	NIP30	NEFA-interacting nuclear protein NIP30
217735_s_at	1.39842	0.630627	EIF2AK1	2.21751	NM_014413			217901_at	AW007368		influenza virus NS1A binding protein		217901_at	DSG2	Desmoglein 2
201714_at	1.37208	0.61876	TUBG1	2.21747	NM_001070			217916_s_at	NM_001070		chromosome 1 open reading frame 164		217916_s_at	FAM49B	family with sequence similarity 49, member B
213208_at	1.33461	0.602204	KIAA0240	2.21621	NM_015349			217923_at	AI801951		major histocompatibility complex, class II, DP alpha 1		217923_at	PEF1	penta-EF-hand domain containing 1
201593_s_at	1.45233	0.655444	ZC3H15	2.21579	NM_018471			217945_at	AV716798		galactokinase 2		217945_at	BTBD1	BTB (POZ) domain containing 1
209093_s_at	1.52587	0.688665	GBA /// GBAP	2.21569	NM_000157 /// NM_001005741 /// NM_001005742 /// NM_001005749 /// NM_001005750 /// NR_002188 /// XR_042183			217947_at	K02920		THAP domain containing 10		217947_at	CMTM6	CKLF-like MARVEL transmembrane domain containing 6
219037_at	1.35985	0.613834	RRP15	2.21533	NM_016052			217957_at	NM_016052		thymopoietin		217957_at	C16orf80	chromosome 16 open reading frame 80
221779_at	1.36161	0.614856	MICALL1	2.21453	NM_033386			217960_s_at	BC001090		cell adhesion molecule 1		217960_s_at	TOMM22	translocase of outer mitochondrial membrane 22 homolog (yeast)
208393_s_at	1.32781	0.599699	RAD50	2.21412	NM_005732 /// NM_133482			217973_at	NM_005732		golgi phosphoprotein 3-like		217973_at	DCXR	dicarbonyl/L-xylulose reductase
218626_at	1.40517	0.63465	EIF4ENIF1	2.21408	NM_019843			217977_at	NM_019843		iroquois homeobox 5		217977_at	SEPX1	selenoprotein X, 1
219032_x_at	1.38887	0.627404	OPN3	2.21368	NM_014322			217983_s_at	NM_014322		pyruvate dehydrogenase (lipoamide) beta		217983_s_at	RNASET2	ribonuclease T2
201739_at	1.25443	0.566673	SGK1	2.21368	NM_005627			217984_at	NM_005627		replication factor C (activator 1) 5, 36.5kDa		217984_at	RNASET2	ribonuclease T2
218149_s_at	1.57413	0.711176	ZNF395	2.21341	NM_018660			218009_s_at	NM_017606		cleavage and polyadenylation specific factor 6, 68kDa		218009_s_at	PRC1	protein regulator of cytokinesis 1
204195_s_at	1.37948	0.623274	PKNOX1	2.21329	NM_004571			218014_at	AL570914		gem (nuclear organelle) associated protein 4		218014_at	NUP85	nucleoporin 85kDa
218079_s_at	1.43915	0.650504	GGNBP2	2.21237	NM_024835			218039_at	NM_024835		REV3-like, catalytic subunit of DNA polymerase zeta (yeast)		218039_at	NUSAP1	nucleolar and spindle associated protein 1
212627_s_at	1.38281	0.625079	EXOSC7	2.21222	NM_015004			218046_s_at	AL581473		kinesin family member 14		218046_s_at	MRPS16	mitochondrial ribosomal protein S16
56256_at	1.2176	0.55106	SIDT2	2.20956	NM_001040455			218053_at	AA150165		Fanconi anemia, complementation group I		218053_at	PRPF40A	PRP40 pre-mRNA processing factor 40 homolog A (S. cerevisiae)
202642_s_at	1.31807	0.596583	TRRAP	2.20937	NM_003496			218079_s_at	NM_003496		sterile alpha motif domain containing 4A		218079_s_at	GGNBP2	gametogenetin binding protein 2
208114_s_at	1.58142	0.715803	ISG20L2	2.2093	NM_030980			218082_s_at	NM_030980		DEK oncogene (DNA binding)		218082_s_at	UBP1	upstream binding protein 1 (LBP-1a)
218053_at	1.39973	0.633636	PRPF40A	2.20905	NM_017892			218105_s_at	NM_017892		ubiquitin specific peptidase 14 (tRNA-guanine transglycosylase)		218105_s_at	MRPL4	mitochondrial ribosomal protein L4
208932_at	1.32162	0.598395	PPP4C	2.20862	NM_002720			218112_at	BC001416		peptidylprolyl isomerase H (cyclophilin H)		218112_at	MRPS34	mitochondrial ribosomal protein S34
219402_s_at	1.36957	0.620497	DERL1	2.20721	NM_024295			218129_s_at	NM_024295		minichromosome maintenance complex component 7		218129_s_at	NFYB	nuclear transcription factor Y, beta
203830_at	1.22095	0.55325	C17orf75	2.20687	NM_022344			218134_s_at	NM_022344		nuclear autoantigenic sperm protein (histone-binding)		218134_s_at	RBM22	RNA binding motif protein 22
208771_s_at	1.36311	0.61784	LTA4H	2.20624	NM_000895			218138_at	J02959		chromosome 12 open reading frame 29		218138_at	MKKS	McKusick-Kaufman syndrome
212264_s_at	1.26467	0.573378	WAPAL	2.20565	NM_015045			218139_s_at	BE645850		prenylcysteine oxidase 1		218139_s_at	C14orf108	chromosome 14 open reading frame 108
214941_s_at	1.34559	0.610133	PRPF40A	2.2054	NM_017892			218149_s_at	AA675900		coiled-coil domain containing 99		218149_s_at	ZNF395	zinc finger protein 395
221588_x_at	1.54954	0.703397	ALDH6A1	2.20294	NM_005589			218168_s_at	AI640855		mutS homolog 5 (E. coli) /// chromosome 6 open reading frame 26		218168_s_at	CABC1	chaperone, ABC1 activity of bc1 complex homolog (S. pombe)
219978_s_at	1.2809	0.581532	NUSAP1	2.20264	NM_016359 /// NM_018454			218185_s_at	NM_018454		sideroflexin 3		218185_s_at	ARMC1	armadillo repeat containing 1
214096_s_at	1.40393	0.637744	SHMT2	2.20141	NM_005412			218191_s_at	AW190316		ribonucleotide reductase M1		218191_s_at	LMBRD1	LMBR1 domain containing 1
200973_s_at	1.40378	0.637685	TSPAN3	2.20137	NM_005724 /// NM_198902			218228_s_at	NM_005724		Bernardinelli-Seip congenital lipodystrophy 2 (seipin) /// heterogeneous nuclear ribonucleoprotein U-like 2		218228_s_at	TNKS2	tankyrase, TRF1-interacting ankyrin-related ADP-ribose polymerase 2
201755_at	1.69654	0.770799	MCM5	2.20102	NM_006739			218244_at	NM_006739		ADP-ribosyltransferase 3		218244_at	NOL8	nucleolar protein 8
201472_at	1.32976	0.604173	VBP1	2.20096	NM_003372			218248_at	NM_003372		sortilin-related receptor, L(DLR class) A repeats-containing		218248_at	FAM111A	family with sequence similarity 111, member A
203883_s_at	1.32625	0.602583	RAB11FIP2	2.20094	NM_014904			218303_x_at	BG249608		amyloid beta (A4) precursor protein (peptidase nexin-II, Alzheimer disease)		218303_x_at	KRCC1	lysine-rich coiled-coil 1
212265_at	1.29835	0.59027	QKI	2.19958	NM_006775 /// NM_206853 /// NM_206854 /// NM_206855			218313_s_at	AL031781		phosphotriesterase related		218313_s_at	GALNT7	UDP-N-acetyl-alpha-D-galactosamine:polypeptide N-acetylgalactosaminyltransferase 7 (GalNAc-T7)
203098_at	1.31934	0.599921	CDYL	2.19919	NM_004824 /// NM_170751 /// NM_170752			218349_s_at	AL050164		palladin, cytoskeletal associated protein		218349_s_at	ZWILCH	Zwilch, kinetochore associated, homolog (Drosophila)
207871_s_at	1.78745	0.812889	ST7	2.19889	NM_018412 /// NM_021908			218350_s_at	NM_018412		zinc finger E-box binding homeobox 1		218350_s_at	GMNN	geminin, DNA replication inhibitor
201512_s_at	1.30516	0.593915	TOMM70A	2.19755	NM_014820			218351_at	BC003633		polymerase (DNA directed), epsilon 2 (p59 subunit)		218351_at	COMMD8	COMM domain containing 8
213313_at	1.27695	0.581141	RABGAP1	2.19732	NM_012197			218354_at	AI922519		receptor accessory protein 1		218354_at	TRAPPC2L	trafficking protein particle complex 2-like
201114_x_at	1.5473	0.704204	PSMA7	2.19724	NM_002792			218361_at	NM_002792		glutaredoxin 5		218361_at	GOLPH3L	golgi phosphoprotein 3-like
200816_s_at	1.34904	0.614094	PAFAH1B1	2.19679	NM_000430			218384_at	NM_000430		phosphoribosyl pyrophosphate amidotransferase		218384_at	CARHSP1	calcium regulated heat stable protein 1, 24kDa
205321_at	1.15881	0.527918	EIF2S3	2.19506	NM_001415			218435_at	NM_001415		NEDD4 binding protein 1		218435_at	DNAJC15	DnaJ (Hsp40) homolog, subfamily C, member 15
217977_at	1.63314	0.744171	SEPX1	2.19457	NM_016332			218442_at	NM_016332		nuclear transcription factor Y, beta		218442_at	TTC4	tetratricopeptide repeat domain 4
206441_s_at	1.43059	0.651936	COMMD4	2.19436	NM_017828			218450_at	NM_017828		gem (nuclear organelle) associated protein 6		218450_at	HEBP1	heme binding protein 1
201647_s_at	1.31369	0.598686	SCARB2	2.19428	NM_005506			218462_at	NM_005506		stimulated by retinoic acid 13 homolog (mouse)		218462_at	BXDC5	brix domain containing 5
204182_s_at	1.32721	0.605048	ZBTB43	2.19356	NM_014007			218465_at	NM_014007		desmuslin		218465_at	TMEM33	transmembrane protein 33
203212_s_at	1.46966	0.670096	MTMR2	2.19322	NM_016156 /// NM_201278 /// NM_201281			218477_at	NM_016156		versican		218477_at	TMEM14A	transmembrane protein 14A
214431_at	1.60372	0.731271	GMPS	2.19306	NM_003875			218542_at	NM_003875		procollagen-lysine, 2-oxoglutarate 5-dioxygenase 2		218542_at	CEP55	centrosomal protein 55kDa
201391_at	1.39142	0.634495	TRAP1	2.19296	NM_016292			218545_at	NM_016292		splicing factor, arginine/serine-rich 7, 35kDa		218545_at	CCDC91	coiled-coil domain containing 91
213007_at	1.43771	0.655814	FANCI	2.19226	NM_001113378 /// NM_018193			218557_at	W74442		ubiquitin specific peptidase 48		218557_at	NIT2	nitrilase family, member 2
218577_at	1.14279	0.521437	LRRC40	2.19161	NM_017768			218559_s_at	NM_017768		aldehyde dehydrogenase 6 family, member A1		218559_s_at	MAFB	v-maf musculoaponeurotic fibrosarcoma oncogene homolog B (avian)
202797_at	1.42634	0.65119	SACM1L	2.19036	NM_014016			218572_at	NM_014016		CSE1 chromosome segregation 1-like (yeast)		218572_at	CHMP4A	chromatin modifying protein 4A
213009_s_at	1.25049	0.571341	TRIM37	2.18869	NM_001005207 /// NM_015294			218575_at	AK022701		butyrophilin, subfamily 3, member A2		218575_at	ANAPC1	anaphase promoting complex subunit 1
201813_s_at	1.25241	0.572701	TBC1D5	2.18684	NM_014744			218577_at	AI654161		versican		218577_at	LRRC40	leucine rich repeat containing 40
206550_s_at	1.403	0.641807	NUP155	2.18602	NM_004298 /// NM_153485			218585_s_at	NM_004298		high-mobility group box 2		218585_s_at	DTL	denticleless homolog (Drosophila)
213355_at	1.48653	0.680207	ST3GAL6	2.18541	NM_006100			218616_at	AI989567		recombination activating gene 1 activating protein 1		218616_at	INTS12	integrator complex subunit 12
221516_s_at	1.41104	0.646282	SMCR7L	2.18332	NM_019008			218622_at	BC002587		ATP-binding cassette, sub-family D (ALD), member 3		218622_at	NUP37	nucleoporin 37kDa
222203_s_at	1.45479	0.666459	NT5C1B /// RDH14	2.18286	NM_001002006 /// NM_020905 /// NM_033253			218626_at	AK023625		S-phase kinase-associated protein 2 (p45)		218626_at	EIF4ENIF1	eukaryotic translation initiation factor 4E nuclear import factor 1
209520_s_at	1.4227	0.652056	NCBP1	2.18187	NM_002486			218628_at	BC001450		mannosyl (alpha-1,6-)-glycoprotein beta-1,2-N-acetylglucosaminyltransferase		218628_at	CCDC53	coiled-coil domain containing 53
213971_s_at	1.38101	0.633058	SUZ12 /// SUZ12P	2.1815	NM_015355			218643_s_at	AI924660		reversion-inducing-cysteine-rich protein with kazal motifs		218643_s_at	CRIPT	cysteine-rich PDZ-binding protein
218888_s_at	1.25765	0.576727	NETO2	2.18066	NM_018092			218653_at	NM_018092		aurora kinase A		218653_at	SLC25A15	solute carrier family 25 (mitochondrial carrier; ornithine transporter) member 15
200653_s_at	1.607	0.737059	CALM1 /// CALM2 /// CALM3	2.18029	NM_001743 /// NM_005184 /// NM_006888			218654_s_at	M27319		versican		218654_s_at	MRPS33	mitochondrial ribosomal protein S33
[truncated: 184 more rows]
